# Supplementary material for: Hypoxia-altered cholesterol homeostasis enhances the expression of interferon-stimulated genes upon SARS-CoV-2 infections in monocytes
Source: Frontiers journal article supplement (doi:10.3389/fimmu.2023.1121864), 2023-06-12
Supplement: Data_Sheet_1.pdf [file Data_Sheet_1.pdf]

## Supplementary Material

# Hypoxia-altered cholesterol homeostasis enhances the expression of interferon-stimulated genes upon SARS-CoV-2 infections in monocytes

Rebekka Bauer, Sofie Patrizia Meyer, Rebecca Raue, Megan Alexandra Palmer, Vanesa Maria Guerrero Ruiz, Giulia Cardamone, Silvia Rösser, Fabian Roesmann, Alexander Wilhelm, Dieter Lütjohann, Kathi Zarnack, Dominik Christian Fuhrmann, Marek Widera, Tobias Schmid\*, Bernhard Brüne

\* Correspondence: Tobias Schmid: [t.schmid@biochem.uni.frankfurt.de](mailto:t.schmid@biochem.uni.frankfurt.de)

## 1 Supplementary Figures and Tables

### 1.1 Supplementary Figures

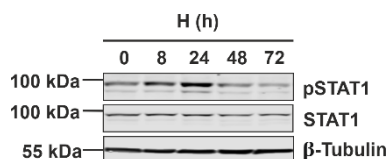

**Supplementary Figure 1: Hypoxia-induced STAT1 activation in THP-1 cells.** THP-1 cells were incubated under hypoxia (H) for the indicated times. pSTAT1 (Tyr701) and STAT1 protein expression was determined by Western blot analysis.  $\beta$ -tubulin served as loading control. The blot is representative of six independent experiments.

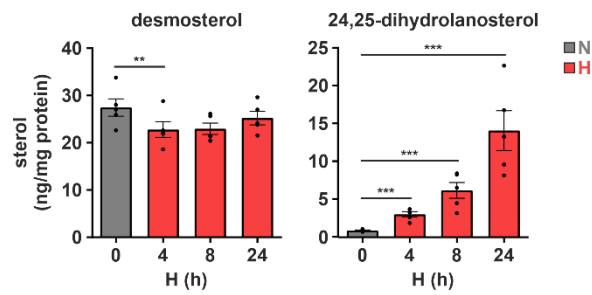

**Supplementary Figure 2: Effect of hypoxia on sterol levels.** THP-1 cells were incubated under normoxia (N, grey) or H (red) for the indicated times ( $n = 5$ ). Sterol levels were measured by GC-MS. Data are means  $\pm$  SEM and were statistically analyzed using one-way repeated measures ANOVA with Holm-Šídák's multiple comparisons test (\*\* $p < 0.01$ , \*\*\* $p < 0.001$ ).

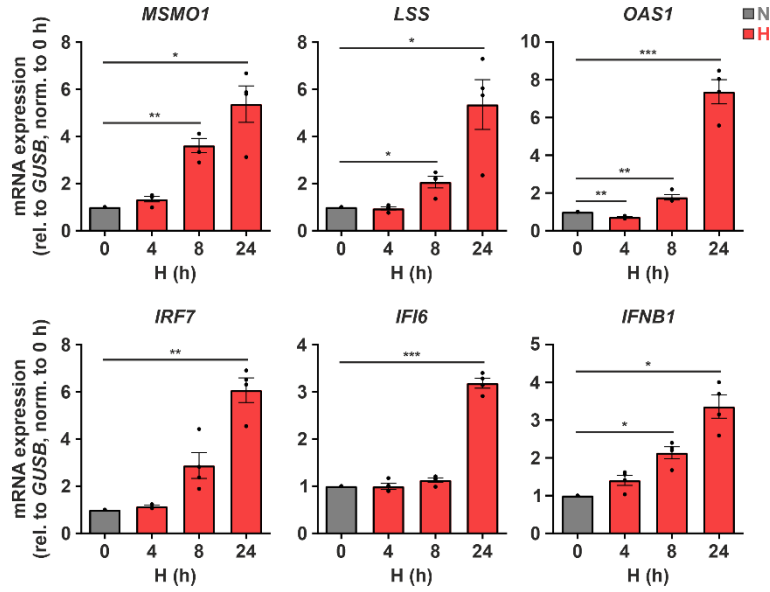

**Supplementary Figure 3: Hypoxia induces cholesterol biosynthesis enzymes and interferon-stimulated genes (ISGs).** THP-1 cells were incubated under N (grey) or H (red) for the indicated times ( $n = 4$ ). *MSMO1*, *LSS*, *OAS1*, *IRF7*, *IFI6*, and *IFNB1* mRNA expression was analyzed by RT-qPCR and normalized to *GUSB* expression. Data are means  $\pm$  SEM and were statistically analyzed using one-way repeated measures ANOVA with Holm-Šidák's multiple comparisons test (\* $p < 0.05$ , \*\* $p < 0.01$ , \*\*\* $p < 0.001$ ).

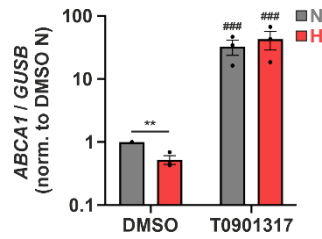

**Supplementary Figure 4: Effect of hypoxia and LXR activation on mRNA expression of the cholesterol exporter *ABCA1*.** THP-1 cells were pre-incubated for 1 h with 1  $\mu$ M T0901317 or DMSO prior to incubation under N (grey) or H (red) for 24 h ( $n = 3$ ). *ABCA1* mRNA expression was analyzed by RT-qPCR and normalized to *GUSB* expression. Data are means  $\pm$  SEM and were statistically analyzed using two-way repeated measures ANOVA with Holm-Šidák's multiple comparisons test (\*\* $p < 0.01$ , \*\*\* $p < 0.001$ ; # compared to DMSO).

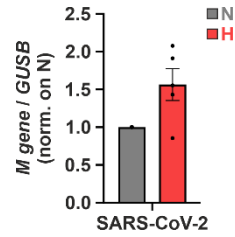

**Supplementary Figure 5: Effect of hypoxia on SARS-CoV-2 infection of THP-1 cells.** THP-1 cells were incubated for 24 h under N (grey) or H (red) in medium containing low levels of FBS prior to infection with SARS-CoV-2 (strain FFM1) under N. RNA was isolated 1 hour post infection. SARS-CoV-2 *M gene* was quantified by RT-qPCR and normalized to *GUSB* expression. Data are means  $\pm$  SEM (n = 5) and were statistically analyzed using two-tailed paired t-test.

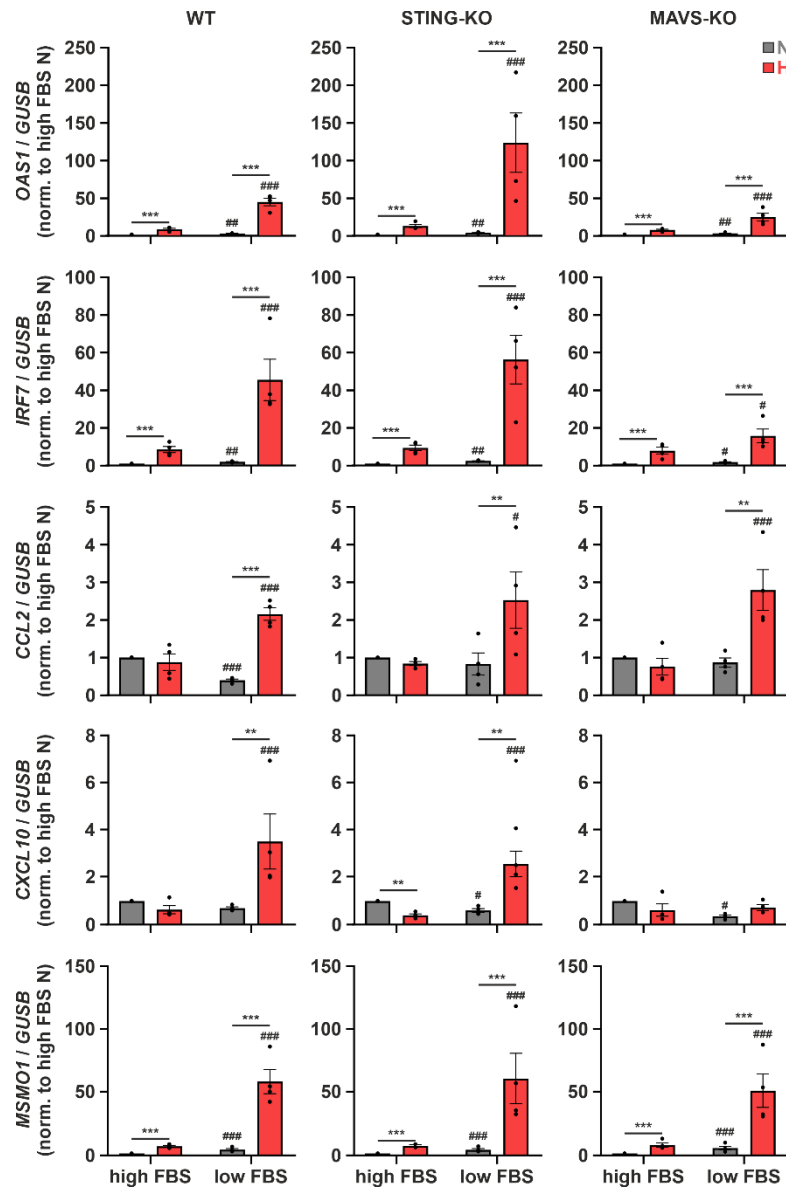

**Supplementary Figure 6: Effect of STING or MAVS deficiency on hypoxic ISG/MSMO1 induction.** WT, STING-, or MAVS-knockout (KO) THP-1 cells were incubated under N (grey) or H (red) for 24 h in medium containing high or low levels of FBS (n = 4). *OAS1*, *IRF7*, *CCL2*, *CXCL10*, and *MSMO1* mRNA expression was analyzed by RT-qPCR and normalized to *GUSB* expression. Data are means  $\pm$  SEM and were statistically analyzed using two-way repeated measures ANOVA with Holm-Šidák's multiple comparisons test (\* $p$  < 0.05, \*\* $p$  < 0.01, \*\*\* $p$  < 0.001; # compared to FBS high).

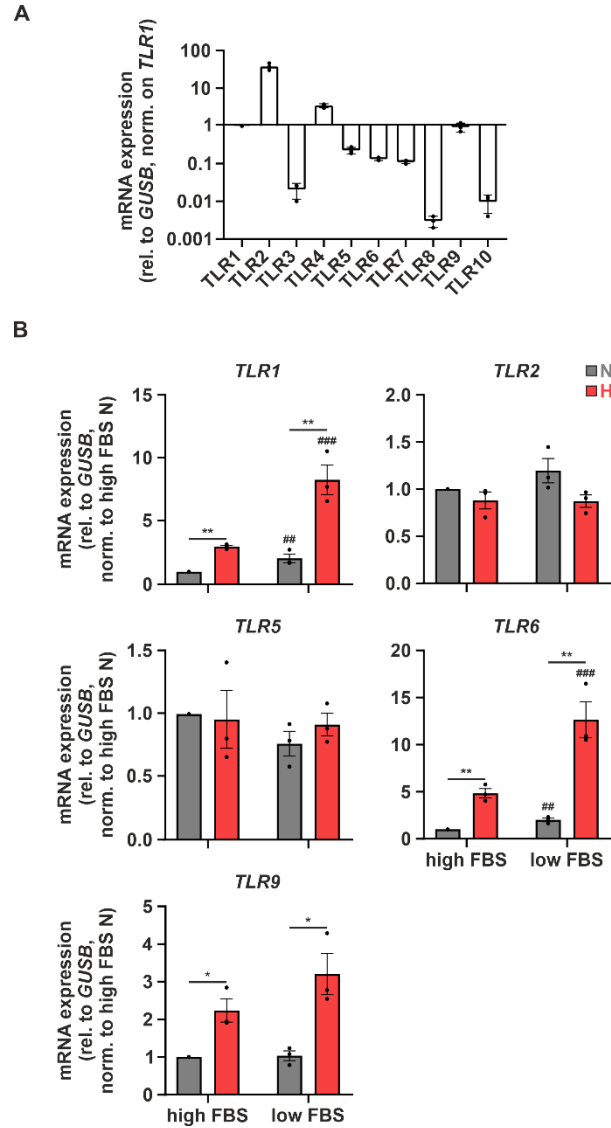

**Supplementary Figure 7: TLR expression in THP-1 cells.** (A) THP-1 cells were incubated under N for 24 h in medium containing high levels of FBS (n = 3). (B) THP-1 cells were incubated under N (grey) or H (red) for 24 h in medium containing high or low levels of FBS (n = 3). mRNA expression of *TLRs 1 - 10* was analyzed by RT-qPCR and normalized to *GUSB* expression. Data are means  $\pm$  SEM and were statistically analyzed using two-way repeated measures ANOVA with Holm-Šidák's multiple comparisons test (\* $p < 0.05$ , \*\* $p < 0.01$ , \*\*\* $p < 0.001$ ; # compared to FBS high).

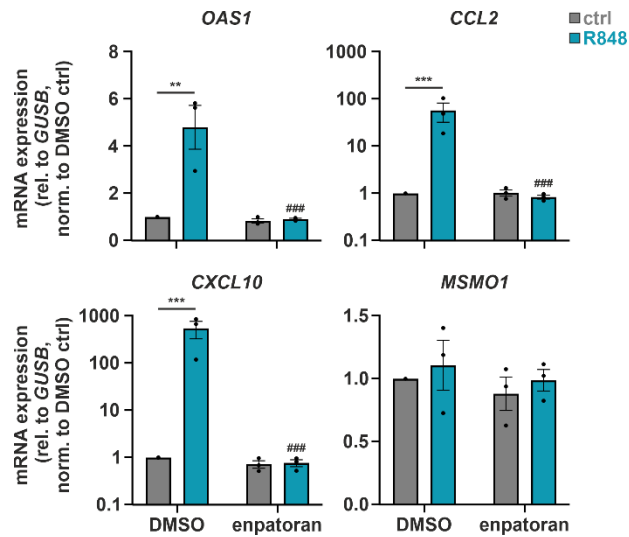

**Supplementary Figure 8: Efficiency of TLR7/8 inhibitor enpatoran in THP-1 cells.** THP-1 cells were pre-incubated for 1 h with 0.1  $\mu$ M enpatoran or DMSO prior to incubation with 1  $\mu$ g/mL resiquimod (R848 (Invivogen, Toulouse, France), blue) or under control conditions (grey) for 24 h ( $n = 3$ ). *OAS1*, *CCL2*, *CXCL10*, and *MSMO1* mRNA expression was analyzed by RT-qPCR and normalized to *GUSB* expression. Data are means  $\pm$  SEM and were statistically analyzed using two-way repeated measures ANOVA with Holm-Šídák's multiple comparisons test (\*\* $p < 0.01$ , \*\*\* $p < 0.001$ ; # compared to DMSO).



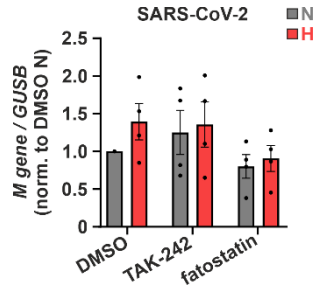

**Supplementary Figure 9: Role of TLR4 and cholesterol on SARS-CoV-2 infection of THP-1 cells.**

THP-1 cells were pre-incubated for 1 h with 10  $\mu$ M TAK-242, 10  $\mu$ M fatostatin, or DMSO in medium containing low levels of FBS prior to incubation under N (grey) or H (red) for 24 h. Subsequently, cells were infected with SARS-CoV-2 (strain FFM1) under N ( $n = 4$ ). RNA was isolated 6 hours post infection. SARS-CoV-2 *M* gene was quantified by RT-qPCR and normalized to *GUSB* expression. Data are means  $\pm$  SEM and were statistically analyzed using two-way repeated measures ANOVA with Holm-Šídák's multiple comparisons test.

## 1.2 Supplementary Tables

**Supplementary Table S1: Primers used in this study.**

| primer            | forward                  | reverse                 |
|-------------------|--------------------------|-------------------------|
| ABCA1             | GCTTTCAATCATCCCCTGAA     | TGACAGGCTTCACTCCACTG    |
| CCL2              | GTCCCAAAGAAGCTGTGATCTTCA | TGGGTTGTGGAGTGAGTGTT    |
| CXCL10            | GTGGCATTCAAGGAGTACCTC    | TGATGGCCTTCGATTCTGGATT  |
| GUSB              | CATTCCTATGCCATCGTGTGGG   | GGGGGTGAGTGTGTTGTTGAT   |
| IFI6              | CCATCTATCAGCAGGCTCCG     | CACCCCACTGCAAGTGAAGA    |
| IFNB1             | GCGACACTGTTCGTGTTGTC     | GCCTCCCATTCAATTGCCAC    |
| LSS               | GCACTGGACGGGTGATTATGG    | CAGCCGGATACAGAGAAGAGA   |
| MSMO1             | AGCATCCTTGGCTGTGGAAT     | CCCATGTCTCTGGCTTATCCTTT |
| OAS1              | ACAGGAACTTGGGTGGTGG      | CTGGGATCGTCGGTCTCATC    |
| SARS-CoV-2 M gene | TGTGACATCAAGGACCTGCC     | CTGAGTCACCTGCTACACGC    |
| TLR1              | GCACCCCTACAAAAGGAATCTG   | TAGGAACGTGGATGAGACCG    |
| TLR2              | ATCCTCCAATCAGGCTTCTCT    | GGACAGGTCAAGGCTTTTTACA  |
| TLR3              | GCTAGCAGTCATCCAACAGAATC  | TGGCGGCTGGTAATCTTCTG    |
| TLR4              | CAACCTCCCCTTCTCAACCAA    | AATTGTCTGGATTTACACCTGGA |
| TLR5              | ACAGTCACCAAACCAGGGATG    | TTCCTGTCTCCAGGTTTCGGA   |
| TLR6              | TCTTCCTCCTGAAAGCAGAAGT   | TTCCGTCGGAGAACTGGATTC   |
| TLR7              | GGCCCATCTCAAGCTGATCT     | GTGTCCACATTGGAAACACCATT |
| TLR8              | TGGGAAAGGAGACTAAAAAGGAAA | TCTTCGGCGCATAACTCACA    |
| TLR9              | AGCATCCTTCCCTGTAGCTG     | TGCGGCAGAAACCCATGC      |
| TLR10             | TGCAAGCCGTGGGAATTCAG     | ATGTCTTCAGGTTGGTGGCA    |
