# Supplementary material for: Hypoxia-altered cholesterol homeostasis enhances the expression of interferon-stimulated genes upon SARS-CoV-2 infections in monocytes
Source: Front Immunol. 2023 Jun 12;14:1121864. doi: 10.3389/fimmu.2023.1121864 (PMC10291055; doi:10.3389/fimmu.2023.1121864)
Supplement: Supplementary Table 2 — Hypoxia-induced gene expression changes and associated functions. [file DataSheet_2.xlsx]

## Sheet: DGE_Heatmap
transcripts downregulated under hypoxia (first cluster)									transcripts upregulated under AH and CH (second cluster)									upregulated mainly under CH (third cluster)
ensembl_gene_id	external_gene_name	log2FC_AH_N	padj_AH_N	log2FC_CH_N	padj_CH_N	log2FC_CH_AH	padj_CH_AH		ensembl_gene_id	external_gene_name	log2FC_AH_N	padj_AH_N	log2FC_CH_N	padj_CH_N	log2FC_CH_AH	padj_CH_AH		ensembl_gene_id	external_gene_name	log2FC_AH_N	padj_AH_N	log2FC_CH_N	padj_CH_N	log2FC_CH_AH	padj_CH_AH
ENSG00000001084	GCLC	-0.092803	0.583485	-0.507634	0.00721119	-0.264166	0.207682		ENSG00000005020	SKAP2	0.442883	0.019215	0.290351	0.131893	-0.183088	0.389584		ENSG00000001167	NFYA	0.0216967	0.946086	0.604994	0.0229032	0.468024	0.069243
ENSG00000003402	CFLAR	-0.00636632	0.987936	-0.596616	0.00133049	-0.563938	0.0035313		ENSG00000005249	PRKAR2B	0.0724323	0.674892	0.448665	0.0143292	0.248746	0.220342		ENSG00000001461	NIPAL3	0.0082182	0.983714	0.497202	0.010764	0.459329	0.0220917
ENSG00000004534	RBM6	-0.0795012	0.637701	-0.388441	0.0386803	-0.1802	0.408355		ENSG00000007944	MYLIP	1.38858	1.96811e-08	1.14788	6.13087e-07	-0.109891	0.696379		ENSG00000002726	AOC1	0.0161227	0.963001	0.50623	0.012572	0.437236	0.0366155
ENSG00000005189	REXO5	-0.0430565	0.832725	-0.958944	1.83584e-07	-0.772663	4.88611e-05		ENSG00000008513	ST3GAL1	0.14837	0.377526	0.424096	0.0324039	0.117604	0.637531		ENSG00000003393	ALS2	0.00830068	0.983714	0.50057	0.0190552	0.458277	0.0353004
ENSG00000005194	CIAPIN1	-0.0623162	0.739497	-0.578603	0.00191996	-0.382752	0.0548887		ENSG00000008988	RPS20	0.119012	0.414577	0.392726	0.0118774	0.155397	0.410374		ENSG00000004399	PLXND1	-0.0195264	0.950886	0.875917	3.02458e-06	0.945041	1.2535e-06
ENSG00000005448	WDR54	0.285692	0.167137	-0.0828239	0.788648	-0.525515	0.0221131		ENSG00000010810	FYN	0.706702	0.00120219	0.310675	0.151679	-0.339792	0.11272		ENSG00000004487	KDM1A	-0.0752904	0.688923	0.26064	0.272293	0.483885	0.0295278
ENSG00000006025	OSBPL7	0.0434348	0.848184	-0.505135	0.0528607	-0.688938	0.00919828		ENSG00000010818	HIVEP2	0.901183	1.24607e-05	1.82667	2.98633e-20	0.677154	0.000542352		ENSG00000004809	SLC22A16	0.0310871	0.906502	0.864536	0.00379897	0.588094	0.0261303
ENSG00000006453	BAIAP2L1	-0.0839949	0.65967	-0.664381	0.0156932	-0.311668	0.240185		ENSG00000019549	SNAI2	0.739393	0.0268617	0.44113	0.0790812	-0.151344	0.541248		ENSG00000004866	ST7	0.0130828	0.97157	0.492765	0.0164446	0.434812	0.0393428
ENSG00000006468	ETV1	0.526312	0.0490595	0.0115606	0.973222	-0.590217	0.0227749		ENSG00000023608	SNAPC1	1.3336	2.28955e-08	0.526157	0.0160538	-0.534619	0.0149718		ENSG00000005238	FAM214B	0.0677129	0.735646	0.613203	0.0277664	0.299537	0.25766
ENSG00000006534	ALDH3B1	0.0110385	0.97553	-0.363932	0.0613108	-0.397719	0.0408342		ENSG00000025039	RRAGD	0.434332	0.0441258	0.67969	0.000713853	0.145206	0.566041		ENSG00000005893	LAMP2	0.0212297	0.938814	0.50939	0.00665182	0.427883	0.0288475
ENSG00000006611	USH1C	-0.0690612	0.734059	-1.0844	0.000126925	-0.644491	0.0114424		ENSG00000026025	VIM	0.790688	0.000595764	1.07446	3.99565e-07	0.20257	0.405885		ENSG00000006607	FARP2	-0.269726	0.151974	0.0416902	0.890366	0.434993	0.0316201
ENSG00000006652	IFRD1	-0.0189241	0.950886	-0.425923	0.0326839	-0.35356	0.0878741		ENSG00000038427	VCAN	1.28075	6.04413e-15	1.82475	1.16895e-29	0.431049	0.0147294		ENSG00000007202	KIAA0100	-0.0284007	0.916902	0.426322	0.0851602	0.535491	0.0293377
ENSG00000007376	RPUSD1	-0.0910583	0.625728	-0.661931	0.00617526	-0.344614	0.166232		ENSG00000040608	RTN4R	0.74059	0.00147598	0.34237	0.12553	-0.327449	0.147957		ENSG00000008282	SYPL1	0.0355453	0.868008	0.4674	0.00673575	0.352508	0.0546995
ENSG00000007392	LUC7L	-0.0233481	0.927702	-0.368642	0.0470367	-0.289597	0.137988		ENSG00000042493	CAPG	0.184414	0.291922	0.552608	0.00527531	0.194982	0.404127		ENSG00000008394	MGST1	-0.0324296	0.897647	0.444703	0.0535481	0.564264	0.0138153
ENSG00000007968	E2F2	-0.140736	0.446824	-1.00562	6.86402e-05	-0.506306	0.0357981		ENSG00000049759	NEDD4L	1.20942	3.29843e-07	0.678645	0.00162392	-0.324297	0.157521		ENSG00000008869	HEATR5B	-0.0300615	0.906065	0.440882	0.0414212	0.546927	0.0113482
ENSG00000008083	JARID2	0.081753	0.637692	-0.214589	0.333252	-0.431717	0.0322871		ENSG00000052802	MSMO1	1.34375	9.54383e-09	1.41509	3.8612e-10	0.0587435	0.847539		ENSG00000008952	SEC62	0.00496275	0.991244	0.396466	0.0176887	0.376886	0.0291289
ENSG00000008283	CYB561	-0.0836559	0.64559	-0.763984	0.000409493	-0.471069	0.0348974		ENSG00000058668	ATP2B4	0.10999	0.495164	0.687786	4.58867e-05	0.41623	0.0234925		ENSG00000010017	RANBP9	-0.0649704	0.739538	0.241216	0.317059	0.440579	0.048874
ENSG00000008441	NFIX	-0.214906	0.245146	-0.490737	0.0174304	-0.111214	0.675538		ENSG00000059728	MXD1	0.151745	0.414577	0.656323	0.0087007	0.244293	0.359572		ENSG00000010270	STARD3NL	0.0224401	0.93712	0.523084	0.0176172	0.423596	0.0607803
ENSG00000008838	MED24	0.0329307	0.897669	-0.452222	0.065702	-0.580713	0.0177316		ENSG00000059804	SLC2A3	1.32693	3.5439e-07	1.24531	3.49421e-07	-0.0204276	0.950598		ENSG00000010278	CD9	0.459714	0.069858	1.92558	0.000227536	0.250507	0.317708
ENSG00000009950	MLXIPL	-0.0465782	0.830782	-0.674861	0.00465952	-0.464448	0.0534725		ENSG00000060558	GNA15	1.22804	7.25632e-11	0.622256	0.000777374	-0.443227	0.0221605		ENSG00000010319	SEMA3G	-0.592568	0.0255561	-0.206786	0.451659	0.381011	0.127204
ENSG00000010256	UQCRC1	0.0239732	0.931448	-0.370439	0.101971	-0.454687	0.0418006		ENSG00000060642	PIGV	0.390353	0.0816978	0.837175	0.000165364	0.256034	0.291712		ENSG00000010404	IDS	0.00295118	0.995468	0.824313	1.81493e-05	0.795264	5.80266e-05
ENSG00000010295	IFFO1	-0.522008	0.0119552	-0.63004	0.00084713	-0.0692743	0.800378		ENSG00000061656	SPAG4	0.414311	0.0912543	1.95581	7.31461e-06	0.44499	0.087274		ENSG00000010610	CD4	0.00266258	0.995851	0.498603	0.0142606	0.480159	0.0210254
ENSG00000011114	BTBD7	-0.141148	0.410917	-0.434515	0.037771	-0.124288	0.633084		ENSG00000063180	CA11	0.0421944	0.838153	0.805959	0.0118733	0.4165	0.0918788		ENSG00000011422	PLAUR	0.00818964	0.984188	0.529928	0.0241015	0.480891	0.0420868
ENSG00000011260	UTP18	-0.0715935	0.673545	-0.367458	0.0432844	-0.178688	0.393133		ENSG00000064309	CDON	0.701037	0.00203147	0.217377	0.360886	-0.428479	0.0462203		ENSG00000012779	ALOX5	0.0272963	0.920814	1.76241	1.47336e-06	1.26557	5.51112e-05
ENSG00000011304	PTBP1	-0.0244289	0.921854	-0.57741	0.000961155	-0.486733	0.00811414		ENSG00000066185	ZMYND12	0.1796	0.349687	0.667033	0.00652858	0.232625	0.380909		ENSG00000013288	MAN2B2	-0.0615361	0.739538	0.257739	0.205687	0.431282	0.0247345
ENSG00000011332	DPF1	0.02002	0.950886	-0.470452	0.0768535	-0.544233	0.0381771		ENSG00000067225	PKM	0.208174	0.268347	0.633948	0.00404243	0.216617	0.389234		ENSG00000014914	MTMR11	-0.0231353	0.93663	0.497483	0.0326839	0.584391	0.0126166
ENSG00000012048	BRCA1	0.0336799	0.886838	-0.31811	0.145255	-0.43052	0.0427746		ENSG00000068366	ACSL4	0.205796	0.258825	0.537035	0.00888836	0.157039	0.532442		ENSG00000017260	ATP2C1	0.0428279	0.848244	0.511082	0.0344888	0.334165	0.180616
ENSG00000013306	SLC25A39	0.0272131	0.916167	-0.390343	0.0549457	-0.480311	0.0170126		ENSG00000070269	TMEM260	0.638317	0.000577504	0.421681	0.018655	-0.189133	0.361535		ENSG00000021355	SERPINB1	-0.0164286	0.956273	0.389604	0.0208475	0.438097	0.010087
ENSG00000013441	CLK1	0.120019	0.465626	-0.297614	0.147045	-0.574576	0.0030903		ENSG00000071575	TRIB2	0.730848	0.000902408	0.38087	0.0719048	-0.288373	0.190492		ENSG00000024862	CCDC28A	0.114802	0.529578	0.645405	0.00599984	0.30213	0.22183
ENSG00000016402	IL20RA	-0.198574	0.28834	-1.20554	0.00140177	-0.309348	0.223863		ENSG00000072042	RDH11	0.037432	0.854791	0.357297	0.0481391	0.241803	0.212883		ENSG00000025423	HSD17B6	0.0114437	0.976925	0.581976	0.024467	0.501494	0.048874
ENSG00000017483	SLC38A5	-0.10713	0.529578	-0.617409	0.00177188	-0.330879	0.123832		ENSG00000072657	TRHDE	0.0280845	0.911586	0.50018	0.00993018	0.394721	0.0517997		ENSG00000026297	RNASET2	0.0712447	0.682091	0.779482	5.25912e-06	0.555523	0.00242382
ENSG00000018610	STEEP1	0.0204723	0.944387	-0.492978	0.0100836	-0.560551	0.00423053		ENSG00000072682	P4HA2	1.00867	0.00335399	0.360345	0.174772	-0.373319	0.151432		ENSG00000027697	IFNGR1	-0.0351411	0.890352	0.446773	0.0882491	0.592003	0.0235532
ENSG00000022277	RTF2	0.0859332	0.628886	-0.353161	0.105313	-0.598198	0.00476225		ENSG00000074695	LMAN1	0.0455417	0.812688	0.368308	0.0298753	0.237523	0.198025		ENSG00000028528	SNX1	0.0233134	0.934585	0.537307	0.0101715	0.438444	0.0426802
ENSG00000023572	GLRX2	0.0559891	0.770253	-0.289087	0.157855	-0.453485	0.0204203		ENSG00000075426	FOSL2	0.198291	0.265501	0.44367	0.0305202	0.0856517	0.75208		ENSG00000030066	NUP160	-0.0875631	0.646796	0.232492	0.403819	0.507803	0.0467295
ENSG00000025156	HSF2	-0.0847392	0.642698	-0.445476	0.0439949	-0.198114	0.431345		ENSG00000077420	APBB1IP	0.292313	0.0792475	0.518626	0.00117534	0.132787	0.519264		ENSG00000034510	TMSB10	-0.0235013	0.933857	0.361618	0.103164	0.443003	0.0430632
ENSG00000025708	TYMP	-0.0857863	0.644859	-0.497533	0.0329407	-0.231207	0.369935		ENSG00000077935	SMC1B	0.0385351	0.86875	0.618019	0.00721119	0.446853	0.0566153		ENSG00000034713	GABARAPL2	3.85004e-05	0.999997	0.562638	0.0171436	0.547132	0.0215895
ENSG00000025770	NCAPH2	0.0145445	0.967669	-0.638819	0.00476136	-0.690116	0.00280742		ENSG00000079459	FDFT1	0.370755	0.062704	0.810796	1.27219e-05	0.299809	0.152881		ENSG00000035681	NSMAF	-0.0726318	0.713413	0.258116	0.325615	0.492364	0.0445924
ENSG00000025772	TOMM34	0.0164374	0.958317	-0.513186	0.00577497	-0.565798	0.00287583		ENSG00000079739	PGM1	0.578764	0.00337944	0.965967	3.39109e-08	0.308017	0.120453		ENSG00000036054	TBC1D23	-0.0577102	0.768657	0.3314	0.123128	0.510279	0.0142703
ENSG00000028137	TNFRSF1B	0.504996	0.0262569	0.0349619	0.915665	-0.505194	0.0196823		ENSG00000080298	RFX3	0.36711	0.0914423	0.677555	0.00189096	0.157089	0.551087		ENSG00000038210	PI4K2B	-0.0847511	0.653092	0.449824	0.0605308	0.737502	0.00233957
ENSG00000028310	BRD9	-0.0693549	0.690237	-0.562139	0.00114767	-0.364555	0.0507484		ENSG00000080503	SMARCA2	0.816913	9.75082e-05	0.315696	0.136057	-0.419169	0.0420528		ENSG00000042980	ADAM28	-0.00476903	0.993596	1.45289	3.23938e-05	1.29247	5.01089e-05
ENSG00000029993	HMGB3	-0.0188666	0.950886	-0.379054	0.0334742	-0.314818	0.0917125		ENSG00000080824	HSP90AA1	0.675964	0.000603046	0.221788	0.290384	-0.411549	0.0334895		ENSG00000043514	TRIT1	-0.0746095	0.706637	0.273456	0.306824	0.522491	0.0391507
ENSG00000033011	ALG1	-0.0607766	0.771381	-0.631428	0.018655	-0.351365	0.17995		ENSG00000081760	AACS	0.155822	0.327858	0.868326	8.21903e-08	0.529063	0.00265921		ENSG00000049769	PPP1R3F	0.0647779	0.755101	1.29122	0.000107752	0.704751	0.00894052
ENSG00000033627	ATP6V0A1	0.291215	0.151167	-0.0959626	0.739736	-0.529447	0.014902		ENSG00000082074	FYB1	0.011943	0.974005	0.480808	0.0245748	0.425876	0.0509452		ENSG00000049860	HEXB	-0.0165633	0.956273	0.513252	0.0551568	0.524737	0.0274704
ENSG00000033800	PIAS1	-0.0736391	0.6581	-0.372347	0.035127	-0.182799	0.36832		ENSG00000083444	PLOD1	0.599105	0.0105864	0.957433	7.54632e-06	0.242984	0.307647		ENSG00000050748	MAPK9	-0.018086	0.956273	0.419919	0.0926478	0.486306	0.0491604
ENSG00000037897	METTL1	-0.0345215	0.888321	-0.75235	0.00108405	-0.576635	0.0130099		ENSG00000083799	CYLD	0.053356	0.792996	0.425074	0.0485257	0.247416	0.290123		ENSG00000053770	AP5M1	-0.0402723	0.853227	0.326169	0.143624	0.460956	0.0331218
ENSG00000039560	RAI14	-0.0371588	0.859817	-0.845049	7.48032e-07	-0.698753	9.5295e-05		ENSG00000084110	HAL	0.239335	0.167571	0.779413	6.17827e-06	0.372768	0.050417		ENSG00000053918	KCNQ1	-0.466529	0.0467091	-0.0989763	0.740354	0.421958	0.0665791
ENSG00000041802	LSG1	-0.17507	0.276735	-0.36247	0.0490223	-0.0530043	0.839451		ENSG00000085117	CD82	0.167301	0.349639	0.613408	0.0030799	0.249675	0.283864		ENSG00000054965	FAM168A	0.10741	0.561015	0.5095	0.0378119	0.194328	0.478086
ENSG00000042286	AIFM2	-0.102731	0.569466	-0.473498	0.0378294	-0.188594	0.471991		ENSG00000088854	DNAAF9	0.12049	0.495164	0.517649	0.0148163	0.214059	0.376462		ENSG00000055208	TAB2	0.0204123	0.950742	0.700397	0.0021308	0.587915	0.0108383
ENSG00000042753	AP2S1	0.0167308	0.956273	-0.331497	0.0794081	-0.383509	0.0416719		ENSG00000089041	P2RX7	0.0748224	0.705255	0.884627	0.00286755	0.455092	0.0791443		ENSG00000058453	CROCC	-0.0215953	0.94586	0.444327	0.0752072	0.525999	0.0341572
ENSG00000043143	JADE2	-0.0185666	0.953601	-0.467087	0.040526	-0.384219	0.0998339		ENSG00000089289	IGBP1	0.0946148	0.560554	0.580114	0.000880963	0.337663	0.076207		ENSG00000059377	TBXAS1	-0.134022	0.458798	0.278576	0.255237	0.614408	0.00811414
ENSG00000046653	GPM6B	-0.0153357	0.963604	-0.649134	0.0023049	-0.570564	0.00918258		ENSG00000092421	SEMA6A	0.571482	0.034868	0.249106	0.361114	-0.330101	0.200015		ENSG00000064012	CASP8	-0.0565227	0.76444	0.233775	0.242463	0.392781	0.0367529
ENSG00000048544	MRPS10	0.0220511	0.934585	-0.448944	0.0109989	-0.517481	0.0040203		ENSG00000092964	DPYSL2	0.66997	0.000112693	0.60369	0.000211093	-0.0486261	0.847631		ENSG00000064201	TSPAN32	-0.0187675	0.95181	0.374275	0.0940343	0.439097	0.0474163
ENSG00000050438	SLC4A8	0.0323461	0.902694	-0.57519	0.0371815	-0.717663	0.00983461		ENSG00000092969	TGFB2	0.877903	0.0113885	0.374655	0.160488	-0.295965	0.265905		ENSG00000064419	TNPO3	-0.050899	0.799791	0.263353	0.221385	0.418932	0.0402923
ENSG00000054793	ATP9A	-0.0328624	0.900164	-1.48705	1.39831e-05	-1.01981	0.000504973		ENSG00000093072	ADA2	0.123612	0.503375	0.898095	0.000404231	0.449741	0.0653734		ENSG00000065809	FAM107B	0.0435707	0.82278	0.489606	0.00354961	0.355454	0.0476354
ENSG00000055130	CUL1	-0.0135094	0.96697	-0.35819	0.0378179	-0.312408	0.081478		ENSG00000093183	SEC22C	0.0621303	0.730536	0.442711	0.0120739	0.266828	0.169551		ENSG00000066855	MTFR1	-0.0674193	0.733703	0.314754	0.188552	0.530817	0.0209659
ENSG00000055483	USP36	-0.344742	0.0837166	-0.615208	0.00152155	-0.14915	0.541698		ENSG00000099875	MKNK2	0.209608	0.195413	0.566632	0.00059871	0.222496	0.251054		ENSG00000067048	DDX3Y	0.0181955	0.950886	0.343588	0.0391136	0.285578	0.102046
ENSG00000056998	GYG2	-0.344194	0.0837166	-0.614475	0.00153782	-0.149328	0.542465		ENSG00000100097	LGALS1	0.117372	0.490791	0.443189	0.0279481	0.164529	0.492269		ENSG00000067064	IDI1	0.214301	0.277949	1.20906	2.85228e-05	0.488047	0.0508096
ENSG00000057757	PITHD1	0.0257318	0.919976	-0.321022	0.118708	-0.404794	0.0449959		ENSG00000100239	PPP6R2	0.084207	0.630312	0.410277	0.0459378	0.179449	0.449054		ENSG00000067167	TRAM1	0.0416968	0.84782	0.451441	0.0402699	0.298251	0.198803
ENSG00000058056	USP13	-0.0256461	0.919284	-0.652621	0.000224553	-0.552577	0.00306532		ENSG00000100292	HMOX1	1.03184	0.00253119	0.498385	0.058116	-0.266486	0.322885		ENSG00000068137	PLEKHH3	-0.0136945	0.97157	0.58693	0.0156911	0.6341	0.00983461
ENSG00000060982	BCAT1	0.0152406	0.963604	-0.383539	0.0610035	-0.433059	0.0335495		ENSG00000100344	PNPLA3	0.622549	0.0136504	1.12702	3.27469e-06	0.297582	0.221384		ENSG00000070061	ELP1	0.0823394	0.646796	0.691425	0.000735695	0.4241	0.0478645
ENSG00000063587	ZNF275	0.018719	0.953601	-0.458145	0.0512536	-0.525949	0.0244338		ENSG00000100433	KCNK10	1.81042	1.10222e-05	0.453668	0.0875341	-0.587014	0.0252446		ENSG00000070081	NUCB2	-0.00268702	0.995632	0.398046	0.0399584	0.402544	0.0402614
ENSG00000064545	TMEM161A	0.0321145	0.891724	-0.30195	0.136446	-0.40368	0.0404289		ENSG00000100554	ATP6V1D	0.479476	0.0121382	0.36849	0.048494	-0.130524	0.565701		ENSG00000070190	DAPP1	0.137795	0.414577	0.478934	0.0171436	0.172264	0.470577
ENSG00000064666	CNN2	0.147277	0.41811	-0.141559	0.645973	-0.518495	0.0476047		ENSG00000100629	CEP128	0.0467864	0.815373	0.425731	0.0316718	0.272934	0.19882		ENSG00000070756	PABPC1	0.0165525	0.958117	0.490773	0.00885723	0.425797	0.0291289
ENSG00000065057	NTHL1	0.0348227	0.885001	-0.399358	0.0857587	-0.524535	0.0221058		ENSG00000101040	ZMYND8	0.240898	0.192104	0.591477	0.00268897	0.187179	0.426776		ENSG00000071082	RPL31	0.0469401	0.812095	0.573802	0.00108153	0.420614	0.0239546
ENSG00000065060	UHRF1BP1	-0.0671105	0.707788	-0.520297	0.00462951	-0.323403	0.1045		ENSG00000101335	MYL9	0.507774	0.0282806	0.536847	0.0129112	-0.021196	0.94805		ENSG00000071967	CYBRD1	0.0584443	0.759539	0.475857	0.0139392	0.293471	0.161508
ENSG00000065268	WDR18	0.0474559	0.81601	-0.536135	0.00898106	-0.701439	0.000806587		ENSG00000101384	JAG1	0.670448	0.0311015	1.81172	4.06006e-05	0.285408	0.283132		ENSG00000072401	UBE2D1	-0.048934	0.823921	0.411256	0.115169	0.607126	0.020096
ENSG00000065548	ZC3H15	-0.0334707	0.875543	-0.428611	0.00848822	-0.325713	0.0605382		ENSG00000101665	SMAD7	0.151974	0.402295	0.588599	0.00756479	0.22902	0.355591		ENSG00000072694	FCGR2B	1.9751	0.000969482	5.15838	5.4694e-16	1.17503	0.000679929
ENSG00000065559	MAP2K4	-0.0767494	0.674892	-0.483083	0.0246029	-0.249386	0.292574		ENSG00000101670	LIPG	1.62444	0.000607255	2.45963	1.07803e-07	0.289726	0.275919		ENSG00000072756	TRNT1	0.0182304	0.953601	0.423869	0.0465777	0.34993	0.11145
ENSG00000065802	ASB1	-0.0278239	0.915902	-0.578114	0.00517617	-0.461939	0.0306811		ENSG00000101782	RIOK3	0.157463	0.298483	0.395748	0.0163991	0.113376	0.591591		ENSG00000075624	ACTB	0.0122466	0.974005	0.593947	0.0357193	0.459346	0.0694971
ENSG00000066117	SMARCD1	-0.165205	0.375247	-0.48498	0.0413509	-0.1162	0.691897		ENSG00000102144	PGK1	0.212344	0.225847	0.390332	0.0481391	0.0372156	0.897407		ENSG00000075884	ARHGAP15	0.0631155	0.735646	0.537501	0.00450267	0.342129	0.092606
ENSG00000067369	TP53BP1	0.213251	0.27223	-0.137915	0.637621	-0.546412	0.0223988		ENSG00000102401	ARMCX3	0.14519	0.345625	0.604386	0.000120084	0.316673	0.0724992		ENSG00000075975	MKRN2	0.082171	0.6697	0.602624	0.0233716	0.283685	0.289039
ENSG00000067445	TRO	-0.163838	0.371241	-0.452316	0.0486563	-0.0996326	0.732033		ENSG00000102531	FNDC3A	0.0163532	0.961946	0.460757	0.0231671	0.393782	0.0591462		ENSG00000077097	TOP2B	-0.0376534	0.853227	0.378465	0.0278888	0.48821	0.00444063
ENSG00000067533	RRP15	-0.364859	0.0331489	-0.521875	0.00117909	-0.0916294	0.679806		ENSG00000102893	PHKB	0.0750091	0.650072	0.385817	0.0269493	0.193966	0.328976		ENSG00000077984	CST7	0.0197285	0.951205	1.13715	0.001059	0.782872	0.00604798
ENSG00000067836	ROGDI	0.0184983	0.950886	-0.561088	0.00268317	-0.622034	0.00118533		ENSG00000103485	QPRT	0.456335	0.012569	0.63662	0.000110921	0.132239	0.544038		ENSG00000078399	HOXA9	-0.0952371	0.579983	0.175949	0.447159	0.413581	0.0406177
ENSG00000067955	CBFB	-0.00733231	0.984561	-0.44504	0.006715	-0.417094	0.0145206		ENSG00000104419	NDRG1	1.66904	3.5346e-22	1.45013	1.90135e-17	-0.152083	0.487301		ENSG00000078596	ITM2A	-0.00697301	0.98776	0.530935	0.0263761	0.547975	0.0222217
ENSG00000067992	PDK3	0.366914	0.0831162	-0.115511	0.672375	-0.59509	0.00535924		ENSG00000104549	SQLE	0.515095	0.0334917	0.963555	3.68858e-05	0.261533	0.292114		ENSG00000080546	SESN1	-0.0357098	0.879496	0.405721	0.0681479	0.531258	0.0157213
ENSG00000068028	RASSF1	-0.0156561	0.963604	-0.477353	0.0218411	-0.410545	0.0551249		ENSG00000104765	BNIP3L	1.72662	2.03556e-22	2.07053	1.11887e-32	0.278915	0.160038		ENSG00000080819	CPOX	-0.0168722	0.963122	0.758945	0.00752275	0.809161	0.00425042
ENSG00000068305	MEF2A	0.193524	0.259852	-0.0600414	0.831209	-0.39417	0.0473082		ENSG00000105048	TNNT1	0.103736	0.579983	0.819935	0.00099194	0.432565	0.0764092		ENSG00000080822	CLDND1	0.0288219	0.915329	0.625328	0.028287	0.412152	0.107146
ENSG00000068400	GRIPAP1	0.0628889	0.750575	-0.275678	0.236726	-0.470677	0.0326712		ENSG00000106070	GRB10	0.704361	0.00112071	0.106874	0.688674	-0.55365	0.00681026		ENSG00000081154	PCNP	0.00571148	0.989473	0.54921	0.00398638	0.519577	0.00843095
ENSG00000068878	PSME4	-0.0850241	0.620314	-0.510705	0.00727768	-0.277391	0.18675		ENSG00000106565	TMEM176B	0.169394	0.340946	0.46716	0.0247565	0.125936	0.628695		ENSG00000081721	DUSP12	-0.118311	0.503343	0.159459	0.546753	0.446133	0.0443654
ENSG00000069011	PITX1	0.0388738	0.871505	-0.403984	0.123128	-0.558089	0.031461		ENSG00000106799	TGFBR1	0.284465	0.160364	0.732326	0.000630047	0.249399	0.298714		ENSG00000082175	PGR	-0.194318	0.25743	0.112579	0.646646	0.449596	0.0209101
ENSG00000069482	GAL	-0.0681782	0.727765	-0.625568	0.00482249	-0.381461	0.0995908		ENSG00000107099	DOCK8	0.0746217	0.700665	0.639765	0.00610345	0.367892	0.126925		ENSG00000083093	PALB2	-0.206499	0.293261	0.284787	0.286441	0.773959	0.00396087
ENSG00000070423	RNF126	-0.675952	0.0114116	-0.377528	0.123242	0.25142	0.331717		ENSG00000107771	CCSER2	0.376499	0.0887779	1.14061	7.83644e-07	0.45715	0.0420868		ENSG00000083857	FAT1	0.0188488	0.95181	0.652505	0.0023271	0.558388	0.0109333
ENSG00000070669	ASNS	0.713386	0.000159625	-0.541491	0.00270551	-1.3662	9.90291e-15		ENSG00000107798	LIPA	0.0910807	0.549959	0.433632	0.00574716	0.225964	0.201979		ENSG00000084092	NOA1	0.0313413	0.90392	0.520161	0.0227925	0.38653	0.100079
ENSG00000070785	EIF2B3	-0.0178548	0.952311	-0.589732	0.000949969	-0.518621	0.00547649		ENSG00000108175	ZMIZ1	0.0654265	0.730536	0.61164	0.00216242	0.394203	0.0605382		ENSG00000085491	SLC25A24	0.00324249	0.995239	0.893787	0.000573601	0.824335	0.00137576
ENSG00000071054	MAP4K4	0.0195048	0.944387	-0.318954	0.0608284	-0.37596	0.0259651		ENSG00000108582	CPD	0.0701741	0.667004	0.3389	0.0413509	0.164713	0.392187		ENSG00000085514	PILRA	0.0292077	0.906237	0.610004	0.0331174	0.374196	0.124469
ENSG00000071205	ARHGAP10	0.0235589	0.932067	-0.424574	0.0481675	-0.505731	0.0179024		ENSG00000109084	TMEM97	0.577118	0.0026509	0.411844	0.0261012	-0.153717	0.489229		ENSG00000085719	CPNE3	0.0140387	0.966391	0.410823	0.024961	0.35908	0.0582022
ENSG00000071462	BUD23	0.153762	0.341208	-0.415518	0.0215325	-0.72708	3.05029e-05		ENSG00000109572	CLCN3	0.148166	0.355691	0.446911	0.0112819	0.156382	0.466667		ENSG00000086598	TMED2	-0.0340168	0.886838	0.591207	0.00515568	0.718739	0.000911817
ENSG00000071894	CPSF1	-0.0370388	0.869848	-0.426082	0.0439949	-0.293173	0.190492		ENSG00000109705	NKX3-2	0.500405	0.0441155	0.774165	0.00119272	0.135539	0.633284		ENSG00000087245	MMP2	-0.0454974	0.834348	0.840338	0.00033434	1.04672	1.80577e-05
ENSG00000072274	TFRC	-1.11249	1.1532e-08	-0.35595	0.0765532	0.615167	0.00167358		ENSG00000109971	HSPA8	0.837747	2.3868e-05	0.464219	0.0166513	-0.296959	0.154853		ENSG00000087460	GNAS	-0.0434888	0.838153	0.62665	0.00347669	0.793555	0.00030396
ENSG00000072506	HSD17B10	0.0288959	0.911586	-0.551953	0.00989613	-0.658981	0.00255101		ENSG00000110172	CHORDC1	0.672592	0.000156109	0.458537	0.0079099	-0.182298	0.371782		ENSG00000087502	ERGIC2	-0.0181881	0.950886	0.331095	0.0735263	0.387146	0.0355452
ENSG00000072778	ACADVL	-0.0564441	0.779927	-0.639751	0.00310392	-0.425904	0.0577127		ENSG00000110218	PANX1	0.365784	0.10152	0.583881	0.0115805	0.0692994	0.82564		ENSG00000088298	EDEM2	-0.155127	0.4102	0.558241	0.0241832	1.06307	7.57095e-05
ENSG00000072840	EVC	0.0141319	0.964671	-0.684028	0.0218095	-0.577735	0.0130099		ENSG00000110921	MVK	0.509732	0.0207083	0.101306	0.713463	-0.429566	0.0431951		ENSG00000088812	ATRN	-0.0788769	0.687218	0.382516	0.136955	0.663561	0.00991696
ENSG00000073050	XRCC1	0.13368	0.45489	-0.267335	0.266685	-0.590842	0.00854756		ENSG00000110934	BIN2	0.139181	0.421547	0.570831	0.00593463	0.242386	0.298846		ENSG00000089127	OAS1	-0.000806812	0.999293	1.30072	7.31715e-06	1.18883	1.80577e-05
ENSG00000074582	BCS1L	0.0704123	0.705673	-0.437601	0.037879	-0.656067	0.00171222		ENSG00000111452	ADGRD1	0.428728	0.0831162	1.1196	0.000115819	0.298074	0.252649		ENSG00000089195	TRMT6	-0.489062	0.0412878	-0.0573627	0.862473	0.482769	0.0360701
ENSG00000074603	DPP8	-0.599237	0.000969482	-0.37029	0.0382078	0.208287	0.298872		ENSG00000111490	TBC1D30	6.11578	7.10889e-211	6.56317	1.84375e-244	0.371331	0.0499993		ENSG00000090238	YPEL3	0.141832	0.446824	1.03603	7.11025e-05	0.508297	0.0364115
ENSG00000074657	ZNF532	0.0692573	0.72325	-0.61669	0.00626019	-0.874902	0.000167602		ENSG00000111707	SUDS3	0.484859	0.0268976	0.911367	5.72479e-06	0.291947	0.187777		ENSG00000091039	OSBPL8	0.0179524	0.950886	0.449585	0.00433766	0.390278	0.0184115
ENSG00000074964	ARHGEF10L	-0.0602837	0.736444	-0.400173	0.0207576	-0.234295	0.221384		ENSG00000111859	NEDD9	1.1392	1.6451e-06	0.637363	0.00326521	-0.314556	0.17391		ENSG00000091490	SEL1L3	-0.0305939	0.908249	0.419151	0.100609	0.539343	0.0327228
ENSG00000075131	TIPIN	-0.0273142	0.916167	-0.415282	0.0388092	-0.316319	0.134567		ENSG00000111962	UST	1.77581	0.000384998	1.00434	0.00339039	-0.157561	0.585555		ENSG00000091527	CDV3	-0.184479	0.245146	0.136612	0.51673	0.445314	0.00986043
ENSG00000075340	ADD2	-0.0603666	0.756966	-0.447501	0.0343307	-0.253658	0.272141		ENSG00000112039	FANCE	0.42767	0.0213746	0.447095	0.0115233	-0.0242617	0.928979		ENSG00000092531	SNAP23	0.0910456	0.584052	0.400312	0.0327716	0.172924	0.431342
ENSG00000075643	MOCOS	-0.00200131	0.99868	-0.633091	0.00742568	-0.604488	0.0114543		ENSG00000112137	PHACTR1	0.946857	0.00442196	0.295333	0.273352	-0.421704	0.102066		ENSG00000093010	COMT	-0.0210727	0.935693	0.694728	0.0213756	0.674214	0.00796947
ENSG00000075702	WDR62	-0.414198	0.0887779	-0.647223	0.0128118	-0.0556797	0.870844		ENSG00000112335	SNX3	0.369957	0.0174317	0.392646	0.00921297	-0.0203562	0.93251		ENSG00000095261	PSMD5	-0.171769	0.367457	0.19126	0.489405	0.571725	0.0178784
ENSG00000075914	EXOSC7	-0.0187881	0.950886	-0.526098	0.00637541	-0.450145	0.0243758		ENSG00000112715	VEGFA	1.95775	6.62708e-12	2.30471	6.34474e-17	0.223453	0.394731		ENSG00000096070	BRPF3	-0.111783	0.532337	0.179405	0.494203	0.462921	0.0406177
ENSG00000076248	UNG	-0.11746	0.489854	-0.582942	0.00284695	-0.289778	0.179823		ENSG00000112761	CCN6	0.617152	0.0350569	0.0549067	0.879958	-0.575277	0.0299103		ENSG00000096746	HNRNPH3	0.00458338	0.993596	0.518702	0.0218259	0.487875	0.0330334
ENSG00000076641	PAG1	0.422671	0.0422049	-0.00837823	0.976692	-0.492502	0.0147294		ENSG00000112972	HMGCS1	0.655356	0.0128356	0.64584	0.00656216	-0.0240266	0.944541		ENSG00000099194	SCD	0.386221	0.0820987	1.6137	1.18487e-11	0.782253	0.000504973
ENSG00000077312	SNRPA	0.00822369	0.983714	-0.421469	0.0436582	-0.445796	0.0334895		ENSG00000113161	HMGCR	0.591503	0.0170478	0.927375	5.90693e-05	0.203673	0.432889		ENSG00000099219	ERMP1	0.125028	0.429029	0.863936	1.49311e-07	0.554879	0.00173581
ENSG00000077684	JADE1	0.0374147	0.862948	-0.340152	0.0962304	-0.459788	0.0213889		ENSG00000113739	STC2	4.73361	9.63867e-49	3.3528	5.53667e-25	-0.956768	0.00015705		ENSG00000099290	WASHC2A	-0.57893	0.0148504	-0.119011	0.668227	0.457767	0.0402614
ENSG00000078487	ZCWPW1	0.152024	0.410917	-0.151068	0.603893	-0.50276	0.0384983		ENSG00000113742	CPEB4	0.589716	0.0174317	0.638795	0.00490408	0.00966501	0.977691		ENSG00000099904	ZDHHC8	-0.111582	0.444664	0.201897	0.407627	0.5394	0.019849
ENSG00000079462	PAFAH1B3	0.076289	0.696024	-0.301301	0.23661	-0.548746	0.0243758		ENSG00000114013	CD86	0.0508067	0.81401	0.654286	0.0191276	0.376942	0.14842		ENSG00000100207	TCF20	0.00722251	0.986488	0.462491	0.0275944	0.427025	0.0459567
ENSG00000079616	KIF22	0.00299302	0.995468	-0.58318	0.0108091	-0.582081	0.0122198		ENSG00000114166	KAT2B	0.084518	0.649089	0.548084	0.0160507	0.278623	0.2542		ENSG00000100307	CBX7	-0.014103	0.970655	0.652744	0.00665182	0.701919	0.00432084
ENSG00000079785	DDX1	0.0435964	0.826344	-0.300846	0.11466	-0.429571	0.0200807		ENSG00000114268	PFKFB4	2.21722	4.65312e-09	2.65594	2.65439e-13	0.22161	0.424442		ENSG00000100368	CSF2RB	-0.341046	0.136548	0.19328	0.504292	0.768649	0.00418145
ENSG00000080823	MOK	0.0751531	0.704944	-0.521164	0.0509544	-0.856618	0.0026093		ENSG00000115306	SPTBN1	0.239567	0.177743	0.517967	0.00586036	0.136547	0.565562		ENSG00000100372	SLC25A17	-0.596729	0.0182149	-0.188818	0.484942	0.397899	0.0955915
ENSG00000080839	RBL1	-0.0372468	0.861425	-0.418929	0.0266915	-0.296001	0.142065		ENSG00000115414	FN1	0.187595	0.317788	0.735832	0.00117534	0.303341	0.206588		ENSG00000100412	ACO2	-0.257774	0.207782	0.301606	0.218756	0.791002	0.0011221
ENSG00000081692	JMJD4	-0.0871052	0.618545	-0.577546	0.0036915	-0.325281	0.13106		ENSG00000115756	HPCAL1	0.903242	0.00244154	0.627184	0.0122471	-0.146779	0.615242		ENSG00000100575	TIMM9	-0.0429974	0.843601	0.333413	0.158495	0.482718	0.0351218
ENSG00000081791	DELE1	0.0197976	0.948777	-0.331312	0.100609	-0.395372	0.0474103		ENSG00000115866	DARS1	0.367702	0.0469131	0.338749	0.070176	-0.0928976	0.696631		ENSG00000100647	SUSD6	0.0386748	0.869848	0.479247	0.0487664	0.318879	0.201976
ENSG00000081913	PHLPP1	0.0424289	0.838153	-0.298573	0.151679	-0.431422	0.0317505		ENSG00000116285	ERRFI1	0.855967	0.0158155	2.22238	2.52657e-06	0.347318	0.180431		ENSG00000100664	EIF5	-0.102866	0.517614	0.159709	0.444328	0.390722	0.0307945
ENSG00000082269	FAM135A	-0.0194275	0.950886	-0.623213	0.00420883	-0.528208	0.017695		ENSG00000116701	NCF2	0.332201	0.113742	0.523442	0.0160507	0.0552263	0.858077		ENSG00000100784	RPS6KA5	-0.486528	0.0526927	0.0177736	0.959182	0.589939	0.0164151
ENSG00000082482	KCNK2	-0.0253694	0.927014	-1.3238	0.0012283	-0.73805	0.0087273		ENSG00000117000	RLF	0.844709	1.19928e-05	0.314362	0.118299	-0.451915	0.0204203		ENSG00000101017	CD40	-0.0558912	0.794937	0.563325	0.026798	0.806987	0.00233957
ENSG00000082512	TRAF5	0.170386	0.326592	-0.115938	0.693958	-0.522868	0.0384983		ENSG00000117139	KDM5B	0.406904	0.0450494	0.329969	0.106624	-0.135182	0.57809		ENSG00000101132	PFDN4	0.0457992	0.830347	0.607312	0.00524675	0.425181	0.05825
ENSG00000083720	OXCT1	0.0183033	0.950974	-0.549457	0.00282406	-0.608609	0.00125725		ENSG00000117245	KIF17	0.727958	0.000632066	0.0901615	0.742883	-0.592113	0.00346319		ENSG00000101190	TCFL5	0.0203109	0.950886	0.718325	0.00313564	0.592977	0.0145206
ENSG00000083845	RPS5	0.112204	0.465626	-0.184011	0.345985	-0.423301	0.0148954		ENSG00000117394	SLC2A1	1.52964	1.13021e-16	1.18873	2.53939e-11	-0.220645	0.299285		ENSG00000101290	CDS2	0.0502198	0.806435	0.75562	0.000121575	0.557778	0.00666441
ENSG00000084207	GSTP1	0.040649	0.843601	-0.348498	0.074783	-0.474466	0.0135061		ENSG00000117500	TMED5	0.0260019	0.916902	0.376902	0.0380903	0.290513	0.130337		ENSG00000101333	PLCB4	0.0326893	0.898791	0.550258	0.0445057	0.362566	0.163673
ENSG00000084774	CAD	-0.0305374	0.903227	-0.58269	0.00400841	-0.459361	0.029032		ENSG00000117620	SLC35A3	0.292454	0.120745	0.749889	4.92512e-05	0.298094	0.151694		ENSG00000101336	HCK	0.00988992	0.980871	0.556964	0.0194825	0.497216	0.0383408
ENSG00000085433	WDR47	0.0792141	0.673545	-0.238104	0.347577	-0.475018	0.0416719		ENSG00000118263	KLF7	0.100705	0.556382	0.423803	0.0395891	0.165991	0.493017		ENSG00000101843	PSMD10	0.092403	0.615632	0.678523	0.00278118	0.372121	0.114103
ENSG00000085662	AKR1B1	0.0494739	0.804581	-0.417689	0.0297829	-0.569639	0.00283689		ENSG00000118503	TNFAIP3	0.52759	0.0418575	0.49693	0.0449615	-0.0875959	0.780107		ENSG00000102007	PLP2	0.0580976	0.756966	0.674635	0.000144771	0.483591	0.0105267
ENSG00000085840	ORC1	-0.164314	0.313297	-0.548317	0.00203152	-0.229833	0.264474		ENSG00000118762	PKD2	0.520801	0.0182099	0.383791	0.071294	-0.154832	0.53497		ENSG00000102218	RP2	-0.0029044	0.995619	0.464493	0.0360941	0.467225	0.0361981
ENSG00000085872	CHERP	-0.188401	0.225054	-0.455208	0.00509007	-0.143697	0.477855		ENSG00000118785	SPP1	0.394031	0.0698451	0.902386	2.09096e-05	0.316261	0.166232		ENSG00000102393	GLA	-0.120841	0.440635	0.131336	0.548261	0.382954	0.0334895
ENSG00000086475	SEPHS1	-0.0242393	0.925209	-0.446523	0.0164095	-0.35995	0.0644039		ENSG00000118816	CCNI	0.0787951	0.618545	0.500366	0.0012283	0.306397	0.071987		ENSG00000102699	PARP4	-0.0639701	0.75267	0.314379	0.195058	0.524156	0.0244338
ENSG00000086827	ZW10	-0.00675246	0.986488	-0.43843	0.0116088	-0.4112	0.0221321		ENSG00000119411	BSPRY	0.820159	0.0025217	0.31004	0.213626	-0.390677	0.10819		ENSG00000102760	RGCC	-0.0130069	0.971832	0.534468	0.0508485	0.566417	0.0323496
ENSG00000087008	ACOX3	-0.333361	0.0915755	-0.582065	0.00297348	-0.126252	0.61767		ENSG00000119950	MXI1	1.24663	4.49904e-12	0.654885	0.000215755	-0.437448	0.0207833		ENSG00000103335	PIEZO1	-0.12719	0.497682	0.416671	0.108685	0.842864	0.00208749
ENSG00000087074	PPP1R15A	-0.0326097	0.897647	-0.627382	0.00666181	-0.474544	0.0436534		ENSG00000120137	PANK3	0.251244	0.124591	0.633843	5.01107e-05	0.261923	0.150906		ENSG00000103353	UBFD1	0.0188229	0.953172	0.757559	0.00103305	0.643801	0.00576523
ENSG00000087077	TRIP6	-0.046994	0.81401	-0.437602	0.0190224	-0.289496	0.150895		ENSG00000120594	PLXDC2	0.595131	0.0211777	0.581111	0.0145208	-0.0449144	0.89281		ENSG00000103381	CPPED1	-0.0120404	0.973787	0.457887	0.0242625	0.496068	0.015514
ENSG00000087086	FTL	0.124527	0.465626	-0.256234	0.25102	-0.548393	0.00811414		ENSG00000120694	HSPH1	0.702472	0.00133959	0.122198	0.638299	-0.534529	0.00974224		ENSG00000103642	LACTB	-0.0590742	0.769677	0.641268	0.00344687	0.867544	0.000120792
ENSG00000087087	SRRT	0.0139468	0.967432	-0.371777	0.0604798	-0.415929	0.0349682		ENSG00000120875	DUSP4	1.26974	0.000603046	1.49154	1.66498e-05	0.104517	0.737372		ENSG00000103671	TRIP4	-0.0452002	0.838309	0.485854	0.0538971	0.670208	0.00857886
ENSG00000087250	MT3	0.129582	0.488957	-0.314339	0.234751	-0.694173	0.0082516		ENSG00000121064	SCPEP1	0.0301822	0.905065	0.570258	0.0063244	0.445455	0.0391476		ENSG00000103707	MTFMT	-0.140976	0.448278	0.196761	0.502538	0.575888	0.0288199
ENSG00000087263	OGFOD1	-0.0615755	0.75413	-0.503076	0.0166614	-0.300185	0.184608		ENSG00000121486	TRMT1L	0.452181	0.0134823	0.431155	0.0131959	-0.0510672	0.841826		ENSG00000104081	BMF	-0.0345307	0.892203	0.644314	0.0101294	0.798302	0.00208749
ENSG00000087266	SH3BP2	-0.622687	0.00941691	-0.784546	0.000286382	-0.107901	0.700747		ENSG00000121552	CSTA	0.136461	0.406702	0.454045	0.0153051	0.164655	0.464938		ENSG00000104093	DMXL2	-0.0348559	0.880667	0.467081	0.0243371	0.587645	0.00484726
ENSG00000087269	NOP14	0.00396169	0.994152	-0.730827	0.000249989	-0.734076	0.000365719		ENSG00000121933	TMIGD3	0.621708	0.0153249	1.07109	1.24381e-05	0.260018	0.298872		ENSG00000104219	ZDHHC2	0.00902734	0.981477	0.586025	0.00205313	0.542668	0.00590745
ENSG00000087365	SF3B2	0.0534073	0.788351	-0.272209	0.213626	-0.43651	0.0358358		ENSG00000121966	CXCR4	1.03763	2.10734e-10	0.491235	0.00380286	-0.451465	0.0103922		ENSG00000104267	CA2	-0.0265032	0.916902	0.387183	0.127726	0.479487	0.0471248
ENSG00000087586	AURKA	-0.0334971	0.877213	-0.522044	0.0013043	-0.414085	0.016217		ENSG00000122420	PTGFR	0.925862	0.00677521	0.681767	0.0134235	-0.107277	0.730096		ENSG00000104299	INTS9	-0.0826442	0.633972	0.354621	0.173149	0.699207	0.0108167
ENSG00000087842	PIR	0.0247503	0.925934	-0.816642	6.54459e-05	-0.911725	1.53129e-05		ENSG00000122884	P4HA1	2.20383	7.11439e-28	2.73044	3.56952e-43	0.402585	0.049035		ENSG00000104324	CPQ	0.0250715	0.925934	0.744496	0.000466363	0.618308	0.00478158
ENSG00000088247	KHSRP	-0.00167326	0.999028	-0.455163	0.00897495	-0.444452	0.013558		ENSG00000123104	ITPR2	0.0263435	0.921685	0.553068	0.0185675	0.429238	0.0718795		ENSG00000104332	SFRP1	0.0695886	0.670322	0.529034	0.00059871	0.347688	0.0388658
ENSG00000088325	TPX2	0.000541762	0.999293	-0.396987	0.0443006	-0.39377	0.049035		ENSG00000123240	OPTN	0.560663	0.0284296	0.807225	0.000907307	0.124742	0.667584		ENSG00000104472	CHRAC1	-0.0314872	0.905065	0.452065	0.0669906	0.575068	0.0194043
ENSG00000088832	FKBP1A	0.0225055	0.934585	-0.368357	0.0607925	-0.44082	0.0234925		ENSG00000123405	NFE2	0.405949	0.0568913	0.691035	0.00059871	0.167932	0.494648		ENSG00000104714	ERICH1	-0.181174	0.286275	0.0952612	0.713463	0.422565	0.0330113
ENSG00000089053	ANAPC5	-0.00562105	0.990369	-0.636891	0.00333266	-0.597993	0.00715744		ENSG00000123612	ACVR1C	0.520413	0.0224331	0.519888	0.0143716	-0.0385016	0.901047		ENSG00000105223	PLD3	-0.0271733	0.916167	1.05766	2.98732e-08	1.1551	4.84605e-09
ENSG00000089094	KDM2B	-0.000145839	0.999997	-0.404595	0.0286769	-0.399447	0.0337241		ENSG00000123810	B9D2	0.58842	0.0104998	0.138995	0.598389	-0.438485	0.0431951		ENSG00000105298	CACTIN	-0.264675	0.176229	0.0773775	0.791288	0.488547	0.0243758
ENSG00000089280	FUS	-0.0576418	0.764011	-0.577977	0.00203152	-0.391336	0.0495077		ENSG00000124496	TRERF1	0.0981415	0.555594	0.505612	0.00721119	0.254592	0.224746		ENSG00000105483	CARD8	-0.04599	0.811968	0.278162	0.125037	0.407679	0.0200571
ENSG00000089820	ARHGAP4	-0.0335025	0.885001	-0.58918	0.00226988	-0.460965	0.0221321		ENSG00000124587	PEX6	0.557149	0.020062	0.467749	0.0378179	-0.108721	0.69989		ENSG00000105875	WDR91	-0.236354	0.164092	0.30034	0.111961	0.672626	0.000120792
ENSG00000090061	CCNK	-0.0282141	0.912739	-0.628613	0.00185489	-0.509623	0.014902		ENSG00000125629	INSIG2	0.237283	0.239636	0.651488	0.00615389	0.186446	0.491942		ENSG00000105982	RNF32	0.0477487	0.829893	0.538439	0.0356306	0.330219	0.200829
ENSG00000090263	MRPS33	0.000495209	0.999293	-0.412039	0.0448075	-0.407856	0.0496533		ENSG00000125703	ATG4C	0.128212	0.455483	0.454511	0.0279421	0.15707	0.525446		ENSG00000106484	MEST	0.0317601	0.897669	0.940758	0.00617712	0.524445	0.0401574
ENSG00000090659	CD209	-0.0466077	0.830652	-0.627017	0.0277664	-0.350897	0.170544		ENSG00000125726	CD70	0.571866	0.00944987	0.797057	5.18119e-05	0.163181	0.506431		ENSG00000106682	EIF4H	0.0197707	0.950886	0.622204	0.0301812	0.436991	0.0825582
ENSG00000090861	AARS1	0.588631	0.00453832	-0.133297	0.586911	-0.746367	0.000100812		ENSG00000125868	DSTN	0.121258	0.434457	0.512399	0.00214377	0.251017	0.18536		ENSG00000106771	TMEM245	0.00850968	0.981753	0.471077	0.00391931	0.438788	0.00982823
ENSG00000091436	MAP3K20	0.0301223	0.897669	-0.611351	0.000285019	-0.70806	3.61951e-05		ENSG00000126264	HCST	0.0431999	0.843601	0.8392	0.000414196	0.609624	0.00983461		ENSG00000107201	DDX58	-0.0524712	0.808099	0.32444	0.199527	0.510603	0.037004
ENSG00000092010	PSME1	0.024668	0.919284	-0.417519	0.0108561	-0.490117	0.0032434		ENSG00000126432	PRDX5	0.237597	0.217187	0.467762	0.0316975	0.0657015	0.826483		ENSG00000107372	ZFAND5	-0.0434668	0.819765	0.324038	0.05616	0.444505	0.00749351
ENSG00000092621	PHGDH	0.174672	0.279798	-0.415475	0.0225958	-0.749751	1.81271e-05		ENSG00000126870	DYNC2I1	0.0708726	0.726934	0.618274	0.0196937	0.320331	0.22248		ENSG00000107566	ERLIN1	-0.0279532	0.916167	0.406036	0.122938	0.513633	0.0444896
ENSG00000092820	EZR	0.0387212	0.852704	-0.287449	0.141258	-0.404733	0.032084		ENSG00000127663	KDM4B	1.28019	1.3412e-08	0.634388	0.00239043	-0.418894	0.0538952		ENSG00000107731	UNC5B	-0.0284172	0.917658	0.827107	0.00610735	0.952005	0.0016828
ENSG00000094804	CDC6	-0.101586	0.543859	-0.398349	0.0415415	-0.150717	0.519894		ENSG00000127920	GNG11	0.449846	0.0788374	0.0390548	0.916227	-0.519195	0.0473666		ENSG00000107929	LARP4B	-0.259675	0.154885	0.0567499	0.83978	0.437861	0.0248455
ENSG00000095066	HOOK2	0.0784263	0.667848	-0.263357	0.257994	-0.489413	0.0243758		ENSG00000128165	ADM2	2.02591	7.35769e-06	0.241572	0.385697	-0.952671	0.00163038		ENSG00000108100	CCNY	0.00264635	0.995953	0.573079	0.0196127	0.542091	0.0274378
ENSG00000095564	BTAF1	-0.134469	0.455483	-0.47991	0.0355762	-0.15279	0.575443		ENSG00000128596	CCDC136	0.281511	0.155181	0.685589	0.022486	0.0581032	0.847173		ENSG00000108219	TSPAN14	-0.00241614	0.996024	0.465541	0.0153051	0.467829	0.0171409
ENSG00000095906	NUBP2	0.0215372	0.936835	-0.560602	0.00201966	-0.630927	0.000693435		ENSG00000128641	MYO1B	0.541699	0.0455073	0.49907	0.0561203	-0.101697	0.745188		ENSG00000108306	FBXL20	-0.233537	0.210448	0.0769116	0.786183	0.45781	0.0297942
ENSG00000096384	HSP90AB1	0.311791	0.0441258	-0.117642	0.542616	-0.496677	0.0011221		ENSG00000128923	MINDY2	0.872436	0.000355461	0.499964	0.0244316	-0.261639	0.278709		ENSG00000108389	MTMR4	0.392282	0.0313621	0.931914	7.67815e-09	0.418482	0.0198635
ENSG00000096968	JAK2	-0.0909033	0.571384	-0.516783	0.0021897	-0.292087	0.118847		ENSG00000129158	SERGEF	-0.0178513	0.958117	0.440405	0.0847231	0.506094	0.0457902		ENSG00000108468	CBX1	0.0328326	0.8868	0.47361	0.0112549	0.359127	0.0680013
ENSG00000096996	IL12RB1	0.0162456	0.963604	-0.762326	0.00357206	-0.818344	0.00196814		ENSG00000129521	EGLN3	6.25311	3.2065e-22	5.93848	5.29541e-21	-0.0839034	0.796935		ENSG00000108561	C1QBP	0.120526	0.503375	0.603376	0.0301812	0.19336	0.490498
ENSG00000099341	PSMD8	0.0070045	0.986488	-0.367202	0.0587343	-0.387162	0.0472832		ENSG00000129538	RNASE1	0.940446	0.00234935	1.249	2.51632e-05	0.15013	0.60723		ENSG00000108651	UTP6	-0.0283556	0.919284	0.398712	0.125105	0.509668	0.0467347
ENSG00000099622	CIRBP	-0.766879	3.15291e-05	-1.23914	6.09397e-13	-0.365814	0.0557381		ENSG00000129757	CDKN1C	0.070083	0.726842	0.579731	0.0160159	0.321254	0.197928		ENSG00000108654	DDX5	-0.420573	0.0342183	-0.0239531	0.932921	0.447885	0.0213485
ENSG00000099817	POLR2E	-0.014938	0.963604	-0.527428	0.00722177	-0.463614	0.0222217		ENSG00000130164	LDLR	0.772	0.000785068	0.349202	0.114254	-0.343236	0.124232		ENSG00000109158	GABRA4	-0.21735	0.266192	0.36712	0.169105	0.999984	0.0011221
ENSG00000099849	RASSF7	0.0699051	0.726934	-0.25949	0.317537	-0.484293	0.0457322		ENSG00000130368	MAS1	0.0616163	0.736444	0.967267	0.00643223	0.39734	0.103821		ENSG00000109323	MANBA	-0.0343388	0.878289	0.476127	0.0715147	0.614961	0.0166195
ENSG00000099899	TRMT2A	-0.138822	0.425049	-0.576111	0.00603461	-0.245347	0.298431		ENSG00000130707	ASS1	0.143231	0.371241	0.67038	7.7984e-05	0.361598	0.0539085		ENSG00000109390	NDUFC1	-0.0228821	0.936673	0.383061	0.106399	0.466003	0.0462999
ENSG00000099956	SMARCB1	0.035499	0.877213	-0.453096	0.0284903	-0.574003	0.00556046		ENSG00000130741	EIF2S3	0.0710229	0.678287	0.570565	0.000867924	0.369953	0.045744		ENSG00000109475	RPL34	0.00172484	0.999028	0.516065	0.0378179	0.492113	0.0470867
ENSG00000100029	PES1	-0.0192815	0.950886	-0.606018	0.005185	-0.513385	0.020648		ENSG00000130772	MED18	0.381653	0.0454379	0.0100218	0.970609	-0.434378	0.0213889		ENSG00000109861	CTSC	-0.0672189	0.719645	0.248595	0.261522	0.442895	0.0320807
ENSG00000100060	MFNG	-0.0244976	0.92664	-0.442592	0.0326839	-0.348264	0.106575		ENSG00000130821	SLC6A8	3.3883	8.8877e-47	3.29768	3.97464e-44	-0.0656767	0.826483		ENSG00000109929	SC5D	0.271187	0.162879	1.20104	7.62543e-09	0.617134	0.00326748
ENSG00000100083	GGA1	-0.0255542	0.920814	-0.464482	0.0202487	-0.367664	0.0777807		ENSG00000130822	PNCK	2.39172	6.04413e-15	3.78362	1.05766e-36	0.960097	0.000200397		ENSG00000110002	VWA5A	0.089942	0.633972	0.617027	0.0125419	0.30394	0.23626
ENSG00000100116	GCAT	0.0317071	0.90392	-0.396067	0.105403	-0.514248	0.0327228		ENSG00000131015	ULBP2	0.986626	0.0059878	0.722118	0.0110456	-0.0998754	0.750561		ENSG00000110013	SIAE	0.0424822	0.841085	1.24819	3.64756e-09	0.992859	2.51092e-06
ENSG00000100138	SNU13	0.0377204	0.862887	-0.516441	0.00831372	-0.644418	0.00121315		ENSG00000131069	ACSS2	0.111918	0.545005	0.881768	0.000508244	0.456379	0.0614541		ENSG00000110422	HIPK3	-0.0364295	0.873872	0.36006	0.0986466	0.483212	0.0234925
ENSG00000100139	MICALL1	-0.064444	0.736444	-0.657329	0.00114767	-0.434809	0.0403521		ENSG00000131791	PRKAB2	0.28319	0.110885	0.38926	0.0358785	0.00137135	0.995979		ENSG00000111144	LTA4H	-0.040753	0.838428	0.730724	1.00801e-05	0.864488	4.24109e-07
ENSG00000100162	CENPM	-0.153656	0.344797	-0.414974	0.0231671	-0.118448	0.610072		ENSG00000131931	THAP1	0.411622	0.0651055	0.853999	7.53621e-05	0.265931	0.262629		ENSG00000111229	ARPC3	-0.0881268	0.644819	0.22369	0.421425	0.495633	0.0496533
ENSG00000100258	LMF2	-0.0692767	0.710059	-0.503629	0.0144487	-0.287809	0.197245		ENSG00000132000	PODNL1	0.133931	0.394749	1.03684	0.00573317	0.252983	0.294788		ENSG00000111252	SH2B3	-0.120435	0.51784	0.174529	0.555185	0.498745	0.048874
ENSG00000100280	AP1B1	0.0100674	0.980871	-0.449431	0.0681129	-0.48129	0.0493582		ENSG00000132196	HSD17B7	0.560568	0.0438177	0.405448	0.124004	-0.181618	0.527827		ENSG00000111335	OAS2	-0.0222437	0.93712	0.470191	0.0296016	0.548906	0.0114823
ENSG00000100281	HMGXB4	-0.0317443	0.893241	-0.40013	0.037771	-0.292263	0.152827		ENSG00000132718	SYT11	0.0931921	0.599126	0.561391	0.0436996	0.196953	0.468768		ENSG00000111358	GTF2H3	-0.0257646	0.927497	0.423468	0.105725	0.524953	0.0421723
ENSG00000100290	BIK	0.277147	0.151167	-0.0771366	0.783964	-0.484447	0.0189646		ENSG00000132824	SERINC3	0.0612947	0.734059	0.471806	0.00656232	0.297162	0.116776		ENSG00000111540	RAB5B	0.0581407	0.758358	0.539858	0.0036915	0.356885	0.0723371
ENSG00000100294	MCAT	-0.0973832	0.579983	-0.70525	0.000505497	-0.414039	0.0542257		ENSG00000133138	TBC1D8B	0.202118	0.266303	0.554204	0.00775233	0.17093	0.492711		ENSG00000111832	RWDD1	-0.0322508	0.889172	0.283033	0.153043	0.383324	0.0462203
ENSG00000100297	MCM5	0.0395703	0.84782	-0.877854	3.55259e-07	-1.01573	1.35655e-08		ENSG00000133639	BTG1	0.339437	0.0383984	0.354161	0.0304354	-0.0449567	0.851063		ENSG00000111875	ASF1A	-0.0110099	0.978526	0.868431	0.00196649	0.878031	0.00158943
ENSG00000100335	MIEF1	-0.0698648	0.680573	-0.385803	0.0278718	-0.202185	0.308818		ENSG00000133687	TMTC1	0.425254	0.0175763	0.10969	0.622271	-0.346009	0.0548887		ENSG00000111913	RIPOR2	0.0102411	0.979186	1.04388	0.00350458	0.726951	0.00956134
ENSG00000100347	SAMM50	-0.0335815	0.887125	-0.466497	0.0245456	-0.341705	0.116716		ENSG00000133835	HSD17B4	0.0906345	0.604135	0.424492	0.0382232	0.182119	0.443303		ENSG00000112033	PPARD	9.84191e-05	0.999997	0.80206	0.00311443	0.749911	0.00485348
ENSG00000100364	KIAA0930	-0.0260564	0.919284	-0.514035	0.00535859	-0.418158	0.0304595		ENSG00000134107	BHLHE40	1.91022	7.72454e-10	1.80765	1.8579e-09	-0.0373032	0.912077		ENSG00000112110	MRPL18	0.103849	0.554694	0.635618	0.00274216	0.335066	0.140306
ENSG00000100365	NCF4	-0.0263589	0.916079	-0.496597	0.00358347	-0.406395	0.0234925		ENSG00000134242	PTPN22	0.1374	0.453447	0.535621	0.0214195	0.189339	0.477104		ENSG00000112234	FBXL4	0.00401489	0.994391	0.695287	0.00390392	0.651186	0.00735395
ENSG00000100379	KCTD17	0.0924408	0.62492	-0.24562	0.368973	-0.531683	0.0363755		ENSG00000134255	CEPT1	0.299278	0.135676	0.468117	0.0257813	0.0363239	0.904847		ENSG00000112276	BVES	-0.00554865	0.990723	0.46144	0.0405879	0.47466	0.0359852
ENSG00000100395	L3MBTL2	-0.013836	0.967714	-0.43388	0.0242495	-0.379902	0.0558385		ENSG00000134324	LPIN1	0.216736	0.253104	0.606146	0.00493403	0.194356	0.440399		ENSG00000112290	WASF1	-0.0214307	0.938814	0.399812	0.0473131	0.470532	0.0191135
ENSG00000100416	TRMU	-0.160698	0.353544	-0.614857	0.00171559	-0.270407	0.218135		ENSG00000134333	LDHA	0.765537	1.02879e-07	1.00613	1.17086e-13	0.213297	0.215826		ENSG00000112406	HECA	-0.212202	0.258094	0.200573	0.420469	0.593017	0.00692136
ENSG00000100417	PMM1	0.130805	0.436408	-0.196133	0.390118	-0.484238	0.016127		ENSG00000134955	SLC37A2	0.615842	0.0310181	0.418322	0.11151	-0.192265	0.499009		ENSG00000112511	PHF1	-0.060637	0.77171	0.346598	0.191316	0.574171	0.0283377
ENSG00000100418	DESI1	-0.0808114	0.618545	-0.406974	0.0171226	-0.206339	0.290123		ENSG00000134986	NREP	0.0766429	0.653196	0.512224	0.00441773	0.301021	0.126319		ENSG00000112624	BICRAL	-0.019087	0.951761	0.455956	0.0466432	0.524463	0.0218322
ENSG00000100483	VCPKMT	-0.366175	0.114904	-0.530166	0.0373264	-0.0013729	0.996918		ENSG00000135218	CD36	0.2488	0.149284	0.861486	1.62312e-07	0.445361	0.0138313		ENSG00000112837	TBX18	0.0780728	0.670866	0.432993	0.0488555	0.200071	0.420194
ENSG00000100577	GSTZ1	-0.00386608	0.994391	-0.67157	0.000531012	-0.644378	0.00137367		ENSG00000135318	NT5E	0.0672819	0.7422	1.3062	8.0652e-05	0.71148	0.00811414		ENSG00000112977	DAP	-0.130038	0.462963	0.469688	0.0331956	0.821978	0.000209828
ENSG00000100644	HIF1A	-0.54273	0.0153249	-0.637628	0.00176368	-0.0515726	0.864227		ENSG00000135365	PHF21A	0.368438	0.0730752	0.825089	2.39805e-05	0.29858	0.168385		ENSG00000112984	KIF20A	-0.102242	0.58521	0.461738	0.067135	0.822821	0.00169636
ENSG00000100911	PSME2	0.0114379	0.975853	-0.584482	0.00783377	-0.621568	0.0056103		ENSG00000135677	GNS	0.152576	0.356176	0.468732	0.0115235	0.16296	0.468817		ENSG00000113269	RNF130	0.0623229	0.76596	0.587155	0.0276993	0.315276	0.23289
ENSG00000100949	RABGGTA	0.0126502	0.973545	-0.460006	0.0621108	-0.502709	0.0402353		ENSG00000135766	EGLN1	0.572632	0.00881041	0.656431	0.000867924	0.0547596	0.851063		ENSG00000113328	CCNG1	-0.0577678	0.772326	0.713087	0.000719678	0.933893	1.64459e-05
ENSG00000100983	GSS	0.000460756	0.999293	-0.54926	0.0112819	-0.539954	0.0145206		ENSG00000135821	GLUL	0.821036	0.000119555	0.802152	4.13794e-05	0.00266175	0.993949		ENSG00000113441	LNPEP	0.0470871	0.81401	0.569568	0.00177638	0.411724	0.0329975
ENSG00000100997	ABHD12	0.0120244	0.974005	-0.523122	0.0127156	-0.561849	0.00868748		ENSG00000135862	LAMC1	0.0272514	0.916322	0.49047	0.0171441	0.383607	0.0728759		ENSG00000113532	ST8SIA4	0.00299681	0.995239	0.521474	0.00452554	0.503531	0.00796947
ENSG00000101003	GINS1	-0.128645	0.410917	-0.452045	0.0096104	-0.182211	0.380803		ENSG00000135951	TSGA10	0.120352	0.503343	0.605377	0.00658737	0.275996	0.253648		ENSG00000113583	C5orf15	-0.0224395	0.927337	0.403183	0.0995647	0.456759	0.0391476
ENSG00000101057	MYBL2	-0.00969301	0.980871	-0.634494	0.0021897	-0.581672	0.00636631		ENSG00000136235	GPNMB	0.453221	0.0478429	0.886902	5.07552e-05	0.263574	0.272491		ENSG00000113593	PPWD1	-0.00814873	0.984561	0.467252	0.0587343	0.49003	0.0462203
ENSG00000101146	RAE1	-0.0110423	0.976925	-0.561364	0.00888836	-0.504701	0.0217043		ENSG00000136830	NIBAN2	0.49795	0.0294357	0.468933	0.0308895	-0.0725138	0.805844		ENSG00000114023	FAM162A	0.0849962	0.657267	0.539296	0.0308907	0.249977	0.347936
ENSG00000101161	PRPF6	0.0492943	0.80815	-0.261321	0.229418	-0.413612	0.0451074		ENSG00000136854	STXBP1	0.189285	0.315865	0.760518	0.000853554	0.318683	0.181935		ENSG00000114480	GBE1	0.578161	0.0157277	1.99738	2.63309e-17	1.00357	9.5884e-06
ENSG00000101236	RNF24	0.258597	0.18256	-0.0559705	0.858534	-0.459615	0.033888		ENSG00000137509	PRCP	0.117776	0.458326	0.399904	0.0272094	0.143015	0.516387		ENSG00000114796	KLHL24	-0.201791	0.284138	0.893487	6.03004e-05	1.45389	1.80641e-09
ENSG00000101246	ARFRP1	0.00357772	0.995101	-0.498053	0.0317612	-0.501645	0.0315257		ENSG00000137831	UACA	0.0743549	0.702253	0.513074	0.028611	0.263753	0.295477		ENSG00000114902	SPCS1	-0.0101644	0.980871	0.573869	0.0227334	0.603524	0.0166195
ENSG00000101311	FERMT1	-0.0242955	0.930562	-0.497543	0.0299231	-0.390801	0.0963828		ENSG00000137992	DBT	0.198587	0.25743	0.542942	0.00482249	0.181507	0.431248		ENSG00000114978	MOB1A	-0.0455425	0.824845	0.270569	0.213285	0.413952	0.0462203
ENSG00000101346	POFUT1	-0.223676	0.193341	-0.412661	0.0275944	-0.0576612	0.828648		ENSG00000138336	TET1	1.57662	5.52434e-08	0.526012	0.0293677	-0.607021	0.0111358		ENSG00000115239	ASB3	-0.450831	0.062704	-0.0195812	0.954236	0.517068	0.0315216
ENSG00000101361	NOP56	-0.127156	0.450664	-0.41911	0.0367867	-0.133291	0.590253		ENSG00000138448	ITGAV	0.106144	0.535968	0.43368	0.034815	0.16756	0.488545		ENSG00000115267	IFIH1	0.02526	0.925209	0.515311	0.0158467	0.409648	0.0625841
ENSG00000101363	MANBAL	0.00177693	0.999028	-0.515198	0.0344653	-0.508432	0.0366155		ENSG00000138468	SENP7	0.0996789	0.582473	0.678475	0.00209243	0.367066	0.11145		ENSG00000115415	STAT1	-0.277833	0.0855617	0.0408504	0.870441	0.403875	0.0152649
ENSG00000101365	IDH3B	-0.0371994	0.873872	-0.590007	0.00902871	-0.429874	0.0640617		ENSG00000138640	FAM13A	0.526834	0.0546218	0.735628	0.0173555	-0.00114951	0.997156		ENSG00000115446	UNC50	-0.0161277	0.963604	0.489985	0.0593059	0.548357	0.0329525
ENSG00000101391	CDK5RAP1	-0.119497	0.506397	-0.668501	0.00348264	-0.321588	0.184409		ENSG00000138767	CNOT6L	0.723469	0.00150915	0.143736	0.583737	-0.524164	0.0142134		ENSG00000115548	KDM3A	0.131138	0.430951	1.01439	0.00486935	0.274671	0.268534
ENSG00000101412	E2F1	-0.0866185	0.615618	-0.588468	0.00203152	-0.34296	0.0966364		ENSG00000138768	USO1	0.0731302	0.686033	0.45575	0.0233476	0.241889	0.277644		ENSG00000115594	IL1R1	0.0474942	0.831454	0.610013	0.0196937	0.381993	0.138829
ENSG00000101811	CSTF2	-0.0920241	0.599356	-0.456737	0.0287597	-0.205641	0.389506		ENSG00000139269	INHBE	1.00377	0.00931431	0.943106	0.00432475	-0.0176355	0.959168		ENSG00000115816	CEBPZ	-0.0949445	0.567785	0.161159	0.47542	0.391147	0.0443654
ENSG00000101935	AMMECR1	0.420119	0.0130257	0.0309524	0.904042	-0.418961	0.0121131		ENSG00000139433	GLTP	0.135356	0.465626	0.548671	0.0333483	0.172726	0.548		ENSG00000115919	KYNU	0.124538	0.499709	1.0994	2.34011e-05	0.581178	0.0161962
ENSG00000101940	WDR13	0.0754174	0.687522	-0.227401	0.350485	-0.448117	0.0446696		ENSG00000140386	SCAPER	0.0592481	0.774675	0.505178	0.0363586	0.285073	0.262322		ENSG00000115966	ATF2	0.0646715	0.731186	0.722019	0.00016753	0.498249	0.0138124
ENSG00000102226	USP11	0.411202	0.0691545	-0.0140343	0.965816	-0.517937	0.0219841		ENSG00000140416	TPM1	0.946163	0.00228613	0.50467	0.0475158	-0.250122	0.351601		ENSG00000116171	SCP2	-0.0419369	0.843601	0.286736	0.20344	0.424471	0.0495077
ENSG00000102743	SLC25A15	0.0784464	0.680573	-0.447657	0.0607925	-0.714671	0.00287583		ENSG00000141458	NPC1	0.110395	0.540331	0.711261	0.00159021	0.371529	0.112577		ENSG00000116199	FAM20B	-0.0263809	0.919284	0.346182	0.0946829	0.433309	0.0334895
ENSG00000103021	CCDC113	-0.0457233	0.82459	-0.6023	0.0346975	-0.307894	0.196932		ENSG00000141526	SLC16A3	0.89162	3.19247e-05	0.358977	0.0918463	-0.427287	0.0423605		ENSG00000116209	TMEM59	-0.00820378	0.983714	0.742638	0.000211093	0.764444	0.000209828
ENSG00000103199	ZNF500	-0.226942	0.235975	-0.435269	0.048716	-0.0436585	0.889944		ENSG00000141562	NARF	0.895778	7.75689e-06	0.761713	5.07552e-05	-0.0839858	0.749149		ENSG00000116406	EDEM3	-0.133592	0.457085	0.454337	0.0462927	0.820772	0.000355454
ENSG00000103249	CLCN7	-0.0824862	0.6581	-0.60687	0.00763352	-0.332562	0.167812		ENSG00000141664	ZCCHC2	0.617914	0.00371585	0.686314	0.000360101	0.0534049	0.852573		ENSG00000116473	RAP1A	-0.0314309	0.90392	0.495367	0.0328725	0.615535	0.00848973
ENSG00000103257	SLC7A5	0.357966	0.0953703	-0.134769	0.622277	-0.62478	0.00494197		ENSG00000142396	ERVK3-1	0.53247	0.0153249	0.332213	0.122482	-0.20854	0.37309		ENSG00000116668	SWT1	-0.0477456	0.815604	0.359283	0.171766	0.550426	0.0333932
ENSG00000103326	CAPN15	-0.067805	0.721167	-0.549753	0.00740835	-0.331141	0.13276		ENSG00000142583	SLC2A5	0.0929356	0.556382	0.531232	0.00134561	0.304258	0.0965083		ENSG00000116678	LEPR	-0.0113781	0.97589	0.408878	0.0725694	0.446096	0.0499592
ENSG00000103343	ZNF174	-0.0202827	0.944387	-0.386217	0.0475158	-0.313093	0.123628		ENSG00000143167	GPA33	0.0802287	0.635674	1.04578	0.00479308	0.362428	0.135194		ENSG00000116711	PLA2G4A	0.0747278	0.700598	1.04248	0.00175682	0.490235	0.0596953
ENSG00000103512	NOMO1	-0.0259421	0.919366	-0.548964	0.00484638	-0.44697	0.0274135		ENSG00000143333	RGS16	3.00487	2.50179e-33	2.60554	2.84802e-25	-0.263682	0.282053		ENSG00000116741	RGS2	0.151343	0.41216	1.11872	0.000627898	0.412282	0.112869
ENSG00000103876	FAH	0.086693	0.622585	-0.581704	0.004151	-0.851206	3.26548e-05		ENSG00000143409	MINDY1	0.169897	0.371624	0.534484	0.0402038	0.121769	0.689595		ENSG00000116774	OLFML3	-0.017246	0.962624	0.880874	0.00110715	0.938528	0.000556591
ENSG00000103995	CEP152	-0.0893522	0.589561	-0.520947	0.00384283	-0.288319	0.147882		ENSG00000143494	VASH2	0.0910111	0.620314	0.579357	0.0363586	0.225548	0.410615		ENSG00000116791	CRYZ	0.0827443	0.6581	0.76639	0.00980226	0.34072	0.190492
ENSG00000104290	FZD3	0.476811	0.0273176	0.0839583	0.765765	-0.427062	0.0415232		ENSG00000143578	CREB3L4	0.0775909	0.691014	0.54213	0.0439286	0.241658	0.378501		ENSG00000116954	RRAGC	0.023714	0.936393	0.726076	0.00527054	0.568675	0.0244338
ENSG00000104356	POP1	-0.101252	0.564211	-0.54692	0.00901274	-0.26704	0.249467		ENSG00000144036	EXOC6B	0.525124	0.0293239	0.17983	0.503531	-0.366767	0.117175		ENSG00000117151	CTBS	0.0547263	0.782177	0.634673	0.00137433	0.439814	0.0340519
ENSG00000104522	GFUS	0.0523063	0.808964	-0.507148	0.0402699	-0.718023	0.00447841		ENSG00000144320	LNPK	0.784932	4.71598e-07	1.19264	4.41091e-16	0.338746	0.0467666		ENSG00000117226	GBP3	-0.0306184	0.907899	0.474682	0.0594409	0.59698	0.0177194
ENSG00000104524	PYCR3	-0.0401074	0.862948	-0.503724	0.0445057	-0.330104	0.196713		ENSG00000144560	VGLL4	0.837567	0.00427254	0.283423	0.280732	-0.413814	0.0987221		ENSG00000117335	CD46	0.0214259	0.936673	0.850156	4.87092e-07	0.75584	1.76598e-05
ENSG00000104695	PPP2CB	0.0697459	0.674892	-0.188052	0.327834	-0.363518	0.0377097		ENSG00000144619	CNTN4	0.351671	0.103506	0.654741	0.00310392	0.143527	0.595603		ENSG00000117525	F3	0.0952894	0.614944	0.818321	0.00257045	0.409448	0.110042
ENSG00000104835	SARS2	0.0239073	0.934585	-0.919023	0.000174571	-1.01724	4.52476e-05		ENSG00000145331	TRMT10A	0.0713855	0.700225	0.447364	0.030721	0.233465	0.308648		ENSG00000117528	ABCD3	-0.0343615	0.880667	0.475702	0.0148297	0.590412	0.00278132
ENSG00000104889	RNASEH2A	0.129505	0.440163	-0.379026	0.0615733	-0.681328	0.000522889		ENSG00000145348	TBCK	0.697724	0.0105652	0.812151	0.00111105	0.0608797	0.853466		ENSG00000117614	SYF2	0.0307892	0.894148	0.39218	0.0239644	0.294373	0.111315
ENSG00000104969	SGTA	0.0129227	0.971817	-0.469987	0.051799	-0.514137	0.0325698		ENSG00000145416	MARCHF1	1.21058	0.000247157	2.61061	2.41753e-16	0.82994	0.00147087		ENSG00000118292	C1orf54	-0.0250662	0.928374	0.4128	0.0930191	0.507266	0.0367261
ENSG00000104972	LILRB1	0.0257649	0.927337	-0.471059	0.0670824	-0.571901	0.0252094		ENSG00000145703	IQGAP2	0.206573	0.287229	1.03606	5.07552e-05	0.4496	0.0622776		ENSG00000118564	FBXL5	-0.019467	0.950886	0.369686	0.0825015	0.435339	0.0396118
ENSG00000104976	SNAPC2	0.0434961	0.843601	-0.597229	0.0119115	-0.777673	0.00152167		ENSG00000145730	PAM	0.0830697	0.661816	0.666563	0.00643223	0.358901	0.149878		ENSG00000118855	MFSD1	-0.00781159	0.984188	0.484851	0.0108265	0.506754	0.00927456
ENSG00000105053	VRK3	0.126313	0.482419	-0.19192	0.461148	-0.499027	0.0281617		ENSG00000145817	YIPF5	0.400656	0.0448309	0.589542	0.00156323	0.10548	0.671393		ENSG00000118898	PPL	0.146424	0.416563	1.8975	7.10195e-06	0.685898	0.0123515
ENSG00000105146	AURKC	0.0400235	0.859115	-0.536736	0.0517904	-0.725061	0.00974224		ENSG00000146085	MMUT	0.231582	0.1857	0.413528	0.0298753	0.0500606	0.855644		ENSG00000118961	LDAH	-0.40763	0.0907177	0.136655	0.654209	0.720925	0.00542317
ENSG00000105173	CCNE1	-0.0635998	0.739497	-0.634344	0.00134955	-0.420123	0.0444677		ENSG00000146833	TRIM4	0.120921	0.465132	0.540657	0.00408251	0.256054	0.224623		ENSG00000118985	ELL2	0.0712118	0.713413	0.596993	0.00762141	0.34846	0.138781
ENSG00000105197	TIMM50	0.0153789	0.963065	-0.852237	4.49389e-07	-0.900913	2.79488e-07		ENSG00000147145	LPAR4	0.0285299	0.915329	0.698985	0.00175943	0.557233	0.0142134		ENSG00000119314	PTBP3	0.0793026	0.625898	0.431116	0.0109266	0.231261	0.224297
ENSG00000105202	FBL	0.0597718	0.745912	-0.38526	0.0374107	-0.55516	0.00227821		ENSG00000147155	EBP	0.230457	0.201336	0.695708	0.000230921	0.288588	0.175642		ENSG00000119328	ABITRAM	-0.0111512	0.978432	0.497242	0.0593059	0.530052	0.0410376
ENSG00000105258	POLR2I	0.0504554	0.811968	-0.326397	0.171163	-0.497853	0.0302916		ENSG00000147383	NSDHL	0.730579	0.00103186	0.273241	0.221611	-0.392699	0.0665		ENSG00000119655	NPC2	0.029451	0.90267	0.829837	5.91521e-07	0.711386	4.2249e-05
ENSG00000105325	FZR1	0.0727548	0.707788	-0.359931	0.136955	-0.59773	0.0112988		ENSG00000147400	CETN2	0.0726431	0.694368	0.533401	0.00888836	0.307809	0.163359		ENSG00000119711	ALDH6A1	0.0838071	0.637701	0.715468	0.000408237	0.443645	0.0363755
ENSG00000105401	CDC37	0.0795758	0.656751	-0.518848	0.0104831	-0.763833	0.000187889		ENSG00000147471	PLPBP	0.0895132	0.582473	0.444141	0.0105775	0.22419	0.255968		ENSG00000119723	COQ6	0.0528771	0.770599	0.617706	0.031182	0.266146	0.242522
ENSG00000105486	LIG1	-0.219746	0.221458	-0.636533	0.000939535	-0.244605	0.267561		ENSG00000147655	RSPO2	2.70535	6.45977e-12	0.273145	0.318846	-1.82372	2.10096e-07		ENSG00000119772	DNMT3A	-0.0327259	0.888321	0.477189	0.0113771	0.584326	0.00223094
ENSG00000105538	RASIP1	0.0430049	0.840622	-0.374911	0.149821	-0.547035	0.0333734		ENSG00000147852	VLDLR	0.293321	0.0697229	0.464716	0.00312583	0.086847	0.68703		ENSG00000119801	YPEL5	-0.0666146	0.713413	0.672327	0.000202313	0.88422	1.83696e-06
ENSG00000105576	TNPO2	-0.426852	0.0321182	-1.01983	1.70197e-08	-0.436955	0.0256191		ENSG00000147872	PLIN2	1.25907	2.51476e-12	0.565285	0.00163527	-0.531317	0.00444063		ENSG00000120526	NUDCD1	-0.00463145	0.993641	0.531328	0.0299981	0.536644	0.0285525
ENSG00000105607	GCDH	-0.028023	0.919284	-0.571959	0.0292425	-0.418823	0.104342		ENSG00000148481	MINDY3	0.137436	0.439835	0.492935	0.0245456	0.168105	0.51558		ENSG00000120860	WASHC3	-0.0671984	0.73074	0.244516	0.312451	0.450167	0.0455116
ENSG00000105676	ARMC6	-0.0476615	0.808099	-0.397721	0.0299231	-0.253402	0.201973		ENSG00000148926	ADM	6.19357	3.31847e-15	4.47203	6.90553e-09	-0.352978	0.121884		ENSG00000120963	ZNF706	-0.0714834	0.708394	0.358894	0.119374	0.585296	0.00931167
ENSG00000105677	TMEM147	0.0676126	0.721384	-0.445634	0.0327716	-0.657283	0.00158943		ENSG00000149084	HSD17B12	0.0554193	0.784881	0.493276	0.0247101	0.299552	0.19882		ENSG00000121039	RDH10	-0.388365	0.0997475	0.106143	0.739991	0.659831	0.00966818
ENSG00000105705	SUGP1	-0.0100743	0.979186	-0.496803	0.0212973	-0.447625	0.0419339		ENSG00000149257	SERPINH1	0.839005	4.37708e-05	0.443629	0.0269252	-0.313225	0.138917		ENSG00000121060	TRIM25	-0.110525	0.516792	0.217411	0.335728	0.4836	0.0178282
ENSG00000105722	ERF	-0.0168458	0.958117	-0.482939	0.0152428	-0.414235	0.0443654		ENSG00000149346	SLX4IP	0.355488	0.108251	0.563551	0.0145685	0.059931	0.851462		ENSG00000121104	FAM117A	-0.0995358	0.589561	0.320203	0.233227	0.668848	0.0138903
ENSG00000105723	GSK3A	-0.0195814	0.950886	-0.421752	0.0439949	-0.344603	0.112508		ENSG00000149485	FADS1	0.193527	0.274297	0.623002	0.00179454	0.244153	0.283132		ENSG00000121690	DEPDC7	-0.0970794	0.591381	0.287384	0.288785	0.621554	0.0209417
ENSG00000105732	ZNF574	0.208304	0.284401	-0.220733	0.412721	-0.648695	0.00811414		ENSG00000149564	ESAM	1.07683	0.000946926	1.62098	5.05592e-07	0.245458	0.361143		ENSG00000121691	CAT	-0.0163259	0.962624	0.526802	0.00926484	0.581935	0.0049675
ENSG00000105854	PON2	-0.0716573	0.661627	-0.3573	0.034857	-0.177273	0.363699		ENSG00000149809	TM7SF2	0.596291	0.00445187	1.69219	1.82245e-18	0.835601	1.21061e-05		ENSG00000122025	FLT3	0.148352	0.401101	0.998085	1.62246e-06	0.569421	0.00740967
ENSG00000106012	IQCE	-0.00109506	0.999293	-0.452619	0.0311244	-0.440888	0.0384983		ENSG00000149925	ALDOA	0.493522	0.0200077	0.713995	0.000218121	0.148307	0.544667		ENSG00000122042	UBL3	0.0398298	0.838153	0.354671	0.0326839	0.23948	0.183374
ENSG00000106077	ABHD11	-0.291226	0.156131	-0.759602	0.000527439	-0.260821	0.284622		ENSG00000150593	PDCD4	0.0722908	0.705589	0.477124	0.0330809	0.245832	0.315233		ENSG00000122378	PRXL2A	0.132433	0.410846	0.825645	1.48994e-06	0.503725	0.00667
ENSG00000106153	CHCHD2	0.0783867	0.653473	-0.29603	0.152287	-0.509282	0.00974224		ENSG00000151151	IPMK	0.253972	0.20723	0.613185	0.00681911	0.160399	0.552032		ENSG00000123179	EBPL	-0.0219074	0.944712	0.724209	0.00990678	0.811869	0.00418145
ENSG00000106211	HSPB1	0.312587	0.0991805	-0.0801094	0.765064	-0.499464	0.0105267		ENSG00000151882	CCL28	0.290771	0.162879	0.526285	0.0208665	0.069296	0.822333		ENSG00000123607	TTC21B	0.184407	0.341462	0.60066	0.0243371	0.14754	0.61956
ENSG00000106246	PTCD1	-0.0987502	0.585504	-0.535619	0.0171018	-0.248384	0.31649		ENSG00000152256	PDK1	0.947853	0.000668148	0.914427	0.000226649	0.00342073	0.993461		ENSG00000123689	G0S2	0.00426184	0.994152	0.634482	0.0238892	0.557199	0.0345963
ENSG00000106266	SNX8	-0.0349546	0.880667	-0.483477	0.0207428	-0.352168	0.108877		ENSG00000152503	TRIM36	0.812558	0.000577504	0.767929	0.000294473	-0.015232	0.962128		ENSG00000123739	PLA2G12A	-0.00706276	0.987042	0.435507	0.0548476	0.455223	0.0448668
ENSG00000106459	NRF1	-0.078312	0.669997	-0.526713	0.0152492	-0.282192	0.232075		ENSG00000152904	GGPS1	0.0960243	0.550814	0.461708	0.00914073	0.227708	0.25865		ENSG00000123908	AGO2	-0.0346719	0.874288	0.297689	0.119354	0.403116	0.0304516
ENSG00000106462	EZH2	-0.141656	0.371241	-0.790022	1.48994e-06	-0.47362	0.00850147		ENSG00000152932	RAB3C	0.117009	0.529578	0.597306	0.0220083	0.229038	0.404298		ENSG00000124107	SLPI	0.117881	0.49748	1.2976	4.10188e-10	0.854637	3.24166e-05
ENSG00000106608	URGCP	-0.0227908	0.93663	-0.97833	1.2588e-05	-0.826331	0.000249948		ENSG00000152952	PLOD2	0.87855	0.00226794	1.21797	9.75682e-06	0.179241	0.519429		ENSG00000124356	STAMBP	-0.0369684	0.880487	0.518679	0.0419217	0.675189	0.00905097
ENSG00000107130	NCS1	0.0566835	0.776093	-0.669934	0.00142706	-0.879237	4.12764e-05		ENSG00000153774	CFDP1	0.360289	0.0998967	0.807703	0.000340961	0.245491	0.322417		ENSG00000124491	F13A1	0.195176	0.312134	2.64281	2.43503e-11	1.39295	3.05029e-05
ENSG00000107249	GLIS3	-0.0266479	0.919284	-0.810388	0.0125169	-0.46108	0.0543819		ENSG00000154102	C16orf74	0.672166	0.00406053	1.57834	1.9693e-12	0.600529	0.00538602		ENSG00000124785	NRN1	0.19279	0.318644	0.590419	0.0153051	0.165957	0.555974
ENSG00000107282	APBA1	0.00692766	0.987775	-0.666971	0.00790644	-0.676343	0.00754397		ENSG00000154153	RETREG1	0.322828	0.132101	0.483881	0.0332568	0.0185411	0.955694		ENSG00000124786	SLC35B3	-0.0380875	0.875543	0.51086	0.0535481	0.678314	0.0112231
ENSG00000107404	DVL1	0.0206974	0.94586	-0.381856	0.0820869	-0.452989	0.0376401		ENSG00000154310	TNIK	1.0389	2.46223e-06	0.914366	8.55669e-06	-0.0614513	0.834499		ENSG00000125355	TMEM255A	-0.046499	0.831603	0.511119	0.0587343	0.723391	0.00942208
ENSG00000107672	NSMCE4A	-0.209819	0.279798	-0.517881	0.0313542	-0.101281	0.737387		ENSG00000155660	PDIA4	0.207592	0.20748	0.722342	1.07195e-05	0.358117	0.0506869		ENSG00000125730	C3	-0.00891153	0.98343	2.14612	3.01365e-08	1.96734	7.16519e-08
ENSG00000107719	PALD1	-0.0219691	0.940917	-0.864941	0.00903395	-0.532568	0.0347278		ENSG00000155760	FZD7	0.168741	0.371241	0.556418	0.0375365	0.12768	0.674162		ENSG00000125744	RTN2	-0.225633	0.259852	0.10407	0.741882	0.526777	0.0325698
ENSG00000107815	TWNK	-0.781071	0.00119957	-0.549041	0.0113845	0.163946	0.534721		ENSG00000155975	VPS37A	0.387352	0.0376076	0.451662	0.0113004	0.00186359	0.994653		ENSG00000126709	IFI6	0.0190719	0.950886	1.35359	1.42449e-13	1.22076	4.056e-11
ENSG00000107937	GTPBP4	-0.17868	0.257762	-0.423833	0.0128118	-0.115646	0.598155		ENSG00000156273	BACH1	0.177807	0.319018	0.835197	3.68858e-05	0.422046	0.0474761		ENSG00000126759	CFP	0.0229815	0.938501	1.48859	1.92994e-06	1.14623	5.01089e-05
ENSG00000107954	NEURL1	0.0674818	0.737907	-0.557247	0.0205426	-0.819618	0.00103701		ENSG00000156587	UBE2L6	0.0938552	0.591122	0.42582	0.0437394	0.17395	0.477814		ENSG00000126803	HSPA2	-0.0529954	0.801152	0.303209	0.204347	0.4801	0.0364115
ENSG00000108344	PSMD3	-0.127413	0.419971	-0.487444	0.00581086	-0.213319	0.297024		ENSG00000158373	H2BC5	0.868609	0.0124791	2.06865	1.02829e-06	0.374819	0.151294		ENSG00000126858	RHOT1	0.0429354	0.835729	0.422018	0.035485	0.278225	0.194533
ENSG00000108479	GALK1	0.0216917	0.941113	-0.483694	0.0257445	-0.560413	0.0100785		ENSG00000159167	STC1	6.49128	1.60996e-26	4.94236	5.4694e-16	-0.863471	0.00209768		ENSG00000126860	EVI2A	0.00490622	0.993596	1.77011	1.86747e-06	1.47675	1.03958e-05
ENSG00000108528	SLC25A11	0.0150906	0.963604	-0.532443	0.00795618	-0.582411	0.0045728		ENSG00000159335	PTMS	0.171792	0.371241	0.640993	0.0149845	0.192863	0.495422		ENSG00000127870	RNF6	-0.11386	0.486388	0.193796	0.359869	0.449234	0.0175411
ENSG00000108578	BLMH	-0.0416581	0.831652	-0.40785	0.0169692	-0.282577	0.125998		ENSG00000159388	BTG2	0.0905664	0.628763	0.643503	0.00774223	0.329988	0.18689		ENSG00000127947	PTPN12	-0.00206107	0.997363	0.559196	0.000322505	0.560621	0.000542352
ENSG00000108591	DRG2	0.040304	0.862948	-0.483074	0.0708357	-0.65762	0.0148954		ENSG00000159674	SPON2	0.135802	0.465626	0.653716	0.0131959	0.239492	0.38215		ENSG00000128016	ZFP36	-0.0938686	0.615759	0.403448	0.097066	0.706057	0.00396087
ENSG00000108604	SMARCD2	0.00543304	0.990007	-0.520972	0.00242746	-0.533804	0.0026093		ENSG00000159733	ZFYVE28	0.0929433	0.595728	0.763483	0.0127156	0.290375	0.259807		ENSG00000128340	RAC2	0.00383319	0.994675	0.579198	0.00727768	0.550919	0.0125683
ENSG00000108639	SYNGR2	-0.0192237	0.950886	-0.469168	0.0233669	-0.39071	0.0666429		ENSG00000160285	LSS	0.269027	0.197304	1.37563	8.20445e-07	0.575668	0.0182813		ENSG00000128463	EMC4	0.0479645	0.821291	0.544525	0.048716	0.294912	0.2542
ENSG00000108773	KAT2A	0.0303608	0.905065	-0.438112	0.0469055	-0.545911	0.01284		ENSG00000160310	PRMT2	0.343573	0.0539429	0.621494	0.000174082	0.185353	0.364314		ENSG00000128590	DNAJB9	-0.0601827	0.772326	0.312257	0.222336	0.521198	0.0342483
ENSG00000108784	NAGLU	-0.0528139	0.802902	-0.472795	0.0406023	-0.281513	0.252745		ENSG00000160326	SLC2A6	0.0585838	0.776639	0.645471	0.00653166	0.405403	0.0938512		ENSG00000128604	IRF5	-0.03779	0.865761	0.406331	0.0553403	0.534149	0.0107288
ENSG00000108788	MLX	-0.00292845	0.995468	-0.425692	0.0416463	-0.408013	0.0546018		ENSG00000160593	JAML	2.02373	0.000101966	0.69401	0.0187919	-0.335807	0.194226		ENSG00000128789	PSMG2	-0.27303	0.164041	0.0231928	0.941228	0.431237	0.0462203
ENSG00000108826	MRPL27	0.053692	0.789033	-0.378742	0.077904	-0.551842	0.00905946		ENSG00000161929	SCIMP	0.631398	0.0291933	0.386971	0.143212	-0.223319	0.421898		ENSG00000129596	CDO1	-0.0191914	0.953601	0.4832	0.0605308	0.5552	0.0301002
ENSG00000108829	LRRC59	-0.00924843	0.98117	-0.487372	0.0121109	-0.44641	0.0258404		ENSG00000162373	BEND5	1.22896	0.00330716	0.991281	0.00298126	-0.0475639	0.889332		ENSG00000129636	ITFG1	-0.00651335	0.987775	0.421002	0.0321298	0.438789	0.0271184
ENSG00000108852	MPP2	0.0713837	0.722318	-0.269399	0.326459	-0.519292	0.0472062		ENSG00000162433	AK4	0.965139	8.84448e-09	1.22405	4.60592e-14	0.203489	0.30994		ENSG00000129657	SEC14L1	-0.0371709	0.875543	0.444589	0.0598046	0.584011	0.0130833
ENSG00000109099	PMP22	0.309584	0.161858	-0.177379	0.554807	-0.739092	0.00692136		ENSG00000162496	DHRS3	2.57317	4.19542e-16	2.25083	9.22296e-13	-0.174317	0.538506		ENSG00000129993	CBFA2T3	-0.589565	0.00545328	-0.244916	0.259762	0.325506	0.122899
ENSG00000109339	MAPK10	0.152062	0.403734	-0.20741	0.465477	-0.621303	0.0209659		ENSG00000162600	OMA1	0.621438	0.0189863	0.806877	0.0011574	0.0917151	0.766112		ENSG00000130312	MRPL34	-0.0531161	0.806956	0.450283	0.0746388	0.660509	0.00971333
ENSG00000109519	GRPEL1	0.110455	0.471112	-0.14266	0.489801	-0.377045	0.0306811		ENSG00000162636	FAM102B	0.285632	0.177743	0.534213	0.0284903	0.0600064	0.856163		ENSG00000130402	ACTN4	-0.0948732	0.552062	0.219127	0.263304	0.441559	0.0140164
ENSG00000109920	FNBP4	-0.254781	0.19472	-0.440343	0.0481391	-0.0275521	0.93272		ENSG00000162729	IGSF8	0.10061	0.583411	0.750117	0.00109499	0.411639	0.0784856		ENSG00000130584	ZBTB46	-0.0355591	0.884872	0.417458	0.0897998	0.553304	0.0231285
ENSG00000110047	EHD1	-0.00447681	0.993596	-0.383375	0.0424165	-0.363667	0.0588766		ENSG00000162777	DENND2D	0.76079	0.000632066	0.831397	3.63259e-05	0.0654649	0.820191		ENSG00000130592	LSP1	0.0444571	0.835969	2.08459	1.48446e-05	1.05941	0.00115238
ENSG00000110066	KMT5B	0.0226115	0.934585	-0.355049	0.0816413	-0.429205	0.0334895		ENSG00000162817	C1orf115	0.901737	0.00399113	0.311338	0.239004	-0.402205	0.115183		ENSG00000130775	THEMIS2	-0.287531	0.175424	0.0754424	0.819482	0.53465	0.027173
ENSG00000110074	FOXRED1	-0.0434693	0.833698	-0.564017	0.00411102	-0.408014	0.0484427		ENSG00000162999	DUSP19	0.87616	0.000482045	0.531934	0.0179974	-0.233532	0.345229		ENSG00000130816	DNMT1	-0.061686	0.73074	0.22178	0.253796	0.387097	0.0325698
ENSG00000110090	CPT1A	-0.0402143	0.842606	-0.461573	0.00990678	-0.331859	0.0831902		ENSG00000163017	ACTG2	0.274302	0.135814	0.930368	0.00882272	0.0984752	0.692945		ENSG00000130958	SLC35D2	-0.0137997	0.97157	0.549347	0.0276218	0.597275	0.0168301
ENSG00000110107	PRPF19	-0.0949684	0.55506	-0.3863	0.0332182	-0.1595	0.458525		ENSG00000163110	PDLIM5	0.237713	0.192667	0.422515	0.0360941	0.0434276	0.882436		ENSG00000131469	RPL27	-0.00527928	0.992099	0.518862	0.0413509	0.525738	0.0372451
ENSG00000110200	ANAPC15	0.0550363	0.795604	-0.608146	0.0304354	-0.89538	0.00287583		ENSG00000163154	TNFAIP8L2	-0.0387188	0.871505	0.732947	0.011088	0.937071	0.00182416		ENSG00000131697	NPHP4	0.0786375	0.686781	0.615677	0.0134388	0.322208	0.205814
ENSG00000110455	ACCS	-0.0371496	0.876112	-0.60508	0.0100655	-0.436488	0.0678687		ENSG00000163162	RNF149	0.0854292	0.630112	0.548392	0.00770024	0.296324	0.185601		ENSG00000131724	IL13RA1	-0.0123524	0.97157	0.322831	0.0639889	0.359056	0.0396761
ENSG00000110619	CARS1	0.395417	0.0342183	-0.37567	0.0421691	-0.873555	5.52084e-07		ENSG00000163235	TGFA	1.77641	1.76535e-05	2.38199	1.04864e-09	0.276374	0.303443		ENSG00000131871	SELENOS	0.0533942	0.794937	0.512261	0.0167292	0.324313	0.153722
ENSG00000110717	NDUFS8	0.0299324	0.905318	-0.344022	0.113487	-0.445253	0.0362918		ENSG00000163349	HIPK1	0.0429513	0.824882	0.36346	0.0349349	0.237663	0.20279		ENSG00000131981	LGALS3	0.0572852	0.767452	0.620095	0.00130691	0.425131	0.0363772
ENSG00000110721	CHKA	-0.00693839	0.987391	-0.449096	0.0483618	-0.412256	0.0723938		ENSG00000163536	SERPINI1	0.116466	0.529578	0.519329	0.0371815	0.185213	0.509133		ENSG00000132274	TRIM22	-0.144253	0.429617	0.292192	0.281379	0.722951	0.00905097
ENSG00000110911	SLC11A2	-0.698725	0.001391	-0.492903	0.0149275	0.163686	0.507137		ENSG00000163590	PPM1L	0.0887456	0.620325	0.47785	0.0263707	0.223314	0.353173		ENSG00000132467	UTP3	-0.473657	0.0243808	-0.181147	0.436374	0.319944	0.131039
ENSG00000111142	METAP2	-0.0117588	0.973857	-0.402663	0.0348755	-0.35734	0.0685865		ENSG00000163633	C4orf36	0.82383	0.000837004	0.657094	0.00291846	-0.102444	0.718378		ENSG00000132471	WBP2	0.0387861	0.860246	0.457269	0.0311244	0.3157	0.158298
ENSG00000111196	MAGOHB	0.0457756	0.821818	-0.2881	0.174642	-0.429928	0.0338556		ENSG00000163644	PPM1K	0.259672	0.205004	0.640823	0.0063244	0.167686	0.541698		ENSG00000132510	KDM6B	-0.00239103	0.99716	0.571156	0.0400159	0.531212	0.0418006
ENSG00000111275	ALDH2	0.0132427	0.970875	-0.519627	0.00626884	-0.561432	0.0040203		ENSG00000163694	RBM47	0.0671819	0.713413	0.473388	0.0143193	0.273521	0.194533		ENSG00000132561	MATN2	0.0576687	0.775814	1.05995	2.25506e-06	0.760864	0.000659225
ENSG00000111305	GSG1	-0.0392368	0.866331	-0.763693	0.0115749	-0.453627	0.0768158		ENSG00000163872	YEATS2	0.731653	7.88875e-05	0.558942	0.0015521	-0.135458	0.548555		ENSG00000132581	SDF2	-0.0290917	0.916167	0.488094	0.0639889	0.609534	0.020648
ENSG00000111641	NOP2	-0.681325	0.0065604	-0.698567	0.00189096	-0.0088923	0.979127		ENSG00000164070	HSPA4L	0.581004	0.00253119	0.250219	0.211122	-0.312125	0.111266		ENSG00000132680	KHDC4	-0.0386688	0.871505	0.36387	0.173686	0.518762	0.0474805
ENSG00000111667	USP5	-0.0301965	0.90949	-0.491869	0.0471245	-0.355191	0.158824		ENSG00000164088	PPM1M	0.809474	0.00637775	0.402546	0.114659	-0.283033	0.282022		ENSG00000132965	ALOX5AP	0.0854563	0.648979	0.500152	0.0357285	0.229097	0.381528
ENSG00000111679	PTPN6	-0.0203405	0.946414	-0.413012	0.0460224	-0.334555	0.119501		ENSG00000164211	STARD4	0.813202	1.92931e-05	0.869657	9.00695e-07	0.0584533	0.827563		ENSG00000133106	EPSTI1	-0.151688	0.372003	0.378899	0.149142	0.977269	0.00195322
ENSG00000111834	RSPH4A	-0.24849	0.207782	-0.764412	0.0129112	-0.127356	0.651634		ENSG00000164330	EBF1	0.108312	0.550635	0.469493	0.0470404	0.169496	0.535361		ENSG00000133112	TPT1	0.0580675	0.767452	0.540204	0.00818935	0.344427	0.113659
ENSG00000112029	FBXO5	0.0227272	0.932067	-0.330408	0.0866163	-0.401918	0.034649		ENSG00000164484	TMEM200A	2.44044	1.46121e-10	2.63925	1.19704e-12	0.102119	0.743638		ENSG00000133131	MORC4	0.0545524	0.801253	0.520305	0.0442943	0.293751	0.267278
ENSG00000112118	MCM3	-0.146777	0.378865	-0.564335	0.00280501	-0.24816	0.247801		ENSG00000164654	MIOS	0.635988	0.00139794	0.423843	0.0267885	-0.184488	0.403502		ENSG00000133246	PRAM1	-0.00485141	0.993499	0.582207	0.0129511	0.588422	0.0133184
ENSG00000112144	CILK1	-0.120877	0.489997	-0.436916	0.0423958	-0.144493	0.580548		ENSG00000164938	TP53INP1	0.00082628	0.999293	0.514269	0.048716	0.489177	0.0565056		ENSG00000133872	SARAF	0.0459898	0.820183	0.803005	1.50557e-05	0.621772	0.0014773
ENSG00000112149	CD83	0.0390017	0.866073	-0.420618	0.0777055	-0.565322	0.0169027		ENSG00000164975	SNAPC3	0.682484	5.86483e-05	0.390729	0.0228928	-0.256209	0.168154		ENSG00000133935	ERG28	0.212443	0.253705	1.39225	1.59359e-10	0.793223	0.000187889
ENSG00000112218	GPR63	-0.473461	0.0491385	-0.797982	0.000695447	-0.169743	0.536453		ENSG00000165030	NFIL3	0.727824	0.00147592	0.349549	0.112781	-0.313342	0.163756		ENSG00000134028	ADAMDEC1	0.0364833	0.877213	1.31551	2.06992e-08	1.04203	5.17094e-06
ENSG00000112238	PRDM13	-0.308578	0.162879	-0.66459	0.0146384	-0.0984958	0.755423		ENSG00000165097	KDM1B	0.0538834	0.805171	0.53148	0.035597	0.31058	0.231018		ENSG00000134056	MRPS36	0.00566205	0.990723	0.55115	0.026798	0.506512	0.041085
ENSG00000112245	PTP4A1	0.0196671	0.950139	-0.55192	0.00333073	-0.617293	0.00137367		ENSG00000165195	PIGA	0.162072	0.368797	0.592442	0.00499672	0.233104	0.32617		ENSG00000134061	CD180	0.0332104	0.898089	0.769201	0.0062663	0.532556	0.040485
ENSG00000112312	GMNN	0.033358	0.885438	-0.337418	0.099565	-0.445004	0.0262368		ENSG00000165240	ATP7A	0.154094	0.408708	0.88265	0.000285019	0.417894	0.0807623		ENSG00000134108	ARL8B	0.0476409	0.801765	0.368235	0.029296	0.233129	0.205814
ENSG00000112320	SOBP	0.0149511	0.967714	-0.559292	0.0335271	-0.609541	0.0198635		ENSG00000165288	BRWD3	0.351418	0.0672974	0.711668	6.89084e-05	0.240224	0.252295		ENSG00000134109	EDEM1	0.266791	0.181174	0.830056	0.000146556	0.326233	0.160536
ENSG00000112365	ZBTB24	-0.28811	0.104399	-0.647628	0.000182119	-0.232337	0.256299		ENSG00000165416	SUGT1	0.347774	0.0450498	0.318964	0.0707993	-0.0910921	0.685192		ENSG00000134198	TSPAN2	0.0738792	0.702268	0.860736	0.000182703	0.548978	0.0167959
ENSG00000112473	SLC39A7	-0.144161	0.388786	-0.446791	0.0205059	-0.145915	0.53797		ENSG00000166002	SMCO4	0.0836921	0.641375	0.48957	0.0198138	0.245472	0.291499		ENSG00000134250	NOTCH2	0.0153931	0.963604	0.717594	0.000190938	0.642331	0.00137184
ENSG00000112578	BYSL	-0.239474	0.175424	-0.57699	0.00169146	-0.191377	0.387687		ENSG00000166130	IKBIP	0.0379761	0.860246	0.542542	0.00488426	0.405242	0.0451074		ENSG00000134352	IL6ST	-0.036543	0.880487	0.365857	0.137392	0.500737	0.0380101
ENSG00000112695	COX7A2	0.0403042	0.835729	-0.291359	0.0918351	-0.404167	0.0161362		ENSG00000166165	CKB	0.845235	0.000661908	0.528769	0.0179179	-0.217625	0.387687		ENSG00000134419	RPS15A	0.00671578	0.987775	0.556781	0.0451467	0.445883	0.0681248
ENSG00000112701	SENP6	0.0635629	0.728146	-0.316611	0.103401	-0.494428	0.00844154		ENSG00000166340	TPP1	0.127871	0.450189	0.652898	0.000667787	0.339827	0.104287		ENSG00000134594	RAB33A	0.414244	0.0878048	1.18428	4.69544e-05	0.340777	0.183413
ENSG00000112773	TENT5A	0.280687	0.0831162	-0.0077348	0.973915	-0.370362	0.027202		ENSG00000166501	PRKCB	0.120949	0.428764	0.381975	0.0246492	0.132498	0.527046		ENSG00000134824	FADS2	0.285656	0.172877	1.50645	1.19176e-08	0.695215	0.00358599
ENSG00000113070	HBEGF	0.0394031	0.862724	-0.319949	0.185415	-0.457372	0.0495077		ENSG00000166598	HSP90B1	0.185517	0.264081	0.476165	0.00897687	0.14433	0.525446		ENSG00000134864	GGACT	-0.049778	0.81401	0.309792	0.196506	0.478632	0.0380101
ENSG00000113211	PCDHB6	-0.193613	0.320515	-0.742688	0.00642036	-0.230724	0.403502		ENSG00000166946	CCNDBP1	0.072877	0.671858	0.467258	0.00954027	0.266473	0.181762		ENSG00000134954	ETS1	0.045133	0.831558	0.700403	0.000934702	0.512318	0.0186896
ENSG00000113240	CLK4	0.0529222	0.797201	-0.372284	0.0973978	-0.547078	0.012674		ENSG00000167460	TPM4	0.699728	8.69275e-05	0.0652295	0.794875	-0.6038	0.000542352		ENSG00000134970	TMED7	-0.00845524	0.98361	0.562753	0.00705542	0.587051	0.0060739
ENSG00000113296	THBS4	-0.15985	0.400925	-0.681544	0.00999819	-0.232443	0.39853		ENSG00000167508	MVD	0.642479	0.007735	0.608192	0.00525629	-0.0350879	0.911739		ENSG00000134996	OSTF1	0.00319884	0.995239	0.537479	0.0242667	0.508554	0.0335472
ENSG00000113369	ARRDC3	0.986121	0.000299832	-0.258046	0.312749	-1.34752	2.68586e-07		ENSG00000167552	TUBA1A	1.06657	7.75689e-06	1.52004	6.9885e-11	0.277038	0.243054		ENSG00000135241	PNPLA8	-0.00475869	0.993405	0.546021	0.00625795	0.555736	0.00667604
ENSG00000113494	PRLR	-0.275092	0.186412	-0.871679	0.000403668	-0.308198	0.220588		ENSG00000167851	CD300A	2.06543	3.21282e-06	3.14229	8.36624e-14	0.465014	0.073373		ENSG00000135297	MTO1	-0.451743	0.0182149	-0.182	0.390118	0.295756	0.133006
ENSG00000113552	GNPDA1	0.0573605	0.780213	-0.281734	0.252855	-0.471358	0.0436534		ENSG00000168209	DDIT4	1.76414	0.00253119	1.63088	0.0012283	-0.0109556	0.971862		ENSG00000135363	LMO2	-0.041475	0.849383	0.302843	0.190678	0.442832	0.0467666
ENSG00000113643	RARS1	0.0807534	0.630034	-0.185052	0.380264	-0.38932	0.0391476		ENSG00000168675	LDLRAD4	0.092688	0.618545	0.785636	0.0010437	0.439802	0.064835		ENSG00000135378	PRRG4	0.033466	0.880719	0.489767	0.00621118	0.376148	0.0464552
ENSG00000113645	WWC1	-0.0253436	0.927339	-0.590259	0.0128118	-0.464606	0.0531127		ENSG00000168779	SHOX2	0.632577	0.000828711	0.147534	0.508866	-0.455851	0.0138095		ENSG00000135535	CD164	-0.00145966	0.999028	0.660282	4.95046e-05	0.658125	9.57974e-05
ENSG00000113758	DBN1	-0.0652884	0.750575	-0.594953	0.0155021	-0.339922	0.179452		ENSG00000169136	ATF5	1.67892	6.22234e-16	0.688779	0.000449446	-0.693117	0.000621613		ENSG00000135776	ABCB10	-0.00762869	0.986488	0.810704	0.0026175	0.808856	0.00254041
ENSG00000113761	ZNF346	-0.0307514	0.906237	-0.862315	0.000566801	-0.663195	0.00701122		ENSG00000169252	ADRB2	0.766998	0.00120447	1.02377	2.43729e-06	0.182436	0.468779		ENSG00000135899	SP110	-0.15722	0.393312	0.269792	0.268489	0.631605	0.00604798
ENSG00000113924	HGD	0.0324618	0.902694	-0.514547	0.0496738	-0.652237	0.0133482		ENSG00000169413	RNASE6	0.307831	0.160364	0.649187	0.00859307	0.12765	0.664994		ENSG00000135916	ITM2C	-0.00593242	0.989473	0.777836	0.000832365	0.783421	0.00101089
ENSG00000114030	KPNA1	-0.321057	0.0640914	-0.501041	0.00268351	-0.0937205	0.680359		ENSG00000169442	CD52	0.1544	0.404926	0.819387	0.00054678	0.381647	0.112577		ENSG00000135926	TMBIM1	-0.0302702	0.905065	0.380707	0.0813278	0.48534	0.0244338
ENSG00000114054	PCCB	-0.0444091	0.834068	-0.468193	0.0298753	-0.30834	0.178098		ENSG00000169499	PLEKHA2	0.730984	1.80699e-05	0.338247	0.0586564	-0.346992	0.0542071		ENSG00000135932	CAB39	-0.0510926	0.81401	0.3781	0.152062	0.579601	0.0264982
ENSG00000114302	PRKAR2A	0.0319628	0.890352	-0.352729	0.0613182	-0.451542	0.0148954		ENSG00000169508	GPR183	0.829565	7.6443e-05	0.638561	0.00111374	-0.132855	0.593072		ENSG00000136021	SCYL2	-0.0530283	0.778681	0.222193	0.266368	0.372108	0.0467295
ENSG00000114767	RRP9	0.0268903	0.920814	-0.630429	0.00821038	-0.741305	0.00244344		ENSG00000169519	METTL15	0.474831	0.0229089	0.222565	0.314779	-0.278095	0.193177		ENSG00000136048	DRAM1	0.0113679	0.974998	0.979948	5.3324e-08	0.910341	1.1613e-06
ENSG00000115234	SNX17	0.053127	0.785139	-0.347827	0.0850607	-0.508805	0.00977061		ENSG00000169609	C15orf40	0.0992861	0.583485	0.481801	0.0314045	0.203209	0.423468		ENSG00000136068	FLNB	0.0888429	0.630112	0.568961	0.0131363	0.286444	0.245583
ENSG00000115268	RPS15	0.104511	0.578163	-0.294256	0.2566	-0.606491	0.0146926		ENSG00000169756	LIMS1	0.170203	0.313025	0.532479	0.00463115	0.200342	0.365245		ENSG00000136205	TNS3	-0.0133677	0.970563	0.557572	0.00321724	0.600087	0.00199765
ENSG00000115295	CLIP4	0.0781687	0.673545	-0.391207	0.0873584	-0.634952	0.00484726		ENSG00000170379	TCAF2	1.05585	0.0113369	1.65322	NA	0.0365805	NA		ENSG00000136286	MYO1G	-0.00854994	0.983714	0.621665	0.0118254	0.642394	0.00991696
ENSG00000115307	AUP1	0.0126471	0.97157	-0.40596	0.0443006	-0.446121	0.027454		ENSG00000170412	GPRC5C	1.73874	5.66047e-11	0.962067	4.85131e-05	-0.40767	0.082093		ENSG00000136315	RNASE2CP	0.0315009	0.898465	0.746019	0.000308638	0.599997	0.00509049
ENSG00000115507	OTX1	-0.0500889	0.796389	-0.375361	0.0439949	-0.225677	0.272025		ENSG00000170949	ZNF160	0.87746	0.00028877	0.945611	1.73599e-05	0.0629284	0.835603		ENSG00000136436	CALCOCO2	0.0377199	0.86884	0.528533	0.0140406	0.380775	0.090135
ENSG00000115526	CHST10	-0.123006	0.486812	-0.53229	0.0133487	-0.221206	0.36734		ENSG00000170955	CAVIN3	0.972468	0.000668148	0.578773	0.0169076	-0.224313	0.39853		ENSG00000136450	SRSF1	-0.0746829	0.705251	0.462143	0.0617611	0.737886	0.00352426
ENSG00000115568	ZNF142	-0.0197254	0.950886	-0.459512	0.0485257	-0.371418	0.118541		ENSG00000171236	LRG1	0.230882	0.210767	0.442257	0.0316975	0.060516	0.83422		ENSG00000136819	C9orf78	-0.00101439	0.999293	0.61008	0.00352783	0.602412	0.00504971
ENSG00000115641	FHL2	0.777086	0.000185066	-0.151363	0.537576	-0.941489	1.83696e-06		ENSG00000171246	NPTX1	0.399416	0.0966874	0.838243	0.00250546	0.162731	0.577204		ENSG00000136869	TLR4	-0.185175	0.295644	0.273174	0.21439	0.635927	0.00206678
ENSG00000115649	CNPPD1	-0.0158599	0.963604	-0.723623	0.00228813	-0.622587	0.00915909		ENSG00000171388	APLN	2.12949	2.68049e-13	0.892568	0.000416332	-0.682437	0.00515724		ENSG00000136897	MRPL50	-0.102699	0.55188	0.233235	0.309946	0.495095	0.0189646
ENSG00000115738	ID2	0.124969	0.429029	-0.184742	0.3694	-0.446939	0.014116		ENSG00000171497	PPID	0.763228	0.000228334	0.311537	0.13756	-0.384383	0.0591928		ENSG00000136997	MYC	0.00164031	0.999028	0.616062	0.0188536	0.577806	0.025178
ENSG00000115902	SLC1A4	0.424738	0.0649731	-0.0539196	0.871485	-0.576285	0.0114823		ENSG00000171509	RXFP1	0.190551	0.326493	0.515467	0.0375365	0.10601	0.728286		ENSG00000137075	RNF38	0.0246177	0.925749	0.519667	0.0086069	0.422197	0.0402191
ENSG00000115946	PNO1	-0.121626	0.461344	-0.43415	0.0245748	-0.158977	0.492825		ENSG00000171604	CXXC5	0.185905	0.266192	0.45558	0.0143298	0.122876	0.604884		ENSG00000137207	YIPF3	0.0350603	0.873771	0.38853	0.0360941	0.2749	0.165067
ENSG00000116016	EPAS1	-0.423738	0.0503315	-0.729995	0.000349053	-0.185475	0.449831		ENSG00000171611	PTCRA	0.012105	0.975076	1.16516	0.00115198	0.838736	0.00430016		ENSG00000137275	RIPK1	-0.446129	0.0681028	-0.04152	0.906866	0.493118	0.0440352
ENSG00000116120	FARSB	-0.042101	0.848961	-0.70495	0.00194873	-0.51219	0.0263552		ENSG00000171729	TMEM51	1.26491	1.37061e-06	0.732477	0.00140177	-0.286579	0.242705		ENSG00000137414	FAM8A1	-0.054771	0.794937	0.349585	0.148213	0.539278	0.0221321
ENSG00000116221	MRPL37	0.0483808	0.81401	-0.375414	0.0875353	-0.536409	0.0128787		ENSG00000171766	GATM	0.673772	0.000178343	0.718005	1.27485e-05	0.047158	0.856325		ENSG00000137563	GGH	-0.032355	0.902839	0.570861	0.0263058	0.711835	0.00654911
ENSG00000116260	QSOX1	0.0698386	0.71736	-0.437775	0.0524153	-0.668459	0.00291252		ENSG00000172164	SNTB1	0.558645	0.00912007	0.996452	1.9168e-07	0.323817	0.124232		ENSG00000137575	SDCBP	-5.80857e-05	0.999997	0.53973	0.0451467	0.432426	0.0508096
ENSG00000116288	PARK7	0.0658476	0.713735	-0.25161	0.213194	-0.432622	0.0227644		ENSG00000172349	IL16	0.372354	0.112618	0.974995	0.00229547	0.182303	0.524448		ENSG00000137642	SORL1	-0.015335	0.963604	0.814703	8.39454e-06	0.865843	4.79635e-06
ENSG00000116353	MECR	-0.0424373	0.849259	-0.669179	0.00479881	-0.473008	0.0477074		ENSG00000172493	AFF1	0.856038	0.000159625	0.770705	0.000191099	-0.0425295	0.889944		ENSG00000137819	PAQR5	0.0416598	0.853104	0.601253	0.0321298	0.357429	0.166638
ENSG00000116521	SCAMP3	0.00457081	0.993596	-0.524854	0.0099116	-0.533904	0.0103024		ENSG00000172893	DHCR7	0.787063	0.000313023	1.71895	1.11508e-16	0.660395	0.00126864		ENSG00000137845	ADAM10	0.0042554	0.994152	0.519298	0.0160489	0.491899	0.0249493
ENSG00000116649	SRM	0.0102789	0.979186	-0.605491	0.00821038	-0.637318	0.00636631		ENSG00000173110	HSPA6	1.92168	0.00248723	1.05993	NA	-0.110797	NA		ENSG00000137944	KYAT3	-0.673617	0.000595764	-0.249115	0.22125	0.382162	0.0498631
ENSG00000116670	MAD2L2	0.0108326	0.976666	-0.495124	0.0125343	-0.528396	0.00907493		ENSG00000173281	PPP1R3B	0.495176	0.0486273	0.68899	0.00482249	0.0711748	0.82535		ENSG00000137959	IFI44L	0.0207443	0.950103	0.667508	0.0218467	0.471811	0.0653734
ENSG00000116691	MIIP	0.0668691	0.739538	-0.408148	0.0933832	-0.642566	0.00796947		ENSG00000173372	C1QA	0.222862	0.257762	1.73174	2.07227e-05	0.518376	0.0476047		ENSG00000138029	HADHB	-0.01112	0.978445	0.49728	0.0554127	0.531674	0.0381548
ENSG00000116729	WLS	-0.157178	0.403916	-0.901866	0.000535147	-0.399998	0.110901		ENSG00000173451	THAP2	0.321936	0.145877	1.14871	8.07646e-06	0.43992	0.0642581		ENSG00000138375	SMARCAL1	0.0580498	0.781573	0.761095	0.00227162	0.48628	0.0467295
ENSG00000116771	AGMAT	0.00365533	0.995101	-1.13928	5.56507e-06	-1.09508	1.09669e-05		ENSG00000173727		0.861041	0.0191705	0.746374	0.0166497	-0.0584337	0.850248		ENSG00000138434	ITPRID2	0.0427489	0.830299	0.477686	0.00574704	0.343566	0.0616511
ENSG00000116786	PLEKHM2	-0.182444	0.266224	-0.540508	0.00248055	-0.206983	0.325866		ENSG00000173930	SLCO4C1	0.880821	0.00305692	1.74883	1.271e-08	0.419036	0.0917125		ENSG00000138449	SLC40A1	0.0467209	0.829893	0.860816	0.000246727	0.61844	0.008325
ENSG00000116990	MYCL	-0.0785394	0.657267	-0.514305	0.00888746	-0.286651	0.184516		ENSG00000174007	CEP19	0.350679	0.0915755	0.647271	0.00169146	0.15712	0.533961		ENSG00000138459	SLC35A5	-9.38682e-05	0.999997	0.72574	0.0129154	0.648909	0.0168301
ENSG00000117013	KCNQ4	-0.249772	0.225054	-1.5755	3.58492e-05	-0.469897	0.0707257		ENSG00000174099	MSRB3	0.447974	0.0465855	0.59919	0.00490408	0.0618701	0.837752		ENSG00000138613	APH1B	0.0159992	0.963604	0.514564	0.0284553	0.434583	0.0671372
ENSG00000117399	CDC20	-0.0138245	0.967115	-0.568051	0.00144263	-0.511482	0.00604798		ENSG00000174456	C12orf76	0.303	0.16422	0.863218	0.000944159	0.257757	0.327763		ENSG00000138614	INTS14	-0.0366759	0.880487	0.465327	0.08241	0.624503	0.0204203
ENSG00000117411	B4GALT2	-0.0757294	0.684473	-0.793462	0.000214926	-0.51139	0.0204203		ENSG00000174529	TMEM81	0.648728	0.0121382	0.324503	0.18678	-0.288175	0.245945		ENSG00000138617	PARP16	-0.00415774	0.994205	0.517408	0.0534379	0.511119	0.0498631
ENSG00000117448	AKR1A1	0.108231	0.547878	-0.179003	0.506248	-0.461186	0.0459567		ENSG00000175105	ZNF654	1.02642	9.95022e-06	1.23759	2.37238e-08	0.143335	0.586801		ENSG00000138709	LARP1B	-0.0458291	0.811816	0.265887	0.139638	0.39366	0.022784
ENSG00000117594	HSD11B1	-0.149385	0.386289	-0.989945	4.77459e-07	-0.583612	0.00444063		ENSG00000176046	NUPR1	1.63624	1.36925e-06	0.909179	0.000854372	-0.279682	0.289278		ENSG00000138764	CCNG2	0.233118	0.252549	1.78801	9.42775e-08	0.748112	0.00467755
ENSG00000117676	RPS6KA1	0.0192869	0.950886	-0.350006	0.0875341	-0.413196	0.0418354		ENSG00000176842	IRX5	0.19063	0.287158	0.460595	0.028023	0.101371	0.70658		ENSG00000138772	ANXA3	0.000816484	0.999293	0.904858	0.000517342	0.847624	0.00111513
ENSG00000117751	PPP1R8	-0.0478328	0.80339	-0.536318	0.0010834	-0.391268	0.0258155		ENSG00000177000	MTHFR	0.269965	0.167208	0.735115	0.000366499	0.271071	0.238685		ENSG00000139131	YARS2	-0.198671	0.310121	0.275171	0.301052	0.738849	0.00476177
ENSG00000118197	DDX59	0.105937	0.52756	-0.238615	0.268045	-0.493294	0.0126166		ENSG00000177181	RIMKLA	1.79884	3.27168e-13	0.725679	0.00109185	-0.668081	0.00285684		ENSG00000139178	C1RL	-0.0230494	0.938516	0.439103	0.0965807	0.528153	0.0430632
ENSG00000118873	RAB3GAP2	0.0313311	0.894943	-0.280395	0.158328	-0.378013	0.0496918		ENSG00000177606	JUN	0.227948	0.247252	0.892867	9.39785e-05	0.381936	0.102539		ENSG00000139278	GLIPR1	0.0139143	0.97157	0.765302	0.0086069	0.60397	0.0234925
ENSG00000118900	UBN1	-0.0600625	0.750617	-0.469147	0.0132028	-0.286934	0.164646		ENSG00000177854	TMEM187	0.442679	0.0602251	0.482196	0.0378651	-0.0476947	0.88366		ENSG00000139318	DUSP6	0.114844	0.529489	0.761078	0.0012283	0.390595	0.103341
ENSG00000119041	GTF3C3	0.0533921	0.776561	-0.244049	0.211978	-0.394473	0.0329443		ENSG00000178096	BOLA1	0.109285	0.534029	0.476698	0.0264217	0.192338	0.436881		ENSG00000139597	N4BP2L1	-0.0376575	0.877586	0.391257	0.132658	0.539494	0.0353004
ENSG00000119203	CPSF3	-0.0195097	0.946727	-0.490853	0.00476136	-0.420572	0.0206158		ENSG00000178538	CA8	0.538387	0.0450498	0.401271	0.121841	-0.176486	0.53887		ENSG00000139620	KANSL2	-0.0976857	0.591122	0.308856	0.251615	0.655063	0.0159731
ENSG00000119285	HEATR1	0.0203103	0.948104	-0.595183	0.00396441	-0.667492	0.00160301		ENSG00000178573	MAF	0.622061	0.0291933	1.95697	3.49574e-08	0.547204	0.0332651		ENSG00000139644	TMBIM6	0.0723429	0.660539	0.374102	0.0288859	0.189915	0.331089
ENSG00000119522	DENND1A	0.114933	0.47174	-0.571925	0.0011448	-0.854666	1.2535e-06		ENSG00000178695	KCTD12	0.107887	0.511394	0.639178	0.000368584	0.365451	0.0608055		ENSG00000139687	RB1	0.00560777	0.990723	0.478111	0.0449703	0.442349	0.0643831
ENSG00000119547	ONECUT2	-0.104271	0.547878	-0.632939	0.00200656	-0.340145	0.123202		ENSG00000178802	MPI	0.430761	0.0345161	0.230938	0.286441	-0.243537	0.260407		ENSG00000139946	PELI2	-0.0824633	0.644819	0.203555	0.389905	0.429327	0.0437622
ENSG00000119599	DCAF4	-0.455382	0.0331489	-0.456685	0.0254705	0.0512178	0.862699		ENSG00000181264	TLCD5	0.71693	0.00508932	0.248838	0.323996	-0.400493	0.088424		ENSG00000140382	HMG20A	-0.0251181	0.930009	0.451182	0.0795539	0.549584	0.0320633
ENSG00000119705	SLIRP	-0.05995	0.755544	-0.446702	0.02545	-0.260835	0.232108		ENSG00000181458	TMEM45A	2.86802	3.21361e-63	3.52719	1.67856e-95	0.528248	0.00393908		ENSG00000140450	ARRDC4	-0.443709	0.0740157	0.0579029	0.871016	0.630374	0.0134847
ENSG00000119969	HELLS	-0.103939	0.543119	-0.579122	0.00321724	-0.30324	0.159606		ENSG00000182168	UNC5C	0.231368	0.255148	0.601589	0.0230918	0.114572	0.708861		ENSG00000140525	FANCI	-0.103735	0.566409	0.302955	0.206734	0.592588	0.00982578
ENSG00000120254	MTHFD1L	-0.0208611	0.938952	-0.587586	0.000761639	-0.508021	0.00555691		ENSG00000182220	ATP6AP2	0.0549791	0.746513	0.313385	0.0387243	0.176237	0.303366		ENSG00000140678	ITGAX	-0.114949	0.504289	0.546233	0.007219	0.867068	2.72865e-05
ENSG00000120334	CENPL	-0.125128	0.455483	-0.416745	0.0373347	-0.134287	0.587768		ENSG00000182287	AP1S2	0.582623	0.00287793	0.643373	0.000285019	0.0484917	0.858591		ENSG00000140876	NUDT7	-0.0846365	0.655067	0.445127	0.0946829	0.800826	0.00484726
ENSG00000120509	PDZD11	0.114892	0.534029	-0.287431	0.263282	-0.612232	0.0125594		ENSG00000182534	MXRA7	0.0859303	0.653196	0.624464	0.0134388	0.310397	0.229691		ENSG00000140941	MAP1LC3B	-0.035258	0.869624	0.287918	0.119563	0.392474	0.029373
ENSG00000120662	MTRF1	-0.117172	0.506397	-0.445233	0.0452019	-0.149822	0.574174		ENSG00000182580	EPHB3	1.73566	3.26455e-06	0.460845	0.0770415	-0.60974	0.0189373		ENSG00000141034	GID4	-0.0396939	0.866073	0.469597	0.0613805	0.629016	0.012674
ENSG00000120896	SORBS3	-0.0131035	0.971817	-0.524783	0.0344888	-0.450056	0.0693733		ENSG00000182985	CADM1	0.177644	0.336875	0.853411	9.77355e-05	0.410678	0.069243		ENSG00000141428	C18orf21	-0.155241	0.410278	0.159961	0.592653	0.532863	0.0359837
ENSG00000120899	PTK2B	0.0566548	0.783592	-0.502988	0.0290248	-0.711986	0.0022926		ENSG00000183023	SLC8A1	0.104524	0.493613	0.417224	0.00897687	0.191001	0.305082		ENSG00000141542	RAB40B	-0.149104	0.424633	0.242821	0.367857	0.622038	0.0139414
ENSG00000120913	PDLIM2	-0.172504	0.27223	-0.624888	0.00013779	-0.303218	0.102815		ENSG00000183255	PTTG1IP	0.593951	0.00150248	0.371523	0.0435972	-0.203273	0.323696		ENSG00000141627	DYM	-0.00457498	0.993596	0.419698	0.0535696	0.430158	0.0487448
ENSG00000120942	UBIAD1	-0.450622	0.0310905	-0.375711	0.0660975	0.118873	0.639175		ENSG00000183508	TENT5C	2.16161	1.29143e-06	1.80646	1.07195e-05	-0.101567	0.744963		ENSG00000141644	MBD1	0.0274087	0.919284	0.64192	0.00619187	0.503768	0.0331218
ENSG00000121067	SPOP	0.296734	0.146765	-0.0734394	0.806539	-0.50662	0.0199013		ENSG00000183734	ASCL2	0.220961	0.266192	0.512491	0.0410434	0.0765091	0.814443		ENSG00000141858	SAMD1	0.0321876	0.901073	0.855216	0.000445385	0.658295	0.00636631
ENSG00000121075	TBX4	-0.0813387	0.67321	-0.705106	0.00639428	-0.37472	0.142783		ENSG00000183831	ANKRD45	0.319492	0.132974	0.530488	0.0171725	0.0618574	0.84187		ENSG00000142197	DOP1B	-0.0352229	0.880719	0.384352	0.0816281	0.506421	0.0202776
ENSG00000121152	NCAPH	-0.00660467	0.987391	-0.650291	0.000304935	-0.616055	0.00111483		ENSG00000184005	ST6GALNAC3	0.653042	0.0282806	0.120603	0.706192	-0.503246	0.0535106		ENSG00000142208	AKT1	0.0120451	0.972069	0.712575	0.0196212	0.489291	0.0436534
ENSG00000121274	TENT4B	-0.0204496	0.950666	-0.565513	0.0121736	-0.467406	0.0425136		ENSG00000185621	LMLN	0.121823	0.510294	0.531634	0.031018	0.19077	0.489119		ENSG00000142227	EMP3	-0.0813796	0.67154	0.407007	0.102609	0.690004	0.00609792
ENSG00000121390	PSPC1	-0.286155	0.118162	-0.426304	0.0245748	-0.0277785	0.922637		ENSG00000185842	DNAH14	0.174476	0.33773	0.442338	0.0429047	0.0914861	0.745733		ENSG00000142444	TIMM29	-0.0866034	0.640196	0.355904	0.132086	0.621517	0.00729196
ENSG00000122140	MRPS2	-0.0779222	0.6581	-0.606376	0.00175166	-0.370592	0.0735232		ENSG00000185950	IRS2	0.521084	0.00226833	0.474648	0.00323775	-0.051089	0.83308		ENSG00000142669	SH3BGRL3	0.0530472	0.799791	0.899289	0.00582083	0.45548	0.0757019
ENSG00000122359	ANXA11	0.0765872	0.661929	-0.294352	0.157807	-0.504915	0.0106989		ENSG00000186047	DLEU7	0.214309	0.230623	0.676583	0.000368584	0.282903	0.183413		ENSG00000143110	C1orf162	-0.223355	0.264568	0.072728	0.832476	0.494483	0.0491604
ENSG00000122515	ZMIZ2	-0.154528	0.401101	-0.470136	0.0423958	-0.12054	0.673392		ENSG00000186480	INSIG1	0.767771	0.000628049	1.26788	1.66565e-09	0.342469	0.119276		ENSG00000143119	CD53	-0.0354977	0.883859	0.515909	0.030775	0.656826	0.00660005
ENSG00000122912	SLC25A16	-0.0653702	0.745912	-0.556722	0.0172145	-0.319865	0.193177		ENSG00000186918	ZNF395	2.78361	4.41609e-41	2.25298	4.11436e-27	-0.388798	0.0678653		ENSG00000143162	CREG1	0.0903551	0.614887	1.02814	1.34948e-06	0.672883	0.00176726
ENSG00000122965	RBM19	-0.0510615	0.805497	-0.534771	0.0105566	-0.353767	0.111332		ENSG00000187109	NAP1L1	0.0901755	0.60519	0.64639	0.00096424	0.381953	0.0672672		ENSG00000143164	DCAF6	0.0546849	0.770774	0.468583	0.00873202	0.304289	0.116623
ENSG00000122966	CIT	-0.315907	0.0998126	-0.458285	0.0192348	-0.0321094	0.912128		ENSG00000187994	RINL	0.873138	0.00337944	0.724146	0.00480945	-0.0714996	0.826483		ENSG00000143194	MAEL	-0.236619	0.247252	0.192842	0.512374	0.693595	0.0102347
ENSG00000122971	ACADS	-0.168374	0.373029	-0.496995	0.0448075	-0.111556	0.711738		ENSG00000188042	ARL4C	0.807623	0.00119957	0.583177	0.00888836	-0.150025	0.577597		ENSG00000143353	LYPLAL1	0.0243182	0.934585	1.1989	3.55751e-05	0.919723	0.000614795
ENSG00000123064	DDX54	-0.0313487	0.891239	-0.480141	0.00527054	-0.376206	0.0384983		ENSG00000188177	ZC3H6	0.142497	0.444664	0.649311	0.0081483	0.255981	0.328153		ENSG00000143416	SELENBP1	0.157432	0.400144	1.55477	3.58492e-05	0.570521	0.0302916
ENSG00000123136	DDX39A	-0.0534048	0.776639	-0.756823	7.02206e-06	-0.576564	0.00137367		ENSG00000188994	ZNF292	0.439922	0.0678344	0.628967	0.00833205	0.0589724	0.8574		ENSG00000143546	S100A8	-0.12448	0.494353	0.729271	0.00140177	1.15525	1.89967e-06
ENSG00000123411	IKZF4	-0.0582325	0.770253	-0.445577	0.0407524	-0.252993	0.286938		ENSG00000189050	RNFT1	0.10515	0.577172	0.607731	0.0164446	0.263836	0.320268		ENSG00000143653	SCCPDH	0.0436627	0.835729	0.465896	0.0263761	0.311237	0.162223
ENSG00000123570	RAB9B	0.29997	0.158336	-0.0197313	0.952859	-0.467015	0.0472832		ENSG00000196214	ZNF766	0.490024	0.0467091	0.496593	0.0371815	-0.0633501	0.84468		ENSG00000143674	MAP3K21	0.0449229	0.831558	0.442707	0.0400781	0.283938	0.215188
ENSG00000123685	BATF3	0.0693177	0.727765	-0.337153	0.171715	-0.565739	0.0175856		ENSG00000196284	SUPT3H	0.197208	0.31319	0.707348	0.00762119	0.21448	0.440948		ENSG00000143751	SDE2	-0.170975	0.350359	0.126602	0.647858	0.473708	0.0337237
ENSG00000123737	EXOSC9	-0.198583	0.234737	-0.762865	8.01809e-06	-0.391847	0.0381885		ENSG00000196415	PRTN3	0.0118264	0.974005	0.542467	0.00551542	0.489485	0.0149927		ENSG00000143924	EML4	-0.160389	0.399263	0.242652	0.382524	0.662822	0.012575
ENSG00000123836	PFKFB2	-0.163752	0.389907	-0.876631	0.00219265	-0.326635	0.212654		ENSG00000196562	SULF2	3.23991	8.11809e-25	4.5261	1.25764e-47	0.853386	0.00081695		ENSG00000143933	CALM2	0.012923	0.97157	0.386721	0.0400482	0.338655	0.082093
ENSG00000123992	DNPEP	-0.0392879	0.853526	-0.448344	0.02545	-0.312094	0.143019		ENSG00000196743	GM2A	0.0462888	0.81401	0.378231	0.0465777	0.235176	0.256665		ENSG00000144118	RALB	0.00933819	0.980871	0.410565	0.0367176	0.372123	0.0642581
ENSG00000124193	SRSF6	-0.141893	0.410846	-0.561204	0.00575174	-0.235943	0.305517		ENSG00000196968	FUT11	0.953003	3.88243e-06	0.572142	0.00380286	-0.276995	0.202366		ENSG00000144224	UBXN4	0.0115454	0.974168	0.576181	0.00189096	0.525234	0.00647603
ENSG00000124217	MOCS3	-0.198124	0.268347	-0.581824	0.00434511	-0.202884	0.397699		ENSG00000197324	LRP10	0.0754216	0.674892	0.520624	0.00999819	0.292931	0.183413		ENSG00000144744	UBA3	-0.0539947	0.805454	0.524731	0.0422505	0.758961	0.00449889
ENSG00000124228	DDX27	-0.00331517	0.995239	-0.42354	0.042485	-0.404608	0.0559711		ENSG00000197358	BNIP3P1	1.67374	1.46121e-10	2.69234	1.30086e-27	0.742879	0.0011221		ENSG00000144746	ARL6IP5	0.0832011	0.612596	0.470852	0.00610735	0.259562	0.175828
ENSG00000124233	SEMG1	0.00304789	0.995468	-0.942298	0.00439026	-0.808696	0.00542085		ENSG00000197471	SPN	0.0759366	0.657267	0.48372	0.00727768	0.276278	0.165686		ENSG00000144895	EIF2A	-0.0338317	0.887531	0.452037	0.0349071	0.570958	0.00782714
ENSG00000124422	USP22	-0.00347266	0.995202	-0.687457	0.0022894	-0.652911	0.00456755		ENSG00000197852	INKA2	0.06337	0.733703	1.01926	0.0049456	0.413769	0.0938512		ENSG00000145414	NAF1	-0.314662	0.14931	0.0283494	0.932921	0.49153	0.0391507
ENSG00000124659	TBCC	0.0423311	0.834631	-0.293925	0.141149	-0.422698	0.0283377		ENSG00000197930	ERO1A	0.635676	0.00150248	0.723475	6.12202e-05	0.07628	0.770115		ENSG00000145428	RNF175	-0.306349	0.150883	0.124043	0.665611	0.590665	0.0105267
ENSG00000124762	CDKN1A	0.62478	0.00738426	0.0740747	0.80451	-0.53471	0.0135235		ENSG00000198162	MAN1A2	0.127631	0.46824	0.880687	4.92512e-05	0.490516	0.0269535		ENSG00000145592	RPL37	0.0132964	0.97157	0.571252	0.0065548	0.506721	0.0188778
ENSG00000125166	GOT2	0.0190846	0.95181	-0.614483	0.00770024	-0.687079	0.00362313		ENSG00000198242	RPL23A	0.375612	0.0490595	0.361392	0.0595893	-0.0806491	0.748058		ENSG00000145794	MEGF10	-0.0948651	0.590179	0.269204	0.320143	0.592748	0.025332
ENSG00000125246	CLYBL	0.02594	0.920814	-0.492866	0.0198138	-0.584712	0.00630663		ENSG00000198467	TPM2	0.0994734	0.595728	0.646636	0.0133118	0.290489	0.273417		ENSG00000145833	DDX46	-0.408555	0.0435462	0.185615	0.410608	0.680858	0.000416583
ENSG00000125378	BMP4	0.370895	0.113184	-0.18714	0.523479	-0.785324	0.0035313		ENSG00000198551	ZNF627	0.45441	0.0297428	0.300296	0.155793	-0.191978	0.406181		ENSG00000145860	RNF145	0.0720921	0.708077	0.572258	0.011088	0.324771	0.174556
ENSG00000125445	MRPS7	-0.0557983	0.767947	-0.637211	0.000383985	-0.454639	0.0175214		ENSG00000198598	MMP17	0.57328	0.0467091	0.213346	0.404318	-0.310053	0.194624		ENSG00000146083	RNF44	-0.133413	0.446147	0.527976	0.0114389	0.8819	3.05029e-05
ENSG00000125450	NUP85	-0.0435657	0.815403	-0.438142	0.00527361	-0.313367	0.0633723		ENSG00000198648	STK39	0.523297	0.0114572	0.0681778	0.80488	-0.465613	0.0186872		ENSG00000146094	DOK3	-0.0874954	0.644384	0.298939	0.239037	0.571191	0.0189976
ENSG00000125454	SLC25A19	0.179445	0.309412	-0.190337	0.487585	-0.659999	0.0142507		ENSG00000198718	TOGARAM1	0.0592923	0.760676	0.484172	0.0171725	0.292698	0.182149		ENSG00000146242	TPBG	-0.0204961	0.950602	0.426781	0.0639469	0.500303	0.0292366
ENSG00000125503	PPP1R12C	0.0373193	0.877213	-0.445687	0.0713879	-0.591532	0.0163874		ENSG00000198743	SLC5A3	1.03212	5.77086e-07	0.584934	0.00310392	-0.320229	0.135658		ENSG00000146278	PNRC1	-0.0142171	0.971041	1.07581	0.000231904	1.08783	0.000153229
ENSG00000125630	POLR1B	-0.367439	0.0379315	-0.35706	0.0430242	0.0683934	0.775939		ENSG00000198961	PJA2	0.151777	0.286076	0.372382	0.0132028	0.110376	0.566487		ENSG00000146281	PM20D2	0.0549965	0.770774	0.494633	0.00626889	0.326256	0.0946996
ENSG00000125657	TNFSF9	0.0586903	0.774675	-0.398101	0.0965185	-0.603173	0.0106516		ENSG00000201098	RNY1	0.853969	0.00696292	0.335909	0.204051	-0.35239	0.175642		ENSG00000146386	ABRACL	0.0203939	0.947968	0.455241	0.0327716	0.371639	0.0917776
ENSG00000125772	GPCPD1	0.0617437	0.753651	-0.274176	0.228289	-0.463032	0.0315766		ENSG00000203326	ZNF525	0.462292	0.0251262	0.413452	0.0376349	-0.0880743	0.735036		ENSG00000146416	AIG1	0.324305	0.098421	1.01812	1.23205e-07	0.475069	0.0192745
ENSG00000125775	SDCBP2	-0.165067	0.31728	-0.556742	0.0439949	-0.0812976	0.763629		ENSG00000204334	ERICH2	1.95392	0.00248723	1.99361	0.000947046	-0.000847396	0.997819		ENSG00000146677	RPL32P18	-0.0144742	0.967669	0.437117	0.0527834	0.486451	0.0307073
ENSG00000125779	PANK2	0.0218521	0.93663	-0.350985	0.0748454	-0.421105	0.0312738		ENSG00000204386	NEU1	0.476371	0.00945777	0.51739	0.00234477	0.0131928	0.961322		ENSG00000146802	TMEM168	-0.115189	0.53496	0.192166	0.498992	0.504706	0.0418354
ENSG00000125826	RBCK1	0.118511	0.4821	-0.173757	0.456356	-0.444519	0.0274135		ENSG00000204388	HSPA1B	0.438929	0.0723721	0.838091	0.00104672	0.18149	0.514743		ENSG00000147257	GPC3	0.00758508	0.986488	0.555689	0.0269852	0.500768	0.0451074
ENSG00000125834	STK35	0.0148193	0.964754	-0.498814	0.0158467	-0.54803	0.0090774		ENSG00000204406	MBD5	0.0995048	0.586264	0.594145	0.0091832	0.290387	0.23626		ENSG00000147421	HMBOX1	-0.0151714	0.963604	0.467225	0.0113004	0.51479	0.00631436
ENSG00000125835	SNRPB	-0.00410277	0.994152	-0.5028	0.0080779	-0.480704	0.0140164		ENSG00000205269	TMEM170B	0.464098	0.0182149	0.710943	5.86216e-05	0.178467	0.417673		ENSG00000147459	DOCK5	0.000406088	0.999392	0.633019	0.00533889	0.614701	0.00792834
ENSG00000125877	ITPA	-0.147098	0.400334	-0.732005	0.000273649	-0.372759	0.0847365		ENSG00000205413	SAMD9	0.0190692	0.951205	0.540786	0.0139652	0.452531	0.0446488		ENSG00000147533	GOLGA7	0.0484978	0.816968	0.595086	0.00752275	0.40282	0.0810446
ENSG00000125901	MRPS26	-0.0585328	0.767094	-0.484529	0.0210907	-0.290993	0.196924		ENSG00000206567		0.245565	0.196615	0.860798	0.00914073	0.140731	0.60994		ENSG00000147570	DNAJC5B	0.013324	0.970582	1.68788	1.08421e-19	1.57379	2.18418e-17
ENSG00000125962	ARMCX5	-0.068435	0.706637	-0.399941	0.0437536	-0.203257	0.364617		ENSG00000210077	MT-TV	-0.0132206	0.97157	0.749572	0.0158194	0.706793	0.00983461		ENSG00000147654	EBAG9	-0.00900187	0.981887	0.402374	0.061562	0.430034	0.0459567
ENSG00000125970	RALY	-0.0634235	0.722187	-0.373357	0.036617	-0.200691	0.318656		ENSG00000213654	GPSM3	0.0728435	0.699846	0.495748	0.0205792	0.267581	0.251054		ENSG00000147669	POLR2K	-0.012282	0.971992	0.467507	0.022162	0.506775	0.0142134
ENSG00000126067	PSMB2	-0.10831	0.492405	-0.520276	0.00186143	-0.273046	0.146087		ENSG00000213753	CENPBD2P	0.0291942	0.913069	0.505984	0.029767	0.37889	0.112577		ENSG00000147677	EIF3H	-0.0122471	0.971817	0.35399	0.073618	0.392368	0.0474805
ENSG00000126214	KLC1	-0.19873	0.250892	-0.72849	6.26192e-05	-0.347935	0.0854603		ENSG00000213918	DNASE1	0.114309	0.534029	0.518724	0.0297427	0.198734	0.458778		ENSG00000148090	AUH	-0.0055562	0.991244	0.544934	0.0461621	0.536745	0.0410376
ENSG00000126457	PRMT1	0.0216662	0.935301	-0.396365	0.0236779	-0.462143	0.00874458		ENSG00000214226	C17orf67	0.45952	0.0744164	0.618768	0.026798	-0.0086927	0.980446		ENSG00000148110	MFSD14B	-0.104364	0.548693	0.250708	0.27704	0.519597	0.014902
ENSG00000126581	BECN1	0.0400697	0.862887	-0.439112	0.0771109	-0.594325	0.0164151		ENSG00000214517	PPME1	0.391186	0.0575549	0.00593671	0.982911	-0.459872	0.0246253		ENSG00000148180	GSN	0.0555909	0.752867	0.481605	0.00145172	0.331771	0.0433229
ENSG00000126602	TRAP1	-0.166612	0.375247	-1.64594	2.88526e-05	-0.583798	0.0280485		ENSG00000214575	CPEB1	1.17783	0.00190497	0.264873	0.336365	-0.513863	0.0487674		ENSG00000148218	ALAD	-0.0809547	0.649652	0.265054	0.232655	0.490101	0.0189646
ENSG00000126749	EMG1	0.0184745	0.951281	-0.370701	0.0695039	-0.43122	0.0334895		ENSG00000219607	PPP1R3G	0.483035	0.0167031	0.566572	0.0022894	0.0410311	0.885121		ENSG00000148384	INPP5E	0.0239852	0.928374	1.07883	0.00380363	0.610034	0.0203436
ENSG00000126778	SIX1	0.0798056	0.669397	-0.266878	0.277431	-0.505399	0.0280485		ENSG00000221869	CEBPD	0.613614	0.00150248	0.928944	6.9252e-08	0.257681	0.201598		ENSG00000148700	ADD3	0.0517276	0.806275	1.11387	8.91216e-07	0.820854	0.000249404
ENSG00000126822	PLEKHG3	0.0307688	0.904352	-0.413704	0.0642873	-0.522635	0.0184805		ENSG00000225205	PDK1-AS1	0.411762	0.0852217	0.938109	0.00725968	0.0836533	0.774874		ENSG00000148943	LIN7C	0.00574264	0.989473	0.487295	0.0111314	0.459357	0.0202396
ENSG00000126934	MAP2K2	0.0413714	0.843601	-0.293244	0.174542	-0.425877	0.0401574		ENSG00000225434	LINC01504	0.504715	0.0588495	0.602882	0.0274955	-0.0272127	0.939383		ENSG00000149131	SERPING1	-0.0178128	0.958117	0.494203	0.0669426	0.556184	0.034888
ENSG00000127191	TRAF2	-0.0518017	0.807614	-0.520868	0.0241529	-0.325423	0.179632		ENSG00000225855	RUSC1-AS1	0.15525	0.400334	0.652853	0.0205201	0.182614	0.52137		ENSG00000149177	PTPRJ	-0.00226852	0.99765	0.658557	0.0141138	0.633618	0.0161222
ENSG00000127423	AUNIP	-0.0211808	0.94586	-0.511799	0.0286769	-0.412691	0.0833708		ENSG00000226791	LINC02611	0.357076	0.123658	0.63786	0.0228295	0.0423874	0.901975		ENSG00000149313	AASDHPPT	-0.0864449	0.633352	0.225111	0.351877	0.466319	0.0344638
ENSG00000127616	SMARCA4	-0.0291311	0.906237	-0.408046	0.0436996	-0.303595	0.153597		ENSG00000227039	ITGB2-AS1	1.83961	2.48948e-05	1.51275	6.53625e-05	-0.0727638	0.826004		ENSG00000149418	ST14	0.00495731	0.993405	0.51867	0.028023	0.483869	0.0416719
ENSG00000127884	ECHS1	0.019431	0.950701	-0.5042	0.00703908	-0.567379	0.00295104		ENSG00000227192		0.0695134	0.713413	0.649819	0.0247981	0.29143	0.258189		ENSG00000149483	TMEM138	-0.0803862	0.675179	0.355118	0.16066	0.625653	0.0121397
ENSG00000128191	DGCR8	-0.85524	0.000577504	-0.88284	7.76677e-05	-0.035851	0.911739		ENSG00000228956	SATB1-AS1	0.103568	0.569205	0.692092	0.00243945	0.362876	0.126318		ENSG00000149557	FEZ1	-0.0105047	0.979472	0.647619	0.0153051	0.670881	0.0114424
ENSG00000128228	SDF2L1	0.0231271	0.928157	-0.408773	0.0222056	-0.480127	0.00766562		ENSG00000231890	DARS1-AS1	0.923104	0.0089654	1.76053	9.75682e-06	0.258609	0.340437		ENSG00000149932	TMEM219	0.0180838	0.950886	0.397221	0.0187894	0.336632	0.0568647
ENSG00000128272	ATF4	0.227108	0.215976	-0.207452	0.367385	-0.594346	0.00370961		ENSG00000232533	FAM131B-AS2	0.451486	0.0405558	0.717353	0.000445385	0.161072	0.520558		ENSG00000149972	CNTN5	-0.0704237	0.728627	0.351429	0.175106	0.60171	0.0185738
ENSG00000128283	CDC42EP1	-0.0207276	0.950886	-0.745235	0.00530041	-0.592042	0.0214981		ENSG00000232573	RPL3P4	0.043227	0.845418	0.570913	0.0171756	0.384319	0.1171		ENSG00000150681	RGS18	0.109778	0.520148	1.2972	5.33921e-11	0.888195	7.69749e-06
ENSG00000128563	PRKRIP1	-0.00308417	0.995239	-0.438088	0.0430058	-0.418521	0.055954		ENSG00000235609		0.204726	0.291922	0.781549	0.00657115	0.218059	0.435209		ENSG00000150782	IL18	-0.0436355	0.831727	0.636008	0.028287	0.848981	0.00425042
ENSG00000128573	FOXP2	0.00976919	0.979186	-0.39575	0.0301812	-0.424308	0.0214116		ENSG00000235823	OLMALINC	0.152807	0.393312	0.88822	0.00606964	0.25952	0.325249		ENSG00000150977	RILPL2	-0.107838	0.532905	0.218816	0.344339	0.48607	0.0204203
ENSG00000128585	MKLN1	0.103835	0.529578	-0.198372	0.359373	-0.443596	0.0217606		ENSG00000236778	INTS6-AS1	0.122776	0.50505	0.602332	0.0143302	0.243931	0.35744		ENSG00000151092	NGLY1	0.0203861	0.950886	0.500538	0.0360092	0.403316	0.0956043
ENSG00000128626	MRPS12	-0.0282744	0.905065	-0.711009	5.93692e-06	-0.609224	0.000249404		ENSG00000239415		0.101694	0.586997	0.620367	0.0143016	0.279168	0.288655		ENSG00000151470	C4orf33	0.0194851	0.952311	0.694633	0.0129112	0.533892	0.0414933
ENSG00000128965	CHAC1	1.84417	2.17641e-06	0.00874459	0.979364	-1.53208	4.4286e-06		ENSG00000242247	ARFGAP3	0.275694	0.107441	0.516432	0.00238991	0.130738	0.548555		ENSG00000152128	TMEM163	-0.186768	0.252549	0.0825747	0.779361	0.475469	0.0383408
ENSG00000128973	CLN6	0.0105902	0.978261	-0.534544	0.00953074	-0.567474	0.00716753		ENSG00000243927	MRPS6	0.390291	0.0175763	0.375742	0.0196516	-0.0548754	0.813333		ENSG00000152558	TMEM123	0.0160811	0.963604	0.80968	0.000228816	0.710035	0.00160301
ENSG00000129250	KIF1C	0.0478045	0.820952	-0.475867	0.0330809	-0.647439	0.0040203		ENSG00000244300	GATA2-AS1	0.130571	0.465626	0.484075	0.0317612	0.162765	0.541298		ENSG00000152784	PRDM8	0.0724193	0.708394	0.879374	0.00016607	0.562471	0.0151242
ENSG00000129351	ILF3	-0.0896371	0.567785	-0.427154	0.00931787	-0.215931	0.250789		ENSG00000247095	MIR210HG	5.25265	2.93463e-28	5.10678	1.30086e-27	-0.0386174	0.911057		ENSG00000152926	ZNF117	-0.163851	0.366588	0.260761	0.264789	0.614112	0.00495874
ENSG00000129465	RIPK3	0.00640671	0.988186	-0.497346	0.0570807	-0.507993	0.0484025		ENSG00000247746	USP51	0.52098	0.00945777	0.48635	0.00909006	-0.0511744	0.852519		ENSG00000153037	SRP19	-0.183938	0.344797	0.721932	0.00555472	1.3952	3.41724e-06
ENSG00000129559	NEDD8	0.0378173	0.874614	-0.370467	0.139611	-0.51252	0.0368766		ENSG00000248161		0.127104	0.450563	0.586405	0.037771	0.149174	0.59017		ENSG00000153179	RASSF3	0.0482378	0.811816	0.951018	0.006715	0.425068	0.0792991
ENSG00000130005	GAMT	0.114859	0.494353	-0.454774	0.0202009	-0.74166	0.000117136		ENSG00000248360	LINC00504	0.0326131	0.895168	0.500859	0.0191896	0.372243	0.0949032		ENSG00000153207	AHCTF1	-0.131201	0.429029	0.127311	0.602002	0.408002	0.0410808
ENSG00000130165	ELOF1	0.0334979	0.890352	-0.417483	0.0575369	-0.534497	0.0140164		ENSG00000249669	CARMN	0.411157	0.0871686	1.031	0.00482249	0.115078	0.688845		ENSG00000153561	RMND5A	-0.0589531	0.776093	0.383387	0.118364	0.593336	0.0142109
ENSG00000130193	THEM6	0.0102082	0.979186	-0.421161	0.0626777	-0.453516	0.0448611		ENSG00000253123		0.534498	0.0467091	0.424614	0.0812915	-0.113702	0.638721		ENSG00000153814	JAZF1	0.00327508	0.995239	0.627157	0.021894	0.567226	0.0312738
ENSG00000130299	GTPBP3	-0.0662728	0.706637	-0.484491	0.00617307	-0.29738	0.124489		ENSG00000253187	HOXA10-AS	-0.054575	0.799791	0.370904	0.163877	0.58781	0.0263552		ENSG00000153936	HS2ST1	-0.0358201	0.880719	0.455373	0.0485257	0.588305	0.0105267
ENSG00000130305	NSUN5	-0.0142569	0.967073	-0.709461	0.000381941	-0.636303	0.00208749		ENSG00000253821		0.261665	0.212034	0.577275	0.0284903	0.0790786	0.810596		ENSG00000154813	DPH3	-0.0861641	0.649654	0.385544	0.124102	0.676779	0.00708753
ENSG00000130311	DDA1	0.0142197	0.96697	-0.482147	0.0169692	-0.52834	0.00983461		ENSG00000254615	NA	0.802834	0.000159777	0.421702	0.0408801	-0.304026	0.157521		ENSG00000154945	ANKRD40	-0.095541	0.595474	0.18571	0.473767	0.443344	0.0497939
ENSG00000130332	LSM7	-0.0103883	0.976925	-0.42767	0.0151273	-0.388541	0.0330859		ENSG00000254685	FPGT	0.209339	0.251664	0.460617	0.0260022	0.0900176	0.740524		ENSG00000155090	KLF10	0.0470099	0.831885	0.576945	0.0287727	0.354114	0.175621
ENSG00000130396	AFDN	0.35431	0.116064	-0.315935	0.212519	-0.91251	0.000330988		ENSG00000254912	MPHOSPH10P2	0.0459906	0.836897	0.575952	0.0287066	0.357309	0.170544		ENSG00000155096	AZIN1	0.149903	0.363372	0.492007	0.00727768	0.187891	0.388463
ENSG00000130489	NA	-0.0128906	0.97157	-0.488764	0.022486	-0.429757	0.0496663		ENSG00000255046		0.588867	0.0447752	0.336136	0.202683	-0.231507	0.385283		ENSG00000155111	CDK19	0.228612	0.230255	0.536895	0.0119115	0.131847	0.622397
ENSG00000130560	UBAC1	0.00380223	0.994152	-0.406559	0.0171725	-0.414942	0.0175856		ENSG00000255833	TIFAB	0.841184	0.000577504	0.271135	0.257151	-0.462252	0.0391507		ENSG00000155307	SAMSN1	-0.00419636	0.994152	0.548858	0.0157729	0.554161	0.0160679
ENSG00000130638	ATXN10	0.00918985	0.981477	-0.45857	0.0188399	-0.485788	0.0142703		ENSG00000258056	CD63-AS1	0.499416	0.0491385	0.724474	0.00379897	0.0864374	0.783262		ENSG00000155368	DBI	0.00463241	0.993596	0.541401	0.00592399	0.515136	0.0107141
ENSG00000130706	ADRM1	-0.0743265	0.692945	-0.537096	0.0129112	-0.298598	0.19864		ENSG00000258701	LINC00638	0.622075	0.040551	0.419333	0.107684	-0.162758	0.543888		ENSG00000155629	PIK3AP1	-0.0327905	0.896274	0.439362	0.0510298	0.557901	0.0126892
ENSG00000130720	FIBCD1	0.168438	0.375857	-0.338449	0.196593	-0.792461	0.00306207		ENSG00000260188		0.364613	0.0805417	1.31566	1.71549e-10	0.645796	0.00164597		ENSG00000155849	ELMO1	-0.00836495	0.983714	0.449376	0.0435604	0.474093	0.0336218
ENSG00000130725	UBE2M	0.0088213	0.982822	-0.424301	0.0625537	-0.451352	0.0474122		ENSG00000260630	SNAI3-AS1	0.58999	0.0327568	1.13648	0.000139673	0.222874	0.419588		ENSG00000155893	PXYLP1	0.0271904	0.920834	0.734603	0.00967623	0.523674	0.0452813
ENSG00000130731	METTL26	0.0416595	0.847183	-0.456297	0.0363586	-0.602893	0.00565652		ENSG00000260916	CCPG1	0.0892213	0.625642	0.483518	0.0327716	0.218395	0.387942		ENSG00000156011	PSD3	0.0262949	0.919284	0.671441	0.000280469	0.563457	0.00375744
ENSG00000130748	TMEM160	-0.0105861	0.979186	-0.564977	0.0160903	-0.503147	0.0337237		ENSG00000261097	LINC00563	0.471814	0.0681827	1.06702	0.000633461	0.208725	0.457117		ENSG00000156017	CARNMT1	-0.111644	0.539691	0.307127	0.208924	0.617383	0.00878261
ENSG00000130749	ZC3H4	0.039155	0.853227	-0.38533	0.054976	-0.510953	0.00980447		ENSG00000261824	LINC00662	0.219158	0.265664	0.532467	0.0269252	0.105491	0.724546		ENSG00000156136	DCK	-0.02031	0.950886	0.413709	0.0990465	0.4895	0.0482028
ENSG00000130764	LRRC47	0.00624802	0.988076	-0.439707	0.0378651	-0.456432	0.0325698		ENSG00000266075	RN7SL574P	-0.0591762	0.739538	0.318117	0.20344	0.542596	0.0264686		ENSG00000156599	ZDHHC5	-0.0129588	0.971935	0.485337	0.0535481	0.529502	0.0336359
ENSG00000130766	SESN2	0.928982	0.00134293	-0.0806575	0.806539	-0.981815	0.000167602		ENSG00000266208	GJD3-AS1	0.916561	0.00532246	0.402636	0.124684	-0.307816	0.245187		ENSG00000156875	MFSD14A	-0.0289823	0.916167	0.598253	0.0186887	0.723471	0.00535924
ENSG00000130770	ATP5IF1	0.0366599	0.857332	-0.3146	0.0712445	-0.419924	0.0140674		ENSG00000267034	NA	0.216142	0.26349	1.14026	0.00116916	0.307663	0.243472		ENSG00000156973	PDE6D	-0.0318057	0.904	0.398755	0.135152	0.526483	0.0445768
ENSG00000130810	PPAN	-0.0323403	0.903227	-0.607694	0.0205729	-0.431715	0.0936137		ENSG00000267892		0.0315691	0.882473	0.811607	0.0131363	0.397922	0.074382		ENSG00000156976	EIF4A2	0.903147	0.000191556	2.02908	7.41459e-18	0.762086	0.000659225
ENSG00000130844	ZNF331	-0.746605	0.0175763	-0.917717	0.00256585	-0.0491688	0.886048		ENSG00000269243		0.832271	0.00253119	2.36149	8.31873e-18	1.02185	3.44969e-05		ENSG00000157191	NECAP2	-0.0442724	0.843601	0.520515	0.0485257	0.717768	0.00789979
ENSG00000131016	AKAP12	0.0850921	0.6581	-0.38021	0.146924	-0.683734	0.00980447		ENSG00000272156		0.225437	0.258094	0.5049	0.0378203	0.0766344	0.810726		ENSG00000157303	SUSD3	-0.00613591	0.989371	0.671023	0.00484396	0.680332	0.00487989
ENSG00000131043	AAR2	-0.0155987	0.963604	-0.521094	0.0127455	-0.45127	0.0359837		ENSG00000272325	NUDT3	0.313531	0.0602251	0.522394	0.00102127	0.124259	0.549701		ENSG00000157426	AASDH	-0.0126995	0.972069	0.842759	0.00035542	0.881351	0.000249948
ENSG00000131143	COX4I1	0.0770933	0.649652	-0.366232	0.0519194	-0.571351	0.0017734		ENSG00000272746	NA	0.00690735	0.987905	0.517581	0.0494811	0.461445	0.0731587		ENSG00000157445	CACNA2D3	-0.0510611	0.81401	0.367153	0.167824	0.569245	0.0305195
ENSG00000131148	EMC8	-0.135644	0.410846	-0.541147	0.00394911	-0.240818	0.259813		ENSG00000272808	GCAWKR	0.09538	0.591122	0.706298	0.0166513	0.27154	0.300941		ENSG00000157514	TSC22D3	0.167926	0.348836	0.864969	0.00741663	0.221115	0.404127
ENSG00000131196	NFATC1	0.143712	0.410846	-0.209918	0.384948	-0.529292	0.0140164		ENSG00000272825		0.841789	0.018798	3.24046	3.58492e-05	0.233738	0.293387		ENSG00000157869	RAB28	-0.0187738	0.955511	0.64673	0.0171436	0.717328	0.00844154
ENSG00000131351	HAUS8	-0.0117709	0.974168	-0.478998	0.0207576	-0.426507	0.0448611		ENSG00000273356	LINC02019	0.0483486	0.81401	0.545126	0.0490886	0.280363	0.263891		ENSG00000158092	NCK1	0.0644268	0.752867	0.473312	0.0497903	0.246895	0.340875
ENSG00000131378	RFTN1	0.0447217	0.832725	-0.481807	0.026798	-0.640462	0.00352426		ENSG00000276509		0.52635	0.0490595	0.252077	0.359869	-0.309008	0.241967		ENSG00000158122	PRXL2C	-0.0030745	0.995468	0.530128	0.0286769	0.528957	0.029373
ENSG00000131435	PDLIM4	0.0133397	0.97157	-0.604782	0.0168356	-0.649114	0.0106989		ENSG00000277048	NA	1.3179	0.00325959	1.2067	0.00142727	-0.00871114	0.980142		ENSG00000158158	CNNM4	0.0145961	0.969714	0.572491	0.0305503	0.473184	0.0662593
ENSG00000131467	PSME3	-0.139728	0.408708	-0.667681	0.000457248	-0.340503	0.102406		ENSG00000278730		0.0108346	0.976925	0.423721	0.0430144	0.376882	0.0780764		ENSG00000158161	EYA3	-0.0795776	0.681979	0.397583	0.133797	0.708558	0.00935459
ENSG00000131584	ACAP3	-0.965214	0.0133713	-0.301269	0.251681	0.328743	0.183051		ENSG00000278952		0.224307	0.248693	1.20599	0.00117534	0.295352	0.259012		ENSG00000158290	CUL4B	0.0284688	0.916902	0.56082	0.0244516	0.419237	0.0939663
ENSG00000131653	TRAF7	0.15393	0.395592	-0.133138	0.629297	-0.463359	0.0388577		ENSG00000278982		1.58735	0.00103186	0.16637	0.571482	-0.706026	0.0110517		ENSG00000158473	CD1D	-0.0483348	0.81401	0.39183	0.0692973	0.552031	0.00947292
ENSG00000131779	PEX11B	-0.0568783	0.753651	-0.422718	0.0114389	-0.265011	0.149691		ENSG00000279673		0.192178	0.300079	0.754575	0.0118082	0.180347	0.522001		ENSG00000158615	PPP1R15B	-0.0489671	0.806435	0.344706	0.0797968	0.493024	0.0103881
ENSG00000132141	CCT6B	-0.123312	0.499709	-0.636582	0.00669688	-0.285094	0.257422		ENSG00000280128		0.0428233	0.851658	0.722488	0.00708097	0.47783	0.0613712		ENSG00000158636	EMSY	-0.319632	0.147128	0.0480088	0.890505	0.519721	0.030219
ENSG00000132199	ENOSF1	0.0273175	0.915902	-0.386192	0.05616	-0.475814	0.0174021											ENSG00000158769	F11R	0.0492974	0.81401	0.697539	0.0016485	0.489073	0.0308639
ENSG00000132300	PTCD3	-0.0341329	0.868238	-0.323762	0.0439949	-0.226257	0.192074											ENSG00000158987	RAPGEF6	0.00830441	0.984365	0.545939	0.035376	0.483487	0.0582022
ENSG00000132361	CLUH	-0.16457	0.386427	-0.878318	0.000778191	-0.37291	0.139395											ENSG00000159128	IFNGR2	0.246969	0.221671	1.03253	2.75466e-05	0.433993	0.0676756
ENSG00000132423	COQ3	-0.214086	0.250657	-0.83585	5.03947e-05	-0.388247	0.0764506											ENSG00000159322	ADPGK	-0.112537	0.544476	0.398829	0.131155	0.802844	0.00407981
ENSG00000132434	LANCL2	-0.330399	0.124591	-0.610108	0.0065548	-0.117125	0.67993											ENSG00000159399	HK2	1.25246	0.00098473	2.39568	4.09375e-10	0.480607	0.0630213
ENSG00000132522	GPS2	-0.0184713	0.950886	-1.03187	0.0063244	-0.533931	0.0223309											ENSG00000159450	TCHH	-0.0944203	0.617491	0.333873	0.208924	0.658178	0.0134847
ENSG00000132603	NIP7	-0.387126	0.0472958	-0.460299	0.0145208	-0.00130406	0.996267											ENSG00000159592	GPBP1L1	-0.00989456	0.979186	0.390426	0.0327716	0.419501	0.022864
ENSG00000132612	VPS4A	0.0031867	0.995239	-0.46967	0.0502153	-0.471744	0.0486737											ENSG00000159618	ADGRG5	-0.0741376	0.704862	0.27673	0.272729	0.511443	0.0322871
ENSG00000132716	DCAF8	-0.0544298	0.783598	-0.468892	0.0217816	-0.290095	0.186988											ENSG00000159658	EFCAB14	-0.0876539	0.644819	0.310753	0.228291	0.592101	0.0176751
ENSG00000132744	ACY3	0.0607865	0.752867	-0.280862	0.27135	-0.503597	0.0431131											ENSG00000159921	GNE	0.087699	0.646406	0.997491	0.000460798	0.528976	0.0374118
ENSG00000132768	DPH2	-0.281722	0.114705	-0.416578	0.0244034	-0.0263447	0.925322											ENSG00000160058	BSDC1	-0.060936	0.770774	0.41488	0.110525	0.654114	0.0126806
ENSG00000132823	OSER1	0.0328455	0.880719	-0.352034	0.0460655	-0.449104	0.00992536											ENSG00000160161	CILP2	-0.454346	0.076528	0.102588	0.754341	0.753862	0.00789979
ENSG00000132963	POMP	0.0506785	0.794937	-0.338848	0.0762011	-0.487862	0.00905946											ENSG00000160213	CSTB	0.0055934	0.988186	0.538855	0.0441897	0.394861	0.0652113
ENSG00000133059	DSTYK	-0.00440251	0.993793	-0.677991	0.00142727	-0.643682	0.00325471											ENSG00000160255	ITGB2	0.0400124	0.860411	1.50987	1.36396e-08	1.15127	5.0981e-06
ENSG00000133105	RXFP2	-0.168559	0.348181	-1.12067	0.00263489	-0.289241	0.249676											ENSG00000162368	CMPK1	-0.0246657	0.925209	0.383828	0.0598982	0.465565	0.0212498
ENSG00000133119	RFC3	-0.24765	0.16297	-0.781137	1.02386e-05	-0.362215	0.0646891											ENSG00000162434	JAK1	-0.0297463	0.907844	0.52994	0.0170128	0.642077	0.00449889
ENSG00000133169	BEX1	-0.145313	0.400144	-1.09697	3.08751e-08	-0.670907	0.00103701											ENSG00000162736	NCSTN	-0.0179216	0.934585	0.325421	0.106708	0.330073	0.0449054
ENSG00000133265	HSPBP1	0.0133795	0.97157	-0.468547	0.0369613	-0.513469	0.0223309											ENSG00000162813	BPNT1	-0.0343935	0.891724	0.464287	0.0579817	0.598935	0.0142703
ENSG00000133315	MACROD1	-0.0478115	0.826344	-0.601242	0.0314645	-0.341537	0.186988											ENSG00000162819	BROX	-0.0685553	0.734059	0.354613	0.158827	0.591957	0.0161362
ENSG00000133460	SLC2A11	0.755594	0.00495147	0.127121	0.66834	-0.55665	0.0200216											ENSG00000162851	TFB2M	-0.0469541	0.822029	0.432819	0.102899	0.640805	0.0171276
ENSG00000133619	KRBA1	-0.164209	0.371241	-0.542366	0.0170128	-0.173823	0.517324											ENSG00000162878	PKDCC	-0.00937503	0.979908	0.590382	0.0361317	0.533533	0.0262368
ENSG00000133863	TEX15	-0.0216553	0.94166	-0.860509	8.84064e-05	-0.731967	0.00115238											ENSG00000162923	WDR26	-0.108585	0.53496	0.470392	0.0272094	0.775274	0.000268987
ENSG00000133997	MED6	0.0410512	0.843775	-0.326232	0.117774	-0.457149	0.0239645											ENSG00000162972	MAIP1	-0.148848	0.410846	0.251713	0.308891	0.60043	0.0090769
ENSG00000134138	MEIS2	0.322934	0.10152	-0.0353384	0.909908	-0.466024	0.0234925											ENSG00000162976	SLC66A3	-0.0376845	0.868367	0.336281	0.131789	0.46388	0.0327228
ENSG00000134283	PPHLN1	-0.277418	0.149561	-0.605987	0.00210724	-0.17631	0.460095											ENSG00000163006	CCDC138	-0.54888	0.0269512	0.0533017	0.874359	0.65641	0.00521239
ENSG00000134574	DDB2	-0.0503629	0.806435	-0.561921	0.00610735	-0.382353	0.0759838											ENSG00000163221	S100A12	-0.0883741	0.643126	0.51956	0.0489859	0.898629	0.00165006
ENSG00000134684	YARS1	0.0553817	0.777135	-0.404419	0.0508684	-0.579148	0.00456755											ENSG00000163297	ANTXR2	0.271794	0.190534	1.7676	5.41908e-11	0.905251	0.000202085
ENSG00000134690	CDCA8	0.0014391	0.999184	-0.45127	0.00828647	-0.451294	0.0103595											ENSG00000163346	PBXIP1	0.00515212	0.991244	0.945163	3.56218e-07	0.902233	2.51092e-06
ENSG00000134748	PRPF38A	0.0688473	0.691014	-0.232107	0.232746	-0.412439	0.0229313											ENSG00000163393	SLC22A15	0.0322566	0.897669	0.528945	0.0183087	0.393262	0.0898088
ENSG00000134809	TIMM10	-0.00101288	0.999293	-0.742165	0.000854372	-0.717337	0.00163035											ENSG00000163412	EIF4E3	0.0203564	0.950003	0.7136	0.000695447	0.609884	0.00484726
ENSG00000134905	CARS2	0.147238	0.400663	-0.157811	0.534307	-0.471002	0.0258155											ENSG00000163513	TGFBR2	-0.000876461	0.999293	0.886668	1.51853e-05	0.868319	3.48024e-05
ENSG00000134917	ADAMTS8	0.0173703	0.961887	-0.75745	0.0107929	-0.791255	0.00588946											ENSG00000163565	IFI16	-0.096992	0.584052	0.507263	0.0162102	0.797038	0.00018856
ENSG00000134982	APC	0.0390544	0.853035	-0.275346	0.176652	-0.395812	0.0431131											ENSG00000163584	RPL22L1	-0.0612673	0.766841	0.441129	0.06818	0.665166	0.00629074
ENSG00000135040	NAA35	-0.052908	0.781573	-0.425546	0.0214195	-0.265806	0.186988											ENSG00000163728	TTC14	-0.297688	0.131524	0.0661086	0.821575	0.487457	0.0189976
ENSG00000135111	TBX3	0.0221456	0.94166	-0.534073	0.0245748	-0.619274	0.00980101											ENSG00000163785	RYK	-0.0400078	0.860648	0.508271	0.030867	0.664167	0.00535924
ENSG00000135451	TROAP	-0.309889	0.159989	-0.677977	0.00732633	-0.139722	0.636943											ENSG00000163803	PLB1	-0.0530922	0.803974	0.348699	0.149197	0.533312	0.0235498
ENSG00000135454	B4GALNT1	-0.122042	0.50324	-0.48329	0.0395891	-0.164467	0.550024											ENSG00000163818	LZTFL1	0.0186493	0.955511	0.706521	0.00920262	0.560685	0.031023
ENSG00000135596	MICAL1	-0.00105256	0.999293	-0.442178	0.0293677	-0.431615	0.0362318											ENSG00000163932	PRKCD	-0.070843	0.726842	0.41211	0.107723	0.677128	0.00878705
ENSG00000135605	TEC	0.118007	0.512404	-0.475062	0.0402699	-0.823449	0.000460289											ENSG00000163946	TASOR	-0.0177568	0.951205	0.380342	0.0287764	0.433681	0.0133184
ENSG00000135617	PRADC1	-0.0206921	0.941361	-0.428071	0.0205059	-0.354131	0.0661409											ENSG00000164047	CAMP	0.0106735	0.979186	0.781215	0.00818935	0.629283	0.0194994
ENSG00000135624	CCT7	0.0623372	0.713928	-0.245585	0.160331	-0.403548	0.0146508											ENSG00000164074	ABHD18	-0.00378278	0.994881	0.44397	0.0418418	0.450762	0.0402191
ENSG00000135678	CPM	-0.0171117	0.954669	-0.381566	0.0299981	-0.323129	0.0776609											ENSG00000164096	C4orf3	0.153089	0.381058	1.07699	1.55255e-07	0.631678	0.00254041
ENSG00000135835	KIAA1614	-0.0216738	0.943421	-1.0379	0.00424101	-0.621879	0.0189018											ENSG00000164099	PRSS12	-0.0105477	0.976666	0.388727	0.0294625	0.419633	0.0201698
ENSG00000135913	USP37	0.216604	0.245305	-0.0788519	0.785271	-0.450144	0.0354477											ENSG00000164134	NAA15	-0.375076	0.0261865	-0.0015407	0.995473	0.42152	0.0118037
ENSG00000135940	COX5B	0.0327198	0.887531	-0.338534	0.0862574	-0.442075	0.0223124											ENSG00000164603	BMT2	0.797163	0.00912007	1.64293	7.34136e-07	0.349326	0.177054
ENSG00000136010	ALDH1L2	0.42761	0.0577926	-0.167756	0.527806	-0.710465	0.00147057											ENSG00000164609	SLU7	-0.0304201	0.894148	0.325495	0.0586833	0.41394	0.0145872
ENSG00000136026	CKAP4	0.0350686	0.878547	-0.513993	0.0105245	-0.635552	0.00181451											ENSG00000164808	SPIDR	0.037523	0.871505	1.1057	8.45956e-07	0.870215	9.21275e-05
ENSG00000136153	LMO7	0.129202	0.450529	-0.343839	0.104844	-0.648621	0.0014773											ENSG00000164825	DEFB1	-0.040677	0.849577	0.671085	0.000803207	0.821893	5.51112e-05
ENSG00000136463	TACO1	-0.0241846	0.927935	-0.5347	0.00845869	-0.43592	0.0387611											ENSG00000164916	FOXK1	-0.184688	0.343025	0.162341	0.589693	0.575863	0.0247863
ENSG00000136518	ACTL6A	0.057688	0.774675	-0.526763	0.017008	-0.733168	0.00112835											ENSG00000164944	VIRMA	0.0403086	0.84138	0.486681	0.00589591	0.356154	0.0576906
ENSG00000136628	EPRS1	0.110889	0.515311	-0.188095	0.422621	-0.453437	0.027454											ENSG00000165071	TMEM71	-0.0563234	0.750862	0.319847	0.191339	0.533738	0.0251192
ENSG00000136699	SMPD4	-0.0268944	0.919284	-0.563973	0.0077911	-0.449217	0.0402026											ENSG00000165168	CYBB	-0.00798579	0.984365	0.729845	0.000574108	0.750183	0.000586046
ENSG00000136840	ST6GALNAC4	0.011041	0.975519	-0.402261	0.0333483	-0.435445	0.0221564											ENSG00000165175	MID1IP1	0.054166	0.7922	0.612617	0.00499672	0.40661	0.0720671
ENSG00000136856	SLC2A8	-0.00877516	0.98343	-0.640868	0.00705542	-0.579642	0.015514											ENSG00000165272	AQP3	0.0157079	0.955387	1.66848	0.00150585	0.6476	0.0071293
ENSG00000136877	FPGS	-0.0475758	0.81588	-0.482193	0.0212973	-0.315835	0.156251											ENSG00000165282	PIGO	0.0236947	0.93536	0.749157	0.0120553	0.518104	0.0471248
ENSG00000136930	PSMB7	0.0129079	0.97157	-0.436774	0.0197876	-0.476553	0.0121397											ENSG00000165359	INTS6L	-0.0441653	0.842606	0.431274	0.10631	0.620295	0.0209101
ENSG00000136935	GOLGA1	-0.0283496	0.913222	-0.530825	0.0111066	-0.415748	0.0553845											ENSG00000165389	SPTSSA	-0.0176684	0.958117	0.494261	0.0443006	0.559834	0.0223309
ENSG00000137070	IL11RA	-0.0583993	0.774675	-0.659617	0.00330632	-0.430265	0.0618939											ENSG00000165502	RPL36AL	-0.029916	0.904	0.302915	0.144901	0.399914	0.0482939
ENSG00000137100	DCTN3	0.0763109	0.64752	-0.231088	0.235025	-0.424526	0.0189976											ENSG00000165512	ZNF22	-0.0402976	0.862949	0.350082	0.182838	0.504693	0.0485671
ENSG00000137133	HINT2	0.109629	0.526344	-0.304973	0.164122	-0.58239	0.00524879											ENSG00000165533	TTC8	-0.126482	0.4569	0.450762	0.0918031	1.03189	0.00146081
ENSG00000137135	ARHGEF39	-0.253935	0.198787	-0.54601	0.0132028	-0.115248	0.680636											ENSG00000165629	ATP5F1C	-0.0456943	0.838153	0.33135	0.210271	0.504531	0.0496533
ENSG00000137166	FOXP4	-0.134183	0.465626	-0.734943	0.00290497	-0.330855	0.189621											ENSG00000165716	DIPK1B	-0.0274618	0.915727	0.393336	0.130008	0.488193	0.049035
ENSG00000137168	PPIL1	-0.249606	0.136947	-0.532462	0.00145172	-0.164107	0.430125											ENSG00000165801	ARHGEF40	-0.0402969	0.862948	0.557209	0.0376516	0.743639	0.00705014
ENSG00000137288	UQCC2	0.0533662	0.779927	-0.304272	0.12047	-0.459266	0.0148359											ENSG00000165914	TTC7B	-0.0163333	0.963001	0.415616	0.0639187	0.471923	0.0344638
ENSG00000137486	ARRB1	-0.044706	0.829027	-0.408745	0.045911	-0.260143	0.240185											ENSG00000166128	RAB8B	0.341999	0.101781	1.11284	2.68401e-07	0.487832	0.0244338
ENSG00000137547	MRPL15	-0.0150891	0.963438	-0.529442	0.00142951	-0.473627	0.00659104											ENSG00000166189	HPS6	-0.070349	0.728271	0.414279	0.101528	0.673614	0.00838583
ENSG00000137700	SLC37A4	-0.647583	0.00780467	-0.286909	0.224279	0.322703	0.169019											ENSG00000166233	ARIH1	-0.0646805	0.737798	0.35645	0.100546	0.556093	0.00860701
ENSG00000137713	PPP2R1B	-0.015082	0.963604	-0.502166	0.0111125	-0.438806	0.0319579											ENSG00000166479	TMX3	0.00488601	0.992099	0.395152	0.0380903	0.37346	0.055365
ENSG00000137814	HAUS2	0.00632768	0.988076	-0.518415	0.0251187	-0.533565	0.0219346											ENSG00000166482	MFAP4	0.00938706	0.981887	1.069	0.00138015	0.827557	0.00425615
ENSG00000137817	PARP6	-0.0184548	0.955387	-0.542318	0.0213066	-0.449901	0.0588023											ENSG00000166575	TMEM135	0.0051342	0.991244	0.587698	0.00159274	0.559672	0.00385382
ENSG00000138061	CYP1B1	0.271982	0.151974	-0.350642	0.0907393	-0.790713	5.76399e-05											ENSG00000166710	B2M	0.0271718	0.916167	0.507058	0.0103394	0.402557	0.0509452
ENSG00000138074	SLC5A6	-0.00357239	0.995101	-0.703176	0.0022495	-0.665545	0.00450701											ENSG00000166734	GOLM2	0.104601	0.512398	0.666946	6.03004e-05	0.407124	0.0248455
ENSG00000138083	SIX3	-0.0107858	0.975853	-0.404174	0.0245748	-0.36399	0.0498631											ENSG00000166825	ANPEP	-0.0978698	0.544019	0.515812	0.00282406	0.761898	9.5884e-06
ENSG00000138107	ACTR1A	0.0126414	0.972049	-0.525854	0.0222056	-0.568261	0.0142507											ENSG00000166896	ATP23	-0.0942373	0.597898	0.370279	0.0964094	0.639725	0.00350477
ENSG00000138381	ASNSD1	-0.0541779	0.776779	-0.433287	0.0227334	-0.267243	0.195855											ENSG00000166927	MS4A7	0.133281	0.453171	0.52179	0.0161033	0.198437	0.429212
ENSG00000138685	FGF2	-0.143653	0.370471	-0.686761	0.0224271	-0.142427	0.55643											ENSG00000167207	NOD2	0.119385	0.516792	0.644747	0.00699298	0.289711	0.250636
ENSG00000138835	RGS3	1.17604	0.00177612	0.0862892	0.798503	-0.781486	0.00517558											ENSG00000167208	SNX20	0.00456149	0.993596	0.545934	0.00422156	0.520569	0.00824798
ENSG00000138944	SHISAL1	-0.111104	0.548693	-0.531344	0.0437997	-0.184238	0.520598											ENSG00000167635	ZNF146	-0.0165205	0.963092	0.477212	0.0437997	0.536588	0.023154
ENSG00000138964	PARVG	0.0154057	0.963604	-0.374914	0.0697761	-0.425245	0.0390775											ENSG00000167895	TMC8	-0.026892	0.920814	0.557076	0.0173011	0.663264	0.00542697
ENSG00000139132	FGD4	0.13464	0.465626	-0.223726	0.417858	-0.576082	0.0217606											ENSG00000167920	KRT10-AS1	0.223964	0.26349	0.657443	0.0146384	0.150591	0.611346
ENSG00000139180	NDUFA9	0.084674	0.595474	-0.504696	0.00215399	-0.718137	1.07625e-05											ENSG00000167986	DDB1	-0.0538187	0.784881	0.325294	0.121059	0.490743	0.0154537
ENSG00000139405	RITA1	-0.05069	0.802159	-0.502976	0.0112798	-0.332896	0.1171											ENSG00000168118	RAB4A	-0.0284969	0.914776	0.462984	0.0386726	0.567057	0.0113934
ENSG00000139410	SDSL	0.0473353	0.829291	-0.557889	0.0228928	-0.752951	0.0027262											ENSG00000168275	COA6	-0.0677527	0.739538	0.309591	0.234597	0.543447	0.0305195
ENSG00000139567	ACVRL1	0.0837666	0.637548	-0.377906	0.0790771	-0.618943	0.00337044											ENSG00000168291	PDHB	-0.0302632	0.907597	0.522235	0.0279481	0.64169	0.00758312
ENSG00000139718	SETD1B	-0.594734	0.00103186	-0.527873	0.00183089	0.0581543	0.817924											ENSG00000168300	PCMTD1	-0.0197687	0.950886	0.960847	9.75682e-06	1.03305	3.74841e-06
ENSG00000139737	SLAIN1	-0.0554296	0.766015	-0.514829	0.00296584	-0.349093	0.0608055											ENSG00000168310	IRF2	-0.00413122	0.994152	0.417146	0.0535823	0.425923	0.0497471
ENSG00000139998	RAB15	-0.104457	0.546284	-0.490772	0.0174304	-0.217907	0.355512											ENSG00000168329	CX3CR1	0.0307901	0.903227	0.602741	0.00386646	0.473118	0.0282222
ENSG00000140044	JDP2	1.02147	2.12455e-05	-0.146321	0.591591	-1.1798	3.12293e-07											ENSG00000168890	TMEM150A	-0.0832428	0.620314	0.417183	0.110189	0.802241	0.00535924
ENSG00000140319	SRP14	0.105268	0.499709	-0.214468	0.255611	-0.445122	0.00981269											ENSG00000168913	ENHO	0.151245	0.414577	1.27797	0.000121156	0.502476	0.0524516
ENSG00000140365	COMMD4	-0.0250363	0.919976	-0.383137	0.0349424	-0.299489	0.117994											ENSG00000168936	TMEM129	-0.19118	0.309653	0.230363	0.358508	0.622121	0.00681026
ENSG00000140451	PIF1	-0.0168529	0.962806	-0.932084	0.000146556	-0.794369	0.00118471											ENSG00000168938	PPIC	0.0284588	0.907899	0.504604	0.00770024	0.399829	0.0441988
ENSG00000140479	PCSK6	-0.00051641	0.999293	-0.748349	0.00125276	-0.722187	0.00218263											ENSG00000169032	MAP2K1	-0.0500742	0.816509	0.419486	0.113572	0.627271	0.0188619
ENSG00000140650	PMM2	-0.181105	0.345625	-0.504577	0.0378266	-0.111089	0.709862											ENSG00000169359	SLC33A1	0.0647207	0.739538	0.497545	0.0196937	0.286198	0.212096
ENSG00000140853	NLRC5	-0.101548	0.584052	-0.863927	0.000465294	-0.472147	0.0506869											ENSG00000169403	PTAFR	0.0384548	0.873872	1.45088	2.14296e-05	0.944025	0.00103701
ENSG00000140983	RHOT2	-0.200729	0.252051	-0.855579	4.14237e-06	-0.444645	0.025838											ENSG00000169429	CXCL8	-0.02113	0.950139	0.512512	0.057972	0.592081	0.0259934
ENSG00000141076	UTP4	-0.0717031	0.684817	-0.638562	0.000444054	-0.42052	0.0307224											ENSG00000169439	SDC2	0.010844	0.978758	0.486206	0.048716	0.425384	0.0855948
ENSG00000141295	SCRN2	-0.0733311	0.713413	-0.744854	0.00762141	-0.388307	0.13631											ENSG00000169504	CLIC4	0.103813	0.547033	0.508346	0.0124674	0.23602	0.303366
ENSG00000141384	TAF4B	-0.200589	0.284401	-0.531624	0.0170393	-0.138442	0.613548											ENSG00000169891	REPS2	0.0397614	0.866073	0.556274	0.0399584	0.350098	0.181707
ENSG00000141391	PRELID3A	-0.062462	0.75846	-0.887311	0.00533889	-0.439279	0.0888995											ENSG00000169896	ITGAM	0.17779	0.307194	1.0978	1.34538e-08	0.644318	0.00125252
ENSG00000141424	SLC39A6	-0.0418519	0.831652	-0.400589	0.0214188	-0.273909	0.144974											ENSG00000169926	KLF13	-0.104005	0.55103	0.415564	0.0553125	0.704856	0.00105604
ENSG00000141524	TMC6	0.0278396	0.911581	-0.31267	0.114654	-0.400778	0.0388955											ENSG00000170175	CHRNB1	-0.619147	0.0242778	-0.0463399	0.897009	0.5853	0.0204203
ENSG00000141569	TRIM65	-0.489146	0.0233378	-0.28368	0.191363	0.229964	0.315634											ENSG00000170190	SLC16A5	-0.108956	0.37021	0.113226	0.606597	0.365969	0.0337241
ENSG00000141582	CBX4	0.149701	0.370471	-0.34995	0.0752072	-0.66438	0.000424438											ENSG00000170248	PDCD6IP	-0.0306197	0.906502	0.554536	0.0206091	0.678637	0.00535924
ENSG00000141741	MIEN1	0.00087605	0.999293	-0.508084	0.0093731	-0.503653	0.0122198											ENSG00000170270	GON7	-0.0223338	0.94243	0.615661	0.0274544	0.702892	0.0109333
ENSG00000141873	SLC39A3	-0.0590774	0.76384	-0.495303	0.0160159	-0.302138	0.17362											ENSG00000170275	CRTAP	-0.0168616	0.963065	0.562385	0.0287727	0.625267	0.014991
ENSG00000141905	NFIC	-0.260469	0.143429	-0.395074	0.0344888	-0.0189515	0.947128											ENSG00000170325	PRDM10	0.0260031	0.925748	1.09469	0.00151838	0.705906	0.0107731
ENSG00000141959	PFKL	0.0568209	0.784881	-0.506247	0.0339253	-0.724145	0.00286025											ENSG00000170458	CD14	-0.132091	0.469906	1.18435	0.000258412	1.85733	2.68586e-07
ENSG00000141971	MVB12A	0.0847809	0.650582	-0.373916	0.122938	-0.645434	0.00697344											ENSG00000170540	ARL6IP1	0.0622726	0.752867	0.493404	0.0215848	0.287117	0.212654
ENSG00000141985	SH3GL1	-0.173087	0.340946	-0.435795	0.0457806	-0.087533	0.759536											ENSG00000170584	NUDCD2	-0.0401423	0.859582	0.395805	0.0988856	0.543221	0.0214792
ENSG00000142156	COL6A1	0.0268121	0.920814	-0.432871	0.064558	-0.531901	0.0221321											ENSG00000170634	ACYP2	0.0067691	0.987775	0.595507	0.00657115	0.552948	0.0134847
ENSG00000142168	SOD1	0.109711	0.465626	-0.138521	0.485785	-0.36631	0.0292366											ENSG00000171044	XKR6	0.0407949	0.859115	0.757636	0.00268865	0.534627	0.0302916
ENSG00000142230	SAE1	-0.0319527	0.897647	-0.539111	0.0108429	-0.410136	0.0614391											ENSG00000171105	INSR	0.0246805	0.920814	0.510623	0.00286612	0.424253	0.0185738
ENSG00000142252	GEMIN7	-0.217812	0.25723	-0.469315	0.0371634	-0.0733979	0.810479											ENSG00000171298	GAA	-0.0472585	0.811968	0.290175	0.139678	0.430235	0.0229283
ENSG00000142347	MYO1F	0.0441137	0.829359	-0.269901	0.193468	-0.405149	0.0410376											ENSG00000171310	CHST11	0.0743683	0.6581	0.511634	0.00282849	0.310842	0.0971101
ENSG00000142507	PSMB6	-0.00189992	0.998635	-0.387744	0.045911	-0.376335	0.0564686											ENSG00000171492	LRRC8D	-0.0522305	0.79887	0.31517	0.155045	0.481988	0.0239456
ENSG00000142528	ZNF473	-0.033478	0.893139	-0.6113	0.00656232	-0.462126	0.0448611											ENSG00000171617	ENC1	0.0621285	0.766841	0.587664	0.0239276	0.325759	0.209983
ENSG00000142856	ITGB3BP	-0.00562185	0.989473	-0.44174	0.0170163	-0.416724	0.0288475											ENSG00000171700	RGS19	-0.00468807	0.993596	0.501281	0.0248394	0.51033	0.0234925
ENSG00000143294	PRCC	-0.46095	0.0304842	-0.235234	0.290894	0.260988	0.242408											ENSG00000171867	PRNP	0.012833	0.97157	0.597929	0.00253301	0.537362	0.00869195
ENSG00000143314	MRPL24	0.0927221	0.604155	-0.511618	0.0160711	-0.794799	0.000210942											ENSG00000172159	FRMD3	-0.0274766	0.919284	0.622756	0.00674792	0.733512	0.00184732
ENSG00000143322	ABL2	-0.0514279	0.803784	-0.482938	0.0230326	-0.305112	0.179221											ENSG00000172172	MRPL13	-0.0161922	0.963604	0.470893	0.0613805	0.529834	0.0337237
ENSG00000143340	FAM163A	0.0619771	0.759823	-0.351878	0.147527	-0.560434	0.0176687											ENSG00000172322	CLEC12A	0.0442868	0.835752	0.642979	0.00306841	0.460531	0.0391286
ENSG00000143575	HAX1	0.067841	0.700225	-0.262111	0.176044	-0.442693	0.0152468											ENSG00000172403	SYNPO2	0.0279679	0.911581	0.760552	2.39805e-05	0.642624	0.000688175
ENSG00000143643	TTC13	-0.120129	0.514503	-0.547427	0.024467	-0.209743	0.439932											ENSG00000172469	MANEA	0.0153023	0.963726	0.586282	0.00694292	0.510071	0.0216193
ENSG00000143797	MBOAT2	0.306292	0.0850618	0.00150454	0.996146	-0.392453	0.0330859											ENSG00000172716	SLFN11	0.0231808	0.927497	0.355585	0.0465777	0.279563	0.137734
ENSG00000143851	PTPN7	-0.326603	0.0841891	-0.454733	0.0160484	-0.0295128	0.917431											ENSG00000172794	RAB37	-0.0321727	0.900164	0.767649	0.0110998	0.917087	0.0026093
ENSG00000143942	CHAC2	-0.0857531	0.624613	-0.416071	0.0451088	-0.181217	0.451882											ENSG00000172809	RPL38	0.020799	0.944387	0.521293	0.0100655	0.435007	0.0382721
ENSG00000144120	TMEM177	-0.193877	0.250892	-0.612673	0.000574353	-0.260068	0.200264											ENSG00000172932	ANKRD13D	-0.134952	0.429029	0.16643	0.495248	0.462893	0.0257389
ENSG00000144136	SLC20A1	-0.185712	0.225687	-0.417735	0.0096412	-0.112974	0.590541											ENSG00000172936	MYD88	-0.0541304	0.798917	0.533809	0.0511873	0.801892	0.00542697
ENSG00000144355	DLX1	-0.194205	0.300898	-0.844431	0.000227536	-0.376283	0.111948											ENSG00000173083	HPSE	-0.0174883	0.958117	0.505472	0.0297505	0.568807	0.014902
ENSG00000144504	ANKMY1	-0.0466791	0.832542	-0.779984	0.00795618	-0.462664	0.0747524											ENSG00000173276	ZBTB21	0.0604786	0.756966	0.564831	0.00595883	0.35967	0.0976904
ENSG00000144580	CNOT9	-0.0964852	0.578163	-0.42847	0.0354692	-0.177987	0.453346											ENSG00000173597	SULT1B1	-0.131676	0.457085	0.380577	0.153315	0.87124	0.00353314
ENSG00000144589	STK11IP	-0.0138407	0.969928	-0.526931	0.0135849	-0.462035	0.0347278											ENSG00000173706	HEG1	-0.040671	0.853227	0.431155	0.0512536	0.574364	0.00918431
ENSG00000144647	POMGNT2	0.0674232	0.73074	-0.367008	0.113044	-0.585101	0.00974224											ENSG00000173801	JUP	-0.0475063	0.819799	0.553999	0.045911	0.78815	0.00636631
ENSG00000144827	ABHD10	0.0415706	0.851658	-0.412175	0.0769089	-0.562601	0.0147762											ENSG00000173852	DPY19L1	-0.0477536	0.816509	0.3936	0.0712231	0.553778	0.00998544
ENSG00000145241	CENPC	-0.321037	0.0698176	-0.408914	0.0208481	-0.00359582	0.991384											ENSG00000173926	MARCHF3	0.0469001	0.820952	0.572926	0.00509007	0.400684	0.0605219
ENSG00000145494	NDUFS6	0.0235739	0.934988	-0.457157	0.0511212	-0.544652	0.0196632											ENSG00000174080	CTSF	-0.0529552	0.808099	0.448571	0.0816224	0.662885	0.0112048
ENSG00000145506	NKD2	-0.0675706	0.736444	-1.65402	4.90622e-09	-1.13913	1.3437e-05											ENSG00000174109	C16orf91	-0.0280524	0.919284	0.799466	0.00743687	0.924229	0.00208749
ENSG00000145861	C1QTNF2	0.119123	0.443367	-0.600409	0.0316358	-1.17041	0.000376383											ENSG00000174125	TLR1	-0.228045	0.258094	0.185011	0.520111	0.639695	0.0115994
ENSG00000145916	RMND5B	0.00174207	0.999028	-0.627263	0.00390392	-0.620959	0.00524879											ENSG00000174437	ATP2A2	-0.138089	0.400925	0.164821	0.459881	0.448947	0.0188045
ENSG00000146063	TRIM41	0.048834	0.80815	-0.43458	0.0276993	-0.588817	0.0027262											ENSG00000174718	RESF1	-0.0431276	0.843601	0.42015	0.0732541	0.577685	0.0133119
ENSG00000146072	TNFRSF21	0.0776309	0.678372	-0.355961	0.12622	-0.59726	0.00856158											ENSG00000174837	ADGRE1	0.0308088	0.883382	2.12617	0.0003586	0.759303	0.00510681
ENSG00000146205	ANO7	0.352791	0.126346	-0.0516874	0.887384	-0.565595	0.0255809											ENSG00000175040	CHST2	0.0354472	0.875434	1.39529	0.00127274	0.649896	0.0149021
ENSG00000146250	PRSS35	-0.0873772	0.582473	-1.40786	0.00231726	-0.352596	0.0997046											ENSG00000175110	MRPS22	-0.0501141	0.817846	0.413462	0.113889	0.615293	0.0187573
ENSG00000146263	MMS22L	-0.294376	0.136233	-0.465045	0.024727	-0.0393218	0.897413											ENSG00000175215	CTDSP2	-0.0567312	0.789382	0.626864	0.0192348	0.90889	0.00148462
ENSG00000146410	MTFR2	-0.0829385	0.637548	-0.66256	0.000820115	-0.406234	0.0530573											ENSG00000175376	EIF1AD	-0.0292454	0.914776	0.583277	0.0170128	0.705029	0.00484649
ENSG00000146540	C7orf50	0.410125	0.019572	-0.0692953	0.773302	-0.524972	0.00203506											ENSG00000175538	KCNE3	0.119603	0.512582	1.18008	4.24025e-06	0.655574	0.00630663
ENSG00000146701	MDH2	-0.0130009	0.97157	-0.418942	0.0485257	-0.364166	0.0945558											ENSG00000175701	MTLN	-0.0389854	0.823914	0.272142	0.213484	0.398252	0.0462203
ENSG00000146731	CCT6A	0.0430238	0.822163	-0.234249	0.192543	-0.353551	0.0391286											ENSG00000175857	GAPT	-0.0163555	0.961887	0.573015	0.00365587	0.628101	0.00184732
ENSG00000146733	PSPH	0.185862	0.271978	-0.076921	0.773302	-0.405095	0.039998											ENSG00000176171	BNIP3	1.75209	4.00587e-08	2.52453	7.69914e-17	0.454225	0.0671716
ENSG00000146828	SLC12A9	-0.19938	0.259852	-0.777628	5.18119e-05	-0.373879	0.0732373											ENSG00000176463	SLCO3A1	-0.00733317	0.985015	0.650295	0.000149444	0.669414	0.000167602
ENSG00000147180	ZNF711	-0.014373	0.968723	-0.500579	0.0323654	-0.428858	0.0697059											ENSG00000176597	B3GNT5	0.210166	0.271978	1.10907	3.72958e-06	0.530241	0.0210911
ENSG00000147206	NXF3	-0.0149569	0.96697	-1.46583	6.01493e-07	-1.21941	1.03958e-05											ENSG00000176845	METRNL	0.107796	0.561949	0.566602	0.0239626	0.232425	0.389072
ENSG00000147255	IGSF1	-0.0287345	0.915329	-0.542002	0.0198138	-0.412772	0.0831902											ENSG00000176903	PNMA1	-0.00397629	0.994152	0.56036	0.0437997	0.498045	0.0415232
ENSG00000147649	MTDH	0.0536617	0.776639	-0.260431	0.187958	-0.41374	0.0274378											ENSG00000177054	ZDHHC13	-0.145608	0.402295	0.245199	0.365919	0.68912	0.0123515
ENSG00000147684	NDUFB9	0.0528637	0.78531	-0.545285	0.00357206	-0.71452	0.00015705											ENSG00000177410	ZFAS1	-0.0157666	0.963604	0.431459	0.067414	0.487117	0.0379981
ENSG00000147687	TATDN1	0.0196141	0.950886	-0.482832	0.0450035	-0.555928	0.0209101											ENSG00000177613	CSTF2T	-0.0829537	0.647664	0.280999	0.223602	0.519173	0.0175856
ENSG00000147813	NAPRT	0.0137215	0.97157	-0.470847	0.0501493	-0.518388	0.0302916											ENSG00000177614	PGBD5	0.00995526	0.981075	0.605677	0.0216712	0.524984	0.0416229
ENSG00000147853	AK3	-0.0402416	0.853227	-0.549202	0.00917356	-0.394085	0.073393											ENSG00000178234	GALNT11	0.0120012	0.973946	0.722905	0.000224553	0.659213	0.00121524
ENSG00000148187	MRRF	0.0262332	0.919284	-0.534204	0.00606964	-0.62372	0.00163838											ENSG00000178498	DTX3	-0.0941767	0.512404	0.284668	0.225697	0.618685	0.00981269
ENSG00000148291	SURF2	-0.0543443	0.789033	-0.448916	0.0430058	-0.262877	0.272929											ENSG00000178860	MSC	-0.0292051	0.907472	0.567282	0.0426562	0.677898	0.012674
ENSG00000148308	GTF3C5	-0.0459712	0.831558	-0.724657	0.00153234	-0.515722	0.0258155											ENSG00000179152	TCAIM	0.0439233	0.826301	0.472223	0.00885723	0.331322	0.0867856
ENSG00000148334	PTGES2	-0.0125972	0.971992	-0.717772	0.0013537	-0.640067	0.00510681											ENSG00000179195	ZNF664	-0.062101	0.749245	0.231989	0.313085	0.417641	0.0498631
ENSG00000148341	SH3GLB2	-0.0100096	0.979186	-0.630559	0.0021308	-0.57738	0.00636985											ENSG00000179344	HLA-DQB1	-0.0873222	0.646627	0.264877	0.33544	0.554686	0.0337237
ENSG00000148362	PAXX	-0.00365585	0.995101	-0.621719	0.0139143	-0.578833	0.0214792											ENSG00000179542	SLITRK4	-0.0522002	0.798954	0.370454	0.0879585	0.540357	0.0111378
ENSG00000148444	COMMD3	0.00371606	0.994391	-0.483726	0.00559193	-0.490982	0.00633252											ENSG00000179796	LRRC3B	0.00433163	0.994152	1.61868	6.1159e-05	1.25085	0.000209828
ENSG00000148459	PDSS1	-0.030525	0.909498	-0.910541	0.00273393	-0.621978	0.0199968											ENSG00000179889	PDXDC1	0.0020869	0.997451	0.538229	0.00186143	0.524532	0.00357264
ENSG00000148468	FAM171A1	0.0275721	0.919284	-0.369584	0.123128	-0.469306	0.0462203											ENSG00000180044	C3orf80	-0.00458416	0.9937	0.696981	0.00559193	0.692962	0.00616797
ENSG00000148516	ZEB1	0.262072	0.207859	-0.331077	0.195354	-0.869278	0.00081695											ENSG00000180066	LINC02870	0.0231847	0.935316	0.667543	0.0231671	0.44621	0.0759017
ENSG00000148737	TCF7L2	-0.00285232	0.995632	-0.573366	0.0199988	-0.541002	0.0283377											ENSG00000180211		0.0168663	0.963208	0.544456	0.0388702	0.439483	0.089172
ENSG00000148803	FUOM	-0.0201629	0.950742	-0.592386	0.00658178	-0.496835	0.0259651											ENSG00000180233	ZNRF2	-0.0487689	0.822029	0.400138	0.105725	0.581899	0.0174299
ENSG00000149150	SLC43A1	0.0411341	0.853526	-0.362125	0.131388	-0.509588	0.0297807											ENSG00000180573	H2AC6	0.0684325	0.731312	2.22154	2.45286e-07	1.23814	0.000196335
ENSG00000149428	HYOU1	0.249461	0.225054	-0.142174	0.632321	-0.593078	0.0159731											ENSG00000180694	TMEM64	-0.0897626	0.636288	0.423733	0.0992933	0.749894	0.0046591
ENSG00000149480	MTA2	-0.230063	0.225054	-0.555371	0.0082739	-0.149711	0.563989											ENSG00000180776	ZDHHC20	-0.0649667	0.754348	0.649877	0.0111595	0.951299	0.000504973
ENSG00000149577	SIDT2	0.0282221	0.912739	-0.421381	0.0439949	-0.51745	0.0130099											ENSG00000180828	BHLHE22	-0.00649346	0.988076	0.516654	0.0289429	0.532207	0.0248455
ENSG00000149658	YTHDF1	-0.378996	0.0233378	-0.438875	0.00614245	-0.00983982	0.970339											ENSG00000181195	PENK	0.048275	0.81401	0.540772	0.00671367	0.371756	0.0776984
ENSG00000151012	SLC7A11	0.000783708	0.999293	-0.588067	0.0159224	-0.573061	0.0194003											ENSG00000181467	RAP2B	0.024166	0.927445	0.574936	0.00313564	0.476571	0.0186257
ENSG00000151376	ME3	-0.130525	0.465626	-0.959839	0.00323059	-0.335113	0.196021											ENSG00000181577	C6orf223	0.687894	0.0125453	2.19749	4.09525e-14	0.907011	0.000343373
ENSG00000151474	FRMD4A	0.0201113	0.950886	-0.407116	0.0915376	-0.479681	0.0445717											ENSG00000182093	GET1	-0.00292061	0.995632	0.769662	0.00310392	0.747257	0.00408892
ENSG00000151500	THYN1	0.134817	0.371241	-0.183805	0.329337	-0.442918	0.00811414											ENSG00000182117	NOP10	-0.103121	0.584052	0.268968	0.317132	0.582571	0.0221564
ENSG00000151552	QDPR	0.0126047	0.971992	-0.439483	0.0551568	-0.481742	0.034649											ENSG00000182141	ZNF708	-0.0115345	0.976925	0.57725	0.0335111	0.605212	0.0227644
ENSG00000151689	INPP1	0.0110173	0.975853	-0.653368	0.000409493	-0.686935	0.000315766											ENSG00000182162	P2RY8	-0.0861483	0.610297	0.444617	0.0171436	0.675658	0.000249948
ENSG00000151725	CENPU	-0.112114	0.499709	-0.693429	0.000138146	-0.404336	0.0401513											ENSG00000182359	KBTBD3	0.0583594	0.778678	0.536825	0.0488866	0.274345	0.304331
ENSG00000152056	AP1S3	-0.0171076	0.958317	-0.455492	0.0375762	-0.381737	0.0898634											ENSG00000182389	CACNB4	0.0332702	0.897669	0.513185	0.0437997	0.357343	0.163844
ENSG00000152082	MZT2B	0.102903	0.54676	-0.287442	0.181389	-0.54729	0.00701122											ENSG00000182578	CSF1R	0.00567948	0.989664	0.675113	0.000527439	0.640113	0.00154716
ENSG00000152117	SMPD4BP	-0.031284	0.90392	-0.688343	0.00244533	-0.535865	0.0202973											ENSG00000182919	C11orf54	0.0114883	0.976666	0.556581	0.0215325	0.48832	0.0446319
ENSG00000152193	OBI1	-0.0432075	0.833698	-0.467785	0.0161033	-0.322152	0.120837											ENSG00000182979	MTA1	-0.0557149	0.796324	0.359765	0.174355	0.573868	0.0279154
ENSG00000152348	ATG10	0.219172	0.217187	-0.0551141	0.849701	-0.411322	0.0402923											ENSG00000183044	ABAT	-0.0736285	0.704862	0.391972	0.141657	0.69021	0.0122198
ENSG00000152439	ZNF773	0.152868	0.412804	-0.187337	0.518722	-0.557634	0.0269535											ENSG00000183077	AFMID	-0.129443	0.481555	0.164704	0.562964	0.484487	0.0427047
ENSG00000152700	SAR1B	-0.292268	0.0915152	-0.505524	0.0030799	-0.110727	0.625556											ENSG00000183098	GPC6	0.00466854	0.993286	0.915454	0.00832905	0.62757	0.0148245
ENSG00000152795	HNRNPDL	-0.268977	0.134992	-0.542973	0.00266678	-0.146839	0.518971											ENSG00000183484	GPR132	-0.0922008	0.609944	0.486242	0.0715663	0.921236	0.00254041
ENSG00000153048	CARHSP1	0.0177386	0.955511	-0.451891	0.0357193	-0.512739	0.0174021											ENSG00000183726	TMEM50A	-0.032565	0.902568	0.480611	0.0682986	0.618274	0.0192489
ENSG00000153140	CETN3	0.46857	0.0331489	0.0056686	0.984549	-0.512965	0.0151167											ENSG00000183808	RBM12B	0.0276719	0.911581	0.382997	0.0412019	0.289498	0.144209
ENSG00000153406	NMRAL1	-0.210701	0.221458	-0.523051	0.00460065	-0.164722	0.466794											ENSG00000183864	TOB2	0.0500837	0.806956	0.483166	0.0179394	0.312825	0.151544
ENSG00000153551	CMTM7	0.0403378	0.853227	-0.405934	0.0625324	-0.544285	0.0114424											ENSG00000184009	ACTG1	0.0548754	0.796877	0.588864	0.0155791	0.362913	0.145361
ENSG00000153574	RPIA	0.0464587	0.820952	-0.343308	0.103616	-0.491538	0.016686											ENSG00000184014	DENND5A	-0.0088028	0.983621	0.551256	0.0313542	0.573329	0.0243758
ENSG00000153815	CMIP	0.0603575	0.746062	-0.246104	0.229239	-0.416488	0.0305937											ENSG00000184117	NIPSNAP1	-0.035493	0.885001	0.518412	0.032682	0.661381	0.00715744
ENSG00000153879	CEBPG	-0.0254253	0.920967	-0.430648	0.0346045	-0.335413	0.114972											ENSG00000184160	ADRA2C	0.158025	0.346337	1.77085	0.000338795	0.415545	0.0953033
ENSG00000153904	DDAH1	0.0341672	0.8904	-0.386616	0.103019	-0.510818	0.0286225											ENSG00000184221	OLIG1	0.0148249	0.966038	1.3297	1.34911e-09	1.18382	7.51242e-08
ENSG00000154370	TRIM11	0.0302682	0.911581	-0.709779	0.00684716	-0.850342	0.00165121											ENSG00000184232	OAF	-0.00359875	0.995101	0.797858	3.78092e-05	0.798576	5.95609e-05
ENSG00000154620	TMSB4Y	-0.42169	0.0847086	-0.545792	0.0327069	0.0135261	0.970339											ENSG00000184402	SS18L1	-0.226312	0.244286	0.0832489	0.781543	0.476074	0.0345427
ENSG00000154743	TSEN2	-0.259529	0.175654	-0.481515	0.0212973	-0.0720189	0.804											ENSG00000184441		-0.112169	0.465626	0.475449	0.0716637	1.06106	0.00112835
ENSG00000154839	SKA1	0.10915	0.529489	-0.32277	0.14216	-0.603306	0.00426017											ENSG00000184481	FOXO4	-0.0764938	0.697474	0.299698	0.243047	0.549769	0.0258404
ENSG00000154928	EPHB1	0.123986	0.496606	-0.190634	0.475794	-0.498494	0.0316277											ENSG00000184500	PROS1	-0.0602468	0.77171	0.406024	0.103802	0.628203	0.0114533
ENSG00000155158	TTC39B	0.237962	0.237519	-0.334032	0.178727	-0.820366	0.000877262											ENSG00000184678	H2BC21	-0.00382849	0.995101	0.869222	0.00159276	0.832772	0.00208212
ENSG00000155287	SLC25A28	-0.149031	0.424919	-0.56724	0.0267476	-0.174817	0.542622											ENSG00000184785	SMIM10	-0.111155	0.523053	0.242457	0.290808	0.518984	0.0142134
ENSG00000155846	PPARGC1B	-0.973981	0.00105812	-0.9934	0.000192801	-0.0308121	0.929142											ENSG00000185015	CA13	-0.0988575	0.599126	0.399589	0.124004	0.748833	0.00535924
ENSG00000156398	SFXN2	-0.346354	0.0914423	-1.23457	5.24185e-09	-0.588715	0.00565652											ENSG00000185100	ADSS1	-0.000477907	0.999293	0.604623	0.0120339	0.587662	0.0154537
ENSG00000156411	ATP5MJ	0.0327061	0.880719	-0.257262	0.159965	-0.353063	0.0462203											ENSG00000185127	C6orf120	-0.200617	0.278232	0.373816	0.0958609	0.792261	0.00032834
ENSG00000156504	PABIR2	-0.102835	0.499709	-0.348474	0.0351933	-0.127334	0.530652											ENSG00000185215	TNFAIP2	0.0091397	0.982822	0.541094	0.0435604	0.467247	0.0717615
ENSG00000156521	TYSND1	-0.0328905	0.898547	-0.506291	0.0450302	-0.354664	0.165946											ENSG00000185291	IL3RA	-0.0192397	0.950886	0.457016	0.037771	0.524656	0.017345
ENSG00000156709	AIFM1	-0.0220921	0.933857	-0.41859	0.0160489	-0.343975	0.0591745											ENSG00000185432	METTL7A	-0.0358016	0.883382	0.919418	0.000289727	1.08951	3.12868e-05
ENSG00000156853	ZNF689	-0.232888	0.19472	-0.696565	0.000214862	-0.289563	0.173489											ENSG00000185507	IRF7	0.0145202	0.969928	0.936279	0.00160679	0.744687	0.00636631
ENSG00000156860	FBRS	-0.00461604	0.993499	-0.421993	0.0271437	-0.400412	0.0402614											ENSG00000185650	ZFP36L1	1.70937	6.81293e-07	3.40147	1.92022e-26	1.22914	1.10514e-05
ENSG00000156873	PHKG2	-0.162763	0.33773	-0.421789	0.0311244	-0.104962	0.677121											ENSG00000185808	PIGP	0.059729	0.76596	0.487139	0.0263761	0.284295	0.22574
ENSG00000156983	BRPF1	-0.0502337	0.799791	-0.584213	0.00159274	-0.415921	0.0337237											ENSG00000185862	EVI2B	-0.0632086	0.722318	0.598891	0.000280469	0.781393	2.8634e-06
ENSG00000157554	ERG	0.195138	0.271553	-0.143671	0.611244	-0.601202	0.0211127											ENSG00000185905	C16orf54	-0.0122054	0.971817	0.748187	3.63259e-05	0.786512	2.61292e-05
ENSG00000157617	C2CD2	-0.159095	0.398814	-0.498996	0.0392271	-0.128435	0.660862											ENSG00000186026	ZNF284	0.0925665	0.624613	0.701013	0.00828798	0.337647	0.193177
ENSG00000157657	ZNF618	-0.0124092	0.97157	-0.664551	0.000224134	-0.608226	0.00125725											ENSG00000186063	AIDA	0.323181	0.147128	1.12878	2.24132e-05	0.407511	0.0953921
ENSG00000157778	PSMG3	-0.0250784	0.927615	-0.816623	0.000460798	-0.66625	0.00461413											ENSG00000186073	CDIN1	0.0507688	0.81401	0.586761	0.0160489	0.372193	0.134249
ENSG00000157916	RER1	-0.0103993	0.977338	-0.695096	5.90693e-05	-0.646867	0.000357323											ENSG00000186184	POLR1D	-0.00597779	0.988508	0.4225	0.0396829	0.438414	0.0340519
ENSG00000157927	RADIL	0.0032505	0.995239	-0.515112	0.0359434	-0.514586	0.0356531											ENSG00000186193	SAPCD2	-0.0859912	0.643913	0.234021	0.352711	0.483554	0.0363431
ENSG00000158186	MRAS	-0.294517	0.101781	-0.840052	1.08827e-06	-0.387274	0.0431131											ENSG00000186205	MTARC1	0.0239097	0.92664	0.550657	0.0025955	0.4599	0.0159731
ENSG00000158258	CLSTN2	0.0358041	0.880487	-0.36634	0.113175	-0.492769	0.0296423											ENSG00000186376	ZNF75D	-0.100989	0.589561	0.332904	0.207062	0.666645	0.0112231
ENSG00000158526	TSR2	-0.043223	0.834348	-0.40937	0.0412019	-0.266259	0.2157											ENSG00000186603	HPDL	-1.29293	0.000577504	-0.0940745	0.776645	0.859364	0.00233957
ENSG00000158545	ZC3H18	-0.0471263	0.808002	-0.410104	0.01825	-0.270575	0.152143											ENSG00000186792	HYAL3	0.087595	0.643126	0.964709	0.000132496	0.563972	0.0196781
ENSG00000158863	FHIP2B	-0.0693475	0.722318	-0.65948	0.0032416	-0.405542	0.0810446											ENSG00000187187	ZNF546	0.0204069	0.950886	0.513024	0.0363151	0.410866	0.0959921
ENSG00000158864	NDUFS2	0.0550444	0.790778	-0.319868	0.184508	-0.505295	0.0293377											ENSG00000187514	PTMA	0.0526296	0.806956	0.595385	0.0132675	0.376839	0.126439
ENSG00000159055	MIS18A	0.0682388	0.689042	-0.215808	0.258346	-0.390469	0.026938											ENSG00000188243	COMMD6	-0.0247164	0.932334	1.17814	5.90693e-05	1.2626	1.50274e-05
ENSG00000159199	ATP5MC1	0.0246339	0.924715	-0.518793	0.00697612	-0.601856	0.00208749											ENSG00000188321	ZNF559	-0.3531	0.129227	0.283785	0.293941	0.969422	0.000938562
ENSG00000159259	CHAF1B	-0.293963	0.135752	-0.475455	0.0205059	-0.050066	0.866424											ENSG00000188419	CHM	0.0499781	0.808226	0.468159	0.0257829	0.296617	0.185592
ENSG00000159352	PSMD4	0.235713	0.156131	-0.0405429	0.87873	-0.385693	0.0306903											ENSG00000188486	H2AX	-0.238609	0.228517	0.0758232	0.809601	0.484272	0.0360701
ENSG00000159423	ALDH4A1	0.329839	0.0914423	-0.106885	0.680859	-0.544899	0.00638166											ENSG00000188641	DPYD	0.0146687	0.964754	0.620159	0.0012283	0.553621	0.00542697
ENSG00000159842	ABR	0.0438734	0.838937	-0.351643	0.182851	-0.526117	0.0421182											ENSG00000188820	CALHM6	0.131131	0.465626	0.896242	0.00413109	0.320167	0.221947
ENSG00000160014	CALM3	0.102842	0.566852	-0.20166	0.430984	-0.473985	0.0362947											ENSG00000188921	HACD4	0.130971	0.452745	0.815781	5.90693e-05	0.454512	0.0327228
ENSG00000160075	SSU72	-0.0462029	0.82857	-0.568344	0.00917013	-0.389224	0.0879325											ENSG00000189042	ZNF567	-0.219426	0.266192	0.169829	0.553077	0.597919	0.0143729
ENSG00000160087	UBE2J2	-0.00821715	0.98343	-0.573768	0.00148502	-0.536165	0.00438283											ENSG00000189212	DPY19L2P1	0.139767	0.410846	0.597497	0.0352959	0.141206	0.614032
ENSG00000160193	WDR4	-0.0587673	0.769764	-0.732703	0.000761639	-0.497528	0.0257372											ENSG00000189266	PNRC2	-0.166958	0.355691	0.195301	0.430984	0.541215	0.0127004
ENSG00000160208	RRP1B	-0.570336	0.00312529	-0.569999	0.0013458	0.0057153	0.985021											ENSG00000196189	SEMA4A	-0.0238254	0.935029	0.591792	0.0344653	0.684623	0.0130099
ENSG00000160214	RRP1	-0.153785	0.395592	-0.547163	0.0123993	-0.195964	0.441606											ENSG00000196369	SRGAP2B	-0.0336874	0.896173	0.428816	0.108708	0.567555	0.0320674
ENSG00000160256	SLX9	0.0449131	0.831558	-0.343805	0.118712	-0.491451	0.0217357											ENSG00000196502	SULT1A1	-0.00791706	0.985015	0.790105	0.0012283	0.802445	0.00123852
ENSG00000160345	PIERCE1	0.0023002	0.997442	-0.536744	0.0437394	-0.521656	0.0449959											ENSG00000196711	ALKAL1	0.0928301	0.614887	0.586555	0.034203	0.228631	0.404127
ENSG00000160392	C19orf47	0.0255329	0.925934	-0.617419	0.00796764	-0.719873	0.00254399											ENSG00000196811	CHRNG	-0.164391	0.309653	0.112396	0.696183	0.5013	0.0360701
ENSG00000160439	RDH13	-0.124809	0.456767	-0.601866	0.00172804	-0.301044	0.156409											ENSG00000196872	CRACDL	-0.202349	0.300177	0.0992749	0.765002	0.52063	0.0446319
ENSG00000160563	MED27	-0.0370222	0.871505	-0.943928	5.88956e-06	-0.753358	0.00040054											ENSG00000196878	LAMB3	-0.0277954	0.919436	0.412435	0.11537	0.520801	0.0444014
ENSG00000160688	FLAD1	-0.0527477	0.796324	-0.516731	0.0138337	-0.332827	0.136594											ENSG00000196975	ANXA4	0.137171	0.457922	1.47384	1.95339e-07	0.78552	0.00169636
ENSG00000160703	NLRX1	0.102661	0.570728	-0.3598	0.125239	-0.6551	0.00444063											ENSG00000197134	ZNF257	-0.150753	0.414577	0.247667	0.371631	0.66118	0.0138313
ENSG00000160753	RUSC1	-0.030691	0.898089	-0.395521	0.0439816	-0.289558	0.163844											ENSG00000197329	PELI1	-0.000709897	0.999293	0.706562	0.00733885	0.67246	0.00983461
ENSG00000160783	PMF1	-0.112843	0.502347	-0.531679	0.00595076	-0.254083	0.242663											ENSG00000197375	SLC22A5	-0.165306	0.371241	0.139387	0.651079	0.545951	0.0381548
ENSG00000160953	PWWP3A	-0.0345009	0.874614	-0.651075	0.000125609	-0.527932	0.00355791											ENSG00000197632	SERPINB2	0.0139996	0.97123	0.511784	0.0363586	0.436232	0.0752563
ENSG00000160957	RECQL4	-0.033346	0.8868	-0.595985	0.0022404	-0.466547	0.0217357											ENSG00000197747	S100A10	0.707514	0.00171872	2.40499	5.03284e-30	1.41177	3.00489e-11
ENSG00000161547	SRSF2	-0.388765	0.0246943	-0.584698	0.000227801	-0.133826	0.521067											ENSG00000197766	CFD	0.0641597	0.708077	0.748249	9.60073e-07	0.558772	0.000732676
ENSG00000161647	MPP3	-0.0220634	0.944387	-0.741189	0.0109025	-0.539829	0.0401574											ENSG00000197822	OCLN	0.0734557	0.662571	0.754395	0.0160214	0.288398	0.232443
ENSG00000161911	TREML1	-0.54718	0.0455073	-1.45519	2.99334e-05	-0.318908	0.226361											ENSG00000197956	S100A6	-0.0161002	0.963604	0.721858	0.0030799	0.781394	0.00166131
ENSG00000161956	SENP3	-0.0396108	0.854552	-0.753858	0.0153353	-0.401594	0.0993514											ENSG00000197961	ZNF121	-0.225712	0.172877	0.0216071	0.935092	0.361304	0.0476625
ENSG00000161996	WDR90	-0.191956	0.296176	-1.38625	1.62317e-09	-0.780602	0.000426172											ENSG00000198270	TMEM116	0.0227794	0.938952	0.619088	0.0270926	0.449942	0.0831902
ENSG00000162063	CCNF	-0.0424196	0.853227	-0.68124	0.0088531	-0.456626	0.0718795											ENSG00000198276	UCKL1	-0.0756836	0.605334	0.212484	0.354292	0.459048	0.0316201
ENSG00000162066	AMDHD2	0.000693705	0.999293	-1.0353	0.00262551	-0.854912	0.0040203											ENSG00000198431	TXNRD1	-0.0533663	0.799791	0.382291	0.107109	0.569096	0.0145301
ENSG00000162231	NXF1	-0.0380837	0.851658	-0.362995	0.0398749	-0.24722	0.194533											ENSG00000198440	ZNF583	-0.418334	0.0837166	0.0136549	0.968173	0.550889	0.0268976
ENSG00000162302	RPS6KA4	0.054111	0.796324	-0.335251	0.162365	-0.519046	0.0251453											ENSG00000198561	CTNND1	0.125428	0.497937	0.594185	0.0125419	0.243479	0.347936
ENSG00000162377	COA7	-0.643077	0.000548276	-0.471644	0.00741827	0.146083	0.507611											ENSG00000198715	GLMP	0.0484982	0.826301	1.0432	0.00066141	0.639417	0.0154265
ENSG00000162384	CZIB	0.0923964	0.586997	-0.389637	0.0524072	-0.635025	0.00119458											ENSG00000198829	SUCNR1	-0.121555	0.499709	0.714494	0.0012589	1.11625	1.83696e-06
ENSG00000162390	ACOT11	0.0575858	0.783409	-0.299818	0.238924	-0.498022	0.0408342											ENSG00000198839	ZNF277	0.000934035	0.999293	0.548934	0.0388702	0.516561	0.0467345
ENSG00000162613	FUBP1	0.00724207	0.985015	-0.475783	0.00628506	-0.495195	0.0056103											ENSG00000198874	TYW1	-0.104059	0.56685	0.22446	0.377377	0.506092	0.029032
ENSG00000162757	C1orf74	0.112996	0.534029	-0.316715	0.195402	-0.629542	0.00754397											ENSG00000198901	PRC1	-0.0199195	0.950886	0.373794	0.101457	0.443706	0.049214
ENSG00000162783	IER5	0.22751	0.225054	-0.404399	0.0605707	-0.84028	6.18623e-05											ENSG00000198912	C1orf174	-0.0409043	0.854638	0.643084	0.024467	0.855893	0.0040203
ENSG00000162882	HAAO	0.102034	0.586997	-0.403065	0.119039	-0.754986	0.00450701											ENSG00000203666	EFCAB2	-0.0301221	0.897647	0.275336	0.142886	0.366313	0.0452813
ENSG00000162910	MRPL55	0.0448043	0.831558	-0.548211	0.00859307	-0.708358	0.000899682											ENSG00000204287	HLA-DRA	0.00734029	0.986488	0.524814	0.0190351	0.482721	0.0334895
ENSG00000163002	NUP35	-0.0594498	0.769418	-0.62926	0.00526078	-0.401427	0.0852988											ENSG00000204387	SNHG32	-0.0419131	0.853953	0.525285	0.0418201	0.707208	0.0072524
ENSG00000163050	COQ8A	-0.642046	0.00161016	-0.245678	0.243412	0.360635	0.0740663											ENSG00000204389	HSPA1A	0.505559	0.0503315	0.67869	0.00773153	0.0454916	0.894667
ENSG00000163053	SLC16A14	0.0162817	0.963065	-0.637565	0.0283029	-0.646583	0.0151167											ENSG00000204472	AIF1	0.0233082	0.93371	0.549259	0.00663012	0.452488	0.0308048
ENSG00000163132	MSX1	-0.0595296	0.776639	-0.567488	0.0346975	-0.304402	0.251649											ENSG00000205133	TRIQK	0.0431294	0.842606	0.828067	0.000250501	0.613179	0.00733632
ENSG00000163257	DCAF16	-0.0825235	0.644819	-0.649634	0.00138639	-0.390847	0.0689283											ENSG00000205250	E2F4	-0.129365	0.454335	0.197097	0.407318	0.491991	0.0190144
ENSG00000163382	NAXE	0.0306057	0.898761	-0.64307	0.000574423	-0.750161	8.22349e-05											ENSG00000205581	HMGN1	0.0323478	0.887531	0.704278	4.22592e-05	0.581872	0.00144982
ENSG00000163430	FSTL1	-0.0286695	0.911586	-0.624642	0.00278118	-0.500173	0.0203585											ENSG00000205808	PLPP6	-0.184994	0.338829	0.136988	0.644854	0.52563	0.0318049
ENSG00000163467	TSACC	0.0978292	0.577634	-0.366854	0.1571	-0.759123	0.00745875											ENSG00000205927	OLIG2	0.043737	0.846215	0.670837	0.0119752	0.434534	0.0920079
ENSG00000163468	CCT3	0.147293	0.362343	-0.278984	0.147292	-0.572507	0.0014773											ENSG00000205930	C21orf62-AS1	0.0540076	0.767664	0.602155	0.0342735	0.266903	0.253648
ENSG00000163472	TMEM79	0.089216	0.635522	-0.328004	0.22148	-0.646386	0.0164151											ENSG00000206559	ZCWPW2	0.151891	0.395592	0.626887	0.0278733	0.154983	0.58837
ENSG00000163482	STK36	0.00937189	0.981887	-0.685153	0.00752275	-0.706051	0.00630663											ENSG00000206560	ANKRD28	-0.142417	0.389907	0.242029	0.241491	0.537647	0.00482598
ENSG00000163528	CHCHD4	-0.0982841	0.56685	-0.47189	0.0191306	-0.214586	0.349882											ENSG00000211697	TRGV5	0.0010083	0.999293	0.605464	0.0260022	0.562106	0.0325672
ENSG00000163539	CLASP2	0.045526	0.816509	-0.331567	0.0842271	-0.467608	0.012575											ENSG00000213185	FAM24B	-0.0400316	0.861022	0.402008	0.131781	0.565787	0.0323496
ENSG00000163624	CDS1	0.123809	0.466274	-0.58139	0.00426986	-0.918362	9.02787e-06											ENSG00000213639	PPP1CB	0.0151097	0.963001	0.344304	0.0405753	0.294989	0.0930433
ENSG00000163684	RPP14	-0.0637271	0.728146	-0.561711	0.00198145	-0.368391	0.0585002											ENSG00000213722	DDAH2	-0.045475	0.82112	0.299782	0.139043	0.438731	0.0248332
ENSG00000163704	PRRT3	0.0402078	0.863651	-0.407882	0.117279	-0.565897	0.0282222											ENSG00000214194	SMIM30	-0.0260265	0.92664	0.728006	0.00793186	0.844571	0.00255101
ENSG00000163705	FANCD2OS	0.138251	0.365499	-0.132401	0.597163	-0.481784	0.0320488											ENSG00000215271	HOMEZ	0.00918344	0.981579	0.713178	0.000761639	0.655647	0.00258058
ENSG00000163781	TOPBP1	-0.0342621	0.866766	-0.473467	0.00159274	-0.371824	0.0204203											ENSG00000218175		0.0409339	0.853104	0.459429	0.0386234	0.306203	0.19012
ENSG00000163811	WDR43	-0.287636	0.107441	-0.648631	0.000194484	-0.231689	0.258934											ENSG00000223551	TMSB4XP4	-0.0442666	0.843601	0.633353	0.0149891	0.842624	0.00190377
ENSG00000163823	CCR1	0.681713	0.00192368	0.0542512	0.858534	-0.596786	0.00399776											ENSG00000224032	EPB41L4A-AS1	-0.0384553	0.851501	0.250789	0.188521	0.363913	0.0465185
ENSG00000163832	ELP6	0.0594662	0.757914	-0.42688	0.036617	-0.612639	0.0024968											ENSG00000224152	BAZ2B-AS1	0.0114322	0.976494	0.742665	0.00159021	0.661436	0.00535924
ENSG00000163909	HEYL	0.0591493	0.774675	-0.357174	0.144106	-0.56205	0.0186012											ENSG00000225377	NRSN2-AS1	0.0332485	0.894698	0.562599	0.0435604	0.351907	0.165946
ENSG00000163913	IFT122	0.0242849	0.927497	-0.369325	0.0820869	-0.451116	0.0319096											ENSG00000225471	TPT1P15	-0.00883629	0.983458	0.517723	0.0384395	0.542027	0.0299848
ENSG00000163935	SFMBT1	0.0128318	0.97157	-0.425414	0.0332517	-0.466004	0.0204789											ENSG00000226360	RPL10AP6	-0.0128024	0.97157	0.414096	0.0439949	0.455197	0.027202
ENSG00000163945	UVSSA	-0.0487686	0.822411	-0.496412	0.04632	-0.300115	0.246989											ENSG00000226674	TEX41	0.0266313	0.921854	0.546607	0.0275224	0.414744	0.0959921
ENSG00000164045	CDC25A	-0.183897	0.315865	-0.493593	0.0238892	-0.125985	0.64365											ENSG00000228399		-0.0035194	0.994391	0.655758	0.0246523	0.498396	0.0243758
ENSG00000164048	ZNF589	-0.170293	0.371241	-0.510042	0.0437536	-0.114073	0.707974											ENSG00000229017	LINC01277	-0.00668689	0.987775	0.603031	0.0344653	0.557022	0.0297707
ENSG00000164062	APEH	0.00047632	0.999293	-0.497572	0.0087007	-0.492363	0.0114823											ENSG00000231528	FAM225A	-0.0749475	0.661929	0.247381	0.342997	0.509604	0.0403408
ENSG00000164087	POC1A	0.0407869	0.858996	-0.420382	0.0923514	-0.578065	0.019849											ENSG00000232788	ITGA6-AS1	0.190892	0.153682	4.9624	6.81883e-06	0.559347	0.0105267
ENSG00000164120	HPGD	0.467513	0.0681827	-0.0716221	0.815047	-0.694852	0.00980101											ENSG00000233452	STXBP5-AS1	-0.0493975	0.819799	0.344348	0.198142	0.53789	0.040545
ENSG00000164236	ANKRD33B	0.0715933	0.71579	-0.514611	0.0333715	-0.77966	0.00163838											ENSG00000234009	RPL5P34	0.0322671	0.90392	0.554815	0.0374587	0.382708	0.141865
ENSG00000164338	UTP15	-0.450355	0.0253098	-0.49723	0.00845853	0.0022264	0.994355											ENSG00000235162	C12orf75	0.68295	0.00969808	1.07154	1.94629e-05	0.220953	0.399079
ENSG00000164465	DCBLD1	0.065856	0.734041	-0.506978	0.0175254	-0.727376	0.000786469											ENSG00000235354	RPS29P16	0.0104355	0.974976	0.76467	0.0156442	0.452553	0.034649
ENSG00000164535	DAGLB	-0.136109	0.431753	-0.471706	0.0252512	-0.160159	0.527499											ENSG00000235453	SMIM27	-0.0185315	0.955739	0.497534	0.0607925	0.566187	0.0308029
ENSG00000164548	TRA2A	-0.0591353	0.756339	-0.407615	0.0378651	-0.229634	0.290839											ENSG00000236104	ZBTB22	-0.0267452	0.921685	0.616237	0.0132675	0.729144	0.00434786
ENSG00000164611	PTTG1	0.023734	0.92664	-0.500811	0.00533889	-0.576822	0.00163614											ENSG00000236154		-0.00989943	0.980871	0.581109	0.0360941	0.590657	0.0264982
ENSG00000164754	RAD21	0.0274228	0.907899	-0.31953	0.0697761	-0.400788	0.021149											ENSG00000237476	LINC01637	-0.217361	0.266192	0.19181	0.516002	0.683241	0.0123515
ENSG00000164877	MICALL2	-0.0679006	0.737798	-0.583056	0.0335209	-0.283201	0.288469											ENSG00000239198	RPL5P22	-0.00420153	0.994152	0.570257	0.0360941	0.556068	0.0345512
ENSG00000164880	INTS1	-0.0508492	0.81401	-0.667556	0.00663012	-0.437048	0.0760213											ENSG00000239213	NCK1-DT	0.101765	0.586997	1.30462	6.33854e-05	0.624398	0.016874
ENSG00000164896	FASTK	0.041488	0.846215	-0.476875	0.0245748	-0.621729	0.00361821											ENSG00000239911	PRKAG2-AS1	-0.22023	0.257324	0.214719	0.401532	0.631472	0.00608734
ENSG00000164920	OSR2	-0.0859431	0.649654	-0.938113	0.000284644	-0.538464	0.0283519											ENSG00000240771	ARHGEF25	-0.139234	0.453169	0.190396	0.519085	0.562978	0.0320984
ENSG00000164933	SLC25A32	-0.490798	0.00405892	-0.603827	9.77355e-05	-0.0881565	0.689975											ENSG00000241685	ARPC1A	-0.0061835	0.9893	0.591374	0.0147342	0.602492	0.0138153
ENSG00000164970	FAM219A	-0.427334	0.0575549	-0.547479	0.0118632	-0.0258447	0.936974											ENSG00000242193	CRYZL2P	-0.0896036	0.637155	0.339501	0.196806	0.645497	0.0134847
ENSG00000165140	FBP1	-0.0456718	0.81401	-0.79856	1.18516e-06	-0.637577	0.000262928											ENSG00000242550	SERPINB10	-0.0146549	0.96697	0.517356	0.0213769	0.568196	0.0123515
ENSG00000165178	NCF1C	0.765645	0.0177085	0.12844	0.683339	-0.53043	0.0431951											ENSG00000243147	MRPL33	0.0815008	0.655067	0.522732	0.0151221	0.273698	0.244285
ENSG00000165238	WNK2	-0.173555	0.356176	-1.04329	0.00172804	-0.326869	0.209318											ENSG00000243317	STMP1	-0.00402659	0.994152	0.5358	0.00292521	0.543493	0.0035313
ENSG00000165271	NOL6	-0.663556	0.00369561	-0.560007	0.00720509	0.0832776	0.76959											ENSG00000243680	RPL37P23	-0.0217745	0.936065	0.451179	0.0830974	0.508399	0.0359837
ENSG00000165283	STOML2	0.0150634	0.964671	-0.390849	0.0749156	-0.441672	0.0436534											ENSG00000244682	FCGR2C	0.901833	0.0164959	3.82819	7.37718e-12	1.18026	0.000454673
ENSG00000165300	SLITRK5	-0.0378469	0.870642	-0.582216	0.00920262	-0.422733	0.0666429											ENSG00000245573	BDNF-AS	0.00940517	0.979186	0.540364	0.045911	0.388426	0.0795287
ENSG00000165609	NUDT5	0.00318683	0.995239	-0.384565	0.0329497	-0.391064	0.0327518											ENSG00000245694	CRNDE	-0.0164306	0.963001	0.549332	0.0131249	0.607809	0.00708753
ENSG00000165626	BEND7	-0.0270616	0.919284	-0.448179	0.0430058	-0.339983	0.139395											ENSG00000245910	SNHG6	0.0123623	0.974539	0.529912	0.0415367	0.450397	0.0786673
ENSG00000165684	SNAPC4	-0.204378	0.291922	-0.631499	0.0086069	-0.191955	0.481394											ENSG00000246082	NUDT16L2P	0.00423679	0.994152	0.491515	0.0462889	0.458161	0.0622203
ENSG00000165688	PMPCA	-0.136905	0.405158	-0.490005	0.00838899	-0.196901	0.3689											ENSG00000246263	UBR5-DT	-0.0397979	0.862948	0.447535	0.0947258	0.615782	0.0217606
ENSG00000165689	ENTR1	-0.552278	0.0154055	-0.340314	0.123128	0.215137	0.372033											ENSG00000246273	SBF2-AS1	0.103974	0.580777	0.749457	0.00332054	0.370175	0.141865
ENSG00000165724	ZMYND19	-0.0394903	0.857332	-0.530013	0.0119858	-0.379289	0.0867857											ENSG00000247157	LINC01252	0.0160466	0.963604	0.620072	0.0305202	0.45535	0.0713844
ENSG00000165732	DDX21	-0.136985	0.425103	-0.632868	0.00175896	-0.301521	0.17515											ENSG00000247596	TWF2	-0.0447924	0.841085	0.483589	0.0636516	0.674683	0.0106297
ENSG00000165782	PIP4P1	-0.0158891	0.963604	-0.441338	0.0382876	-0.374582	0.0879262											ENSG00000249307	LINC01088	0.387105	0.0458988	1.42567	1.64877e-15	0.788544	1.4894e-05
ENSG00000165792	METTL17	-0.176639	0.356176	-0.55906	0.0369613	-0.121641	0.69011											ENSG00000249395	CASC9	-0.00248193	0.996163	0.471767	0.0378203	0.471929	0.0391277
ENSG00000165795	NDRG2	0.0183727	0.956273	-0.506609	0.0483737	-0.57623	0.023742											ENSG00000250317	SMIM20	-0.00464279	0.993596	0.667671	0.00318766	0.671862	0.00376854
ENSG00000165916	PSMC3	0.0352365	0.882614	-0.376054	0.10708	-0.502131	0.0283519											ENSG00000253140	LINC02947	-0.0561837	0.789033	0.530193	0.0510298	0.802152	0.00510681
ENSG00000166024	R3HCC1L	-0.00159357	0.999028	-0.529265	0.0308907	-0.505847	0.0391286											ENSG00000253154		-0.0390588	0.871505	0.400837	0.126785	0.556632	0.0325698
ENSG00000166025	AMOTL1	-0.0767119	0.668044	-0.764366	9.93852e-05	-0.505772	0.0145206											ENSG00000253293	HOXA10	-0.0345927	0.87779	0.3548	0.0697761	0.463956	0.0159728
ENSG00000166068	SPRED1	0.103293	0.582917	-0.479527	0.0686839	-0.881416	0.00184732											ENSG00000253719	ATXN7L3B	-0.0930947	0.609944	0.30152	0.203563	0.56833	0.0120449
ENSG00000166086	JAM3	-0.0657508	0.750617	-0.511768	0.0460655	-0.262322	0.327933											ENSG00000254986	DPP3	-0.122882	0.465626	0.135268	0.590353	0.412278	0.0459567
ENSG00000166123	GPT2	0.594253	0.01742	-0.0814127	0.794695	-0.720568	0.00203506											ENSG00000255112	CHMP1B	-0.327868	0.100047	0.0908524	0.740822	0.533255	0.00974224
ENSG00000166133	RPUSD2	-0.0642593	0.756426	-0.800894	0.00230249	-0.481153	0.0555952											ENSG00000255389		-0.146757	0.37021	0.13849	0.62732	0.514633	0.0360033
ENSG00000166136	NDUFB8	0.0639379	0.721384	-0.499898	0.004151	-0.681969	8.41543e-05											ENSG00000255571	MIR9-3HG	-0.263709	0.160978	0.0329933	0.915537	0.423909	0.0387678
ENSG00000166166	TRMT61A	-0.0455361	0.838153	-0.693132	0.0071331	-0.461177	0.0672672											ENSG00000255857	PXN-AS1	-0.0313802	0.897647	0.495501	0.0654819	0.617364	0.0180603
ENSG00000166401	SERPINB8	0.0277332	0.916167	-0.529056	0.0108091	-0.628229	0.00293466											ENSG00000256073	URB1-AS1	-0.954109	0.00696292	-0.0624575	0.862341	0.713282	0.00957852
ENSG00000166426	CRABP1	0.0288067	0.907472	-0.372958	0.0695923	-0.467836	0.021149											ENSG00000259330	INAFM2	-0.0426814	0.849383	0.379763	0.154131	0.554315	0.0354477
ENSG00000166452	AKIP1	0.160226	0.287158	-0.137945	0.493054	-0.419096	0.0120919											ENSG00000259943	ZMPSTE24-DT	-0.218317	0.247862	0.136174	0.60801	0.520152	0.0161336
ENSG00000166454	ATMIN	0.0424981	0.830958	-0.279724	0.136976	-0.403266	0.025886											ENSG00000260032	NORAD	-0.159669	0.371241	0.140529	0.596178	0.471797	0.0302916
ENSG00000166508	MCM7	-0.0179381	0.955511	-0.520276	0.0187404	-0.437597	0.0533546											ENSG00000260428	SCX	-0.542873	0.0467091	0.0505879	0.873793	0.636187	0.0092991
ENSG00000166848	TERF2IP	0.0746608	0.644819	-0.289991	0.0929179	-0.472154	0.00434424											ENSG00000260837	NA	-0.00941309	0.976925	0.703556	0.0194811	0.532232	0.0145301
ENSG00000166851	PLK1	-0.00525755	0.992099	-0.66592	0.0087007	-0.610572	0.0154922											ENSG00000260876	LINC01229	0.0150957	0.966391	1.15603	7.31715e-06	0.983782	7.87933e-05
ENSG00000166888	STAT6	-0.0653114	0.739538	-0.445337	0.0461356	-0.233538	0.341604											ENSG00000260966		-0.551317	0.0491385	-0.170978	0.569428	0.395963	0.125662
ENSG00000166912	MTMR10	-0.330616	0.11356	-0.516864	0.0167721	-0.0521911	0.866405											ENSG00000260997		0.0234678	0.934585	1.37167	0.000934702	0.778498	0.00680906
ENSG00000167088	SNRPD1	-0.0121752	0.97157	-0.375812	0.0277664	-0.33378	0.0588766											ENSG00000261455	LINC01003	-0.0900251	0.622885	0.440419	0.0541209	0.723442	0.00163614
ENSG00000167280	ENGASE	-0.31886	0.152828	-0.740457	0.00398638	-0.17215	0.546234											ENSG00000261716	H2BC20P	-0.000308958	0.999864	0.602733	0.0201854	0.577383	0.0243758
ENSG00000167333	TRIM68	-0.227746	0.230623	-0.638268	0.00266678	-0.216889	0.376649											ENSG00000263155	MYZAP	-0.346872	0.13037	0.0304576	0.931894	0.560125	0.0337241
ENSG00000167378	IRGQ	-0.71648	0.00309439	-0.4074	0.0695039	0.248516	0.309176											ENSG00000263961	RHEX	0.0450301	0.840101	0.539057	0.0374587	0.335822	0.195952
ENSG00000167487	KLHL26	0.0373635	0.875543	-0.382433	0.117504	-0.520265	0.0302223											ENSG00000265972	TXNIP	-0.126444	0.429029	1.28115	6.44937e-14	1.59838	2.72854e-20
ENSG00000167491	GATAD2A	-0.453345	0.0143711	-0.327366	0.0743535	0.15088	0.482435											ENSG00000266074	BAHCC1	-0.0408734	0.838784	0.464777	0.00877232	0.590369	0.00103701
ENSG00000167513	CDT1	0.0629362	0.730741	-0.346045	0.0715663	-0.523701	0.00511348											ENSG00000266412	NCOA4	-0.0592605	0.769149	0.301518	0.203801	0.493765	0.0296147
ENSG00000167515	TRAPPC2L	0.0507592	0.811968	-0.597625	0.00939375	-0.80072	0.000785009											ENSG00000269044		-0.131133	0.462963	0.219322	0.437536	0.605914	0.0234925
ENSG00000167637	ZNF283	-0.542193	0.018798	-0.338536	0.13121	0.213148	0.386647											ENSG00000271601	LIX1L	0.0152049	0.96697	0.925937	0.00219265	0.721924	0.00844154
ENSG00000167670	CHAF1A	-0.0979893	0.51784	-0.376078	0.0192348	-0.161731	0.397466											ENSG00000272102	NA	-0.0454711	0.835729	0.451542	0.0916501	0.647124	0.0170412
ENSG00000167693	NXN	0.118611	0.503343	-0.359761	0.112781	-0.672386	0.00233957											ENSG00000272182		-0.289368	0.176773	0.0743346	0.83194	0.575259	0.029594
ENSG00000167700	MFSD3	-0.0285821	0.913452	-0.492115	0.0255605	-0.374855	0.100116											ENSG00000272288	ILRUN-AS1	-0.126269	0.496606	0.341228	0.166876	0.692842	0.00469087
ENSG00000167770	OTUB1	0.0195601	0.950886	-0.361562	0.0935539	-0.427638	0.0450834											ENSG00000272335		-0.0457151	0.838153	0.457654	0.0826776	0.650897	0.0149133
ENSG00000167792	NDUFV1	0.0559054	0.781573	-0.596267	0.00533889	-0.800397	0.000249404											ENSG00000272405		-0.0504899	0.797501	0.3351	0.190559	0.531265	0.0334895
ENSG00000167994	RAB3IL1	-0.107322	0.550015	-0.602053	0.00796764	-0.288324	0.241251											ENSG00000272760		-0.0606783	0.758358	0.305893	0.24957	0.535489	0.0391277
ENSG00000168038	ULK4	-0.0363243	0.882473	-0.79059	0.00732633	-0.510592	0.0507318											ENSG00000272842		-0.0610711	0.728271	0.367289	0.142799	0.620577	0.0142703
ENSG00000168066	SF1	-0.0523382	0.787564	-0.561192	0.00231699	-0.390505	0.0462203											ENSG00000273855		0.0160678	0.963604	0.633414	0.0284497	0.458896	0.0675256
ENSG00000168096	ANKS3	-0.599348	0.0341076	-0.539865	0.0406032	0.093859	0.76891											ENSG00000274536	MIR223HG	-0.0770478	0.683463	0.279324	0.246145	0.512641	0.0244338
ENSG00000168137	SETD5	0.0343438	0.875543	-0.303669	0.109143	-0.407729	0.027276											ENSG00000275052	PPP4R3B	-0.00242987	0.995956	0.48737	0.00811697	0.489787	0.00974224
ENSG00000168283	BMI1	0.154561	0.325648	-0.10685	0.63389	-0.391272	0.0285298											ENSG00000276900		-0.147541	0.419971	0.199317	0.495739	0.593386	0.0252527
ENSG00000168389	MFSD2A	-0.016276	0.957596	-0.418573	0.0151029	-0.361895	0.0442947											ENSG00000278133		-0.600946	0.00832404	0.0431354	0.891068	0.656132	0.00186606
ENSG00000168439	STIP1	0.169795	0.321589	-0.300208	0.151072	-0.639269	0.00119458											ENSG00000279692		-0.503949	0.0565788	0.0530257	0.870714	0.649369	0.0105267
ENSG00000168476	REEP4	-0.0257057	0.921582	-0.58349	0.00584326	-0.471546	0.0304595
ENSG00000168487	BMP1	0.0345834	0.890352	-0.385525	0.119019	-0.514123	0.0340311
ENSG00000168488	ATXN2L	-0.0556956	0.784881	-1.21218	0.00160032	-0.545321	0.0357457
ENSG00000168528	SERINC2	-0.00551024	0.991244	-0.747553	0.00515568	-0.673007	0.00983461
ENSG00000168671	UGT3A2	0.0577007	0.784881	-0.524213	0.0432844	-0.770155	0.00416745
ENSG00000168765	GSTM4	-0.0281376	0.919284	-0.587738	0.0191196	-0.441997	0.0773816
ENSG00000168803	ADAL	-0.0787308	0.644859	-0.701423	7.7984e-05	-0.466771	0.0145628
ENSG00000168924	LETM1	-0.0360137	0.873872	-0.572741	0.00347669	-0.436767	0.0330859
ENSG00000168961	LGALS9	-0.00807263	0.984561	-0.588536	0.0142606	-0.533638	0.0271184
ENSG00000169016	E2F6	-0.469102	0.0407288	-0.510975	0.0187404	0.023907	0.941793
ENSG00000169084	DHRSX	0.0606019	0.756339	-0.437509	0.0378905	-0.631402	0.00258723
ENSG00000169087	HSPBAP1	-0.347034	0.130806	-0.643978	0.0112886	-0.0935198	0.76779
ENSG00000169093	ASMTL	-0.340603	0.094138	-0.704638	0.000469943	-0.214074	0.36742
ENSG00000169189	NSMCE1	0.36798	0.0681827	-0.0377872	0.901836	-0.492437	0.0145628
ENSG00000169398	PTK2	-0.0471717	0.831558	-0.614206	0.0166497	-0.393123	0.124232
ENSG00000169684	CHRNA5	-0.0263566	0.925209	-0.553333	0.037771	-0.405171	0.119276
ENSG00000169689	CENPX	-0.243843	0.19472	-0.674902	0.000821463	-0.247658	0.281034
ENSG00000169696	ASPSCR1	-0.0482057	0.826301	-0.945155	0.000417581	-0.637074	0.0115994
ENSG00000169718	DUS1L	-0.00448495	0.993596	-0.591256	0.00365649	-0.562496	0.0072524
ENSG00000169727	GPS1	-0.0128891	0.971817	-0.560654	0.0129112	-0.492959	0.0319068
ENSG00000169738	DCXR	0.0663816	0.730536	-0.410388	0.0603835	-0.621516	0.00402978
ENSG00000169851	PCDH7	-0.0451099	0.831558	-0.621753	0.00335778	-0.44407	0.04367
ENSG00000170100	ZNF778	0.000229253	0.999973	-0.563942	0.0396332	-0.52512	0.0452573
ENSG00000170265	ZNF282	-0.00819124	0.983764	-0.538298	0.0118419	-0.494555	0.0237004
ENSG00000170340	B3GNT2	0.0718286	0.674892	-0.394828	0.0316676	-0.589432	0.0011221
ENSG00000170364	SETMAR	-0.0997	0.589561	-0.49487	0.0396332	-0.199374	0.461065
ENSG00000170430	MGMT	0.0534042	0.79962	-0.573028	0.0118419	-0.77915	0.000911817
ENSG00000170468	RIOX1	-0.280819	0.150883	-0.554049	0.00622773	-0.125595	0.627972
ENSG00000170515	PA2G4	-0.0791547	0.650582	-0.572093	0.00292521	-0.33972	0.101996
ENSG00000170545	SMAGP	0.236409	0.244763	-0.133313	0.669585	-0.613315	0.0216466
ENSG00000170631	ZNF16	0.0598209	0.763712	-0.250795	0.283786	-0.435066	0.0467295
ENSG00000170684	ZNF296	-0.0771908	0.693691	-1.02611	0.00016607	-0.601733	0.0164276
ENSG00000170855	TRIAP1	-0.0619631	0.76596	-0.51824	0.0369613	-0.283352	0.276402
ENSG00000170881	RNF139	-0.0401521	0.837699	-0.380471	0.0220524	-0.262911	0.143777
ENSG00000170915	PAQR8	-0.0832503	0.628463	-0.502745	0.0087007	-0.272235	0.197951
ENSG00000171408	PDE7B	-0.0651425	0.729192	-0.569323	0.00392178	-0.360427	0.0879262
ENSG00000171456	ASXL1	-0.0312104	0.891724	-0.437503	0.0117223	-0.335786	0.0680002
ENSG00000171757	LRRC34	0.156622	0.403734	-0.569602	0.0203403	-1.06041	5.51112e-05
ENSG00000171793	CTPS1	-0.522035	0.00150248	-0.881425	1.03977e-09	-0.310502	0.0680088
ENSG00000171865	RNASEH1	-0.543813	0.00559139	-0.477146	0.00912885	0.0720519	0.779166
ENSG00000171960	PPIH	-0.00114232	0.999293	-0.552895	0.00961253	-0.537255	0.0139521
ENSG00000172009	THOP1	-0.0356022	0.87247	-0.523198	0.00485713	-0.398103	0.0416719
ENSG00000172046	USP19	-0.0459599	0.834631	-0.552847	0.0262348	-0.354458	0.161716
ENSG00000172301	COPRS	0.0769243	0.661929	-0.208346	0.352477	-0.417525	0.0402614
ENSG00000172336	POP7	-0.0341893	0.892393	-0.86806	0.000515039	-0.653474	0.00769973
ENSG00000172375	C2CD2L	-0.0304809	0.904	-0.437874	0.0395074	-0.322823	0.147486
ENSG00000172500	FIBP	0.0537113	0.796324	-0.387138	0.0916501	-0.570284	0.011423
ENSG00000172766	NAA16	-0.577475	0.011148	-0.359429	0.0988856	0.210648	0.38215
ENSG00000172954	LCLAT1	-0.0999311	0.546965	-0.388785	0.0445802	-0.145995	0.531702
ENSG00000172965	MIR4435-2HG	0.032348	0.898934	-0.398949	0.0990465	-0.519555	0.029374
ENSG00000173214	MFSD4B	0.0175832	0.958117	-0.517762	0.0294735	-0.581896	0.0147677
ENSG00000173320	STOX2	-0.222263	0.263196	-0.934663	0.000289	-0.367849	0.142619
ENSG00000173457	PPP1R14B	0.0599424	0.739538	-0.290604	0.113175	-0.452062	0.0100785
ENSG00000173638	SLC19A1	-0.0721424	0.689207	-0.749663	6.90109e-05	-0.509845	0.0106989
ENSG00000173641	HSPB7	-0.0367779	0.880719	-0.556464	0.0395891	-0.361545	0.166982
ENSG00000173692	PSMD1	-0.0872817	0.582473	-0.530719	0.000870253	-0.317472	0.0705685
ENSG00000173809	TDRD12	0.114727	0.4102	-0.248569	0.242155	-0.596092	0.00715744
ENSG00000173933	RBM4	-0.651127	0.0191381	-0.388077	0.126519	0.231087	0.396098
ENSG00000174307	PHLDA3	0.159865	0.400925	-0.16309	0.589409	-0.546382	0.0334895
ENSG00000174365	SNHG11	-0.0148667	0.966293	-1.30771	7.28228e-08	-1.14101	1.83696e-06
ENSG00000174684	B4GAT1	0.140235	0.432113	-0.223048	0.3694	-0.549857	0.0142703
ENSG00000174791	RIN1	-0.0559299	0.787564	-0.692938	0.00291846	-0.457276	0.0530565
ENSG00000174886	NDUFA11	0.0815913	0.614887	-0.41759	0.0134989	-0.621549	0.000187889
ENSG00000174917	MICOS13	0.0515023	0.808099	-0.42031	0.0717671	-0.603589	0.0092991
ENSG00000175193	PARL	-0.0398169	0.853953	-0.438265	0.0401211	-0.295139	0.191845
ENSG00000175213	ZNF408	0.00842202	0.983714	-0.536074	0.0164446	-0.560032	0.0135031
ENSG00000175334	BANF1	0.10247	0.504289	-0.257681	0.150688	-0.482527	0.00411213
ENSG00000175416	CLTB	0.0434726	0.836897	-0.532725	0.0100655	-0.686281	0.00115238
ENSG00000175455	CCDC14	-0.0387692	0.851658	-0.717558	2.85306e-05	-0.576211	0.00159089
ENSG00000175581	MRPL48	0.0178	0.95181	-0.365317	0.0485064	-0.420213	0.0225283
ENSG00000175591	P2RY2	-0.0658789	0.739497	-0.614742	0.0055493	-0.377543	0.102835
ENSG00000175756	AURKAIP1	0.0307515	0.896173	-0.300217	0.110162	-0.393533	0.0320674
ENSG00000175782	SLC35E3	-0.737781	0.000357377	-0.431954	0.0288675	0.249518	0.253313
ENSG00000175906	ARL4D	0.126772	0.494353	-0.238694	0.367112	-0.569349	0.0191324
ENSG00000176014	TUBB6	-0.0140654	0.966403	-0.482181	0.00886835	-0.426866	0.0257372
ENSG00000176022	B3GALT6	-0.229125	0.147128	-0.463721	0.00339739	-0.126078	0.537785
ENSG00000176058	TPRN	-0.000528129	0.999293	-0.53892	0.0335209	-0.517096	0.0401359
ENSG00000176105	YES1	0.00900667	0.981887	-0.442879	0.0437997	-0.470175	0.0327518
ENSG00000176155	CCDC57	0.0338145	0.896227	-0.55909	0.0263241	-0.701368	0.00616797
ENSG00000176749	CDK5R1	0.116156	0.534029	-0.35825	0.169301	-0.727076	0.00568631
ENSG00000177084	POLE	-0.0730281	0.706637	-0.633844	0.00661609	-0.366548	0.130024
ENSG00000177192	PUS1	-0.662718	0.00203147	-0.523862	0.00818935	0.112439	0.66413
ENSG00000177352	CCDC71	0.0179656	0.953601	-0.511095	0.0100655	-0.571302	0.00484726
ENSG00000177479	ARIH2	-0.0812533	0.619041	-0.429685	0.0125651	-0.224975	0.248902
ENSG00000177556	ATOX1	0.0801267	0.640196	-0.301295	0.133179	-0.513689	0.007289
ENSG00000177646	ACAD9	0.048368	0.811816	-0.310324	0.138561	-0.460118	0.0224468
ENSG00000177700	POLR2L	0.0257758	0.920727	-0.384982	0.0605707	-0.470656	0.0205064
ENSG00000177791	MYOZ1	-0.0102377	0.980462	-0.631174	0.0120739	-0.556143	0.0262368
ENSG00000177830	CHID1	0.0626132	0.756966	-0.412468	0.0813195	-0.630505	0.00741363
ENSG00000177873	ZNF619	0.0422919	0.849971	-0.395959	0.104035	-0.55169	0.0214792
ENSG00000178057	NDUFAF3	0.0417398	0.838428	-0.321112	0.110036	-0.450498	0.0210254
ENSG00000178188	SH2B1	-0.327738	0.0989997	-0.694398	0.00039574	-0.219356	0.340398
ENSG00000178307	TMEM11	-0.0848509	0.620314	-0.435728	0.0245748	-0.209352	0.342399
ENSG00000178741	COX5A	0.0461831	0.81401	-0.299906	0.123128	-0.436861	0.0202626
ENSG00000178773	CPNE7	-0.0260376	0.925209	-0.853684	0.000978377	-0.668766	0.00796947
ENSG00000178896	EXOSC4	-0.00398186	0.994152	-0.430473	0.0448005	-0.408028	0.0602717
ENSG00000178921	PFAS	-0.155297	0.371624	-0.5774	0.00461156	-0.235975	0.308639
ENSG00000178950	GAK	-0.00203102	0.998151	-0.432663	0.0494811	-0.416994	0.0600957
ENSG00000178952	TUFM	0.0303533	0.906767	-0.414165	0.0807616	-0.526873	0.0248455
ENSG00000178982	EIF3K	0.0549857	0.788193	-0.401525	0.0749129	-0.587769	0.00845337
ENSG00000178999	AURKB	0.00282093	0.995632	-0.559642	0.0202009	-0.556428	0.0214981
ENSG00000179041	RRS1	-0.754681	8.85812e-05	-0.527705	0.00412964	0.17902	0.420946
ENSG00000179115	FARSA	-0.0219475	0.93663	-0.605708	0.00140177	-0.515208	0.00917236
ENSG00000179151	EDC3	-0.013132	0.971707	-0.623647	0.00920262	-0.543158	0.0243758
ENSG00000179271	GADD45GIP1	0.0582843	0.76444	-0.306562	0.146896	-0.481472	0.0175856
ENSG00000179361	ARID3B	0.0724425	0.713413	-0.370109	0.138561	-0.618983	0.0118664
ENSG00000179409	GEMIN4	-0.0291791	0.904193	-0.455479	0.0115749	-0.35573	0.0614391
ENSG00000179598	PLD6	-0.113868	0.534029	-0.544394	0.0212177	-0.222493	0.397576
ENSG00000179673	RPRML	0.159525	0.363372	-0.472327	0.0762504	-1.21143	0.000542352
ENSG00000179820	MYADM	0.599316	0.000902408	0.0557692	0.828236	-0.527852	0.00255101
ENSG00000179943	FIZ1	0.0251987	0.929965	-0.493736	0.0594675	-0.595785	0.0221321
ENSG00000179950	PUF60	0.0220882	0.938516	-0.511353	0.0186282	-0.59115	0.00727003
ENSG00000180104	EXOC3	0.614268	0.00945777	0.0793687	0.790533	-0.523102	0.0173019
ENSG00000180353	HCLS1	0.0767112	0.677134	-0.44576	0.0411745	-0.687645	0.00160301
ENSG00000180530	NRIP1	0.0934803	0.604778	-0.198756	0.430984	-0.451511	0.0431131
ENSG00000180834	MAP6D1	-0.0927838	0.620314	-0.572196	0.0353901	-0.229371	0.405335
ENSG00000180902	D2HGDH	-0.0942137	0.617439	-0.519702	0.0367324	-0.220017	0.41956
ENSG00000181019	NQO1	0.0213637	0.941617	-0.447961	0.0316936	-0.520885	0.0127281
ENSG00000181026	AEN	-1.0358	9.68101e-09	-1.35501	2.05574e-14	-0.233826	0.264546
ENSG00000181045	SLC26A11	0.0898289	0.635692	-0.232547	0.401532	-0.509629	0.0446082
ENSG00000181135	ZNF707	-0.108182	0.541058	-0.517496	0.0171887	-0.226462	0.357502
ENSG00000181274	FRAT2	-0.394379	0.0490595	-0.364394	0.0690618	0.095388	0.708952
ENSG00000181396	OGFOD3	-0.0159973	0.963001	-0.413782	0.0445057	-0.35027	0.0997046
ENSG00000181450	ZNF678	-0.0534404	0.790778	-0.429619	0.0436996	-0.252913	0.274893
ENSG00000181472	ZBTB2	-0.237432	0.176275	-0.406901	0.0329497	-0.0402235	0.886048
ENSG00000181649	PHLDA2	0.54104	0.00977204	-0.37543	0.0640467	-1.01345	2.10096e-07
ENSG00000181817	LSM10	0.00640874	0.98776	-0.33963	0.0596094	-0.357284	0.049035
ENSG00000181896	ZNF101	0.0231585	0.934585	-0.352327	0.108369	-0.43153	0.0458597
ENSG00000182054	IDH2	0.0305327	0.896918	-0.377826	0.037771	-0.471375	0.00922861
ENSG00000182154	MRPL41	0.0290493	0.911581	-0.395032	0.0768535	-0.497517	0.0243758
ENSG00000182307	C8orf33	-0.16143	0.348292	-0.543901	0.00527973	-0.210709	0.352698
ENSG00000182324	KCNJ14	-0.435642	0.0831162	-0.81948	0.00886835	-0.0706626	0.822241
ENSG00000182326	C1S	0.0205208	0.950886	-0.571558	0.035376	-0.648449	0.0159731
ENSG00000182405	PGBD4	-0.285519	0.1747	-0.521538	0.028023	-0.0585055	0.858232
ENSG00000182511	FES	0.0162412	0.963001	-0.468646	0.026719	-0.523593	0.0139657
ENSG00000182541	LIMK2	-0.148306	0.4102	-0.608586	0.00578662	-0.250099	0.307485
ENSG00000182687	GALR2	0.066827	0.741178	-0.700469	0.0145208	-1.08095	0.000686424
ENSG00000182810	DDX28	-0.168804	0.33773	-0.909925	4.7858e-06	-0.496716	0.0172
ENSG00000182841	RRP7BP	-0.168514	0.371241	-0.585449	0.0317612	-0.139721	0.638834
ENSG00000182872	RBM10	0.147066	0.348836	-0.217527	0.259835	-0.498917	0.00433543
ENSG00000182944	EWSR1	-0.30292	0.0887779	-0.591386	0.000573601	-0.177164	0.403502
ENSG00000183011	NAA38	0.047807	0.81401	-0.315591	0.14402	-0.467496	0.0246253
ENSG00000183048	SLC25A10	-0.0501028	0.81401	-0.579181	0.0110456	-0.381374	0.107695
ENSG00000183049	CAMK1D	0.0845789	0.644819	-0.46482	0.0376967	-0.732489	0.00113438
ENSG00000183199	HSP90AB3P	0.377924	0.0953703	-0.0147448	0.965594	-0.511595	0.0303338
ENSG00000183207	RUVBL2	0.0111262	0.97589	-0.395525	0.0575772	-0.430624	0.038558
ENSG00000183520	UTP11	-0.0692596	0.686033	-0.672684	4.13794e-05	-0.470879	0.008111
ENSG00000183527	PSMG1	-0.0493739	0.81401	-0.487242	0.0314949	-0.305266	0.200141
ENSG00000183617	MRPL54	0.118976	0.499709	-0.207979	0.396239	-0.497685	0.0223309
ENSG00000183665	TRMT12	-0.412717	0.0467091	-0.285398	0.182734	0.184639	0.434019
ENSG00000183684	ALYREF	0.0132326	0.97157	-0.384394	0.0752072	-0.428042	0.0472832
ENSG00000183779	ZNF703	0.340178	0.126871	-0.169759	0.550985	-0.686881	0.00463022
ENSG00000183891	TTC32	0.00420386	0.994152	-0.699082	0.00111209	-0.702177	0.0014527
ENSG00000184058	TBX1	0.00987422	0.981216	-0.604239	0.0216328	-0.62772	0.0161962
ENSG00000184060	ADAP2	-0.0461015	0.822029	-0.5968	0.00267233	-0.428963	0.0396185
ENSG00000184164	CRELD2	0.152402	0.349639	-0.286638	0.141657	-0.589209	0.00125725
ENSG00000184216	IRAK1	-0.000634037	0.999293	-0.454536	0.0362972	-0.443889	0.0431131
ENSG00000184220	CMSS1	-0.029442	0.905318	-0.457878	0.0204802	-0.350426	0.0914651
ENSG00000184602	SNN	-0.104147	0.560554	-0.48708	0.0308081	-0.20009	0.438519
ENSG00000184613	NELL2	-0.235205	0.250892	-0.541843	0.0368162	-0.0769384	0.815062
ENSG00000184661	CDCA2	-0.108223	0.502347	-0.467847	0.00875695	-0.216358	0.292363
ENSG00000184897	H1-10	-0.0817312	0.618481	-0.484728	0.00442826	-0.275701	0.144493
ENSG00000184983	NDUFA6	0.029366	0.905065	-0.32768	0.0996216	-0.421247	0.0308051
ENSG00000184990	SIVA1	0.00557904	0.989473	-0.346477	0.0579128	-0.361485	0.0495077
ENSG00000185112	FAM43A	0.576974	0.0163014	-0.00211723	0.995243	-0.599241	0.00754397
ENSG00000185163	DDX51	-0.542121	0.00677521	-0.789376	9.66193e-06	-0.193104	0.382968
ENSG00000185298	CCDC137	-0.197492	0.260583	-0.85755	7.10195e-06	-0.441982	0.0306748
ENSG00000185324	CDK10	-0.127116	0.487999	-0.735025	0.00180716	-0.354192	0.145349
ENSG00000185504	FAAP100	-0.0184098	0.953978	-0.582349	0.00837758	-0.492882	0.0293377
ENSG00000185608	MRPL40	0.046697	0.81401	-0.425253	0.0261012	-0.569919	0.0027262
ENSG00000185721	DRG1	0.02247	0.934585	-0.442928	0.0188399	-0.515308	0.00692136
ENSG00000185818	NAT8L	0.0359098	0.885438	-0.603893	0.0260022	-0.770797	0.00555034
ENSG00000185838	GNB1L	-0.00870346	0.983714	-0.651427	0.0205059	-0.548048	0.0374541
ENSG00000187122	SLIT1	0.0750778	0.705549	-0.542944	0.0360941	-0.859202	0.00165121
ENSG00000187193	MT1X	0.0269233	0.920967	-0.572628	0.0222056	-0.683705	0.00715744
ENSG00000187522	HSPA14	-0.170517	0.345625	-0.602976	0.00433143	-0.234067	0.327577
ENSG00000187531	SIRT7	-0.0321404	0.888321	-0.529529	0.00270551	-0.418164	0.0244338
ENSG00000187778	MCRS1	-0.00327516	0.995239	-0.551399	0.0319906	-0.513946	0.0432572
ENSG00000187796	CARD9	-0.0479392	0.81401	-0.530777	0.00859307	-0.362426	0.0913148
ENSG00000187840	EIF4EBP1	0.123282	0.499709	-0.200974	0.451746	-0.51367	0.029373
ENSG00000187951		-0.65678	0.00945777	-0.30469	0.204648	0.31107	0.19882
ENSG00000188002	PDCD6P1	-0.00708648	0.986488	-0.680316	0.00050851	-0.639236	0.00163614
ENSG00000188064	WNT7B	0.118439	0.496606	-0.506678	0.0153935	-0.828449	7.57095e-05
ENSG00000188070	ZFTA	-0.025246	0.924715	-0.580021	0.00609588	-0.470437	0.0307945
ENSG00000188130	MAPK12	-0.0250394	0.924159	-0.596655	0.0031103	-0.490977	0.0189976
ENSG00000188603	CLN3	0.199593	0.278193	-0.080152	0.787989	-0.445024	0.0444896
ENSG00000188677	PARVB	-0.00835346	0.983029	-0.452392	0.0164923	-0.417037	0.0320488
ENSG00000188690	UROS	0.0365467	0.869848	-0.289743	0.17137	-0.406559	0.0462203
ENSG00000188807	TMEM201	-0.114212	0.529578	-0.563525	0.0152419	-0.241095	0.3459
ENSG00000188878	FBF1	-0.0571676	0.786459	-1.03388	0.00177188	-0.547685	0.0376
ENSG00000188938	FAM120AOS	0.0384445	0.848307	-0.278107	0.123128	-0.388616	0.0259934
ENSG00000189007	ADAT2	-0.611738	0.0152346	-0.960686	4.98367e-05	-0.208099	0.42745
ENSG00000189079	ARID2	-0.283629	0.105587	-0.423829	0.0183087	-0.0360718	0.894064
ENSG00000189091	SF3B3	0.0639868	0.713413	-0.191408	0.328466	-0.358574	0.0452573
ENSG00000189159	JPT1	0.0463764	0.806435	-0.330179	0.0485257	-0.456395	0.00535924
ENSG00000189306	RRP7A	-0.0623346	0.739497	-0.896424	8.20445e-07	-0.666677	0.000503895
ENSG00000189362	NEMP2	0.252606	0.207859	-0.151814	0.587571	-0.584434	0.0113934
ENSG00000196092	PAX5	-0.0351548	0.889852	-0.741671	0.00983638	-0.489041	0.0602717
ENSG00000196141	SPATS2L	0.358614	0.0387142	-0.127324	0.551264	-0.553719	0.00103701
ENSG00000196365	LONP1	0.163863	0.386289	-0.181046	0.525124	-0.554713	0.0233472
ENSG00000196460	RFX8	-0.686989	0.00308003	-0.677712	0.0012283	0.00343614	0.993141
ENSG00000196476	C20orf96	-0.0484699	0.815403	-0.622241	0.0047075	-0.429972	0.0584613
ENSG00000196510	ANAPC7	-0.0715896	0.6697	-0.388923	0.0262509	-0.202406	0.307768
ENSG00000196544	BORCS6	0.499197	0.0282324	0.0462762	0.886934	-0.489297	0.0242767
ENSG00000196628	TCF4	0.0464263	0.804581	-0.259327	0.124282	-0.382865	0.0185738
ENSG00000196652	ZKSCAN5	0.105313	0.548693	-0.216026	0.374509	-0.486954	0.0260258
ENSG00000196655	TRAPPC4	-0.00283771	0.995619	-0.477642	0.0275229	-0.457532	0.0370656
ENSG00000196739	COL27A1	-0.25403	0.221458	-0.768227	0.0030799	-0.227672	0.404127
ENSG00000196756	SNHG17	-0.193588	0.298483	-0.908745	5.18681e-05	-0.430607	0.0602133
ENSG00000196924	FLNA	-0.475693	0.0125573	-0.450002	0.0121757	0.0519115	0.844447
ENSG00000196935	SRGAP1	-0.0702834	0.72437	-0.746769	0.0112886	-0.360957	0.164007
ENSG00000197061	H4C3	0.324482	0.104424	-0.0289634	0.925489	-0.463862	0.0264725
ENSG00000197157	SND1	0.103957	0.548693	-0.285427	0.20344	-0.555343	0.00878705
ENSG00000197299	BLM	-0.0615998	0.728627	-0.362206	0.0389329	-0.195832	0.323485
ENSG00000197345	MRPL21	0.0181216	0.950974	-0.671658	8.56253e-05	-0.730395	3.26548e-05
ENSG00000197451	HNRNPAB	-0.0554098	0.78656	-0.541396	0.014679	-0.339459	0.146958
ENSG00000197702	PARVA	0.00353247	0.995101	-0.45192	0.0378266	-0.457498	0.0370507
ENSG00000197785	ATAD3A	-0.0993759	0.584052	-1.05845	5.18532e-06	-0.648874	0.00459017
ENSG00000197857	ZNF44	0.0326982	0.894943	-0.360364	0.108062	-0.472965	0.0312826
ENSG00000197858	GPAA1	0.088425	0.62492	-0.304408	0.190559	-0.558383	0.0117501
ENSG00000197879	MYO1C	0.0183656	0.955511	-0.42242	0.0918351	-0.489875	0.0481424
ENSG00000197903	H2BC12	-0.0211413	0.942219	-0.785499	0.0143455	-0.464862	0.0477074
ENSG00000197933	ZNF823	0.0335605	0.894943	-0.42805	0.0761112	-0.553844	0.0208927
ENSG00000198133	TMEM229B	0.0672746	0.739538	-0.645518	0.00835678	-0.933466	0.000294173
ENSG00000198208	RPS6KL1	-0.0511671	0.806051	-0.984124	0.00527054	-0.456727	0.0661409
ENSG00000198355	PIM3	-0.0189251	0.951705	-0.495758	0.0234705	-0.412445	0.0653281
ENSG00000198356	GET3	0.0989584	0.580106	-0.423454	0.055867	-0.708447	0.00123852
ENSG00000198373	WWP2	0.00793772	0.984561	-0.469514	0.0431651	-0.492387	0.0337241
ENSG00000198417	MT1F	0.0474898	0.81401	-0.309125	0.127561	-0.453682	0.020648
ENSG00000198466	ZNF587	-0.248326	0.198114	-0.509564	0.0171756	-0.0968764	0.730154
ENSG00000198554	WDHD1	-0.0875371	0.606565	-0.400057	0.0395137	-0.173364	0.445753
ENSG00000198786	MT-ND5	0.0405904	0.858912	-0.352681	0.156279	-0.501696	0.0384983
ENSG00000198804	MT-CO1	0.0420712	0.852741	-0.390393	0.114984	-0.548137	0.0244338
ENSG00000198824	CHAMP1	-0.12539	0.410846	-0.375875	0.0275229	-0.122131	0.566666
ENSG00000198840	MT-ND3	0.257414	0.217876	-0.119211	0.705827	-0.586419	0.0212182
ENSG00000198863	RUNDC1	0.204479	0.251242	-0.131378	0.600054	-0.486906	0.0159731
ENSG00000198945	L3MBTL3	0.0703338	0.705673	-0.680379	0.000947046	-0.924479	1.10688e-05
ENSG00000199377	RNU5F-1	0.0391407	0.868413	-0.381818	0.151679	-0.538936	0.0401805
ENSG00000200090	Y_RNA	-1.61559	0.00371585	-0.732846	0.0180654	0.134408	0.556862
ENSG00000201674	U3	-0.0283848	0.919284	-0.604676	0.0257829	-0.432432	0.0960271
ENSG00000202314	SNORD6	-1.02442	0.00568662	-1.87689	8.38796e-06	-0.24551	0.362695
ENSG00000204138	PHACTR4	-0.0414556	0.838153	-0.412413	0.0253442	-0.281142	0.156141
ENSG00000204227	RING1	0.0257038	0.925934	-0.542434	0.0242625	-0.644541	0.00811414
ENSG00000204356	NELFE	0.0881986	0.592374	-0.264446	0.18104	-0.483526	0.00911819
ENSG00000204394	VARS1	0.00578574	0.990007	-0.597045	0.00721608	-0.608923	0.00727003
ENSG00000204463	BAG6	0.0322463	0.897647	-0.328681	0.15251	-0.440658	0.048874
ENSG00000204516	MICB	0.15586	0.398066	-0.261072	0.293254	-0.620983	0.00741363
ENSG00000204536	CCHCR1	0.0256041	0.927958	-0.428857	0.0988856	-0.528584	0.0393428
ENSG00000204568	MRPS18B	0.0357822	0.87247	-0.391591	0.0466432	-0.506229	0.00942208
ENSG00000204569	PPP1R10	0.0326836	0.896918	-0.436537	0.0551203	-0.555276	0.0140164
ENSG00000204682	MIR1915HG	0.0961505	0.558349	-0.285668	0.151072	-0.520859	0.00555034
ENSG00000204843	DCTN1	0.127446	0.492079	-0.38838	0.114949	-0.758222	0.00221263
ENSG00000204946	ZNF783	0.0989687	0.595728	-0.465252	0.0642873	-0.811434	0.0017898
ENSG00000205208	C4orf46	-0.111438	0.507371	-0.44455	0.0260022	-0.17483	0.457462
ENSG00000205356	TECPR1	-0.0651808	0.74696	-0.669581	0.00504863	-0.408291	0.0930847
ENSG00000205629	LCMT1	-0.0138135	0.969052	-0.430424	0.0367324	-0.373547	0.0776395
ENSG00000205659	LIN52	0.0514041	0.799791	-0.34954	0.103401	-0.513293	0.0140164
ENSG00000205683	DPF3	0.00585545	0.990351	-0.590651	0.0216325	-0.595291	0.0200807
ENSG00000205903	ZNF316	-0.00622616	0.988791	-0.73475	0.00310392	-0.672108	0.00692136
ENSG00000206052	DOK6	0.020728	0.943811	-0.446424	0.0842271	-0.495268	0.0391277
ENSG00000206149	HERC2P9	-0.105683	0.572768	-0.60721	0.0167702	-0.263204	0.323696
ENSG00000211459	MT-RNR1	0.0535834	0.777126	-0.482779	0.00750506	-0.64416	0.000376789
ENSG00000212907	MT-ND4L	0.042435	0.843601	-0.788828	0.000282468	-0.96535	1.64459e-05
ENSG00000213080		0.148801	0.425103	-0.184448	0.528	-0.54994	0.0297807
ENSG00000213465	ARL2	0.0805981	0.661629	-0.364774	0.112743	-0.611748	0.00647603
ENSG00000213516	RBMXL1	-0.0518739	0.794937	-0.64342	0.000803207	-0.460021	0.0224468
ENSG00000213593	TMX2	-0.0279487	0.915129	-0.498573	0.0164095	-0.388152	0.0719989
ENSG00000213923	CSNK1E	-0.0490805	0.801152	-0.495091	0.00527054	-0.3425	0.0714699
ENSG00000214078	CPNE1	0.142032	0.412804	-0.22867	0.329769	-0.546141	0.0102291
ENSG00000214253	FIS1	-0.00571978	0.9893	-0.452358	0.0117957	-0.427399	0.0212498
ENSG00000214300	SPDYE3	-0.0186484	0.955511	-0.68855	0.00828798	-0.559362	0.0283519
ENSG00000214796	TUBA5P	0.0483751	0.818446	-0.330649	0.163486	-0.495361	0.0306983
ENSG00000215014		-0.141964	0.450189	-0.742575	0.0049456	-0.299107	0.255968
ENSG00000215252	GOLGA8B	-0.213061	0.266303	-1.02137	0.00239043	-0.266282	0.314896
ENSG00000217128	FNIP1	0.013692	0.967669	-0.493483	0.00600034	-0.535389	0.00361821
ENSG00000221978	CCNL2	-0.195694	0.263891	-0.742765	9.3002e-05	-0.350998	0.0930535
ENSG00000221995	NA	0.185491	0.341208	-0.172197	0.566173	-0.590634	0.0223309
ENSG00000222724	RNU2-63P	0.0083787	0.983714	-0.730361	0.0177805	-0.636038	0.0147734
ENSG00000223496	EXOSC6	-0.0899636	0.579219	-0.480295	0.00473935	-0.259534	0.172937
ENSG00000223959	AFG3L1P	-0.62188	0.00150915	-0.657761	0.000230009	-0.0329505	0.90615
ENSG00000224060	ARSLP1	-0.0868144	0.620314	-0.95276	0.00623446	-0.341953	0.159752
ENSG00000224099		-0.0088636	0.982848	-2.76099	3.28148e-06	-1.80074	2.08837e-05
ENSG00000224877	NDUFAF8	-0.0301274	0.898761	-0.54563	0.0022321	-0.438111	0.0196688
ENSG00000224905		-0.584891	0.0360791	-0.37913	0.147675	0.213562	0.445694
ENSG00000225335		-0.0157302	0.964754	-0.599661	0.0276428	-0.482199	0.0633723
ENSG00000225614	ZNF469	0.011252	0.975519	-0.430153	0.0327716	-0.46505	0.0217606
ENSG00000225630	MTND2P28	0.0255783	0.927935	-0.573096	0.0260474	-0.680607	0.00903789
ENSG00000226419	SLC16A1-AS1	-0.00968417	0.981477	-0.526924	0.0365458	-0.464869	0.0632649
ENSG00000226648	PLCG1-AS1	-0.0138162	0.97157	-0.783469	0.0117223	-0.567609	0.0300562
ENSG00000226887	ERVMER34-1	-0.0608187	0.768898	-0.69044	0.00533889	-0.425188	0.0863993
ENSG00000228109	MELTF-AS1	-0.070625	0.71736	-0.790437	0.00980501	-0.365526	0.153254
ENSG00000228389	NA	-0.898556	0.0154237	-0.118473	NA	0.388598	NA
ENSG00000228624	HDAC2-AS2	0.0017153	0.999028	-0.539646	0.0305202	-0.529592	0.033114
ENSG00000228887	EEF1DP1	0.0813661	0.65987	-0.339853	0.148665	-0.588765	0.00981608
ENSG00000229444	ST3GAL3-AS1	0.00531918	0.99142	-1.63699	5.89824e-09	-1.54829	1.97511e-08
ENSG00000229715	EEF1DP3	0.0420712	0.853227	-0.567894	0.0239097	-0.747457	0.00379815
ENSG00000230513	THAP7-AS1	-0.180777	0.350309	-0.587307	0.024702	-0.150449	0.611346
ENSG00000230732		-0.63601	0.0327917	-0.34258	0.200535	0.255	0.344381
ENSG00000230783	RPS3AP13	0.0841219	0.622885	-0.216054	0.405179	-0.491164	0.0458479
ENSG00000231453	LINC01305	-0.105358	0.53496	-0.901137	2.64331e-06	-0.576177	0.00438283
ENSG00000232119	MCTS1	0.134666	0.408708	-0.368684	0.0534203	-0.66155	0.000295661
ENSG00000233927	RPS28	0.125043	0.500001	-0.221952	0.41304	-0.552476	0.0243758
ENSG00000234127	TRIM26	-0.0243507	0.929428	-0.804435	0.000322505	-0.667125	0.00352426
ENSG00000234222	LIX1L-AS1	0.097953	0.604778	-0.325644	0.214956	-0.638937	0.0134847
ENSG00000234771	SLC25A25-AS1	-0.0335349	0.897647	-0.562291	0.03701	-0.380542	0.144803
ENSG00000235919	ASH1L-AS1	-1.08153	2.67582e-05	-0.430396	0.0621348	0.442467	0.0579508
ENSG00000235961	PNMA6A	0.0070727	0.986887	-0.491778	0.0257829	-0.510897	0.0215895
ENSG00000236031		-0.132406	0.47392	-0.577264	0.0304452	-0.184787	0.519264
ENSG00000236081	ELFN1-AS1	-0.399444	0.0878048	-1.03206	6.44014e-05	-0.322065	0.200861
ENSG00000236404	VLDLR-AS1	0.275605	0.172351	-0.279478	0.241691	-0.749107	0.000938976
ENSG00000236540		-0.25968	0.20996	-0.671288	0.00640504	-0.175083	0.534721
ENSG00000236871	LINC00106	-0.0902417	0.614887	-1.0385	0.00347015	-0.386161	0.124696
ENSG00000238057	ZEB2-AS1	-0.0299726	0.905065	-0.550231	0.006715	-0.431395	0.0412654
ENSG00000238311	SNORD13E	-0.188192	0.335699	-1.66608	4.63426e-07	-0.73573	0.00542697
ENSG00000238754	SCARNA18B	-0.0351348	0.883382	-0.724228	0.0169692	-0.422414	0.0898642
ENSG00000239672	NME1	0.0263901	0.919284	-0.62792	0.00103613	-0.720845	0.000226342
ENSG00000239719		-0.00954544	0.981477	-1.03042	5.86216e-05	-0.910062	0.000306756
ENSG00000240065	PSMB9	0.0341426	0.883382	-0.877352	1.00537e-05	-1.01057	1.00041e-06
ENSG00000240230	COX19	-0.0870081	0.621607	-0.740918	0.000233161	-0.461379	0.0295706
ENSG00000241014	GPR199P	-1.55538	0.00150248	-0.250416	0.360284	0.549106	0.0344638
ENSG00000241399	CD302	0.0744059	0.684673	-0.32039	0.144776	-0.537583	0.0106516
ENSG00000241553	ARPC4	0.115946	0.526251	-0.267721	0.286993	-0.580053	0.0140164
ENSG00000241839	PLEKHO2	0.145543	0.408708	-0.23232	0.324821	-0.555083	0.00964523
ENSG00000241923	RPL14P3	0.0687794	0.736444	-0.300285	0.260775	-0.538978	0.035229
ENSG00000242294	STAG3L5P	-0.00202813	0.998151	-0.770144	0.014995	-0.582956	0.0211918
ENSG00000242372	EIF6	0.00733406	0.985015	-0.527776	0.00324422	-0.547416	0.00306207
ENSG00000242802	AP5Z1	0.0272581	0.916239	-0.451107	0.0287727	-0.544561	0.00857404
ENSG00000243335	KCTD7	0.398531	0.0907838	-0.0470998	0.894222	-0.575924	0.0190144
ENSG00000243449	C4orf48	0.27555	0.175338	-0.309251	0.194317	-0.793194	0.000542352
ENSG00000244187	TMEM141	0.0294583	0.908249	-0.460953	0.036689	-0.567179	0.0100785
ENSG00000248008	NRAV	0.0184838	0.953601	-0.60509	0.0341657	-0.628112	0.0168301
ENSG00000248049	UBA6-DT	0.15289	0.410846	-0.153885	0.597695	-0.506652	0.0375504
ENSG00000249249	TICAM2-AS1	-1.12827	0.0104998	-0.233481	0.317438	0.316171	0.11145
ENSG00000249859	PVT1	-0.0534431	0.790778	-0.477929	0.0239527	-0.296551	0.190313
ENSG00000250479	CHCHD10	0.0123352	0.974005	-0.687655	0.00271373	-0.728536	0.00184732
ENSG00000251136	RIPK2-DT	-0.0489127	0.820952	-0.599228	0.0321743	-0.335067	0.194674
ENSG00000252759	Y_RNA	-0.0782464	0.690515	-1.04046	0.000304935	-0.579699	0.0235498
ENSG00000253710	ALG11	0.0175865	0.956273	-0.564914	0.00831372	-0.626962	0.00425042
ENSG00000254093	PINX1	-0.0807172	0.65967	-0.731688	0.000820115	-0.446838	0.0474288
ENSG00000254470	AP5B1	-0.00311141	0.995239	-0.445644	0.0437997	-0.425075	0.0569332
ENSG00000254901	BORCS8	-0.0343004	0.882473	-0.520112	0.0108091	-0.389794	0.0675842
ENSG00000255198	SNHG9	-0.0749232	0.705673	-1.16703	7.30926e-05	-0.66441	0.0099497
ENSG00000255717	SNHG1	-0.0484523	0.811968	-0.544011	0.00571451	-0.376544	0.0697059
ENSG00000256269	HMBS	-0.026253	0.919284	-0.782504	3.55e-05	-0.664088	0.000802631
ENSG00000256667	KLRA1P	-0.133486	0.450626	-1.21025	0.00153782	-0.37034	0.141865
ENSG00000257159		0.03008	0.911861	-0.459304	0.0836981	-0.58253	0.027454
ENSG00000258297	NA	-0.735792	0.00743508	-0.437883	0.0719075	0.225789	0.398386
ENSG00000258441	LINC00641	-0.820386	0.00765558	-0.555303	0.0308907	0.159454	0.587996
ENSG00000259291	ZNF710-AS1	-0.194956	0.300006	-0.60534	0.0306792	-0.112303	0.708034
ENSG00000259439	LINC01833	-0.845186	0.0180789	-0.987036	0.00458274	-0.0167956	0.959259
ENSG00000259494	MRPL46	-0.0658213	0.713413	-0.488865	0.00721119	-0.298517	0.133284
ENSG00000259956	RBM15B	-0.11047	0.503343	-0.457765	0.0153707	-0.196015	0.372602
ENSG00000260317	LINC02986	-0.182552	0.342199	-0.579097	0.0326176	-0.124948	0.680276
ENSG00000260360		-0.178814	0.347894	-0.632835	0.0222693	-0.155322	0.596201
ENSG00000260853	NFATC2IP-AS1	0.0635206	0.71736	-0.261716	0.274759	-0.481825	0.0380995
ENSG00000261236	BOP1	0.0169755	0.958317	-0.682662	0.00101263	-0.74332	0.000496745
ENSG00000261373	VPS9D1-AS1	0.0701965	0.727765	-0.545626	0.0445762	-0.880464	0.00268721
ENSG00000261526		-0.0515234	0.811968	-0.534803	0.0299792	-0.32611	0.198215
ENSG00000261659		-0.0419808	0.851501	-0.779543	0.011464	-0.439077	0.0841581
ENSG00000262185	LINC02861	-0.145407	0.363372	-0.729914	0.0183087	-0.151821	0.524093
ENSG00000262265		-1.15229	0.0101667	-0.253159	0.30405	0.338506	0.113496
ENSG00000262370		-0.0384306	0.87247	-0.618414	0.0134388	-0.43129	0.0855967
ENSG00000262814	MRPL12	-0.0104176	0.979186	-0.60755	0.00777011	-0.545696	0.0187552
ENSG00000263105		-0.0125488	0.97157	-0.922921	0.00877924	-0.53761	0.0222217
ENSG00000265241	RBM8A	0.0297378	0.897647	-0.320883	0.0642726	-0.407753	0.0170571
ENSG00000265354	TIMM23	-0.0955742	0.586997	-0.496988	0.0180869	-0.232819	0.324026
ENSG00000265491	RNF115	-0.0146723	0.964545	-0.397368	0.0407605	-0.341868	0.0892039
ENSG00000266469		0.0726217	0.703335	-0.367718	0.108833	-0.595849	0.00787248
ENSG00000266714	MYO15B	-0.880096	0.00912007	-0.47442	0.0729395	0.224774	0.418384
ENSG00000267080	ASB16-AS1	-0.710841	0.00548875	-0.238516	0.341682	0.408017	0.0846207
ENSG00000269667		0.057702	0.778855	-0.459395	0.0868473	-0.720195	0.00992536
ENSG00000269688		-0.0288529	0.916239	-0.731899	0.0102503	-0.51314	0.0496533
ENSG00000270170	NCBP2AS2	-0.457421	0.0144033	-0.715234	1.79829e-05	-0.195981	0.342203
ENSG00000271926		-0.0935501	0.620344	-0.580257	0.0277664	-0.249797	0.360024
ENSG00000272008		-0.0483033	0.823727	-0.526351	0.0306792	-0.330607	0.188754
ENSG00000272145	NFYC-AS1	-0.0424595	0.838428	-0.569376	0.0044888	-0.413276	0.049035
ENSG00000272578		-0.085518	0.647418	-0.812733	0.00752275	-0.357322	0.167972
ENSG00000272674	PCDHB16	-0.269247	0.192169	-0.504546	0.0332937	-0.0551713	0.866652
ENSG00000272779	BMS1P20	0.0588689	0.778095	-0.645264	0.0111901	-0.909168	0.000706816
ENSG00000273314		-0.00230696	0.997311	-0.445719	0.0472619	-0.427758	0.0585735
ENSG00000273568		-0.00848897	0.984046	-0.868541	0.0030799	-0.729558	0.00769973
ENSG00000274627	NA	-0.313112	0.136283	-0.477266	0.0328725	-0.0224513	0.946641
ENSG00000275023	MLLT6	-0.289275	0.131524	-0.575733	0.00306841	-0.147899	0.544667
ENSG00000275342	PRAG1	0.157725	0.372003	-0.137509	0.603632	-0.464848	0.0318044
ENSG00000275632		-0.268112	0.204986	-0.541431	0.0389587	-0.0511902	0.882436
ENSG00000275700	AATF	0.0311401	0.905065	-0.395651	0.0949996	-0.509822	0.0292366
ENSG00000275713	H2BC9	-0.00856263	0.983714	-0.571407	0.014648	-0.51806	0.0287378
ENSG00000275964		-0.135885	0.437074	-0.673684	0.00132564	-0.328475	0.147016
ENSG00000276234	TADA2A	0.0109085	0.975652	-0.404332	0.0276218	-0.436736	0.0186257
ENSG00000276571		-0.880618	0.0151329	-0.440219	0.0999143	0.219753	0.409484
ENSG00000276672		-0.164938	0.38612	-0.71176	0.00529567	-0.266562	0.3141
ENSG00000277283		-0.752497	0.0255561	-0.27329	0.300722	0.311418	0.205654
ENSG00000277972	CISD3	-0.0535171	0.775262	-0.47872	0.00636115	-0.318674	0.0933829
ENSG00000278970	HEIH	0.0248123	0.925209	-0.426865	0.0392749	-0.511088	0.0135251
ENSG00000279078	SND1-IT1	-0.133941	0.453169	-0.634144	0.0263058	-0.181939	0.511026
ENSG00000279314		-0.0229351	0.939073	-0.68576	0.0126888	-0.518566	0.0465663
ENSG00000279516	FAM230C	-0.00490756	0.993596	-1.14614	0.000540611	-0.943744	0.00147057
ENSG00000279738		-0.654747	0.0151246	-1.19398	1.31173e-05	-0.272205	0.29868
ENSG00000279789		-0.254476	0.221671	-0.615269	0.0166513	-0.121332	0.689975
ENSG00000280067		0.0326916	0.878289	-0.333015	0.15391	-0.432111	0.0459085
ENSG00000280123	NA	-0.154043	0.410435	-0.864716	0.000804339	-0.383124	0.126925
ENSG00000280417		-0.0876537	0.646406	-0.654258	0.0115749	-0.322337	0.215115
ENSG00000281344	HELLPAR	-0.0549565	0.799421	-0.537782	0.0435604	-0.297032	0.264771

## Sheet: DAVID, top 10, down
Annotation Cluster 1	Enrichment Score: 5.872328966333034
"cell cycle"
Category	Term	Count	%	PValue	Genes	List Total	Pop Hits	Pop Total	Fold Enrichment	Bonferroni	Benjamini	FDR
GOTERM_BP_DIRECT	GO:0051301~cell division	48	3.94412	5.09e-07	ENSG00000132612, ENSG00000163539, ENSG00000112029, ENSG00000110200, ENSG00000075131, ENSG00000170631, ENSG00000178999, ENSG00000086827, ENSG00000117399, ENSG00000169689, ENSG00000134690, ENSG00000168476, ENSG00000184661, ENSG00000119969, ENSG00000154839, ENSG00000159055, ENSG00000105173, ENSG00000087586, ENSG00000164611, ENSG00000094804, ENSG00000164754, ENSG00000165689, ENSG00000105146, ENSG0000…	1095	382	19256	2.20968	0.00200765	0.000502	0.0005
UP_KW_BIOLOGICAL_PROCESS	KW-0131~Cell cycle	79	6.49137	5.79e-07	ENSG00000213465, ENSG00000132612, ENSG00000112245, ENSG00000075131, ENSG00000007968, ENSG00000106608, ENSG00000159259, ENSG00000086827, ENSG00000137100, ENSG00000184661, ENSG00000119969, ENSG00000159055, ENSG00000154839, ENSG00000164611, ENSG00000012048, ENSG00000094804, ENSG00000105146, ENSG00000126581, ENSG00000080839, ENSG00000112118, ENSG00000153140, ENSG00000112312, ENSG00000196510, ENSG0000…	734	679	11187	1.77327	7.53e-05	3.79e-05	3.44e-05
UP_KW_BIOLOGICAL_PROCESS	KW-0498~Mitosis	42	3.45111	1.59e-06	ENSG00000163539, ENSG00000112029, ENSG00000110200, ENSG00000075131, ENSG00000178999, ENSG00000086827, ENSG00000117399, ENSG00000169689, ENSG00000166851, ENSG00000134690, ENSG00000137100, ENSG00000168476, ENSG00000184661, ENSG00000119969, ENSG00000154839, ENSG00000159055, ENSG00000087586, ENSG00000164611, ENSG00000094804, ENSG00000164754, ENSG00000105146, ENSG00000135913, ENSG00000105325, ENSG0000…	734	286	11187	2.23821	0.000207	6.96e-05	6.32e-05
UP_KW_BIOLOGICAL_PROCESS	KW-0132~Cell division	52	4.2728	6.9e-06	ENSG00000132612, ENSG00000075131, ENSG00000086827, ENSG00000137100, ENSG00000184661, ENSG00000119969, ENSG00000159055, ENSG00000154839, ENSG00000164611, ENSG00000094804, ENSG00000105146, ENSG00000126581, ENSG00000153140, ENSG00000196510, ENSG00000116670, ENSG00000088325, ENSG00000145241, ENSG00000160783, ENSG00000101146, ENSG00000142856, ENSG00000100297, ENSG00000089053, ENSG00000163539, ENSG0000…	734	411	11187	1.92832	0.000896	0.000181	0.000164
Annotation Cluster 2	Enrichment Score: 4.151417230180343
"respiration"
Category	Term	Count	%	PValue	Genes	List Total	Pop Hits	Pop Total	Fold Enrichment	Bonferroni	Benjamini	FDR
GOTERM_BP_DIRECT	GO:0009060~aerobic respiration	18	1.47905	2.66e-07	ENSG00000198840, ENSG00000174886, ENSG00000198786, ENSG00000158864, ENSG00000151376, ENSG00000198804, ENSG00000010256, ENSG00000146701, ENSG00000212907, ENSG00000166136, ENSG00000125779, ENSG00000167792, ENSG00000139180, ENSG00000145494, ENSG00000146410, ENSG00000147684, ENSG00000184983, ENSG00000110717	1095	70	19256	4.52196	0.00104988	0.00035	0.000348
GOTERM_BP_DIRECT	GO:0032981~mitochondrial respiratory chain complex I assembly	14	1.15037	4.39e-05	ENSG00000178057, ENSG00000174886, ENSG00000198786, ENSG00000074582, ENSG00000110074, ENSG00000158864, ENSG00000177646, ENSG00000166136, ENSG00000156709, ENSG00000224877, ENSG00000139180, ENSG00000147684, ENSG00000184983, ENSG00000110717	1095	63	19256	3.90786	0.159168	0.0216644	0.0215601
UP_KW_BIOLOGICAL_PROCESS	KW-0679~Respiratory chain	15	1.23254	6.32e-05	ENSG00000198840, ENSG00000174886, ENSG00000198786, ENSG00000110074, ENSG00000158864, ENSG00000198804, ENSG00000010256, ENSG00000212907, ENSG00000166136, ENSG00000167792, ENSG00000139180, ENSG00000145494, ENSG00000147684, ENSG00000184983, ENSG00000110717	734	65	11187	3.51719	0.00818041	0.00116419	0.00105755
GOTERM_BP_DIRECT	GO:0006120~mitochondrial electron transport, NADH to ubiquinone	11	0.903862	0.000254	ENSG00000212907, ENSG00000166136, ENSG00000198840, ENSG00000167792, ENSG00000139180, ENSG00000145494, ENSG00000198786, ENSG00000147684, ENSG00000184983, ENSG00000110717, ENSG00000158864	1095	47	19256	4.11573	0.632333	0.0793295	0.0789474
GOTERM_BP_DIRECT	GO:0042776~mitochondrial ATP synthesis coupled proton transport	13	1.0682	0.000261	ENSG00000198840, ENSG00000174886, ENSG00000198786, ENSG00000158864, ENSG00000212907, ENSG00000166136, ENSG00000165283, ENSG00000167792, ENSG00000139180, ENSG00000145494, ENSG00000147684, ENSG00000184983, ENSG00000110717	1095	65	19256	3.51708	0.643592	0.0793295	0.0789474
UP_KW_BIOLOGICAL_PROCESS	KW-0249~Electron transport	17	1.39688	0.00251817	ENSG00000023572, ENSG00000198840, ENSG00000174886, ENSG00000198786, ENSG00000110074, ENSG00000158864, ENSG00000198804, ENSG00000010256, ENSG00000212907, ENSG00000166136, ENSG00000008283, ENSG00000167792, ENSG00000139180, ENSG00000145494, ENSG00000147684, ENSG00000184983, ENSG00000110717	734	112	11187	2.31339	0.279474	0.0242601	0.0220378
Annotation Cluster 3	Enrichment Score: 3.489231633465912
"mRNA splicing"
Category	Term	Count	%	PValue	Genes	List Total	Pop Hits	Pop Total	Fold Enrichment	Bonferroni	Benjamini	FDR
GOTERM_BP_DIRECT	GO:0000398~mRNA splicing, via spliceosome	28	2.30074	3.1e-05	ENSG00000110107, ENSG00000124193, ENSG00000077312, ENSG00000189091, ENSG00000171960, ENSG00000137168, ENSG00000265241, ENSG00000111196, ENSG00000004534, ENSG00000130332, ENSG00000167088, ENSG00000087365, ENSG00000161547, ENSG00000101161, ENSG00000134748, ENSG00000121390, ENSG00000173933, ENSG00000122965, ENSG00000142252, ENSG00000125835, ENSG00000100138, ENSG00000168066, ENSG00000259956, ENSG0000…	1095	202	19256	2.43758	0.115185	0.0174777	0.0173935
UP_KW_BIOLOGICAL_PROCESS	KW-0507~mRNA processing	46	3.77979	7.11e-05	ENSG00000071894, ENSG00000160208, ENSG00000110107, ENSG00000124193, ENSG00000179409, ENSG00000077312, ENSG00000189091, ENSG00000171960, ENSG00000131043, ENSG00000137168, ENSG00000265241, ENSG00000111196, ENSG00000130332, ENSG00000154743, ENSG00000119203, ENSG00000117751, ENSG00000160075, ENSG00000079785, ENSG00000101811, ENSG00000166133, ENSG00000167088, ENSG00000181817, ENSG00000087365, ENSG0000…	734	379	11187	1.84985	0.00920019	0.00116419	0.00105755
UP_KW_BIOLOGICAL_PROCESS	KW-0508~mRNA splicing	37	3.04026	0.000218	ENSG00000160208, ENSG00000110107, ENSG00000124193, ENSG00000179409, ENSG00000077312, ENSG00000189091, ENSG00000171960, ENSG00000131043, ENSG00000137168, ENSG00000265241, ENSG00000111196, ENSG00000130332, ENSG00000117751, ENSG00000167088, ENSG00000181817, ENSG00000087365, ENSG00000161547, ENSG00000128563, ENSG00000179950, ENSG00000101161, ENSG00000134748, ENSG00000105705, ENSG00000213516, ENSG0000…	734	295	11187	1.9116	0.0279732	0.00317633	0.00288537
GOTERM_BP_DIRECT	GO:0008380~RNA splicing	24	1.97206	0.0010289	ENSG00000128563, ENSG00000160208, ENSG00000179950, ENSG00000089280, ENSG00000101161, ENSG00000105705, ENSG00000189091, ENSG00000137168, ENSG00000213516, ENSG00000265241, ENSG00000111196, ENSG00000173933, ENSG00000117751, ENSG00000011304, ENSG00000125835, ENSG00000088247, ENSG00000167088, ENSG00000177192, ENSG00000181817, ENSG00000259956, ENSG00000126457, ENSG00000087365, ENSG00000182872, ENSG0000…	1095	200	19256	2.11025	0.98277	0.161957	0.161177
GOTERM_BP_DIRECT	GO:0006397~mRNA processing	23	1.88989	0.00722905	ENSG00000128563, ENSG00000160208, ENSG00000179950, ENSG00000099899, ENSG00000105705, ENSG00000213516, ENSG00000265241, ENSG00000173933, ENSG00000154743, ENSG00000119203, ENSG00000175756, ENSG00000117751, ENSG00000011304, ENSG00000079785, ENSG00000166133, ENSG00000088247, ENSG00000167088, ENSG00000177192, ENSG00000181817, ENSG00000259956, ENSG00000087365, ENSG00000161547, ENSG00000087087	1095	220	19256	1.83847	1	0.593987	0.591126
Annotation Cluster 4	Enrichment Score: 2.835361998908438
"DNA repair"
Category	Term	Count	%	PValue	Genes	List Total	Pop Hits	Pop Total	Fold Enrichment	Bonferroni	Benjamini	FDR
GOTERM_BP_DIRECT	GO:0006281~DNA repair	32	2.62942	0.000692	ENSG00000136518, ENSG00000183207, ENSG00000076248, ENSG00000197299, ENSG00000110107, ENSG00000134574, ENSG00000170430, ENSG00000213923, ENSG00000159259, ENSG00000133863, ENSG00000110066, ENSG00000116288, ENSG00000163781, ENSG00000169689, ENSG00000187531, ENSG00000169189, ENSG00000187778, ENSG00000177084, ENSG00000160953, ENSG00000107672, ENSG00000164611, ENSG00000012048, ENSG00000160957, ENSG0000…	1095	294	19256	1.91406	0.934762	0.127099	0.126486
UP_KW_BIOLOGICAL_PROCESS	KW-0227~DNA damage	44	3.61545	0.00173878	ENSG00000136518, ENSG00000183207, ENSG00000242802, ENSG00000181026, ENSG00000076248, ENSG00000197299, ENSG00000146263, ENSG00000065057, ENSG00000110107, ENSG00000148362, ENSG00000134574, ENSG00000075131, ENSG00000170430, ENSG00000159259, ENSG00000133863, ENSG00000073050, ENSG00000166454, ENSG00000160193, ENSG00000116288, ENSG00000163781, ENSG00000169689, ENSG00000187531, ENSG00000169189, ENSG0000…	734	414	11187	1.61983	0.202472	0.022778	0.0206915
UP_KW_BIOLOGICAL_PROCESS	KW-0234~DNA repair	38	3.12243	0.00259268	ENSG00000136518, ENSG00000183207, ENSG00000242802, ENSG00000076248, ENSG00000197299, ENSG00000146263, ENSG00000065057, ENSG00000110107, ENSG00000148362, ENSG00000134574, ENSG00000170430, ENSG00000159259, ENSG00000133863, ENSG00000073050, ENSG00000116288, ENSG00000163781, ENSG00000169689, ENSG00000187531, ENSG00000169189, ENSG00000187778, ENSG00000177084, ENSG00000163945, ENSG00000160953, ENSG0000…	734	350	11187	1.65475	0.286438	0.0242601	0.0220378
Annotation Cluster 5	Enrichment Score: 2.5087182884625103
"chromatin remodeling"
Category	Term	Count	%	PValue	Genes	List Total	Pop Hits	Pop Total	Fold Enrichment	Bonferroni	Benjamini	FDR
GOTERM_BP_DIRECT	GO:2000045~regulation of G1/S transition of mitotic cell cycle	15	1.23254	1e-06	ENSG00000131467, ENSG00000136518, ENSG00000092010, ENSG00000099956, ENSG00000115738, ENSG00000108604, ENSG00000111679, ENSG00000205683, ENSG00000066117, ENSG00000189079, ENSG00000127616, ENSG00000100911, ENSG00000101412, ENSG00000011332, ENSG00000124762	1095	53	19256	4.977	0.00395134	0.000792	0.000788
GOTERM_BP_DIRECT	GO:0030071~regulation of mitotic metaphase/anaphase transition	10	0.821693	0.00011	ENSG00000189079, ENSG00000136518, ENSG00000099956, ENSG00000166851, ENSG00000127616, ENSG00000108604, ENSG00000205683, ENSG00000066117, ENSG00000011332, ENSG00000094804	1095	35	19256	5.0244	0.352117	0.0465522	0.0463279
GOTERM_BP_DIRECT	GO:0045597~positive regulation of cell differentiation	13	1.0682	0.000118	ENSG00000136518, ENSG00000099956, ENSG00000108604, ENSG00000205683, ENSG00000066117, ENSG00000117676, ENSG00000096384, ENSG00000189079, ENSG00000170515, ENSG00000127616, ENSG00000096968, ENSG00000011332, ENSG00000144355	1095	60	19256	3.81017	0.372284	0.0465522	0.0463279
GOTERM_BP_DIRECT	GO:0070316~regulation of G0 to G1 transition	8	0.657354	0.000365	ENSG00000189079, ENSG00000136518, ENSG00000099956, ENSG00000127616, ENSG00000108604, ENSG00000205683, ENSG00000066117, ENSG00000011332	1095	25	19256	5.62732	0.76277	0.0898812	0.0894482
GOTERM_BP_DIRECT	GO:2000781~positive regulation of double-strand break repair	10	0.821693	0.000401	ENSG00000189079, ENSG00000136518, ENSG00000099956, ENSG00000127616, ENSG00000078487, ENSG00000108604, ENSG00000205683, ENSG00000066117, ENSG00000170430, ENSG00000011332	1095	41	19256	4.28912	0.794868	0.0931401	0.0926914
GOTERM_BP_DIRECT	GO:2000819~regulation of nucleotide-excision repair	8	0.657354	0.000773	ENSG00000189079, ENSG00000136518, ENSG00000099956, ENSG00000127616, ENSG00000108604, ENSG00000205683, ENSG00000066117, ENSG00000011332	1095	28	19256	5.0244	0.952751	0.127099	0.126486
GOTERM_BP_DIRECT	GO:0006338~chromatin remodeling	20	1.64339	0.00450849	ENSG00000183207, ENSG00000095564, ENSG00000136518, ENSG00000099956, ENSG00000149480, ENSG00000108604, ENSG00000165609, ENSG00000205683, ENSG00000066117, ENSG00000167491, ENSG00000189079, ENSG00000127616, ENSG00000028310, ENSG00000187778, ENSG00000008083, ENSG00000165732, ENSG00000011332, ENSG00000106462, ENSG00000276234, ENSG00000108773	1095	173	19256	2.03299	1	0.455935	0.453739
GOTERM_BP_DIRECT	GO:0006337~nucleosome disassembly	5	0.410846	0.0202469	ENSG00000189079, ENSG00000099956, ENSG00000127616, ENSG00000108604, ENSG00000066117	1095	19	19256	4.62773	1	0.998173	0.993364
GOTERM_BP_DIRECT	GO:0045663~positive regulation of myoblast differentiation	7	0.575185	0.0488389	ENSG00000189079, ENSG00000136518, ENSG00000099956, ENSG00000127616, ENSG00000108604, ENSG00000205683, ENSG00000066117	1095	47	19256	2.6191	1	1	0.995435
GOTERM_BP_DIRECT	GO:0045582~positive regulation of T cell differentiation	6	0.493016	0.0512676	ENSG00000189079, ENSG00000136518, ENSG00000099956, ENSG00000127616, ENSG00000108604, ENSG00000066117	1095	36	19256	2.9309	1	1	0.995435
GOTERM_BP_DIRECT	GO:1902459~positive regulation of stem cell population maintenance	6	0.493016	0.110352	ENSG00000136518, ENSG00000099956, ENSG00000089094, ENSG00000127616, ENSG00000028310, ENSG00000066117	1095	45	19256	2.34472	1	1	0.995435
GOTERM_BP_DIRECT	GO:0043044~ATP-dependent chromatin remodeling	5	0.410846	0.135193	ENSG00000136518, ENSG00000099956, ENSG00000149480, ENSG00000127616, ENSG00000108604	1095	35	19256	2.5122	1	1	0.995435
GOTERM_BP_DIRECT	GO:0045596~negative regulation of cell differentiation	5	0.410846	0.484162	ENSG00000136518, ENSG00000127616, ENSG00000028310, ENSG00000184058, ENSG00000066117	1095	63	19256	1.39567	1	1	0.995435
Annotation Cluster 6	Enrichment Score: 2.061342017536631
"DNA replication initiation"
Category	Term	Count	%	PValue	Genes	List Total	Pop Hits	Pop Total	Fold Enrichment	Bonferroni	Benjamini	FDR
GOTERM_BP_DIRECT	GO:0030174~regulation of DNA-dependent DNA replication initiation	6	0.493016	0.000763	ENSG00000112118, ENSG00000065268, ENSG00000112312, ENSG00000166508, ENSG00000100297, ENSG00000167513	1095	14	19256	7.53659	0.950695	0.127099	0.126486
GOTERM_BP_DIRECT	GO:0006268~DNA unwinding involved in DNA replication	7	0.575185	0.00145131	ENSG00000160957, ENSG00000112118, ENSG00000197299, ENSG00000107815, ENSG00000166508, ENSG00000101003, ENSG00000100297	1095	23	19256	5.35207	0.996751	0.190798	0.189879
GOTERM_BP_DIRECT	GO:0006270~DNA replication initiation	7	0.575185	0.00424826	ENSG00000163781, ENSG00000112118, ENSG00000085840, ENSG00000166508, ENSG00000105173, ENSG00000100297, ENSG00000094804	1095	28	19256	4.39635	1	0.440925	0.438801
GOTERM_BP_DIRECT	GO:0006267~pre-replicative complex assembly involved in nuclear cell cycle DNA replication	3	0.246508	0.0718638	ENSG00000112118, ENSG00000166508, ENSG00000100297	1095	8	19256	6.59452	1	1	0.995435
GOTERM_BP_DIRECT	GO:0000727~double-strand break repair via break-induced replication	3	0.246508	0.146047	ENSG00000112118, ENSG00000166508, ENSG00000100297	1095	12	19256	4.39635	1	1	0.995435
Annotation Cluster 7	Enrichment Score: 2.045989531200683
"RNA catabolic process"
Category	Term	Count	%	PValue	Genes	List Total	Pop Hits	Pop Total	Fold Enrichment	Bonferroni	Benjamini	FDR
GOTERM_BP_DIRECT	GO:0006401~RNA catabolic process	9	0.739523	0.000629	ENSG00000123737, ENSG00000117751, ENSG00000223496, ENSG00000178896, ENSG00000197157, ENSG00000104889, ENSG00000149577, ENSG00000171865, ENSG00000075914	1095	35	19256	4.52196	0.916523	0.127099	0.126486
GOTERM_BP_DIRECT	GO:0034475~U4 snRNA 3'-end processing	4	0.328677	0.00825429	ENSG00000123737, ENSG00000223496, ENSG00000178896, ENSG00000075914	1095	8	19256	8.79269	1	0.633186	0.630136
GOTERM_BP_DIRECT	GO:0071028~nuclear mRNA surveillance	4	0.328677	0.0118631	ENSG00000123737, ENSG00000223496, ENSG00000178896, ENSG00000075914	1095	9	19256	7.81573	1	0.763478	0.7598
GOTERM_BP_DIRECT	GO:0034427~nuclear-transcribed mRNA catabolic process, exonucleolytic, 3'-5'	4	0.328677	0.0162399	ENSG00000123737, ENSG00000223496, ENSG00000178896, ENSG00000075914	1095	10	19256	7.03416	1	0.915873	0.91146
GOTERM_BP_DIRECT	GO:0016075~rRNA catabolic process	4	0.328677	0.0588529	ENSG00000123737, ENSG00000223496, ENSG00000178896, ENSG00000075914	1095	16	19256	4.39635	1	1	0.995435
Annotation Cluster 8	Enrichment Score: 1.579292057933723
"cell cycle"
Category	Term	Count	%	PValue	Genes	List Total	Pop Hits	Pop Total	Fold Enrichment	Bonferroni	Benjamini	FDR
GOTERM_BP_DIRECT	GO:0007346~regulation of mitotic cell cycle	12	0.986031	0.000765	ENSG00000117399, ENSG00000275700, ENSG00000166851, ENSG00000105325, ENSG00000112029, ENSG00000198355, ENSG00000112312, ENSG00000110200, ENSG00000196510, ENSG00000185324, ENSG00000089053, ENSG00000124762	1095	63	19256	3.3496	0.951162	0.127099	0.126486
GOTERM_BP_DIRECT	GO:0051445~regulation of meiotic cell cycle	5	0.410846	0.024198	ENSG00000117399, ENSG00000105325, ENSG00000110200, ENSG00000196510, ENSG00000089053	1095	20	19256	4.39635	1	1	0.995435
GOTERM_BP_DIRECT	GO:0031145~anaphase-promoting complex-dependent catabolic process	5	0.410846	0.0505635	ENSG00000117399, ENSG00000105325, ENSG00000110200, ENSG00000196510, ENSG00000089053	1095	25	19256	3.51708	1	1	0.995435
GOTERM_BP_DIRECT	GO:0070979~protein K11-linked ubiquitination	3	0.246508	0.514671	ENSG00000105325, ENSG00000196510, ENSG00000089053	1095	30	19256	1.75854	1	1	0.995435
Annotation Cluster 9	Enrichment Score: 1.5397584529758033
"aromatic amino acid catabolism"
Category	Term	Count	%	PValue	Genes	List Total	Pop Hits	Pop Total	Fold Enrichment	Bonferroni	Benjamini	FDR
GOTERM_BP_DIRECT	GO:0006559~L-phenylalanine catabolic process	4	0.328677	0.00825429	ENSG00000113924, ENSG00000103876, ENSG00000100577, ENSG00000151552	1095	8	19256	8.79269	1	0.633186	0.630136
UP_KW_BIOLOGICAL_PROCESS	KW-0828~Tyrosine catabolism	3	0.246508	0.0375423	ENSG00000113924, ENSG00000103876, ENSG00000100577	734	5	11187	9.14469	0.993088	0.245902	0.223377
GOTERM_BP_DIRECT	GO:0006572~tyrosine catabolic process	3	0.246508	0.041511	ENSG00000113924, ENSG00000103876, ENSG00000100577	1095	6	19256	8.79269	1	1	0.995435
UP_KW_BIOLOGICAL_PROCESS	KW-0585~Phenylalanine catabolism	3	0.246508	0.0539017	ENSG00000113924, ENSG00000103876, ENSG00000100577	734	6	11187	7.62057	0.999256	0.308553	0.280289
Annotation Cluster 10	Enrichment Score: 1.4992620776665524
"transcription"
Category	Term	Count	%	PValue	Genes	List Total	Pop Hits	Pop Total	Fold Enrichment	Bonferroni	Benjamini	FDR
UP_KW_BIOLOGICAL_PROCESS	KW-0804~Transcription	185	15.2013	0.0166391	ENSG00000180530, ENSG00000123064, ENSG00000198466, ENSG00000197933, ENSG00000159259, ENSG00000179943, ENSG00000189079, ENSG00000168137, ENSG00000079785, ENSG00000087842, ENSG00000164338, ENSG00000057757, ENSG00000221978, ENSG00000214078, ENSG00000099817, ENSG00000140365, ENSG00000012048, ENSG00000074657, ENSG00000131653, ENSG00000179950, ENSG00000182944, ENSG00000107249, ENSG00000130844, ENSG0000…	734	2444	11187	1.15369	0.887103	0.136233	0.123753
UP_KW_BIOLOGICAL_PROCESS	KW-0805~Transcription regulation	177	14.544	0.0330006	ENSG00000180530, ENSG00000123064, ENSG00000198466, ENSG00000197933, ENSG00000159259, ENSG00000179943, ENSG00000189079, ENSG00000168137, ENSG00000079785, ENSG00000087842, ENSG00000164338, ENSG00000057757, ENSG00000221978, ENSG00000214078, ENSG00000140365, ENSG00000012048, ENSG00000074657, ENSG00000131653, ENSG00000179950, ENSG00000182944, ENSG00000107249, ENSG00000130844, ENSG00000181472, ENSG0000…	734	2374	11187	1.13634	0.987253	0.229578	0.208548
GOTERM_BP_DIRECT	GO:0006357~regulation of transcription from RNA polymerase II promoter	114	9.3673	0.0578845	ENSG00000180530, ENSG00000173320, ENSG00000198466, ENSG00000067955, ENSG00000197933, ENSG00000189079, ENSG00000221978, ENSG00000012048, ENSG00000107249, ENSG00000130844, ENSG00000181472, ENSG00000066117, ENSG00000170100, ENSG00000163132, ENSG00000008441, ENSG00000116990, ENSG00000148516, ENSG00000184058, ENSG00000204946, ENSG00000166888, ENSG00000136518, ENSG00000089280, ENSG00000128573, ENSG0000…	1095	1721	19256	1.16487	1	1	0.995435

## Sheet: DAVID, top 2, genes, down
Annotation cluster 1 "cell cycle"			Annotation cluster 2 "respiration"
ensembl_gene_ID	external_gene_name		ensembl_gene_ID	external_gene_name
ENSG00000213465	ADP ribosylation factor like GTPase 2(ARL2)		ENSG00000074582	BCS1 homolog, ubiquinol-cytochrome c reductase complex chaperone(BCS1L)
ENSG00000012048	BRCA1 DNA repair associated(BRCA1)		ENSG00000110074	FAD dependent oxidoreductase domain containing 1(FOXRED1)
ENSG00000105486	DNA ligase 1(LIG1)		ENSG00000178057	NADH:ubiquinone oxidoreductase complex assembly factor 3(NDUFAF3)
ENSG00000101412	E2F transcription factor 1(E2F1)		ENSG00000224877	NADH:ubiquinone oxidoreductase complex assembly factor 8(NDUFAF8)
ENSG00000007968	E2F transcription factor 2(E2F2)		ENSG00000158864	NADH:ubiquinone oxidoreductase core subunit S2(NDUFS2)
ENSG00000169016	E2F transcription factor 6(E2F6)		ENSG00000110717	NADH:ubiquinone oxidoreductase core subunit S8(NDUFS8)
ENSG00000112029	F-box protein 5(FBXO5)		ENSG00000167792	NADH:ubiquinone oxidoreductase core subunit V1(NDUFV1)
ENSG00000179271	GADD45G interacting protein 1(GADD45GIP1)		ENSG00000174886	NADH:ubiquinone oxidoreductase subunit A11(NDUFA11)
ENSG00000137814	HAUS augmin like complex subunit 2(HAUS2)		ENSG00000184983	NADH:ubiquinone oxidoreductase subunit A6(NDUFA6)
ENSG00000131351	HAUS augmin like complex subunit 8(HAUS8)		ENSG00000139180	NADH:ubiquinone oxidoreductase subunit A9(NDUFA9)
ENSG00000232119	MCTS1 re-initiation and release factor(MCTS1)		ENSG00000166136	NADH:ubiquinone oxidoreductase subunit B8(NDUFB8)
ENSG00000159055	MIS18 kinetochore protein A(MIS18A)		ENSG00000147684	NADH:ubiquinone oxidoreductase subunit B9(NDUFB9)
ENSG00000164611	PTTG1 regulator of sister chromatid separation, securin(PTTG1)		ENSG00000145494	NADH:ubiquinone oxidoreductase subunit S6(NDUFS6)
ENSG00000198355	Pim-3 proto-oncogene, serine/threonine kinase(PIM3)		ENSG00000177646	acyl-CoA dehydrogenase family member 9(ACAD9)
ENSG00000164754	RAD21 cohesin complex component(RAD21)		ENSG00000156709	apoptosis inducing factor mitochondria associated 1(AIFM1)
ENSG00000080839	RB transcriptional corepressor like 1(RBL1)		ENSG00000008283	cytochrome b561(CYB561)
ENSG00000068028	Ras association domain family member 1(RASSF1)		ENSG00000023572	glutaredoxin 2(GLRX2)
ENSG00000099956	SWI/SNF related, matrix associated, actin dependent regulator of chromatin, subfamily b, member 1(SMARCB1)		ENSG00000146701	malate dehydrogenase 2(MDH2)
ENSG00000075131	TIMELESS interacting protein(TIPIN)		ENSG00000151376	malic enzyme 3(ME3)
ENSG00000088325	TPX2 microtubule nucleation factor(TPX2)		ENSG00000146410	mitochondrial fission regulator 2(MTFR2)
ENSG00000110200	anaphase promoting complex subunit 15(ANAPC15)		ENSG00000212907	mitochondrially encoded NADH 4L dehydrogenase(MT-ND4L)
ENSG00000089053	anaphase promoting complex subunit 5(ANAPC5)		ENSG00000198840	mitochondrially encoded NADH dehydrogenase 3(MT-ND3)
ENSG00000196510	anaphase promoting complex subunit 7(ANAPC7)		ENSG00000198786	mitochondrially encoded NADH dehydrogenase 5(MT-ND5)
ENSG00000122359	annexin A11(ANXA11)		ENSG00000198804	mitochondrially encoded cytochrome c oxidase I(MT-CO1)
ENSG00000087586	aurora kinase A(AURKA)		ENSG00000125779	pantothenate kinase 2(PANK2)
ENSG00000178999	aurora kinase B(AURKB)		ENSG00000165283	stomatin like 2(STOML2)
ENSG00000105146	aurora kinase C(AURKC)		ENSG00000010256	ubiquinol-cytochrome c reductase core protein 1(UQCRC1)
ENSG00000126581	beclin 1(BECN1)
ENSG00000117399	cell division cycle 20(CDC20)
ENSG00000164045	cell division cycle 25A(CDC25A)
ENSG00000105401	cell division cycle 37, HSP90 cochaperone(CDC37)
ENSG00000094804	cell division cycle 6(CDC6)
ENSG00000184661	cell division cycle associated 2(CDCA2)
ENSG00000134690	cell division cycle associated 8(CDCA8)
ENSG00000153140	centrin 3(CETN3)
ENSG00000145241	centromere protein C(CENPC)
ENSG00000169689	centromere protein X(CENPX)
ENSG00000167670	chromatin assembly factor 1 subunit A(CHAF1A)
ENSG00000159259	chromatin assembly factor 1 subunit B(CHAF1B)
ENSG00000167513	chromatin licensing and DNA replication factor 1(CDT1)
ENSG00000122966	citron rho-interacting serine/threonine kinase(CIT)
ENSG00000105173	cyclin E1(CCNE1)
ENSG00000162063	cyclin F(CCNF)
ENSG00000178950	cyclin G associated kinase(GAK)
ENSG00000090061	cyclin K(CCNK)
ENSG00000185324	cyclin dependent kinase 10(CDK10)
ENSG00000124762	cyclin dependent kinase inhibitor 1A(CDKN1A)
ENSG00000163539	cytoplasmic linker associated protein 2(CLASP2)
ENSG00000204843	dynactin subunit 1(DCTN1)
ENSG00000137100	dynactin subunit 3(DCTN3)
ENSG00000165689	endosome associated trafficking regulator 1(ENTR1)
ENSG00000105325	fizzy and cell division cycle 20 related 1(FZR1)
ENSG00000112312	geminin DNA replication inhibitor(GMNN)
ENSG00000119969	helicase, lymphoid specific(HELLS)
ENSG00000142856	integrin subunit beta 3 binding protein(ITGB3BP)
ENSG00000112118	minichromosome maintenance complex component 3(MCM3)
ENSG00000100297	minichromosome maintenance complex component 5(MCM5)
ENSG00000166508	minichromosome maintenance complex component 7(MCM7)
ENSG00000182154	mitochondrial ribosomal protein L41(MRPL41)
ENSG00000188130	mitogen-activated protein kinase 12(MAPK12)
ENSG00000091436	mitogen-activated protein kinase kinase kinase 20(MAP3K20)
ENSG00000116670	mitotic arrest deficient 2 like 2(MAD2L2)
ENSG00000121152	non-SMC condensin I complex subunit H(NCAPH)
ENSG00000166851	polo like kinase 1(PLK1)
ENSG00000160783	polyamine modulated factor 1(PMF1)
ENSG00000143294	proline rich mitotic checkpoint control factor(PRCC)
ENSG00000131467	proteasome activator subunit 3(PSME3)
ENSG00000112245	protein tyrosine phosphatase 4A1(PTP4A1)
ENSG00000168476	receptor accessory protein 4(REEP4)
ENSG00000101146	ribonucleic acid export 1(RAE1)
ENSG00000117676	ribosomal protein S6 kinase A1(RPS6KA1)
ENSG00000154839	spindle and kinetochore associated complex subunit 1(SKA1)
ENSG00000121274	terminal nucleotidyltransferase 4B(TENT4B)
ENSG00000124422	ubiquitin specific peptidase 22(USP22)
ENSG00000135913	ubiquitin specific peptidase 37(USP37)
ENSG00000106608	upregulator of cell proliferation(URGCP)
ENSG00000132612	vacuolar protein sorting 4 homolog A(VPS4A)
ENSG00000170631	zinc finger protein 16(ZNF16)
ENSG00000086827	zw10 kinetochore protein(ZW10)

## Sheet: DAVID, top 10, up
Annotation Cluster 1	Enrichment Score: 5.9774673606304365
"cholesterol metabolism"
Category	Term	Count	%	PValue	Genes	List Total	Pop Hits	Pop Total	Fold Enrichment	Bonferroni	Benjamini	FDR
GOTERM_BP_DIRECT	GO:0006695~cholesterol biosynthetic process	16	1.22324	1.77091e-08	ENSG00000052802, ENSG00000067064, ENSG00000110921, ENSG00000147383, ENSG00000112972, ENSG00000132196, ENSG00000172893, ENSG00000125629, ENSG00000113161, ENSG00000186480, ENSG00000160285, ENSG00000149809, ENSG00000167508, ENSG00000079459, ENSG00000205808, ENSG00000147155	1140	29	11420	5.52692	7.95817e-05	7.95671e-05	7.94432e-05
UP_KW_BIOLOGICAL_PROCESS	KW-0752~Steroid biosynthesis	16	1.22324	4.18529e-08	ENSG00000052802, ENSG00000067064, ENSG00000149084, ENSG00000110921, ENSG00000133935, ENSG00000147383, ENSG00000112972, ENSG00000132196, ENSG00000109929, ENSG00000172893, ENSG00000113161, ENSG00000160285, ENSG00000149809, ENSG00000167508, ENSG00000079459, ENSG00000147155	694	32	7375	5.3134	5.52457e-06	3.80939e-06	3.49433e-06
UP_KW_BIOLOGICAL_PROCESS	KW-0756~Sterol biosynthesis	13	0.993884	5.72841e-08	ENSG00000052802, ENSG00000067064, ENSG00000110921, ENSG00000133935, ENSG00000147383, ENSG00000112972, ENSG00000109929, ENSG00000172893, ENSG00000113161, ENSG00000149809, ENSG00000167508, ENSG00000079459, ENSG00000147155	694	21	7375	6.5785	7.56148e-06	3.80939e-06	3.49433e-06
UP_KW_BIOLOGICAL_PROCESS	KW-1207~Sterol metabolism	20	1.52905	1.86839e-07	ENSG00000052802, ENSG00000107566, ENSG00000067064, ENSG00000110921, ENSG00000133935, ENSG00000147383, ENSG00000112972, ENSG00000109929, ENSG00000172893, ENSG00000130164, ENSG00000119655, ENSG00000125629, ENSG00000113161, ENSG00000186480, ENSG00000149809, ENSG00000167508, ENSG00000079459, ENSG00000147155, ENSG00000141458, ENSG00000147852	694	54	7375	3.93585	2.46624e-05	6.2124e-06	5.69859e-06
GOTERM_BP_DIRECT	GO:0016126~sterol biosynthetic process	11	0.840979	4.28034e-07	ENSG00000052802, ENSG00000113161, ENSG00000125629, ENSG00000186480, ENSG00000149809, ENSG00000133935, ENSG00000104549, ENSG00000079459, ENSG00000147155, ENSG00000109929, ENSG00000172893	1140	16	11420	6.88706	0.00192173	0.000961578	0.00096008
UP_KW_BIOLOGICAL_PROCESS	KW-0152~Cholesterol biosynthesis	11	0.840979	5.31762e-07	ENSG00000052802, ENSG00000113161, ENSG00000067064, ENSG00000149809, ENSG00000110921, ENSG00000147383, ENSG00000167508, ENSG00000112972, ENSG00000079459, ENSG00000147155, ENSG00000172893	694	17	7375	6.87617	7.01901e-05	1.18138e-05	1.08367e-05
UP_KW_BIOLOGICAL_PROCESS	KW-0753~Steroid metabolism	22	1.68196	5.32952e-07	ENSG00000052802, ENSG00000107566, ENSG00000067064, ENSG00000110921, ENSG00000133935, ENSG00000147383, ENSG00000112972, ENSG00000109929, ENSG00000172893, ENSG00000196502, ENSG00000130164, ENSG00000025423, ENSG00000119655, ENSG00000125629, ENSG00000113161, ENSG00000186480, ENSG00000149809, ENSG00000167508, ENSG00000079459, ENSG00000147155, ENSG00000141458, ENSG00000147852	694	68	7375	3.43808	7.03472e-05	1.18138e-05	1.08367e-05
UP_KW_BIOLOGICAL_PROCESS	KW-0153~Cholesterol metabolism	18	1.37615	1.44348e-06	ENSG00000052802, ENSG00000107566, ENSG00000067064, ENSG00000110921, ENSG00000147383, ENSG00000112972, ENSG00000172893, ENSG00000130164, ENSG00000119655, ENSG00000125629, ENSG00000113161, ENSG00000186480, ENSG00000149809, ENSG00000167508, ENSG00000079459, ENSG00000147155, ENSG00000141458, ENSG00000147852	694	50	7375	3.82565	0.000190522	2.39979e-05	2.20131e-05
UP_KW_BIOLOGICAL_PROCESS	KW-0444~Lipid biosynthesis	27	2.06422	0.000172776	ENSG00000101290, ENSG00000110921, ENSG00000132196, ENSG00000134255, ENSG00000172893, ENSG00000059377, ENSG00000167508, ENSG00000188921, ENSG00000147155, ENSG00000100344, ENSG00000134824, ENSG00000067064, ENSG00000052802, ENSG00000149084, ENSG00000149485, ENSG00000133935, ENSG00000147383, ENSG00000112972, ENSG00000131791, ENSG00000116711, ENSG00000109929, ENSG00000113161, ENSG00000099194, ENSG0000…	694	131	7375	2.19026	0.0225503	0.00208902	0.00191625
GOTERM_BP_DIRECT	GO:0008203~cholesterol metabolic process	13	0.993884	0.00700041	ENSG00000107566, ENSG00000147383, ENSG00000104549, ENSG00000116678, ENSG00000130164, ENSG00000112033, ENSG00000119655, ENSG00000125629, ENSG00000186480, ENSG00000121691, ENSG00000147155, ENSG00000141458, ENSG00000147852	1140	55	11420	2.36778	1	0.857336	0.856001
Annotation Cluster 2	Enrichment Score: 5.014339975206308
"immune cell activation"
Category	Term	Count	%	PValue	Genes	List Total	Pop Hits	Pop Total	Fold Enrichment	Bonferroni	Benjamini	FDR
UP_KW_BIOLOGICAL_PROCESS	KW-0391~Immunity	73	5.58104	1.13328e-07	ENSG00000185507, ENSG00000134954, ENSG00000243317, ENSG00000179344, ENSG00000149131, ENSG00000159335, ENSG00000117335, ENSG00000145416, ENSG00000205808, ENSG00000169508, ENSG00000167207, ENSG00000166710, ENSG00000163565, ENSG00000105223, ENSG00000136869, ENSG00000131015, ENSG00000132824, ENSG00000173372, ENSG00000197766, ENSG00000134242, ENSG00000115267, ENSG00000114013, ENSG00000170458, ENSG0000…	694	414	7375	1.87381	1.49592e-05	5.0242e-06	4.60866e-06
UP_KW_BIOLOGICAL_PROCESS	KW-0399~Innate immunity	48	3.66972	2.39971e-05	ENSG00000185507, ENSG00000123240, ENSG00000149131, ENSG00000121060, ENSG00000243317, ENSG00000159674, ENSG00000111335, ENSG00000117335, ENSG00000131981, ENSG00000163221, ENSG00000126759, ENSG00000089127, ENSG00000108561, ENSG00000101336, ENSG00000205808, ENSG00000167207, ENSG00000163565, ENSG00000105298, ENSG00000156599, ENSG00000136869, ENSG00000132824, ENSG00000173372, ENSG00000211697, ENSG0000…	694	272	7375	1.87532	0.00316265	0.000354624	0.000325294
GOTERM_BP_DIRECT	GO:0045087~innate immune response	52	3.97554	0.000333031	ENSG00000185507, ENSG00000243317, ENSG00000149131, ENSG00000117335, ENSG00000205808, ENSG00000167207, ENSG00000166710, ENSG00000163565, ENSG00000136869, ENSG00000132824, ENSG00000173372, ENSG00000115267, ENSG00000170458, ENSG00000143546, ENSG00000139178, ENSG00000126709, ENSG00000083799, ENSG00000158473, ENSG00000026297, ENSG00000128604, ENSG00000164825, ENSG00000101782, ENSG00000129657, ENSG0000…	1140	315	11420	1.65369	0.776175	0.149631	0.149398
Annotation Cluster 3	Enrichment Score: 1.5677712513333388
"monosaccharide transport"
Category	Term	Count	%	PValue	Genes	List Total	Pop Hits	Pop Total	Fold Enrichment	Bonferroni	Benjamini	FDR
GOTERM_BP_DIRECT	GO:1904659~glucose transmembrane transport	6	0.458716	0.00635399	ENSG00000142583, ENSG00000117394, ENSG00000198743, ENSG00000112033, ENSG00000160326, ENSG00000059804	1140	13	11420	4.62348	1	0.842761	0.841448
UP_KW_BIOLOGICAL_PROCESS	KW-0762~Sugar transport	9	0.688073	0.00652091	ENSG00000134955, ENSG00000142583, ENSG00000117394, ENSG00000130958, ENSG00000138459, ENSG00000142208, ENSG00000160326, ENSG00000059804, ENSG00000117620	694	31	7375	3.0852	0.57835	0.0667139	0.0611962
GOTERM_BP_DIRECT	GO:0015749~monosaccharide transport	3	0.229358	0.113705	ENSG00000142583, ENSG00000117394, ENSG00000059804	1140	6	11420	5.00877	1	1	0.998664
GOTERM_BP_DIRECT	GO:0070837~dehydroascorbic acid transport	3	0.229358	0.113705	ENSG00000117394, ENSG00000160326, ENSG00000059804	1140	6	11420	5.00877	1	1	0.998664
Annotation Cluster 4	Enrichment Score: 1.5113258787517616
"complement activation"
Category	Term	Count	%	PValue	Genes	List Total	Pop Hits	Pop Total	Fold Enrichment	Bonferroni	Benjamini	FDR
GOTERM_BP_DIRECT	GO:0006956~complement activation	5	0.382263	0.00495787	ENSG00000126759, ENSG00000173372, ENSG00000197766, ENSG00000102760, ENSG00000125730	1140	8	11420	6.26096	1	0.793839	0.792602
UP_KW_BIOLOGICAL_PROCESS	KW-0179~Complement alternate pathway	3	0.229358	0.0727835	ENSG00000126759, ENSG00000197766, ENSG00000125730	694	5	7375	6.37608	0.999953	0.537789	0.49331
GOTERM_BP_DIRECT	GO:0006957~complement activation, alternative pathway	3	0.229358	0.081039	ENSG00000126759, ENSG00000197766, ENSG00000125730	1140	5	11420	6.01053	1	1	0.998664
Annotation Cluster 5	Enrichment Score: 1.3572424899391735
"cholesterol transport"
Category	Term	Count	%	PValue	Genes	List Total	Pop Hits	Pop Total	Fold Enrichment	Bonferroni	Benjamini	FDR
GOTERM_BP_DIRECT	GO:0071404~cellular response to low-density lipoprotein particle stimulus	6	0.458716	0.01675	ENSG00000010278, ENSG00000135218, ENSG00000112972, ENSG00000160255, ENSG00000141458, ENSG00000130164	1140	16	11420	3.75658	1	1	0.998664
GOTERM_BP_DIRECT	GO:0030299~intestinal cholesterol absorption	3	0.229358	0.0520151	ENSG00000135218, ENSG00000141458, ENSG00000130164	1140	4	11420	7.51316	1	1	0.998664
GOTERM_BP_DIRECT	GO:0030301~cholesterol transport	5	0.382263	0.0973032	ENSG00000119655, ENSG00000135218, ENSG00000010270, ENSG00000141458, ENSG00000130164	1140	18	11420	2.78265	1	1	0.998664
Annotation Cluster 6	Enrichment Score: 1.348309190395853
"positive regulation of cytokine production"
Category	Term	Count	%	PValue	Genes	List Total	Pop Hits	Pop Total	Fold Enrichment	Bonferroni	Benjamini	FDR
GOTERM_BP_DIRECT	GO:0060907~positive regulation of macrophage cytokine production	7	0.535168	0.0178944	ENSG00000110218, ENSG00000089041, ENSG00000172936, ENSG00000136869, ENSG00000135218, ENSG00000159674, ENSG00000167207	1140	22	11420	3.1874	1	1	0.998664
GOTERM_BP_DIRECT	GO:0032731~positive regulation of interleukin-1 beta production	10	0.764526	0.0566771	ENSG00000110218, ENSG00000089041, ENSG00000172936, ENSG00000136869, ENSG00000135218, ENSG00000243317, ENSG00000064012, ENSG00000105483, ENSG00000167207, ENSG00000163565	1140	50	11420	2.00351	1	1	0.998664
GOTERM_BP_DIRECT	GO:1900227~positive regulation of NLRP3 inflammasome complex assembly	4	0.30581	0.0889096	ENSG00000172936, ENSG00000136869, ENSG00000135218, ENSG00000243317	1140	11	11420	3.64274	1	1	0.998664
Annotation Cluster 7	Enrichment Score: 1.3456609286299825
"antibacterial immune response"
Category	Term	Count	%	PValue	Genes	List Total	Pop Hits	Pop Total	Fold Enrichment	Bonferroni	Benjamini	FDR
GOTERM_BP_DIRECT	GO:0061844~antimicrobial humoral immune response mediated by antimicrobial peptide	10	0.764526	0.020555	ENSG00000148926, ENSG00000169413, ENSG00000163221, ENSG00000164047, ENSG00000164825, ENSG00000184678, ENSG00000166710, ENSG00000169429, ENSG00000151882, ENSG00000131981	1140	42	11420	2.38513	1	1	0.998664
GOTERM_BP_DIRECT	GO:0050830~defense response to Gram-positive bacterium	12	0.917431	0.0297428	ENSG00000089041, ENSG00000148926, ENSG00000172936, ENSG00000135218, ENSG00000169413, ENSG00000164047, ENSG00000164825, ENSG00000129538, ENSG00000184678, ENSG00000167207, ENSG00000150782, ENSG00000166710	1140	59	11420	2.03747	1	1	0.998664
GOTERM_BP_DIRECT	GO:0019731~antibacterial humoral response	7	0.535168	0.0328617	ENSG00000148926, ENSG00000169413, ENSG00000164047, ENSG00000124107, ENSG00000164825, ENSG00000184678, ENSG00000166710	1140	25	11420	2.80491	1	1	0.998664
GOTERM_BP_DIRECT	GO:0050829~defense response to Gram-negative bacterium	8	0.611621	0.0699648	ENSG00000148926, ENSG00000136869, ENSG00000169413, ENSG00000164047, ENSG00000123240, ENSG00000164825, ENSG00000166710, ENSG00000010610	1140	37	11420	2.16596	1	1	0.998664
GOTERM_BP_DIRECT	GO:0002227~innate immune response in mucosa	4	0.30581	0.132993	ENSG00000164047, ENSG00000164825, ENSG00000184678, ENSG00000167207	1140	13	11420	3.08232	1	1	0.998664
Annotation Cluster 8	Enrichment Score: 1.185424572435143
"unfolded protein response"
Category	Term	Count	%	PValue	Genes	List Total	Pop Hits	Pop Total	Fold Enrichment	Bonferroni	Benjamini	FDR
GOTERM_BP_DIRECT	GO:0042026~protein refolding	7	0.535168	0.0110424	ENSG00000204389, ENSG00000126803, ENSG00000173110, ENSG00000204388, ENSG00000166710, ENSG00000109971, ENSG00000080824	1140	20	11420	3.50614	1	1	0.998664
GOTERM_BP_DIRECT	GO:0051085~chaperone mediated protein folding requiring cofactor	8	0.611621	0.0253262	ENSG00000204389, ENSG00000126803, ENSG00000173110, ENSG00000204388, ENSG00000132581, ENSG00000197930, ENSG00000109971, ENSG00000120694	1140	30	11420	2.67135	1	1	0.998664
GOTERM_BP_DIRECT	GO:0034620~cellular response to unfolded protein	7	0.535168	0.0328617	ENSG00000123240, ENSG00000204389, ENSG00000126803, ENSG00000173110, ENSG00000204388, ENSG00000109971, ENSG00000139644	1140	25	11420	2.80491	1	1	0.998664
UP_KW_BIOLOGICAL_PROCESS	KW-0346~Stress response	13	0.993884	0.0862313	ENSG00000173110, ENSG00000164070, ENSG00000080824, ENSG00000166598, ENSG00000110172, ENSG00000204389, ENSG00000126803, ENSG00000204388, ENSG00000183484, ENSG00000149257, ENSG00000100784, ENSG00000109971, ENSG00000120694	694	83	7375	1.66444	0.999993	0.603619	0.553696
GOTERM_BP_DIRECT	GO:0071383~cellular response to steroid hormone stimulus	4	0.30581	0.110098	ENSG00000204389, ENSG00000204388, ENSG00000141458, ENSG00000109971	1140	12	11420	3.33918	1	1	0.998664
GOTERM_BP_DIRECT	GO:0090084~negative regulation of inclusion body assembly	3	0.229358	0.224224	ENSG00000204389, ENSG00000126803, ENSG00000204388	1140	9	11420	3.33918	1	1	0.998664
GOTERM_BP_DIRECT	GO:0046034~ATP metabolic process	5	0.382263	0.257382	ENSG00000135318, ENSG00000204389, ENSG00000204388, ENSG00000109971, ENSG00000162433	1140	26	11420	1.92645	1	1	0.998664
Annotation Cluster 9	Enrichment Score: 1.132602617169804
"protein folding"
Category	Term	Count	%	PValue	Genes	List Total	Pop Hits	Pop Total	Fold Enrichment	Bonferroni	Benjamini	FDR
GOTERM_BP_DIRECT	GO:0042026~protein refolding	7	0.535168	0.0110424	ENSG00000204389, ENSG00000126803, ENSG00000173110, ENSG00000204388, ENSG00000166710, ENSG00000109971, ENSG00000080824	1140	20	11420	3.50614	1	1	0.998664
GOTERM_BP_DIRECT	GO:0034605~cellular response to heat	7	0.535168	0.172931	ENSG00000100292, ENSG00000204389, ENSG00000173110, ENSG00000204388, ENSG00000164609, ENSG00000174437, ENSG00000080824	1140	38	11420	1.84534	1	1	0.998664
GOTERM_BP_DIRECT	GO:0031396~regulation of protein ubiquitination	4	0.30581	0.209535	ENSG00000106799, ENSG00000204389, ENSG00000204388, ENSG00000080824	1140	16	11420	2.50439	1	1	0.998664
Annotation Cluster 10	Enrichment Score: 1.0579401731173488
"glycolysis"
Category	Term	Count	%	PValue	Genes	List Total	Pop Hits	Pop Total	Fold Enrichment	Bonferroni	Benjamini	FDR
GOTERM_BP_DIRECT	GO:0006096~glycolytic process	7	0.535168	0.0392367	ENSG00000149925, ENSG00000067225, ENSG00000159322, ENSG00000159399, ENSG00000134333, ENSG00000079739, ENSG00000102144	1140	26	11420	2.69703	1	1	0.998664
UP_KW_BIOLOGICAL_PROCESS	KW-0324~Glycolysis	5	0.382263	0.128428	ENSG00000149925, ENSG00000067225, ENSG00000159322, ENSG00000159399, ENSG00000102144	694	21	7375	2.53019	1	0.742648	0.681226
GOTERM_BP_DIRECT	GO:0061621~canonical glycolysis	4	0.30581	0.132993	ENSG00000067225, ENSG00000164916, ENSG00000159399, ENSG00000102144	1140	13	11420	3.08232	1	1	0.998664

## Sheet: DAVID, top 2, genes, up
Annotation cluster 1 "cholesterol metabolism"			Annotation cluster 1 "immune cell activation"
ensembl_gene_ID	external_gene_name		ensembl_gene_ID	external_gene_name
ENSG00000113161	3-hydroxy-3-methylglutaryl-CoA reductase(HMGCR)		ENSG00000089127	2'-5'-oligoadenylate synthetase 1(OAS1)
ENSG00000112972	3-hydroxy-3-methylglutaryl-CoA synthase 1(HMGCS1)		ENSG00000111335	2'-5'-oligoadenylate synthetase 2(OAS2)
ENSG00000188921	3-hydroxyacyl-CoA dehydratase 4(HACD4)		ENSG00000168329	C-X3-C motif chemokine receptor 1(CX3CR1)
ENSG00000172893	7-dehydrocholesterol reductase(DHCR7)		ENSG00000170458	CD14 molecule(CD14)
ENSG00000101290	CDP-diacylglycerol synthase 2(CDS2)		ENSG00000134061	CD180 molecule(CD180)
ENSG00000147155	EBP cholestenol delta-isomerase(EBP)		ENSG00000158473	CD1d molecule(CD1D)
ENSG00000107566	ER lipid raft associated 1(ERLIN1)		ENSG00000167851	CD300a molecule(CD300A)
ENSG00000165175	MID1 interacting protein 1(MID1IP1)		ENSG00000010610	CD4 molecule(CD4)
ENSG00000147383	NAD(P) dependent steroid dehydrogenase-like(NSDHL)		ENSG00000101017	CD40 molecule(CD40)
ENSG00000141458	NPC intracellular cholesterol transporter 1(NPC1)		ENSG00000117335	CD46 molecule(CD46)
ENSG00000119655	NPC intracellular cholesterol transporter 2(NPC2)		ENSG00000114013	CD86 molecule(CD86)
ENSG00000121691	catalase(CAT)		ENSG00000083799	CYLD lysine 63 deubiquitinase(CYLD)
ENSG00000134255	choline/ethanolamine phosphotransferase 1(CEPT1)		ENSG00000107201	DExD/H-box helicase 58(DDX58)
ENSG00000133935	ergosterol biosynthesis 28 homolog(ERG28)		ENSG00000134954	ETS proto-oncogene 1, transcription factor(ETS1)
ENSG00000079459	farnesyl-diphosphate farnesyltransferase 1(FDFT1)		ENSG00000010810	FYN proto-oncogene, Src family tyrosine kinase(FYN)
ENSG00000149485	fatty acid desaturase 1(FADS1)		ENSG00000169508	G protein-coupled receptor 183(GPR183)
ENSG00000134824	fatty acid desaturase 2(FADS2)		ENSG00000101336	HCK proto-oncogene, Src family tyrosine kinase(HCK)
ENSG00000149084	hydroxysteroid 17-beta dehydrogenase 12(HSD17B12)		ENSG00000172936	MYD88 innate immune signal transduction adaptor(MYD88)
ENSG00000025423	hydroxysteroid 17-beta dehydrogenase 6(HSD17B6)		ENSG00000120526	NudC domain containing 1(NUDCD1)
ENSG00000132196	hydroxysteroid 17-beta dehydrogenase 7(HSD17B7)		ENSG00000101782	RIO kinase 3(RIOK3)
ENSG00000186480	insulin induced gene 1(INSIG1)		ENSG00000163221	S100 calcium binding protein A12(S100A12)
ENSG00000125629	insulin induced gene 2(INSIG2)		ENSG00000143546	S100 calcium binding protein A8(S100A8)
ENSG00000067064	isopentenyl-diphosphate delta isomerase 1(IDI1)		ENSG00000129657	SEC14 like lipid binding 1(SEC14L1)
ENSG00000160285	lanosterol synthase(LSS)		ENSG00000138468	SUMO specific peptidase 7(SENP7)
ENSG00000116678	leptin receptor(LEPR)		ENSG00000211697	T cell receptor gamma variable 5(TRGV5)
ENSG00000130164	low density lipoprotein receptor(LDLR)		ENSG00000163154	TNF alpha induced protein 8 like 2(TNFAIP8L2)
ENSG00000052802	methylsterol monooxygenase 1(MSMO1)		ENSG00000131015	UL16 binding protein 2(ULBP2)
ENSG00000167508	mevalonate diphosphate decarboxylase(MVD)		ENSG00000174837	adhesion G protein-coupled receptor E1(ADGRE1)
ENSG00000110921	mevalonate kinase(MVK)		ENSG00000166710	beta-2-microglobulin(B2M)
ENSG00000100344	patatin like phospholipase domain containing 3(PNPLA3)		ENSG00000105298	cactin, spliceosome C complex subunit(CACTIN)
ENSG00000112033	peroxisome proliferator activated receptor delta(PPARD)		ENSG00000105483	caspase recruitment domain family member 8(CARD8)
ENSG00000116711	phospholipase A2 group IVA(PLA2G4A)		ENSG00000164047	cathelicidin antimicrobial peptide(CAMP)
ENSG00000205808	phospholipid phosphatase 6(PLPP6)		ENSG00000182985	cell adhesion molecule 1(CADM1)
ENSG00000131791	protein kinase AMP-activated non-catalytic subunit beta 2(PRKAB2)		ENSG00000182578	colony stimulating factor 1 receptor(CSF1R)
ENSG00000104549	squalene epoxidase(SQLE)		ENSG00000173372	complement C1q A chain(C1QA)
ENSG00000099194	stearoyl-CoA desaturase(SCD)		ENSG00000108561	complement C1q binding protein(C1QBP)
ENSG00000109929	sterol-C5-desaturase(SC5D)		ENSG00000139178	complement C1r subcomponent like(C1RL)
ENSG00000196502	sulfotransferase family 1A member 1(SULT1A1)		ENSG00000125730	complement C3(C3)
ENSG00000059377	thromboxane A synthase 1(TBXAS1)		ENSG00000197766	complement factor D(CFD)
ENSG00000149809	transmembrane 7 superfamily member 2(TM7SF2)		ENSG00000126759	complement factor properdin(CFP)
ENSG00000147852	very low density lipoprotein receptor(VLDLR)		ENSG00000165168	cytochrome b-245 beta chain(CYBB)
			ENSG00000164825	defensin beta 1(DEFB1)
			ENSG00000131981	galectin 3(LGALS3)
			ENSG00000117226	guanylate binding protein 3(GBP3)
			ENSG00000169896	integrin subunit alpha M(ITGAM)
			ENSG00000126709	interferon alpha inducible protein 6(IFI6)
			ENSG00000163565	interferon gamma inducible protein 16(IFI16)
			ENSG00000115267	interferon induced with helicase C domain 1(IFIH1)
			ENSG00000128604	interferon regulatory factor 5(IRF5)
			ENSG00000185507	interferon regulatory factor 7(IRF7)
			ENSG00000160593	junction adhesion molecule like(JAML)
			ENSG00000179344	major histocompatibility complex, class II, DQ beta 1(HLA-DQB1)
			ENSG00000204287	major histocompatibility complex, class II, DR alpha(HLA-DRA)
			ENSG00000145416	membrane associated ring-CH-type finger 1(MARCHF1)
			ENSG00000136286	myosin IG(MYO1G)
			ENSG00000116701	neutrophil cytosolic factor 2(NCF2)
			ENSG00000167207	nucleotide binding oligomerization domain containing 2(NOD2)
			ENSG00000123240	optineurin(OPTN)
			ENSG00000159335	parathymosin(PTMS)
			ENSG00000105223	phospholipase D family member 3(PLD3)
			ENSG00000205808	phospholipid phosphatase 6(PLPP6)
			ENSG00000198961	praja ring finger ubiquitin ligase 2(PJA2)
			ENSG00000166501	protein kinase C beta(PRKCB)
			ENSG00000134242	protein tyrosine phosphatase non-receptor type 22(PTPN22)
			ENSG00000169413	ribonuclease A family member k6(RNASE6)
			ENSG00000026297	ribonuclease T2(RNASET2)
			ENSG00000172716	schlafen family member 11(SLFN11)
			ENSG00000124107	secretory leukocyte peptidase inhibitor(SLPI)
			ENSG00000196189	semaphorin 4A(SEMA4A)
			ENSG00000132824	serine incorporator 3(SERINC3)
			ENSG00000149131	serpin family G member 1(SERPING1)
			ENSG00000243317	short transmembrane mitochondrial protein 1(STMP1)
			ENSG00000159674	spondin 2(SPON2)
			ENSG00000130775	thymocyte selection associated family member 2(THEMIS2)
			ENSG00000174125	toll like receptor 1(TLR1)
			ENSG00000136869	toll like receptor 4(TLR4)
			ENSG00000132274	tripartite motif containing 22(TRIM22)
			ENSG00000121060	tripartite motif containing 25(TRIM25)
			ENSG00000146833	tripartite motif containing 4(TRIM4)
			ENSG00000156599	zinc finger DHHC-type palmitoyltransferase 5(ZDHHC5)
