# Supplementary material for: Hypoxia-altered cholesterol homeostasis enhances the expression of interferon-stimulated genes upon SARS-CoV-2 infections in monocytes
Source: Front Immunol. 2023 Jun 12;14:1121864. doi: 10.3389/fimmu.2023.1121864 (PMC10291055; doi:10.3389/fimmu.2023.1121864)
Supplement: Supplementary Table 3 — Putative hypoxia-induced ISGs identified by Interferome. [file DataSheet_3.xlsx]

## Sheet: potential_ISGs
Dataset ID	Fold Change	Interferon Type	Treatment Time	Gene Name	Description	GenBank Accession	Ensembl ID	Probe ID
317	4.021	II	18	AMICA1	adhesion molecule, interacts with CXADR antigen 1 [Source:HGNC Symbol;Acc:19084]		ENSG00000160593	A_24_P192914
312	2.36323	II	144	AMICA1	adhesion molecule, interacts with CXADR antigen 1 [Source:HGNC Symbol;Acc:19084]		ENSG00000160593	228094_at
313	3.08975	II	72	AMICA1	adhesion molecule, interacts with CXADR antigen 1 [Source:HGNC Symbol;Acc:19084]		ENSG00000160593	228094_at
314	3.5221	II	24	AMICA1	adhesion molecule, interacts with CXADR antigen 1 [Source:HGNC Symbol;Acc:19084]		ENSG00000160593	228094_at
124	2.8235	II	168	AMICA1	adhesion molecule, interacts with CXADR antigen 1 [Source:HGNC Symbol;Acc:19084]		ENSG00000160593	ILMN_1778723
317	3.02838	II	18	AMICA1	adhesion molecule, interacts with CXADR antigen 1 [Source:HGNC Symbol;Acc:19084]		ENSG00000160593	A_23_P1759
12	2.8719	II	24	B2M	beta-2-microglobulin [Source:HGNC Symbol;Acc:914]	AAD14387	ENSG00000166710	216231_s_at
14	2.03061	I	24	B2M	beta-2-microglobulin [Source:HGNC Symbol;Acc:914]	AAD14387	ENSG00000166710	216231_s_at
68	4.62526	II	96	B2M	beta-2-microglobulin [Source:HGNC Symbol;Acc:914]	AAD14387	ENSG00000166710	216231_s_at
12	3.08352	II	24	B2M	beta-2-microglobulin [Source:HGNC Symbol;Acc:914]	AAD14387	ENSG00000166710	201891_s_at
14	2.36619	I	24	B2M	beta-2-microglobulin [Source:HGNC Symbol;Acc:914]	AAD14387	ENSG00000166710	201891_s_at
68	2.46537	II	96	B2M	beta-2-microglobulin [Source:HGNC Symbol;Acc:914]	AAD14387	ENSG00000166710	201891_s_at
144	2.01888	II	24	B2M	beta-2-microglobulin [Source:HGNC Symbol;Acc:914]	AAD14387	ENSG00000166710	201891_s_at
128	2.58894	II	10	B2M	beta-2-microglobulin [Source:HGNC Symbol;Acc:914]	AAD14387	ENSG00000166710	ILMN_2148459
129	2.57925	I	10	B2M	beta-2-microglobulin [Source:HGNC Symbol;Acc:914]	AAD14387	ENSG00000166710	ILMN_2148459
130	2.20128	I	10	B2M	beta-2-microglobulin [Source:HGNC Symbol;Acc:914]	AAD14387	ENSG00000166710	ILMN_2148459
131	2.78158	II	10	B2M	beta-2-microglobulin [Source:HGNC Symbol;Acc:914]	AAD14387	ENSG00000166710	ILMN_2148459
200	2.26009	I	10	B2M	beta-2-microglobulin [Source:HGNC Symbol;Acc:914]	AAD14387	ENSG00000166710	ILMN_2148459
249	2.65664	I	12	B2M	beta-2-microglobulin [Source:HGNC Symbol;Acc:914]	AAD14387	ENSG00000166710	ILMN_2148459
251	3.50224	I	24	B2M	beta-2-microglobulin [Source:HGNC Symbol;Acc:914]	AAD14387	ENSG00000166710	ILMN_2148459
279	2.3702	I	48	B2M	beta-2-microglobulin [Source:HGNC Symbol;Acc:914]	AAD14387	ENSG00000166710	ILMN_2148459
281	2.56419	I	48	B2M	beta-2-microglobulin [Source:HGNC Symbol;Acc:914]	AAD14387	ENSG00000166710	ILMN_2148459
353	2.05722	I	24	B2M	beta-2-microglobulin [Source:HGNC Symbol;Acc:914]	AAD14387	ENSG00000166710	ILMN_2148459
373	4.34951	I	24	B2M	beta-2-microglobulin [Source:HGNC Symbol;Acc:914]	AAD14387	ENSG00000166710	ILMN_2148459
374	2.25627	I	6	B2M	beta-2-microglobulin [Source:HGNC Symbol;Acc:914]	AAD14387	ENSG00000166710	ILMN_2148459
375	2.33315	I	6	B2M	beta-2-microglobulin [Source:HGNC Symbol;Acc:914]	AAD14387	ENSG00000166710	ILMN_2148459
376	3.17782	I	24	B2M	beta-2-microglobulin [Source:HGNC Symbol;Acc:914]	AAD14387	ENSG00000166710	ILMN_2148459
144	3.67425	II	24	B2M	beta-2-microglobulin [Source:HGNC Symbol;Acc:914]	AAD14387	ENSG00000166710	232311_at
305	2.14827	II	1.5	B2M	beta-2-microglobulin [Source:HGNC Symbol;Acc:914]	AAD14387	ENSG00000166710	232311_at
306	2.37997	I	1.5	B2M	beta-2-microglobulin [Source:HGNC Symbol;Acc:914]	AAD14387	ENSG00000166710	232311_at
311	2.84318	II	24	B2M	beta-2-microglobulin [Source:HGNC Symbol;Acc:914]	AAD14387	ENSG00000166710	232311_at
313	3.48226	II	72	B2M	beta-2-microglobulin [Source:HGNC Symbol;Acc:914]	AAD14387	ENSG00000166710	232311_at
85	2.40538	II	48	B2M	beta-2-microglobulin [Source:HGNC Symbol;Acc:914]	AAD14387	ENSG00000166710	ILMN_1725427
200	2.22454	I	10	B2M	beta-2-microglobulin [Source:HGNC Symbol;Acc:914]	AAD14387	ENSG00000166710	ILMN_1725427
249	2.92948	I	12	B2M	beta-2-microglobulin [Source:HGNC Symbol;Acc:914]	AAD14387	ENSG00000166710	ILMN_1725427
251	3.7872	I	24	B2M	beta-2-microglobulin [Source:HGNC Symbol;Acc:914]	AAD14387	ENSG00000166710	ILMN_1725427
254	2.03635	I	6	B2M	beta-2-microglobulin [Source:HGNC Symbol;Acc:914]	AAD14387	ENSG00000166710	ILMN_1725427
279	2.67021	I	48	B2M	beta-2-microglobulin [Source:HGNC Symbol;Acc:914]	AAD14387	ENSG00000166710	ILMN_1725427
281	2.75695	I	48	B2M	beta-2-microglobulin [Source:HGNC Symbol;Acc:914]	AAD14387	ENSG00000166710	ILMN_1725427
353	2.07094	I	24	B2M	beta-2-microglobulin [Source:HGNC Symbol;Acc:914]	AAD14387	ENSG00000166710	ILMN_1725427
373	4.37825	I	24	B2M	beta-2-microglobulin [Source:HGNC Symbol;Acc:914]	AAD14387	ENSG00000166710	ILMN_1725427
374	2.14556	I	6	B2M	beta-2-microglobulin [Source:HGNC Symbol;Acc:914]	AAD14387	ENSG00000166710	ILMN_1725427
375	2.41145	I	6	B2M	beta-2-microglobulin [Source:HGNC Symbol;Acc:914]	AAD14387	ENSG00000166710	ILMN_1725427
376	3.49125	I	24	B2M	beta-2-microglobulin [Source:HGNC Symbol;Acc:914]	AAD14387	ENSG00000166710	ILMN_1725427
88	2.28745	II	24	B2M	beta-2-microglobulin [Source:HGNC Symbol;Acc:914]	AAD14387	ENSG00000166710	7983360
90	2.34535	II	72	B2M	beta-2-microglobulin [Source:HGNC Symbol;Acc:914]	AAD14387	ENSG00000166710	7983360
319	3.75749	II	18	B2M	beta-2-microglobulin [Source:HGNC Symbol;Acc:914]	AAD14387	ENSG00000166710	A_24_P740662
174	2.60255	II	20	C1QA	complement component 1, q subcomponent, A chain [Source:HGNC Symbol;Acc:1241]		ENSG00000173372	A_24_P222655
64	2.3499	II	24	C1QA	complement component 1, q subcomponent, A chain [Source:HGNC Symbol;Acc:1241]		ENSG00000173372	218232_at
312	7.09687	II	144	C1QA	complement component 1, q subcomponent, A chain [Source:HGNC Symbol;Acc:1241]		ENSG00000173372	218232_at
313	5.07164	II	72	C1QA	complement component 1, q subcomponent, A chain [Source:HGNC Symbol;Acc:1241]		ENSG00000173372	218232_at
123	3.15424	II	168	C1QA	complement component 1, q subcomponent, A chain [Source:HGNC Symbol;Acc:1241]		ENSG00000173372	ILMN_1737918
124	6.88058	II	168	C1QA	complement component 1, q subcomponent, A chain [Source:HGNC Symbol;Acc:1241]		ENSG00000173372	ILMN_1737918
126	11.7378	II	24	C1RL	complement component 1, r subcomponent-like [Source:HGNC Symbol;Acc:21265]	AAH62428	ENSG00000139178	A_23_P363968
173	6.04693	II	20	C1RL	complement component 1, r subcomponent-like [Source:HGNC Symbol;Acc:21265]	AAH62428	ENSG00000139178	A_23_P363968
174	4.50326	II	20	C1RL	complement component 1, r subcomponent-like [Source:HGNC Symbol;Acc:21265]	AAH62428	ENSG00000139178	A_23_P363968
293	4.58201	II	24	C1RL	complement component 1, r subcomponent-like [Source:HGNC Symbol;Acc:21265]	AAH62428	ENSG00000139178	A_23_P363968
12	2.08788	II	24	C1RL	complement component 1, r subcomponent-like [Source:HGNC Symbol;Acc:21265]	AAH62428	ENSG00000139178	218983_at
63	4.16694	II	6	C1RL	complement component 1, r subcomponent-like [Source:HGNC Symbol;Acc:21265]	AAH62428	ENSG00000139178	218983_at
64	5.60185	II	24	C1RL	complement component 1, r subcomponent-like [Source:HGNC Symbol;Acc:21265]	AAH62428	ENSG00000139178	218983_at
144	5.59136	II	24	C1RL	complement component 1, r subcomponent-like [Source:HGNC Symbol;Acc:21265]	AAH62428	ENSG00000139178	218983_at
183	3.60631	II	24	C1RL	complement component 1, r subcomponent-like [Source:HGNC Symbol;Acc:21265]	AAH62428	ENSG00000139178	218983_at
184	3.07654	II	24	C1RL	complement component 1, r subcomponent-like [Source:HGNC Symbol;Acc:21265]	AAH62428	ENSG00000139178	218983_at
295	3.73812	II	24	C1RL	complement component 1, r subcomponent-like [Source:HGNC Symbol;Acc:21265]	AAH62428	ENSG00000139178	218983_at
311	3.47461	II	24	C1RL	complement component 1, r subcomponent-like [Source:HGNC Symbol;Acc:21265]	AAH62428	ENSG00000139178	218983_at
312	2.83789	II	144	C1RL	complement component 1, r subcomponent-like [Source:HGNC Symbol;Acc:21265]	AAH62428	ENSG00000139178	218983_at
313	7.11883	II	72	C1RL	complement component 1, r subcomponent-like [Source:HGNC Symbol;Acc:21265]	AAH62428	ENSG00000139178	218983_at
128	2.16252	II	10	C1RL	complement component 1, r subcomponent-like [Source:HGNC Symbol;Acc:21265]	AAH62428	ENSG00000139178	ILMN_1683687
85	2.73239	II	48	C1RL	complement component 1, r subcomponent-like [Source:HGNC Symbol;Acc:21265]	AAH62428	ENSG00000139178	ILMN_1733288
83	2.39965	II	24	C1RL	complement component 1, r subcomponent-like [Source:HGNC Symbol;Acc:21265]	AAH62428	ENSG00000139178	ILMN_1764109
85	3.3473	II	48	C1RL	complement component 1, r subcomponent-like [Source:HGNC Symbol;Acc:21265]	AAH62428	ENSG00000139178	ILMN_1764109
373	3.82322	I	24	C1RL	complement component 1, r subcomponent-like [Source:HGNC Symbol;Acc:21265]	AAH62428	ENSG00000139178	ILMN_1764109
375	2.03596	I	6	C1RL	complement component 1, r subcomponent-like [Source:HGNC Symbol;Acc:21265]	AAH62428	ENSG00000139178	ILMN_1764109
376	2.65428	I	24	C1RL	complement component 1, r subcomponent-like [Source:HGNC Symbol;Acc:21265]	AAH62428	ENSG00000139178	ILMN_1764109
12	15.4603	II	24	C3	complement component 3 [Source:HGNC Symbol;Acc:1318]		ENSG00000125730	217767_at
13	5.11494	II	6	C3	complement component 3 [Source:HGNC Symbol;Acc:1318]		ENSG00000125730	217767_at
14	4.02036	I	24	C3	complement component 3 [Source:HGNC Symbol;Acc:1318]		ENSG00000125730	217767_at
144	14.2945	II	24	C3	complement component 3 [Source:HGNC Symbol;Acc:1318]		ENSG00000125730	217767_at
295	6.75425	II	24	C3	complement component 3 [Source:HGNC Symbol;Acc:1318]		ENSG00000125730	217767_at
299	2.26885	II	24	C3	complement component 3 [Source:HGNC Symbol;Acc:1318]		ENSG00000125730	217767_at
293	2.07866	II	24	C3	complement component 3 [Source:HGNC Symbol;Acc:1318]		ENSG00000125730	A_23_P101407
83	2.9305	II	24	C3	complement component 3 [Source:HGNC Symbol;Acc:1318]		ENSG00000125730	ILMN_1762260
85	3.4542	II	48	C3	complement component 3 [Source:HGNC Symbol;Acc:1318]		ENSG00000125730	ILMN_1762260
82	2.3104	II	12	C3	complement component 3 [Source:HGNC Symbol;Acc:1318]		ENSG00000125730	ILMN_1713182
83	3.85226	II	24	C3	complement component 3 [Source:HGNC Symbol;Acc:1318]		ENSG00000125730	ILMN_1713182
85	4.27564	II	48	C3	complement component 3 [Source:HGNC Symbol;Acc:1318]		ENSG00000125730	ILMN_1713182
87	3.40392	II	12	C3	complement component 3 [Source:HGNC Symbol;Acc:1318]		ENSG00000125730	8033257
88	4.0704	II	24	C3	complement component 3 [Source:HGNC Symbol;Acc:1318]		ENSG00000125730	8033257
89	2.64744	II	48	C3	complement component 3 [Source:HGNC Symbol;Acc:1318]		ENSG00000125730	8033257
308	3.45145	II	48	C3	complement component 3 [Source:HGNC Symbol;Acc:1318]		ENSG00000125730	8033257
124	3.94539	II	168	CAMP	cathelicidin antimicrobial peptide [Source:HGNC Symbol;Acc:1472]	EAW64854	ENSG00000164047	ILMN_1688580
312	4.96413	II	144	CD14	CD14 molecule [Source:HGNC Symbol;Acc:1628]		ENSG00000170458	201743_at
131	2.55427	II	10	CD14	CD14 molecule [Source:HGNC Symbol;Acc:1628]		ENSG00000170458	ILMN_2396444
251	2.03674	I	24	CD14	CD14 molecule [Source:HGNC Symbol;Acc:1628]		ENSG00000170458	ILMN_2396444
131	2.66937	II	10	CD14	CD14 molecule [Source:HGNC Symbol;Acc:1628]		ENSG00000170458	ILMN_1740015
317	2.25297	II	18	CD180	CD180 molecule [Source:HGNC Symbol;Acc:6726]	BAA12019	ENSG00000134061	A_23_P257815
314	19.0976	II	24	CD180	CD180 molecule [Source:HGNC Symbol;Acc:6726]	BAA12019	ENSG00000134061	206206_at
317	2.77705	II	18	CD180	CD180 molecule [Source:HGNC Symbol;Acc:6726]	BAA12019	ENSG00000134061	A_32_P34703
317	3.82658	II	18	CD1D	CD1d molecule [Source:HGNC Symbol;Acc:1637]	AAA59672	ENSG00000158473	A_23_P74575
314	2.37715	II	24	CD1D	CD1d molecule [Source:HGNC Symbol;Acc:1637]	AAA59672	ENSG00000158473	205789_at
58	3.37679	I	3	CD1D	CD1d molecule [Source:HGNC Symbol;Acc:1637]	AAA59672	ENSG00000158473	38567_at
74	6.28492	I	16	CD1D	CD1d molecule [Source:HGNC Symbol;Acc:1637]	AAA59672	ENSG00000158473	ILMN_1719433
124	2.48994	II	168	CD1D	CD1d molecule [Source:HGNC Symbol;Acc:1637]	AAA59672	ENSG00000158473	ILMN_1719433
160	2.01944	I	18	CD1D	CD1d molecule [Source:HGNC Symbol;Acc:1637]	AAA59672	ENSG00000158473	ILMN_1719433
317	2.51867	II	18	CD300A	CD300a molecule [Source:HGNC Symbol;Acc:19319]		ENSG00000167851	A_23_P207037
317	2.33241	II	18	CD300A	CD300a molecule [Source:HGNC Symbol;Acc:19319]		ENSG00000167851	A_24_P159434
318	2.83514	II	6	CD300A	CD300a molecule [Source:HGNC Symbol;Acc:19319]		ENSG00000167851	A_24_P159434
126	23.9577	II	24	CD40	CD40 molecule, TNF receptor superfamily member 5 [Source:HGNC Symbol;Acc:11919]	ABI49511	ENSG00000101017	A_23_P57036
146	2.65934	II	4	CD40	CD40 molecule, TNF receptor superfamily member 5 [Source:HGNC Symbol;Acc:11919]	ABI49511	ENSG00000101017	A_23_P57036
147	4.13955	I	4	CD40	CD40 molecule, TNF receptor superfamily member 5 [Source:HGNC Symbol;Acc:11919]	ABI49511	ENSG00000101017	A_23_P57036
173	3.1383	II	20	CD40	CD40 molecule, TNF receptor superfamily member 5 [Source:HGNC Symbol;Acc:11919]	ABI49511	ENSG00000101017	A_23_P57036
293	7.56297	II	24	CD40	CD40 molecule, TNF receptor superfamily member 5 [Source:HGNC Symbol;Acc:11919]	ABI49511	ENSG00000101017	A_23_P57036
318	5.99426	II	6	CD40	CD40 molecule, TNF receptor superfamily member 5 [Source:HGNC Symbol;Acc:11919]	ABI49511	ENSG00000101017	A_23_P57036
319	3.24343	II	18	CD40	CD40 molecule, TNF receptor superfamily member 5 [Source:HGNC Symbol;Acc:11919]	ABI49511	ENSG00000101017	A_23_P57036
12	4.72023	II	24	CD40	CD40 molecule, TNF receptor superfamily member 5 [Source:HGNC Symbol;Acc:11919]	ABI49511	ENSG00000101017	205153_s_at
40	2.2034	I	5	CD40	CD40 molecule, TNF receptor superfamily member 5 [Source:HGNC Symbol;Acc:11919]	ABI49511	ENSG00000101017	205153_s_at
63	4.76821	II	6	CD40	CD40 molecule, TNF receptor superfamily member 5 [Source:HGNC Symbol;Acc:11919]	ABI49511	ENSG00000101017	205153_s_at
64	5.49586	II	24	CD40	CD40 molecule, TNF receptor superfamily member 5 [Source:HGNC Symbol;Acc:11919]	ABI49511	ENSG00000101017	205153_s_at
183	4.03372	II	24	CD40	CD40 molecule, TNF receptor superfamily member 5 [Source:HGNC Symbol;Acc:11919]	ABI49511	ENSG00000101017	205153_s_at
184	3.35354	II	24	CD40	CD40 molecule, TNF receptor superfamily member 5 [Source:HGNC Symbol;Acc:11919]	ABI49511	ENSG00000101017	205153_s_at
295	3.42625	II	24	CD40	CD40 molecule, TNF receptor superfamily member 5 [Source:HGNC Symbol;Acc:11919]	ABI49511	ENSG00000101017	205153_s_at
305	2.69786	II	1.5	CD40	CD40 molecule, TNF receptor superfamily member 5 [Source:HGNC Symbol;Acc:11919]	ABI49511	ENSG00000101017	205153_s_at
306	3.19308	I	1.5	CD40	CD40 molecule, TNF receptor superfamily member 5 [Source:HGNC Symbol;Acc:11919]	ABI49511	ENSG00000101017	205153_s_at
311	4.03478	II	24	CD40	CD40 molecule, TNF receptor superfamily member 5 [Source:HGNC Symbol;Acc:11919]	ABI49511	ENSG00000101017	205153_s_at
313	3.52755	II	72	CD40	CD40 molecule, TNF receptor superfamily member 5 [Source:HGNC Symbol;Acc:11919]	ABI49511	ENSG00000101017	205153_s_at
58	2.22636	I	3	CD40	CD40 molecule, TNF receptor superfamily member 5 [Source:HGNC Symbol;Acc:11919]	ABI49511	ENSG00000101017	35150_at
63	3.22901	II	6	CD40	CD40 molecule, TNF receptor superfamily member 5 [Source:HGNC Symbol;Acc:11919]	ABI49511	ENSG00000101017	35150_at
64	4.26535	II	24	CD40	CD40 molecule, TNF receptor superfamily member 5 [Source:HGNC Symbol;Acc:11919]	ABI49511	ENSG00000101017	35150_at
144	2.41961	II	24	CD40	CD40 molecule, TNF receptor superfamily member 5 [Source:HGNC Symbol;Acc:11919]	ABI49511	ENSG00000101017	35150_at
183	3.41647	II	24	CD40	CD40 molecule, TNF receptor superfamily member 5 [Source:HGNC Symbol;Acc:11919]	ABI49511	ENSG00000101017	35150_at
184	2.86541	II	24	CD40	CD40 molecule, TNF receptor superfamily member 5 [Source:HGNC Symbol;Acc:11919]	ABI49511	ENSG00000101017	35150_at
306	2.198	I	1.5	CD40	CD40 molecule, TNF receptor superfamily member 5 [Source:HGNC Symbol;Acc:11919]	ABI49511	ENSG00000101017	35150_at
311	4.02632	II	24	CD40	CD40 molecule, TNF receptor superfamily member 5 [Source:HGNC Symbol;Acc:11919]	ABI49511	ENSG00000101017	35150_at
313	3.5918	II	72	CD40	CD40 molecule, TNF receptor superfamily member 5 [Source:HGNC Symbol;Acc:11919]	ABI49511	ENSG00000101017	35150_at
12	5.02599	II	24	CD40	CD40 molecule, TNF receptor superfamily member 5 [Source:HGNC Symbol;Acc:11919]	ABI49511	ENSG00000101017	215346_at
63	4.23873	II	6	CD40	CD40 molecule, TNF receptor superfamily member 5 [Source:HGNC Symbol;Acc:11919]	ABI49511	ENSG00000101017	215346_at
64	5.08008	II	24	CD40	CD40 molecule, TNF receptor superfamily member 5 [Source:HGNC Symbol;Acc:11919]	ABI49511	ENSG00000101017	215346_at
183	3.64258	II	24	CD40	CD40 molecule, TNF receptor superfamily member 5 [Source:HGNC Symbol;Acc:11919]	ABI49511	ENSG00000101017	215346_at
184	2.88558	II	24	CD40	CD40 molecule, TNF receptor superfamily member 5 [Source:HGNC Symbol;Acc:11919]	ABI49511	ENSG00000101017	215346_at
295	2.97497	II	24	CD40	CD40 molecule, TNF receptor superfamily member 5 [Source:HGNC Symbol;Acc:11919]	ABI49511	ENSG00000101017	215346_at
305	2.63617	II	1.5	CD40	CD40 molecule, TNF receptor superfamily member 5 [Source:HGNC Symbol;Acc:11919]	ABI49511	ENSG00000101017	215346_at
306	2.95912	I	1.5	CD40	CD40 molecule, TNF receptor superfamily member 5 [Source:HGNC Symbol;Acc:11919]	ABI49511	ENSG00000101017	215346_at
311	3.56405	II	24	CD40	CD40 molecule, TNF receptor superfamily member 5 [Source:HGNC Symbol;Acc:11919]	ABI49511	ENSG00000101017	215346_at
313	3.34257	II	72	CD40	CD40 molecule, TNF receptor superfamily member 5 [Source:HGNC Symbol;Acc:11919]	ABI49511	ENSG00000101017	215346_at
63	2.28523	II	6	CD40	CD40 molecule, TNF receptor superfamily member 5 [Source:HGNC Symbol;Acc:11919]	ABI49511	ENSG00000101017	222292_at
64	2.54622	II	24	CD40	CD40 molecule, TNF receptor superfamily member 5 [Source:HGNC Symbol;Acc:11919]	ABI49511	ENSG00000101017	222292_at
299	2.25781	II	24	CD40	CD40 molecule, TNF receptor superfamily member 5 [Source:HGNC Symbol;Acc:11919]	ABI49511	ENSG00000101017	222292_at
305	3.53676	II	1.5	CD40	CD40 molecule, TNF receptor superfamily member 5 [Source:HGNC Symbol;Acc:11919]	ABI49511	ENSG00000101017	222292_at
306	4.18938	I	1.5	CD40	CD40 molecule, TNF receptor superfamily member 5 [Source:HGNC Symbol;Acc:11919]	ABI49511	ENSG00000101017	222292_at
313	2.13353	II	72	CD40	CD40 molecule, TNF receptor superfamily member 5 [Source:HGNC Symbol;Acc:11919]	ABI49511	ENSG00000101017	222292_at
58	3.67365	I	3	CD40	CD40 molecule, TNF receptor superfamily member 5 [Source:HGNC Symbol;Acc:11919]	ABI49511	ENSG00000101017	35149_at
128	2.08418	II	10	CD40	CD40 molecule, TNF receptor superfamily member 5 [Source:HGNC Symbol;Acc:11919]	ABI49511	ENSG00000101017	ILMN_2367818
322	2.5913	II	6	CD40	CD40 molecule, TNF receptor superfamily member 5 [Source:HGNC Symbol;Acc:11919]	ABI49511	ENSG00000101017	ILMN_2367818
128	6.17388	II	10	CD40	CD40 molecule, TNF receptor superfamily member 5 [Source:HGNC Symbol;Acc:11919]	ABI49511	ENSG00000101017	ILMN_1779257
131	5.57716	II	10	CD40	CD40 molecule, TNF receptor superfamily member 5 [Source:HGNC Symbol;Acc:11919]	ABI49511	ENSG00000101017	ILMN_1779257
322	3.2927	II	6	CD40	CD40 molecule, TNF receptor superfamily member 5 [Source:HGNC Symbol;Acc:11919]	ABI49511	ENSG00000101017	ILMN_1779257
87	3.02713	II	12	CD40	CD40 molecule, TNF receptor superfamily member 5 [Source:HGNC Symbol;Acc:11919]	ABI49511	ENSG00000101017	8063156
88	2.09553	II	24	CD40	CD40 molecule, TNF receptor superfamily member 5 [Source:HGNC Symbol;Acc:11919]	ABI49511	ENSG00000101017	8063156
301	2.23599	I	6	CD40	CD40 molecule, TNF receptor superfamily member 5 [Source:HGNC Symbol;Acc:11919]	ABI49511	ENSG00000101017	8063156
293	3.178	II	24	CD46	CD46 molecule, complement regulatory protein [Source:HGNC Symbol;Acc:6953]		ENSG00000117335	A_23_P35230
85	2.14628	II	48	CD46	CD46 molecule, complement regulatory protein [Source:HGNC Symbol;Acc:6953]		ENSG00000117335	ILMN_2307740
317	2.1103	II	18	CD86	CD86 molecule [Source:HGNC Symbol;Acc:1705]		ENSG00000114013	A_24_P131589
319	2.65356	II	18	CD86	CD86 molecule [Source:HGNC Symbol;Acc:1705]		ENSG00000114013	A_24_P131589
317	3.27368	II	18	CD86	CD86 molecule [Source:HGNC Symbol;Acc:1705]		ENSG00000114013	A_23_P109988
318	2.92747	II	6	CD86	CD86 molecule [Source:HGNC Symbol;Acc:1705]		ENSG00000114013	A_23_P109988
187	2.08276	I	96	CD86	CD86 molecule [Source:HGNC Symbol;Acc:1705]		ENSG00000114013	205686_s_at
63	2.29689	II	6	CD86	CD86 molecule [Source:HGNC Symbol;Acc:1705]		ENSG00000114013	210895_s_at
32	2.12497	I	3	CD86	CD86 molecule [Source:HGNC Symbol;Acc:1705]		ENSG00000114013	36270_at
163	2.10708	I	3	CD86	CD86 molecule [Source:HGNC Symbol;Acc:1705]		ENSG00000114013	ILMN_1714602
324	2.45371	II	72	CD86	CD86 molecule [Source:HGNC Symbol;Acc:1705]		ENSG00000114013	ILMN_1714602
312	3.78036	II	144	CFD	complement factor D (adipsin) [Source:HGNC Symbol;Acc:2771]		ENSG00000197766	205382_s_at
74	2.17317	I	16	CFD	complement factor D (adipsin) [Source:HGNC Symbol;Acc:2771]		ENSG00000197766	ILMN_1777190
160	2.93031	I	18	CFD	complement factor D (adipsin) [Source:HGNC Symbol;Acc:2771]		ENSG00000197766	ILMN_1777190
314	5.64119	II	24	CX3CR1	chemokine (C-X3-C motif) receptor 1 [Source:HGNC Symbol;Acc:2558]		ENSG00000168329	205898_at
319	2.10339	II	18	CYBB	cytochrome b-245, beta polypeptide [Source:HGNC Symbol;Acc:2578]		ENSG00000165168	A_23_P217258
293	2.04671	II	24	CYBB	cytochrome b-245, beta polypeptide [Source:HGNC Symbol;Acc:2578]		ENSG00000165168	A_24_P365767
64	2.80631	II	24	CYBB	cytochrome b-245, beta polypeptide [Source:HGNC Symbol;Acc:2578]		ENSG00000165168	203922_s_at
185	2.44398	I	16	CYBB	cytochrome b-245, beta polypeptide [Source:HGNC Symbol;Acc:2578]		ENSG00000165168	203922_s_at
313	2.00392	II	72	CYBB	cytochrome b-245, beta polypeptide [Source:HGNC Symbol;Acc:2578]		ENSG00000165168	203922_s_at
313	2.17485	II	72	CYBB	cytochrome b-245, beta polypeptide [Source:HGNC Symbol;Acc:2578]		ENSG00000165168	217431_x_at
146	2.56461	II	4	CYLD	cylindromatosis (turban tumor syndrome) [Source:HGNC Symbol;Acc:2584]	CAB93533	ENSG00000083799	A_24_P48078
147	2.54044	I	4	CYLD	cylindromatosis (turban tumor syndrome) [Source:HGNC Symbol;Acc:2584]	CAB93533	ENSG00000083799	A_24_P48078
318	3.29348	II	6	CYLD	cylindromatosis (turban tumor syndrome) [Source:HGNC Symbol;Acc:2584]	CAB93533	ENSG00000083799	A_24_P48078
319	2.11139	II	18	CYLD	cylindromatosis (turban tumor syndrome) [Source:HGNC Symbol;Acc:2584]	CAB93533	ENSG00000083799	A_24_P48078
319	2.41315	II	18	CYLD	cylindromatosis (turban tumor syndrome) [Source:HGNC Symbol;Acc:2584]	CAB93533	ENSG00000083799	A_23_P65996
40	2.07871	I	5	CYLD	cylindromatosis (turban tumor syndrome) [Source:HGNC Symbol;Acc:2584]	CAB93533	ENSG00000083799	221903_s_at
63	3.7229	II	6	CYLD	cylindromatosis (turban tumor syndrome) [Source:HGNC Symbol;Acc:2584]	CAB93533	ENSG00000083799	221903_s_at
64	3.26333	II	24	CYLD	cylindromatosis (turban tumor syndrome) [Source:HGNC Symbol;Acc:2584]	CAB93533	ENSG00000083799	221903_s_at
144	3.35548	II	24	CYLD	cylindromatosis (turban tumor syndrome) [Source:HGNC Symbol;Acc:2584]	CAB93533	ENSG00000083799	221903_s_at
182	2.58238	II	8	CYLD	cylindromatosis (turban tumor syndrome) [Source:HGNC Symbol;Acc:2584]	CAB93533	ENSG00000083799	221903_s_at
183	2.35694	II	24	CYLD	cylindromatosis (turban tumor syndrome) [Source:HGNC Symbol;Acc:2584]	CAB93533	ENSG00000083799	221903_s_at
184	2.05615	II	24	CYLD	cylindromatosis (turban tumor syndrome) [Source:HGNC Symbol;Acc:2584]	CAB93533	ENSG00000083799	221903_s_at
295	2.63437	II	24	CYLD	cylindromatosis (turban tumor syndrome) [Source:HGNC Symbol;Acc:2584]	CAB93533	ENSG00000083799	221903_s_at
298	2.00701	II	24	CYLD	cylindromatosis (turban tumor syndrome) [Source:HGNC Symbol;Acc:2584]	CAB93533	ENSG00000083799	221903_s_at
311	2.06008	II	24	CYLD	cylindromatosis (turban tumor syndrome) [Source:HGNC Symbol;Acc:2584]	CAB93533	ENSG00000083799	221903_s_at
12	5.71879	II	24	CYLD	cylindromatosis (turban tumor syndrome) [Source:HGNC Symbol;Acc:2584]	CAB93533	ENSG00000083799	222142_at
63	2.05181	II	6	CYLD	cylindromatosis (turban tumor syndrome) [Source:HGNC Symbol;Acc:2584]	CAB93533	ENSG00000083799	222142_at
305	2.22115	II	1.5	CYLD	cylindromatosis (turban tumor syndrome) [Source:HGNC Symbol;Acc:2584]	CAB93533	ENSG00000083799	222142_at
305	2.44822	II	1.5	CYLD	cylindromatosis (turban tumor syndrome) [Source:HGNC Symbol;Acc:2584]	CAB93533	ENSG00000083799	60084_at
306	2.52074	I	1.5	CYLD	cylindromatosis (turban tumor syndrome) [Source:HGNC Symbol;Acc:2584]	CAB93533	ENSG00000083799	60084_at
63	2.68548	II	6	CYLD	cylindromatosis (turban tumor syndrome) [Source:HGNC Symbol;Acc:2584]	CAB93533	ENSG00000083799	221905_at
63	2.05976	II	6	CYLD	cylindromatosis (turban tumor syndrome) [Source:HGNC Symbol;Acc:2584]	CAB93533	ENSG00000083799	214272_at
12	2.09759	II	24	CYLD	cylindromatosis (turban tumor syndrome) [Source:HGNC Symbol;Acc:2584]	CAB93533	ENSG00000083799	39582_at
307	2.14685	II	48	CYLD	cylindromatosis (turban tumor syndrome) [Source:HGNC Symbol;Acc:2584]	CAB93533	ENSG00000083799	7995552
53	5.39045	III	6	DDX58	DEAD (Asp-Glu-Ala-Asp) box polypeptide 58 [Source:HGNC Symbol;Acc:19102]	BAG54273	ENSG00000107201	A_23_P20814
59	5.02719	III	6	DDX58	DEAD (Asp-Glu-Ala-Asp) box polypeptide 58 [Source:HGNC Symbol;Acc:19102]	BAG54273	ENSG00000107201	A_23_P20814
146	6.31596	II	4	DDX58	DEAD (Asp-Glu-Ala-Asp) box polypeptide 58 [Source:HGNC Symbol;Acc:19102]	BAG54273	ENSG00000107201	A_23_P20814
147	71.6056	I	4	DDX58	DEAD (Asp-Glu-Ala-Asp) box polypeptide 58 [Source:HGNC Symbol;Acc:19102]	BAG54273	ENSG00000107201	A_23_P20814
148	8.31576	I	6	DDX58	DEAD (Asp-Glu-Ala-Asp) box polypeptide 58 [Source:HGNC Symbol;Acc:19102]	BAG54273	ENSG00000107201	A_23_P20814
149	27.2115	I	24	DDX58	DEAD (Asp-Glu-Ala-Asp) box polypeptide 58 [Source:HGNC Symbol;Acc:19102]	BAG54273	ENSG00000107201	A_23_P20814
318	3.52813	II	6	DDX58	DEAD (Asp-Glu-Ala-Asp) box polypeptide 58 [Source:HGNC Symbol;Acc:19102]	BAG54273	ENSG00000107201	A_23_P20814
319	3.28737	II	18	DDX58	DEAD (Asp-Glu-Ala-Asp) box polypeptide 58 [Source:HGNC Symbol;Acc:19102]	BAG54273	ENSG00000107201	A_23_P20814
43	2.1197	I	12	DDX58	DEAD (Asp-Glu-Ala-Asp) box polypeptide 58 [Source:HGNC Symbol;Acc:19102]	BAG54273	ENSG00000107201	242961_x_at
44	6.62758	I	6	DDX58	DEAD (Asp-Glu-Ala-Asp) box polypeptide 58 [Source:HGNC Symbol;Acc:19102]	BAG54273	ENSG00000107201	242961_x_at
46	3.4676	I	6	DDX58	DEAD (Asp-Glu-Ala-Asp) box polypeptide 58 [Source:HGNC Symbol;Acc:19102]	BAG54273	ENSG00000107201	242961_x_at
47	13.8504	I	5	DDX58	DEAD (Asp-Glu-Ala-Asp) box polypeptide 58 [Source:HGNC Symbol;Acc:19102]	BAG54273	ENSG00000107201	242961_x_at
48	9.34925	I	5	DDX58	DEAD (Asp-Glu-Ala-Asp) box polypeptide 58 [Source:HGNC Symbol;Acc:19102]	BAG54273	ENSG00000107201	242961_x_at
60	7.96253	I	24	DDX58	DEAD (Asp-Glu-Ala-Asp) box polypeptide 58 [Source:HGNC Symbol;Acc:19102]	BAG54273	ENSG00000107201	242961_x_at
67	3.89187	I	6	DDX58	DEAD (Asp-Glu-Ala-Asp) box polypeptide 58 [Source:HGNC Symbol;Acc:19102]	BAG54273	ENSG00000107201	242961_x_at
300	3.27079	I	6	DDX58	DEAD (Asp-Glu-Ala-Asp) box polypeptide 58 [Source:HGNC Symbol;Acc:19102]	BAG54273	ENSG00000107201	242961_x_at
306	10.4487	I	1.5	DDX58	DEAD (Asp-Glu-Ala-Asp) box polypeptide 58 [Source:HGNC Symbol;Acc:19102]	BAG54273	ENSG00000107201	242961_x_at
311	2.47362	II	24	DDX58	DEAD (Asp-Glu-Ala-Asp) box polypeptide 58 [Source:HGNC Symbol;Acc:19102]	BAG54273	ENSG00000107201	242961_x_at
313	2.32621	II	72	DDX58	DEAD (Asp-Glu-Ala-Asp) box polypeptide 58 [Source:HGNC Symbol;Acc:19102]	BAG54273	ENSG00000107201	242961_x_at
43	7.10541	I	12	DDX58	DEAD (Asp-Glu-Ala-Asp) box polypeptide 58 [Source:HGNC Symbol;Acc:19102]	BAG54273	ENSG00000107201	222793_at
44	51.2304	I	6	DDX58	DEAD (Asp-Glu-Ala-Asp) box polypeptide 58 [Source:HGNC Symbol;Acc:19102]	BAG54273	ENSG00000107201	222793_at
46	18.1346	I	6	DDX58	DEAD (Asp-Glu-Ala-Asp) box polypeptide 58 [Source:HGNC Symbol;Acc:19102]	BAG54273	ENSG00000107201	222793_at
47	23.3036	I	5	DDX58	DEAD (Asp-Glu-Ala-Asp) box polypeptide 58 [Source:HGNC Symbol;Acc:19102]	BAG54273	ENSG00000107201	222793_at
48	13.2669	I	5	DDX58	DEAD (Asp-Glu-Ala-Asp) box polypeptide 58 [Source:HGNC Symbol;Acc:19102]	BAG54273	ENSG00000107201	222793_at
60	16.656	I	24	DDX58	DEAD (Asp-Glu-Ala-Asp) box polypeptide 58 [Source:HGNC Symbol;Acc:19102]	BAG54273	ENSG00000107201	222793_at
67	5.21906	I	6	DDX58	DEAD (Asp-Glu-Ala-Asp) box polypeptide 58 [Source:HGNC Symbol;Acc:19102]	BAG54273	ENSG00000107201	222793_at
144	9.65067	II	24	DDX58	DEAD (Asp-Glu-Ala-Asp) box polypeptide 58 [Source:HGNC Symbol;Acc:19102]	BAG54273	ENSG00000107201	222793_at
183	2.11543	II	24	DDX58	DEAD (Asp-Glu-Ala-Asp) box polypeptide 58 [Source:HGNC Symbol;Acc:19102]	BAG54273	ENSG00000107201	222793_at
184	2.03225	II	24	DDX58	DEAD (Asp-Glu-Ala-Asp) box polypeptide 58 [Source:HGNC Symbol;Acc:19102]	BAG54273	ENSG00000107201	222793_at
185	4.92576	I	16	DDX58	DEAD (Asp-Glu-Ala-Asp) box polypeptide 58 [Source:HGNC Symbol;Acc:19102]	BAG54273	ENSG00000107201	222793_at
187	3.18667	I	96	DDX58	DEAD (Asp-Glu-Ala-Asp) box polypeptide 58 [Source:HGNC Symbol;Acc:19102]	BAG54273	ENSG00000107201	222793_at
300	6.16787	I	6	DDX58	DEAD (Asp-Glu-Ala-Asp) box polypeptide 58 [Source:HGNC Symbol;Acc:19102]	BAG54273	ENSG00000107201	222793_at
305	7.51476	II	1.5	DDX58	DEAD (Asp-Glu-Ala-Asp) box polypeptide 58 [Source:HGNC Symbol;Acc:19102]	BAG54273	ENSG00000107201	222793_at
306	17.6402	I	1.5	DDX58	DEAD (Asp-Glu-Ala-Asp) box polypeptide 58 [Source:HGNC Symbol;Acc:19102]	BAG54273	ENSG00000107201	222793_at
311	2.6675	II	24	DDX58	DEAD (Asp-Glu-Ala-Asp) box polypeptide 58 [Source:HGNC Symbol;Acc:19102]	BAG54273	ENSG00000107201	222793_at
12	6.8602	II	24	DDX58	DEAD (Asp-Glu-Ala-Asp) box polypeptide 58 [Source:HGNC Symbol;Acc:19102]	BAG54273	ENSG00000107201	218943_s_at
13	5.32389	II	6	DDX58	DEAD (Asp-Glu-Ala-Asp) box polypeptide 58 [Source:HGNC Symbol;Acc:19102]	BAG54273	ENSG00000107201	218943_s_at
14	14.4035	I	24	DDX58	DEAD (Asp-Glu-Ala-Asp) box polypeptide 58 [Source:HGNC Symbol;Acc:19102]	BAG54273	ENSG00000107201	218943_s_at
15	32.7951	I	6	DDX58	DEAD (Asp-Glu-Ala-Asp) box polypeptide 58 [Source:HGNC Symbol;Acc:19102]	BAG54273	ENSG00000107201	218943_s_at
20	4.31457	I	72	DDX58	DEAD (Asp-Glu-Ala-Asp) box polypeptide 58 [Source:HGNC Symbol;Acc:19102]	BAG54273	ENSG00000107201	218943_s_at
21	54.3195	I	18	DDX58	DEAD (Asp-Glu-Ala-Asp) box polypeptide 58 [Source:HGNC Symbol;Acc:19102]	BAG54273	ENSG00000107201	218943_s_at
22	73.0514	I	12	DDX58	DEAD (Asp-Glu-Ala-Asp) box polypeptide 58 [Source:HGNC Symbol;Acc:19102]	BAG54273	ENSG00000107201	218943_s_at
23	66.6847	I	8	DDX58	DEAD (Asp-Glu-Ala-Asp) box polypeptide 58 [Source:HGNC Symbol;Acc:19102]	BAG54273	ENSG00000107201	218943_s_at
24	58.4372	I	6	DDX58	DEAD (Asp-Glu-Ala-Asp) box polypeptide 58 [Source:HGNC Symbol;Acc:19102]	BAG54273	ENSG00000107201	218943_s_at
25	48.7983	I	4	DDX58	DEAD (Asp-Glu-Ala-Asp) box polypeptide 58 [Source:HGNC Symbol;Acc:19102]	BAG54273	ENSG00000107201	218943_s_at
26	7.29254	I	2	DDX58	DEAD (Asp-Glu-Ala-Asp) box polypeptide 58 [Source:HGNC Symbol;Acc:19102]	BAG54273	ENSG00000107201	218943_s_at
37	15.0347	II	5	DDX58	DEAD (Asp-Glu-Ala-Asp) box polypeptide 58 [Source:HGNC Symbol;Acc:19102]	BAG54273	ENSG00000107201	218943_s_at
38	57.6659	I	5	DDX58	DEAD (Asp-Glu-Ala-Asp) box polypeptide 58 [Source:HGNC Symbol;Acc:19102]	BAG54273	ENSG00000107201	218943_s_at
39	4.88028	II	5	DDX58	DEAD (Asp-Glu-Ala-Asp) box polypeptide 58 [Source:HGNC Symbol;Acc:19102]	BAG54273	ENSG00000107201	218943_s_at
40	51.8778	I	5	DDX58	DEAD (Asp-Glu-Ala-Asp) box polypeptide 58 [Source:HGNC Symbol;Acc:19102]	BAG54273	ENSG00000107201	218943_s_at
41	50.6459	I	5	DDX58	DEAD (Asp-Glu-Ala-Asp) box polypeptide 58 [Source:HGNC Symbol;Acc:19102]	BAG54273	ENSG00000107201	218943_s_at
43	6.35543	I	12	DDX58	DEAD (Asp-Glu-Ala-Asp) box polypeptide 58 [Source:HGNC Symbol;Acc:19102]	BAG54273	ENSG00000107201	218943_s_at
44	44.1705	I	6	DDX58	DEAD (Asp-Glu-Ala-Asp) box polypeptide 58 [Source:HGNC Symbol;Acc:19102]	BAG54273	ENSG00000107201	218943_s_at
46	18.6151	I	6	DDX58	DEAD (Asp-Glu-Ala-Asp) box polypeptide 58 [Source:HGNC Symbol;Acc:19102]	BAG54273	ENSG00000107201	218943_s_at
47	12.598	I	5	DDX58	DEAD (Asp-Glu-Ala-Asp) box polypeptide 58 [Source:HGNC Symbol;Acc:19102]	BAG54273	ENSG00000107201	218943_s_at
48	9.61388	I	5	DDX58	DEAD (Asp-Glu-Ala-Asp) box polypeptide 58 [Source:HGNC Symbol;Acc:19102]	BAG54273	ENSG00000107201	218943_s_at
60	21.7918	I	24	DDX58	DEAD (Asp-Glu-Ala-Asp) box polypeptide 58 [Source:HGNC Symbol;Acc:19102]	BAG54273	ENSG00000107201	218943_s_at
61	8.81782	I	72	DDX58	DEAD (Asp-Glu-Ala-Asp) box polypeptide 58 [Source:HGNC Symbol;Acc:19102]	BAG54273	ENSG00000107201	218943_s_at
63	2.51424	II	6	DDX58	DEAD (Asp-Glu-Ala-Asp) box polypeptide 58 [Source:HGNC Symbol;Acc:19102]	BAG54273	ENSG00000107201	218943_s_at
67	5.41457	I	6	DDX58	DEAD (Asp-Glu-Ala-Asp) box polypeptide 58 [Source:HGNC Symbol;Acc:19102]	BAG54273	ENSG00000107201	218943_s_at
150	2.20558	I	24	DDX58	DEAD (Asp-Glu-Ala-Asp) box polypeptide 58 [Source:HGNC Symbol;Acc:19102]	BAG54273	ENSG00000107201	218943_s_at
177	7.14913	I	48	DDX58	DEAD (Asp-Glu-Ala-Asp) box polypeptide 58 [Source:HGNC Symbol;Acc:19102]	BAG54273	ENSG00000107201	218943_s_at
178	5.3617	I	48	DDX58	DEAD (Asp-Glu-Ala-Asp) box polypeptide 58 [Source:HGNC Symbol;Acc:19102]	BAG54273	ENSG00000107201	218943_s_at
179	5.21713	I	48	DDX58	DEAD (Asp-Glu-Ala-Asp) box polypeptide 58 [Source:HGNC Symbol;Acc:19102]	BAG54273	ENSG00000107201	218943_s_at
183	3.63247	II	24	DDX58	DEAD (Asp-Glu-Ala-Asp) box polypeptide 58 [Source:HGNC Symbol;Acc:19102]	BAG54273	ENSG00000107201	218943_s_at
184	3.04594	II	24	DDX58	DEAD (Asp-Glu-Ala-Asp) box polypeptide 58 [Source:HGNC Symbol;Acc:19102]	BAG54273	ENSG00000107201	218943_s_at
185	5.57434	I	16	DDX58	DEAD (Asp-Glu-Ala-Asp) box polypeptide 58 [Source:HGNC Symbol;Acc:19102]	BAG54273	ENSG00000107201	218943_s_at
186	2.38497	I	48	DDX58	DEAD (Asp-Glu-Ala-Asp) box polypeptide 58 [Source:HGNC Symbol;Acc:19102]	BAG54273	ENSG00000107201	218943_s_at
295	6.57089	II	24	DDX58	DEAD (Asp-Glu-Ala-Asp) box polypeptide 58 [Source:HGNC Symbol;Acc:19102]	BAG54273	ENSG00000107201	218943_s_at
300	6.42916	I	6	DDX58	DEAD (Asp-Glu-Ala-Asp) box polypeptide 58 [Source:HGNC Symbol;Acc:19102]	BAG54273	ENSG00000107201	218943_s_at
305	13.193	II	1.5	DDX58	DEAD (Asp-Glu-Ala-Asp) box polypeptide 58 [Source:HGNC Symbol;Acc:19102]	BAG54273	ENSG00000107201	218943_s_at
306	30.803	I	1.5	DDX58	DEAD (Asp-Glu-Ala-Asp) box polypeptide 58 [Source:HGNC Symbol;Acc:19102]	BAG54273	ENSG00000107201	218943_s_at
311	2.92715	II	24	DDX58	DEAD (Asp-Glu-Ala-Asp) box polypeptide 58 [Source:HGNC Symbol;Acc:19102]	BAG54273	ENSG00000107201	218943_s_at
313	2.10161	II	72	DDX58	DEAD (Asp-Glu-Ala-Asp) box polypeptide 58 [Source:HGNC Symbol;Acc:19102]	BAG54273	ENSG00000107201	218943_s_at
74	4.48676	I	16	DDX58	DEAD (Asp-Glu-Ala-Asp) box polypeptide 58 [Source:HGNC Symbol;Acc:19102]	BAG54273	ENSG00000107201	ILMN_1797001
75	7.1029	I	16	DDX58	DEAD (Asp-Glu-Ala-Asp) box polypeptide 58 [Source:HGNC Symbol;Acc:19102]	BAG54273	ENSG00000107201	ILMN_1797001
78	6.61923	I	12	DDX58	DEAD (Asp-Glu-Ala-Asp) box polypeptide 58 [Source:HGNC Symbol;Acc:19102]	BAG54273	ENSG00000107201	ILMN_1797001
79	6.66739	I	24	DDX58	DEAD (Asp-Glu-Ala-Asp) box polypeptide 58 [Source:HGNC Symbol;Acc:19102]	BAG54273	ENSG00000107201	ILMN_1797001
80	3.95134	I	48	DDX58	DEAD (Asp-Glu-Ala-Asp) box polypeptide 58 [Source:HGNC Symbol;Acc:19102]	BAG54273	ENSG00000107201	ILMN_1797001
81	4.2605	I	4	DDX58	DEAD (Asp-Glu-Ala-Asp) box polypeptide 58 [Source:HGNC Symbol;Acc:19102]	BAG54273	ENSG00000107201	ILMN_1797001
82	2.16063	II	12	DDX58	DEAD (Asp-Glu-Ala-Asp) box polypeptide 58 [Source:HGNC Symbol;Acc:19102]	BAG54273	ENSG00000107201	ILMN_1797001
83	2.19541	II	24	DDX58	DEAD (Asp-Glu-Ala-Asp) box polypeptide 58 [Source:HGNC Symbol;Acc:19102]	BAG54273	ENSG00000107201	ILMN_1797001
85	2.12588	II	48	DDX58	DEAD (Asp-Glu-Ala-Asp) box polypeptide 58 [Source:HGNC Symbol;Acc:19102]	BAG54273	ENSG00000107201	ILMN_1797001
128	5.24008	II	10	DDX58	DEAD (Asp-Glu-Ala-Asp) box polypeptide 58 [Source:HGNC Symbol;Acc:19102]	BAG54273	ENSG00000107201	ILMN_1797001
129	38.2631	I	10	DDX58	DEAD (Asp-Glu-Ala-Asp) box polypeptide 58 [Source:HGNC Symbol;Acc:19102]	BAG54273	ENSG00000107201	ILMN_1797001
130	27.5052	I	10	DDX58	DEAD (Asp-Glu-Ala-Asp) box polypeptide 58 [Source:HGNC Symbol;Acc:19102]	BAG54273	ENSG00000107201	ILMN_1797001
131	4.41942	II	10	DDX58	DEAD (Asp-Glu-Ala-Asp) box polypeptide 58 [Source:HGNC Symbol;Acc:19102]	BAG54273	ENSG00000107201	ILMN_1797001
160	6.47453	I	18	DDX58	DEAD (Asp-Glu-Ala-Asp) box polypeptide 58 [Source:HGNC Symbol;Acc:19102]	BAG54273	ENSG00000107201	ILMN_1797001
161	8.73659	I	6	DDX58	DEAD (Asp-Glu-Ala-Asp) box polypeptide 58 [Source:HGNC Symbol;Acc:19102]	BAG54273	ENSG00000107201	ILMN_1797001
162	2.46798	II	6	DDX58	DEAD (Asp-Glu-Ala-Asp) box polypeptide 58 [Source:HGNC Symbol;Acc:19102]	BAG54273	ENSG00000107201	ILMN_1797001
163	9.39984	I	3	DDX58	DEAD (Asp-Glu-Ala-Asp) box polypeptide 58 [Source:HGNC Symbol;Acc:19102]	BAG54273	ENSG00000107201	ILMN_1797001
200	2.44314	I	10	DDX58	DEAD (Asp-Glu-Ala-Asp) box polypeptide 58 [Source:HGNC Symbol;Acc:19102]	BAG54273	ENSG00000107201	ILMN_1797001
249	5.51279	I	12	DDX58	DEAD (Asp-Glu-Ala-Asp) box polypeptide 58 [Source:HGNC Symbol;Acc:19102]	BAG54273	ENSG00000107201	ILMN_1797001
251	4.80972	I	24	DDX58	DEAD (Asp-Glu-Ala-Asp) box polypeptide 58 [Source:HGNC Symbol;Acc:19102]	BAG54273	ENSG00000107201	ILMN_1797001
253	4.2914	I	4	DDX58	DEAD (Asp-Glu-Ala-Asp) box polypeptide 58 [Source:HGNC Symbol;Acc:19102]	BAG54273	ENSG00000107201	ILMN_1797001
254	5.14275	I	6	DDX58	DEAD (Asp-Glu-Ala-Asp) box polypeptide 58 [Source:HGNC Symbol;Acc:19102]	BAG54273	ENSG00000107201	ILMN_1797001
257	2.08455	III	12	DDX58	DEAD (Asp-Glu-Ala-Asp) box polypeptide 58 [Source:HGNC Symbol;Acc:19102]	BAG54273	ENSG00000107201	ILMN_1797001
261	2.05495	III	6	DDX58	DEAD (Asp-Glu-Ala-Asp) box polypeptide 58 [Source:HGNC Symbol;Acc:19102]	BAG54273	ENSG00000107201	ILMN_1797001
275	29.4064	I	8	DDX58	DEAD (Asp-Glu-Ala-Asp) box polypeptide 58 [Source:HGNC Symbol;Acc:19102]	BAG54273	ENSG00000107201	ILMN_1797001
276	14.7261	I	2	DDX58	DEAD (Asp-Glu-Ala-Asp) box polypeptide 58 [Source:HGNC Symbol;Acc:19102]	BAG54273	ENSG00000107201	ILMN_1797001
277	23.5104	I	8	DDX58	DEAD (Asp-Glu-Ala-Asp) box polypeptide 58 [Source:HGNC Symbol;Acc:19102]	BAG54273	ENSG00000107201	ILMN_1797001
278	10.1722	I	2	DDX58	DEAD (Asp-Glu-Ala-Asp) box polypeptide 58 [Source:HGNC Symbol;Acc:19102]	BAG54273	ENSG00000107201	ILMN_1797001
279	13.5394	I	48	DDX58	DEAD (Asp-Glu-Ala-Asp) box polypeptide 58 [Source:HGNC Symbol;Acc:19102]	BAG54273	ENSG00000107201	ILMN_1797001
280	6.5805	I	48	DDX58	DEAD (Asp-Glu-Ala-Asp) box polypeptide 58 [Source:HGNC Symbol;Acc:19102]	BAG54273	ENSG00000107201	ILMN_1797001
281	13.2472	I	48	DDX58	DEAD (Asp-Glu-Ala-Asp) box polypeptide 58 [Source:HGNC Symbol;Acc:19102]	BAG54273	ENSG00000107201	ILMN_1797001
347	4.41816	I	6	DDX58	DEAD (Asp-Glu-Ala-Asp) box polypeptide 58 [Source:HGNC Symbol;Acc:19102]	BAG54273	ENSG00000107201	ILMN_1797001
348	3.74755	I	4	DDX58	DEAD (Asp-Glu-Ala-Asp) box polypeptide 58 [Source:HGNC Symbol;Acc:19102]	BAG54273	ENSG00000107201	ILMN_1797001
352	2.47066	I	12	DDX58	DEAD (Asp-Glu-Ala-Asp) box polypeptide 58 [Source:HGNC Symbol;Acc:19102]	BAG54273	ENSG00000107201	ILMN_1797001
360	2.78794	I	3	DDX58	DEAD (Asp-Glu-Ala-Asp) box polypeptide 58 [Source:HGNC Symbol;Acc:19102]	BAG54273	ENSG00000107201	ILMN_1797001
362	2.60082	I	6	DDX58	DEAD (Asp-Glu-Ala-Asp) box polypeptide 58 [Source:HGNC Symbol;Acc:19102]	BAG54273	ENSG00000107201	ILMN_1797001
373	5.71903	I	24	DDX58	DEAD (Asp-Glu-Ala-Asp) box polypeptide 58 [Source:HGNC Symbol;Acc:19102]	BAG54273	ENSG00000107201	ILMN_1797001
374	6.32693	I	6	DDX58	DEAD (Asp-Glu-Ala-Asp) box polypeptide 58 [Source:HGNC Symbol;Acc:19102]	BAG54273	ENSG00000107201	ILMN_1797001
375	7.32286	I	6	DDX58	DEAD (Asp-Glu-Ala-Asp) box polypeptide 58 [Source:HGNC Symbol;Acc:19102]	BAG54273	ENSG00000107201	ILMN_1797001
376	3.83944	I	24	DDX58	DEAD (Asp-Glu-Ala-Asp) box polypeptide 58 [Source:HGNC Symbol;Acc:19102]	BAG54273	ENSG00000107201	ILMN_1797001
88	6.89917	II	24	DDX58	DEAD (Asp-Glu-Ala-Asp) box polypeptide 58 [Source:HGNC Symbol;Acc:19102]	BAG54273	ENSG00000107201	8160559
119	2.82913	I	120	DDX58	DEAD (Asp-Glu-Ala-Asp) box polypeptide 58 [Source:HGNC Symbol;Acc:19102]	BAG54273	ENSG00000107201	8160559
120	2.71705	I	120	DDX58	DEAD (Asp-Glu-Ala-Asp) box polypeptide 58 [Source:HGNC Symbol;Acc:19102]	BAG54273	ENSG00000107201	8160559
142	9.42327	I	6	DDX58	DEAD (Asp-Glu-Ala-Asp) box polypeptide 58 [Source:HGNC Symbol;Acc:19102]	BAG54273	ENSG00000107201	8160559
143	22.5257	I	6	DDX58	DEAD (Asp-Glu-Ala-Asp) box polypeptide 58 [Source:HGNC Symbol;Acc:19102]	BAG54273	ENSG00000107201	8160559
201	9.06057	I	2	DDX58	DEAD (Asp-Glu-Ala-Asp) box polypeptide 58 [Source:HGNC Symbol;Acc:19102]	BAG54273	ENSG00000107201	8160559
202	4.01175	I	6	DDX58	DEAD (Asp-Glu-Ala-Asp) box polypeptide 58 [Source:HGNC Symbol;Acc:19102]	BAG54273	ENSG00000107201	8160559
203	2.8196	I	18	DDX58	DEAD (Asp-Glu-Ala-Asp) box polypeptide 58 [Source:HGNC Symbol;Acc:19102]	BAG54273	ENSG00000107201	8160559
301	4.24087	I	6	DDX58	DEAD (Asp-Glu-Ala-Asp) box polypeptide 58 [Source:HGNC Symbol;Acc:19102]	BAG54273	ENSG00000107201	8160559
303	6.96327	I	24	DDX58	DEAD (Asp-Glu-Ala-Asp) box polypeptide 58 [Source:HGNC Symbol;Acc:19102]	BAG54273	ENSG00000107201	8160559
307	5.21843	II	48	DDX58	DEAD (Asp-Glu-Ala-Asp) box polypeptide 58 [Source:HGNC Symbol;Acc:19102]	BAG54273	ENSG00000107201	8160559
308	9.23074	II	48	DDX58	DEAD (Asp-Glu-Ala-Asp) box polypeptide 58 [Source:HGNC Symbol;Acc:19102]	BAG54273	ENSG00000107201	8160559
125	20.6879	I	3	DEFB1	defensin, beta 1 [Source:HGNC Symbol;Acc:2766]	AAC51728	ENSG00000164825	A_23_P71480
147	2.96923	I	4	DEFB1	defensin, beta 1 [Source:HGNC Symbol;Acc:2766]	AAC51728	ENSG00000164825	A_23_P71480
319	7.82971	II	18	DEFB1	defensin, beta 1 [Source:HGNC Symbol;Acc:2766]	AAC51728	ENSG00000164825	A_23_P71480
150	2.01507	I	24	DEFB1	defensin, beta 1 [Source:HGNC Symbol;Acc:2766]	AAC51728	ENSG00000164825	210397_at
295	2.68042	II	24	DEFB1	defensin, beta 1 [Source:HGNC Symbol;Acc:2766]	AAC51728	ENSG00000164825	210397_at
305	17.4725	II	1.5	DEFB1	defensin, beta 1 [Source:HGNC Symbol;Acc:2766]	AAC51728	ENSG00000164825	210397_at
306	36.4034	I	1.5	DEFB1	defensin, beta 1 [Source:HGNC Symbol;Acc:2766]	AAC51728	ENSG00000164825	210397_at
314	3.70902	II	24	DEFB1	defensin, beta 1 [Source:HGNC Symbol;Acc:2766]	AAC51728	ENSG00000164825	210397_at
58	5.02343	I	3	DEFB1	defensin, beta 1 [Source:HGNC Symbol;Acc:2766]	AAC51728	ENSG00000164825	39660_at
74	33.2114	I	16	DEFB1	defensin, beta 1 [Source:HGNC Symbol;Acc:2766]	AAC51728	ENSG00000164825	ILMN_1686573
160	25.2915	I	18	DEFB1	defensin, beta 1 [Source:HGNC Symbol;Acc:2766]	AAC51728	ENSG00000164825	ILMN_1686573
321	2.18521	II	12	DEFB1	defensin, beta 1 [Source:HGNC Symbol;Acc:2766]	AAC51728	ENSG00000164825	ILMN_1686573
322	2.18875	II	6	DEFB1	defensin, beta 1 [Source:HGNC Symbol;Acc:2766]	AAC51728	ENSG00000164825	ILMN_1686573
201	2.2994	I	2	DEFB1	defensin, beta 1 [Source:HGNC Symbol;Acc:2766]	AAC51728	ENSG00000164825	8149097
202	3.72098	I	6	DEFB1	defensin, beta 1 [Source:HGNC Symbol;Acc:2766]	AAC51728	ENSG00000164825	8149097
12	2.67671	II	24	EMR1	egf-like module containing, mucin-like, hormone receptor-like 1 [Source:HGNC Symbol;Acc:3336]		ENSG00000174837	207111_at
14	2.44623	I	24	EMR1	egf-like module containing, mucin-like, hormone receptor-like 1 [Source:HGNC Symbol;Acc:3336]		ENSG00000174837	207111_at
63	2.33789	II	6	EMR1	egf-like module containing, mucin-like, hormone receptor-like 1 [Source:HGNC Symbol;Acc:3336]		ENSG00000174837	207111_at
306	2.44904	I	1.5	EMR1	egf-like module containing, mucin-like, hormone receptor-like 1 [Source:HGNC Symbol;Acc:3336]		ENSG00000174837	207111_at
311	2.01022	II	24	EMR1	egf-like module containing, mucin-like, hormone receptor-like 1 [Source:HGNC Symbol;Acc:3336]		ENSG00000174837	207111_at
313	2.88337	II	72	EMR1	egf-like module containing, mucin-like, hormone receptor-like 1 [Source:HGNC Symbol;Acc:3336]		ENSG00000174837	207111_at
373	2.67965	I	24	EMR1	egf-like module containing, mucin-like, hormone receptor-like 1 [Source:HGNC Symbol;Acc:3336]		ENSG00000174837	ILMN_1780601
202	2.4976	I	6	EMR1	egf-like module containing, mucin-like, hormone receptor-like 1 [Source:HGNC Symbol;Acc:3336]		ENSG00000174837	8025103
37	2.98377	II	5	ETS1	v-ets avian erythroblastosis virus E26 oncogene homolog 1 [Source:HGNC Symbol;Acc:3488]		ENSG00000134954	214447_at
89	3.71583	II	48	ETS1	v-ets avian erythroblastosis virus E26 oncogene homolog 1 [Source:HGNC Symbol;Acc:3488]		ENSG00000134954	7952601
90	3.92065	II	72	ETS1	v-ets avian erythroblastosis virus E26 oncogene homolog 1 [Source:HGNC Symbol;Acc:3488]		ENSG00000134954	7952601
85	2.3537	II	48	FYN	FYN oncogene related to SRC, FGR, YES [Source:HGNC Symbol;Acc:4037]		ENSG00000010810	ILMN_1686555
146	2.9424	II	4	GBP3	guanylate binding protein 3 [Source:HGNC Symbol;Acc:4184]		ENSG00000117226	A_24_P370702
147	5.17583	I	4	GBP3	guanylate binding protein 3 [Source:HGNC Symbol;Acc:4184]		ENSG00000117226	A_24_P370702
148	3.20068	I	6	GBP3	guanylate binding protein 3 [Source:HGNC Symbol;Acc:4184]		ENSG00000117226	A_24_P370702
149	4.609	I	24	GBP3	guanylate binding protein 3 [Source:HGNC Symbol;Acc:4184]		ENSG00000117226	A_24_P370702
318	9.92764	II	6	GBP3	guanylate binding protein 3 [Source:HGNC Symbol;Acc:4184]		ENSG00000117226	A_24_P370702
125	3.79704	I	3	GBP3	guanylate binding protein 3 [Source:HGNC Symbol;Acc:4184]		ENSG00000117226	A_23_P51487
146	3.00847	II	4	GBP3	guanylate binding protein 3 [Source:HGNC Symbol;Acc:4184]		ENSG00000117226	A_23_P51487
147	6.69044	I	4	GBP3	guanylate binding protein 3 [Source:HGNC Symbol;Acc:4184]		ENSG00000117226	A_23_P51487
148	2.87806	I	6	GBP3	guanylate binding protein 3 [Source:HGNC Symbol;Acc:4184]		ENSG00000117226	A_23_P51487
149	3.27033	I	24	GBP3	guanylate binding protein 3 [Source:HGNC Symbol;Acc:4184]		ENSG00000117226	A_23_P51487
173	18.7713	II	20	GBP3	guanylate binding protein 3 [Source:HGNC Symbol;Acc:4184]		ENSG00000117226	A_23_P51487
174	12.3692	II	20	GBP3	guanylate binding protein 3 [Source:HGNC Symbol;Acc:4184]		ENSG00000117226	A_23_P51487
192	2.01661	I	6	GBP3	guanylate binding protein 3 [Source:HGNC Symbol;Acc:4184]		ENSG00000117226	A_23_P51487
193	2.07285	I	12	GBP3	guanylate binding protein 3 [Source:HGNC Symbol;Acc:4184]		ENSG00000117226	A_23_P51487
226	7.95431	I	6	GBP3	guanylate binding protein 3 [Source:HGNC Symbol;Acc:4184]		ENSG00000117226	A_23_P51487
227	2.75278	I	12	GBP3	guanylate binding protein 3 [Source:HGNC Symbol;Acc:4184]		ENSG00000117226	A_23_P51487
228	3.21374	I	18	GBP3	guanylate binding protein 3 [Source:HGNC Symbol;Acc:4184]		ENSG00000117226	A_23_P51487
293	3.55756	II	24	GBP3	guanylate binding protein 3 [Source:HGNC Symbol;Acc:4184]		ENSG00000117226	A_23_P51487
318	12.9557	II	6	GBP3	guanylate binding protein 3 [Source:HGNC Symbol;Acc:4184]		ENSG00000117226	A_23_P51487
44	10.5079	I	6	GBP3	guanylate binding protein 3 [Source:HGNC Symbol;Acc:4184]		ENSG00000117226	223434_at
67	2.30822	I	6	GBP3	guanylate binding protein 3 [Source:HGNC Symbol;Acc:4184]		ENSG00000117226	223434_at
68	3.08333	II	96	GBP3	guanylate binding protein 3 [Source:HGNC Symbol;Acc:4184]		ENSG00000117226	223434_at
144	9.17519	II	24	GBP3	guanylate binding protein 3 [Source:HGNC Symbol;Acc:4184]		ENSG00000117226	223434_at
184	2.75975	II	24	GBP3	guanylate binding protein 3 [Source:HGNC Symbol;Acc:4184]		ENSG00000117226	223434_at
185	2.89171	I	16	GBP3	guanylate binding protein 3 [Source:HGNC Symbol;Acc:4184]		ENSG00000117226	223434_at
305	2.34397	II	1.5	GBP3	guanylate binding protein 3 [Source:HGNC Symbol;Acc:4184]		ENSG00000117226	223434_at
306	3.76271	I	1.5	GBP3	guanylate binding protein 3 [Source:HGNC Symbol;Acc:4184]		ENSG00000117226	223434_at
311	5.63796	II	24	GBP3	guanylate binding protein 3 [Source:HGNC Symbol;Acc:4184]		ENSG00000117226	223434_at
313	2.86103	II	72	GBP3	guanylate binding protein 3 [Source:HGNC Symbol;Acc:4184]		ENSG00000117226	223434_at
74	2.15525	I	16	GBP3	guanylate binding protein 3 [Source:HGNC Symbol;Acc:4184]		ENSG00000117226	ILMN_1725314
82	2.18432	II	12	GBP3	guanylate binding protein 3 [Source:HGNC Symbol;Acc:4184]		ENSG00000117226	ILMN_1725314
83	2.24146	II	24	GBP3	guanylate binding protein 3 [Source:HGNC Symbol;Acc:4184]		ENSG00000117226	ILMN_1725314
85	2.19558	II	48	GBP3	guanylate binding protein 3 [Source:HGNC Symbol;Acc:4184]		ENSG00000117226	ILMN_1725314
128	2.8573	II	10	GBP3	guanylate binding protein 3 [Source:HGNC Symbol;Acc:4184]		ENSG00000117226	ILMN_1725314
129	2.41285	I	10	GBP3	guanylate binding protein 3 [Source:HGNC Symbol;Acc:4184]		ENSG00000117226	ILMN_1725314
131	3.60336	II	10	GBP3	guanylate binding protein 3 [Source:HGNC Symbol;Acc:4184]		ENSG00000117226	ILMN_1725314
162	3.29021	II	6	GBP3	guanylate binding protein 3 [Source:HGNC Symbol;Acc:4184]		ENSG00000117226	ILMN_1725314
275	4.67903	I	8	GBP3	guanylate binding protein 3 [Source:HGNC Symbol;Acc:4184]		ENSG00000117226	ILMN_1725314
277	5.35376	I	8	GBP3	guanylate binding protein 3 [Source:HGNC Symbol;Acc:4184]		ENSG00000117226	ILMN_1725314
278	2.46603	I	2	GBP3	guanylate binding protein 3 [Source:HGNC Symbol;Acc:4184]		ENSG00000117226	ILMN_1725314
279	2.21926	I	48	GBP3	guanylate binding protein 3 [Source:HGNC Symbol;Acc:4184]		ENSG00000117226	ILMN_1725314
280	2.57475	I	48	GBP3	guanylate binding protein 3 [Source:HGNC Symbol;Acc:4184]		ENSG00000117226	ILMN_1725314
281	2.69164	I	48	GBP3	guanylate binding protein 3 [Source:HGNC Symbol;Acc:4184]		ENSG00000117226	ILMN_1725314
86	7.36625	II	3	GBP3	guanylate binding protein 3 [Source:HGNC Symbol;Acc:4184]		ENSG00000117226	7917514
201	4.26294	I	2	GBP3	guanylate binding protein 3 [Source:HGNC Symbol;Acc:4184]		ENSG00000117226	7917514
86	7.20676	II	3	GBP3	guanylate binding protein 3 [Source:HGNC Symbol;Acc:4184]		ENSG00000117226	7917503
87	5.64724	II	12	GBP3	guanylate binding protein 3 [Source:HGNC Symbol;Acc:4184]		ENSG00000117226	7917503
88	7.12932	II	24	GBP3	guanylate binding protein 3 [Source:HGNC Symbol;Acc:4184]		ENSG00000117226	7917503
89	3.83354	II	48	GBP3	guanylate binding protein 3 [Source:HGNC Symbol;Acc:4184]		ENSG00000117226	7917503
90	2.55244	II	72	GBP3	guanylate binding protein 3 [Source:HGNC Symbol;Acc:4184]		ENSG00000117226	7917503
143	2.28076	I	6	GBP3	guanylate binding protein 3 [Source:HGNC Symbol;Acc:4184]		ENSG00000117226	7917503
201	3.99872	I	2	GBP3	guanylate binding protein 3 [Source:HGNC Symbol;Acc:4184]		ENSG00000117226	7917503
202	2.065	I	6	GBP3	guanylate binding protein 3 [Source:HGNC Symbol;Acc:4184]		ENSG00000117226	7917503
302	3.38891	II	24	GBP3	guanylate binding protein 3 [Source:HGNC Symbol;Acc:4184]		ENSG00000117226	7917503
303	2.50191	I	24	GBP3	guanylate binding protein 3 [Source:HGNC Symbol;Acc:4184]		ENSG00000117226	7917503
307	3.60675	II	48	GBP3	guanylate binding protein 3 [Source:HGNC Symbol;Acc:4184]		ENSG00000117226	7917503
308	13.1312	II	48	GBP3	guanylate binding protein 3 [Source:HGNC Symbol;Acc:4184]		ENSG00000117226	7917503
317	3.33799	II	18	GPR183	G protein-coupled receptor 183 [Source:HGNC Symbol;Acc:3128]	AAA35924	ENSG00000169508	A_23_P25566
61	3.81319	I	72	GPR183	G protein-coupled receptor 183 [Source:HGNC Symbol;Acc:3128]	AAA35924	ENSG00000169508	205419_at
314	4.78415	II	24	GPR183	G protein-coupled receptor 183 [Source:HGNC Symbol;Acc:3128]	AAA35924	ENSG00000169508	205419_at
185	2.11193	I	16	HCK	hemopoietic cell kinase [Source:HGNC Symbol;Acc:4840]	BAF83617	ENSG00000101336	208018_s_at
126	2.68677	II	24	HCK	hemopoietic cell kinase [Source:HGNC Symbol;Acc:4840]	BAF83617	ENSG00000101336	A_24_P365526
173	3.32943	II	20	HLA-DQB1	major histocompatibility complex, class II, DQ beta 1 [Source:HGNC Symbol;Acc:4944]	AAU87980	ENSG00000179344	A_23_P136683
174	3.31631	II	20	HLA-DQB1	major histocompatibility complex, class II, DQ beta 1 [Source:HGNC Symbol;Acc:4944]	AAU87980	ENSG00000179344	A_23_P136683
293	12.8529	II	24	HLA-DQB1	major histocompatibility complex, class II, DQ beta 1 [Source:HGNC Symbol;Acc:4944]	AAU87980	ENSG00000179344	A_23_P136683
317	4.54209	II	18	HLA-DQB1	major histocompatibility complex, class II, DQ beta 1 [Source:HGNC Symbol;Acc:4944]	AAU87980	ENSG00000179344	A_23_P136683
318	8.97123	II	6	HLA-DQB1	major histocompatibility complex, class II, DQ beta 1 [Source:HGNC Symbol;Acc:4944]	AAU87980	ENSG00000179344	A_23_P136683
183	3.31537	II	24	HLA-DQB1	major histocompatibility complex, class II, DQ beta 1 [Source:HGNC Symbol;Acc:4944]	AAU87980	ENSG00000179344	212999_x_at
311	10.5044	II	24	HLA-DQB1	major histocompatibility complex, class II, DQ beta 1 [Source:HGNC Symbol;Acc:4944]	AAU87980	ENSG00000179344	212999_x_at
312	7.20361	II	144	HLA-DQB1	major histocompatibility complex, class II, DQ beta 1 [Source:HGNC Symbol;Acc:4944]	AAU87980	ENSG00000179344	212999_x_at
313	7.84781	II	72	HLA-DQB1	major histocompatibility complex, class II, DQ beta 1 [Source:HGNC Symbol;Acc:4944]	AAU87980	ENSG00000179344	212999_x_at
314	3.64009	II	24	HLA-DQB1	major histocompatibility complex, class II, DQ beta 1 [Source:HGNC Symbol;Acc:4944]	AAU87980	ENSG00000179344	212999_x_at
314	3.69762	II	24	HLA-DQB1	major histocompatibility complex, class II, DQ beta 1 [Source:HGNC Symbol;Acc:4944]	AAU87980	ENSG00000179344	209480_at
64	17.4501	II	24	HLA-DQB1	major histocompatibility complex, class II, DQ beta 1 [Source:HGNC Symbol;Acc:4944]	AAU87980	ENSG00000179344	212998_x_at
68	35.1657	II	96	HLA-DQB1	major histocompatibility complex, class II, DQ beta 1 [Source:HGNC Symbol;Acc:4944]	AAU87980	ENSG00000179344	212998_x_at
183	2.30277	II	24	HLA-DQB1	major histocompatibility complex, class II, DQ beta 1 [Source:HGNC Symbol;Acc:4944]	AAU87980	ENSG00000179344	212998_x_at
295	3.82638	II	24	HLA-DQB1	major histocompatibility complex, class II, DQ beta 1 [Source:HGNC Symbol;Acc:4944]	AAU87980	ENSG00000179344	212998_x_at
311	7.78606	II	24	HLA-DQB1	major histocompatibility complex, class II, DQ beta 1 [Source:HGNC Symbol;Acc:4944]	AAU87980	ENSG00000179344	212998_x_at
312	4.75048	II	144	HLA-DQB1	major histocompatibility complex, class II, DQ beta 1 [Source:HGNC Symbol;Acc:4944]	AAU87980	ENSG00000179344	212998_x_at
313	5.14094	II	72	HLA-DQB1	major histocompatibility complex, class II, DQ beta 1 [Source:HGNC Symbol;Acc:4944]	AAU87980	ENSG00000179344	212998_x_at
314	2.41716	II	24	HLA-DQB1	major histocompatibility complex, class II, DQ beta 1 [Source:HGNC Symbol;Acc:4944]	AAU87980	ENSG00000179344	212998_x_at
313	2.33054	II	72	HLA-DQB1	major histocompatibility complex, class II, DQ beta 1 [Source:HGNC Symbol;Acc:4944]	AAU87980	ENSG00000179344	210747_at
64	3.33205	II	24	HLA-DQB1	major histocompatibility complex, class II, DQ beta 1 [Source:HGNC Symbol;Acc:4944]	AAU87980	ENSG00000179344	211654_x_at
68	18.6108	II	96	HLA-DQB1	major histocompatibility complex, class II, DQ beta 1 [Source:HGNC Symbol;Acc:4944]	AAU87980	ENSG00000179344	211654_x_at
183	2.45707	II	24	HLA-DQB1	major histocompatibility complex, class II, DQ beta 1 [Source:HGNC Symbol;Acc:4944]	AAU87980	ENSG00000179344	211654_x_at
295	2.20337	II	24	HLA-DQB1	major histocompatibility complex, class II, DQ beta 1 [Source:HGNC Symbol;Acc:4944]	AAU87980	ENSG00000179344	211654_x_at
311	7.73819	II	24	HLA-DQB1	major histocompatibility complex, class II, DQ beta 1 [Source:HGNC Symbol;Acc:4944]	AAU87980	ENSG00000179344	211654_x_at
312	4.19822	II	144	HLA-DQB1	major histocompatibility complex, class II, DQ beta 1 [Source:HGNC Symbol;Acc:4944]	AAU87980	ENSG00000179344	211654_x_at
313	4.8092	II	72	HLA-DQB1	major histocompatibility complex, class II, DQ beta 1 [Source:HGNC Symbol;Acc:4944]	AAU87980	ENSG00000179344	211654_x_at
314	2.98221	II	24	HLA-DQB1	major histocompatibility complex, class II, DQ beta 1 [Source:HGNC Symbol;Acc:4944]	AAU87980	ENSG00000179344	211654_x_at
307	4.99032	II	48	HLA-DQB1	major histocompatibility complex, class II, DQ beta 1 [Source:HGNC Symbol;Acc:4944]	AAU87980	ENSG00000179344	8125461
308	3.34545	II	48	HLA-DQB1	major histocompatibility complex, class II, DQ beta 1 [Source:HGNC Symbol;Acc:4944]	AAU87980	ENSG00000179344	8125461
302	14.9446	II	24	HLA-DQB1	major histocompatibility complex, class II, DQ beta 1 [Source:HGNC Symbol;Acc:4944]	AAU87980	ENSG00000179344	8125447
307	22.5249	II	48	HLA-DQB1	major histocompatibility complex, class II, DQ beta 1 [Source:HGNC Symbol;Acc:4944]	AAU87980	ENSG00000179344	8125447
87	2.94666	II	12	HLA-DQB1	major histocompatibility complex, class II, DQ beta 1 [Source:HGNC Symbol;Acc:4944]	AAU87980	ENSG00000179344	8180022
88	2.64003	II	24	HLA-DQB1	major histocompatibility complex, class II, DQ beta 1 [Source:HGNC Symbol;Acc:4944]	AAU87980	ENSG00000179344	8180022
89	2.07281	II	48	HLA-DQB1	major histocompatibility complex, class II, DQ beta 1 [Source:HGNC Symbol;Acc:4944]	AAU87980	ENSG00000179344	8180022
307	5.101	II	48	HLA-DQB1	major histocompatibility complex, class II, DQ beta 1 [Source:HGNC Symbol;Acc:4944]	AAU87980	ENSG00000179344	8180022
308	3.51945	II	48	HLA-DQB1	major histocompatibility complex, class II, DQ beta 1 [Source:HGNC Symbol;Acc:4944]	AAU87980	ENSG00000179344	8180022
87	2.94666	II	12	HLA-DQB1	major histocompatibility complex, class II, DQ beta 1 [Source:HGNC Symbol;Acc:4944]	AAU87980	ENSG00000179344	8178826
88	2.64003	II	24	HLA-DQB1	major histocompatibility complex, class II, DQ beta 1 [Source:HGNC Symbol;Acc:4944]	AAU87980	ENSG00000179344	8178826
89	2.07281	II	48	HLA-DQB1	major histocompatibility complex, class II, DQ beta 1 [Source:HGNC Symbol;Acc:4944]	AAU87980	ENSG00000179344	8178826
307	5.101	II	48	HLA-DQB1	major histocompatibility complex, class II, DQ beta 1 [Source:HGNC Symbol;Acc:4944]	AAU87980	ENSG00000179344	8178826
308	3.51945	II	48	HLA-DQB1	major histocompatibility complex, class II, DQ beta 1 [Source:HGNC Symbol;Acc:4944]	AAU87980	ENSG00000179344	8178826
293	45.2206	II	24	HLA-DRA	major histocompatibility complex, class II, DR alpha [Source:HGNC Symbol;Acc:4947]	AAA59787	ENSG00000204287	A_32_P87697
317	6.43362	II	18	HLA-DRA	major histocompatibility complex, class II, DR alpha [Source:HGNC Symbol;Acc:4947]	AAA59787	ENSG00000204287	A_32_P87697
318	15.2829	II	6	HLA-DRA	major histocompatibility complex, class II, DR alpha [Source:HGNC Symbol;Acc:4947]	AAA59787	ENSG00000204287	A_32_P87697
63	3.32416	II	6	HLA-DRA	major histocompatibility complex, class II, DR alpha [Source:HGNC Symbol;Acc:4947]	AAA59787	ENSG00000204287	210982_s_at
64	3.44509	II	24	HLA-DRA	major histocompatibility complex, class II, DR alpha [Source:HGNC Symbol;Acc:4947]	AAA59787	ENSG00000204287	210982_s_at
144	202.898	II	24	HLA-DRA	major histocompatibility complex, class II, DR alpha [Source:HGNC Symbol;Acc:4947]	AAA59787	ENSG00000204287	210982_s_at
295	50.9213	II	24	HLA-DRA	major histocompatibility complex, class II, DR alpha [Source:HGNC Symbol;Acc:4947]	AAA59787	ENSG00000204287	210982_s_at
82	2.27929	II	12	HLA-DRA	major histocompatibility complex, class II, DR alpha [Source:HGNC Symbol;Acc:4947]	AAA59787	ENSG00000204287	ILMN_1689655
83	12.1164	II	24	HLA-DRA	major histocompatibility complex, class II, DR alpha [Source:HGNC Symbol;Acc:4947]	AAA59787	ENSG00000204287	ILMN_1689655
85	33.819	II	48	HLA-DRA	major histocompatibility complex, class II, DR alpha [Source:HGNC Symbol;Acc:4947]	AAA59787	ENSG00000204287	ILMN_1689655
128	11.3304	II	10	HLA-DRA	major histocompatibility complex, class II, DR alpha [Source:HGNC Symbol;Acc:4947]	AAA59787	ENSG00000204287	ILMN_1689655
129	2.2575	I	10	HLA-DRA	major histocompatibility complex, class II, DR alpha [Source:HGNC Symbol;Acc:4947]	AAA59787	ENSG00000204287	ILMN_1689655
130	2.51458	I	10	HLA-DRA	major histocompatibility complex, class II, DR alpha [Source:HGNC Symbol;Acc:4947]	AAA59787	ENSG00000204287	ILMN_1689655
131	12.8996	II	10	HLA-DRA	major histocompatibility complex, class II, DR alpha [Source:HGNC Symbol;Acc:4947]	AAA59787	ENSG00000204287	ILMN_1689655
83	11.9208	II	24	HLA-DRA	major histocompatibility complex, class II, DR alpha [Source:HGNC Symbol;Acc:4947]	AAA59787	ENSG00000204287	ILMN_2157441
85	35.4387	II	48	HLA-DRA	major histocompatibility complex, class II, DR alpha [Source:HGNC Symbol;Acc:4947]	AAA59787	ENSG00000204287	ILMN_2157441
128	43.0186	II	10	HLA-DRA	major histocompatibility complex, class II, DR alpha [Source:HGNC Symbol;Acc:4947]	AAA59787	ENSG00000204287	ILMN_2157441
129	4.37714	I	10	HLA-DRA	major histocompatibility complex, class II, DR alpha [Source:HGNC Symbol;Acc:4947]	AAA59787	ENSG00000204287	ILMN_2157441
130	4.38555	I	10	HLA-DRA	major histocompatibility complex, class II, DR alpha [Source:HGNC Symbol;Acc:4947]	AAA59787	ENSG00000204287	ILMN_2157441
131	57.9966	II	10	HLA-DRA	major histocompatibility complex, class II, DR alpha [Source:HGNC Symbol;Acc:4947]	AAA59787	ENSG00000204287	ILMN_2157441
275	3.10802	I	8	HLA-DRA	major histocompatibility complex, class II, DR alpha [Source:HGNC Symbol;Acc:4947]	AAA59787	ENSG00000204287	ILMN_2157441
63	2.87618	II	6	HLA-DRA	major histocompatibility complex, class II, DR alpha [Source:HGNC Symbol;Acc:4947]	AAA59787	ENSG00000204287	208894_at
64	3.42736	II	24	HLA-DRA	major histocompatibility complex, class II, DR alpha [Source:HGNC Symbol;Acc:4947]	AAA59787	ENSG00000204287	208894_at
68	128.078	II	96	HLA-DRA	major histocompatibility complex, class II, DR alpha [Source:HGNC Symbol;Acc:4947]	AAA59787	ENSG00000204287	208894_at
144	179.22	II	24	HLA-DRA	major histocompatibility complex, class II, DR alpha [Source:HGNC Symbol;Acc:4947]	AAA59787	ENSG00000204287	208894_at
295	43.3336	II	24	HLA-DRA	major histocompatibility complex, class II, DR alpha [Source:HGNC Symbol;Acc:4947]	AAA59787	ENSG00000204287	208894_at
299	3.23575	II	24	HLA-DRA	major histocompatibility complex, class II, DR alpha [Source:HGNC Symbol;Acc:4947]	AAA59787	ENSG00000204287	208894_at
304	2.49747	II	6	HLA-DRA	major histocompatibility complex, class II, DR alpha [Source:HGNC Symbol;Acc:4947]	AAA59787	ENSG00000204287	8179481
307	19.3773	II	48	HLA-DRA	major histocompatibility complex, class II, DR alpha [Source:HGNC Symbol;Acc:4947]	AAA59787	ENSG00000204287	8179481
307	19.4475	II	48	HLA-DRA	major histocompatibility complex, class II, DR alpha [Source:HGNC Symbol;Acc:4947]	AAA59787	ENSG00000204287	8118548
304	2.64406	II	6	HLA-DRA	major histocompatibility complex, class II, DR alpha [Source:HGNC Symbol;Acc:4947]	AAA59787	ENSG00000204287	8178193
307	20.0438	II	48	HLA-DRA	major histocompatibility complex, class II, DR alpha [Source:HGNC Symbol;Acc:4947]	AAA59787	ENSG00000204287	8178193
146	3.52267	II	4	IFI16	interferon, gamma-inducible protein 16 [Source:HGNC Symbol;Acc:5395]	AAA58683	ENSG00000163565	A_23_P217866
147	6.8035	I	4	IFI16	interferon, gamma-inducible protein 16 [Source:HGNC Symbol;Acc:5395]	AAA58683	ENSG00000163565	A_23_P217866
148	4.67507	I	6	IFI16	interferon, gamma-inducible protein 16 [Source:HGNC Symbol;Acc:5395]	AAA58683	ENSG00000163565	A_23_P217866
318	6.8056	II	6	IFI16	interferon, gamma-inducible protein 16 [Source:HGNC Symbol;Acc:5395]	AAA58683	ENSG00000163565	A_23_P217866
125	4.90898	I	3	IFI16	interferon, gamma-inducible protein 16 [Source:HGNC Symbol;Acc:5395]	AAA58683	ENSG00000163565	A_23_P160025
148	3.3205	I	6	IFI16	interferon, gamma-inducible protein 16 [Source:HGNC Symbol;Acc:5395]	AAA58683	ENSG00000163565	A_23_P160025
149	10.4991	I	24	IFI16	interferon, gamma-inducible protein 16 [Source:HGNC Symbol;Acc:5395]	AAA58683	ENSG00000163565	A_23_P160025
174	3.575	II	20	IFI16	interferon, gamma-inducible protein 16 [Source:HGNC Symbol;Acc:5395]	AAA58683	ENSG00000163565	A_23_P160025
192	5.12836	I	6	IFI16	interferon, gamma-inducible protein 16 [Source:HGNC Symbol;Acc:5395]	AAA58683	ENSG00000163565	A_23_P160025
193	7.22741	I	12	IFI16	interferon, gamma-inducible protein 16 [Source:HGNC Symbol;Acc:5395]	AAA58683	ENSG00000163565	A_23_P160025
226	12.0444	I	6	IFI16	interferon, gamma-inducible protein 16 [Source:HGNC Symbol;Acc:5395]	AAA58683	ENSG00000163565	A_23_P160025
227	6.43317	I	12	IFI16	interferon, gamma-inducible protein 16 [Source:HGNC Symbol;Acc:5395]	AAA58683	ENSG00000163565	A_23_P160025
228	6.03466	I	18	IFI16	interferon, gamma-inducible protein 16 [Source:HGNC Symbol;Acc:5395]	AAA58683	ENSG00000163565	A_23_P160025
318	6.47383	II	6	IFI16	interferon, gamma-inducible protein 16 [Source:HGNC Symbol;Acc:5395]	AAA58683	ENSG00000163565	A_23_P160025
32	3.38237	I	3	IFI16	interferon, gamma-inducible protein 16 [Source:HGNC Symbol;Acc:5395]	AAA58683	ENSG00000163565	1456_s_at
58	2.0982	I	3	IFI16	interferon, gamma-inducible protein 16 [Source:HGNC Symbol;Acc:5395]	AAA58683	ENSG00000163565	1456_s_at
12	5.65508	II	24	IFI16	interferon, gamma-inducible protein 16 [Source:HGNC Symbol;Acc:5395]	AAA58683	ENSG00000163565	208965_s_at
13	24.4624	II	6	IFI16	interferon, gamma-inducible protein 16 [Source:HGNC Symbol;Acc:5395]	AAA58683	ENSG00000163565	208965_s_at
15	59.2688	I	6	IFI16	interferon, gamma-inducible protein 16 [Source:HGNC Symbol;Acc:5395]	AAA58683	ENSG00000163565	208965_s_at
22	4.76627	I	12	IFI16	interferon, gamma-inducible protein 16 [Source:HGNC Symbol;Acc:5395]	AAA58683	ENSG00000163565	208965_s_at
23	3.22139	I	8	IFI16	interferon, gamma-inducible protein 16 [Source:HGNC Symbol;Acc:5395]	AAA58683	ENSG00000163565	208965_s_at
24	3.57288	I	6	IFI16	interferon, gamma-inducible protein 16 [Source:HGNC Symbol;Acc:5395]	AAA58683	ENSG00000163565	208965_s_at
25	2.82587	I	4	IFI16	interferon, gamma-inducible protein 16 [Source:HGNC Symbol;Acc:5395]	AAA58683	ENSG00000163565	208965_s_at
27	2.18949	I	1.5	IFI16	interferon, gamma-inducible protein 16 [Source:HGNC Symbol;Acc:5395]	AAA58683	ENSG00000163565	208965_s_at
37	12.9662	II	5	IFI16	interferon, gamma-inducible protein 16 [Source:HGNC Symbol;Acc:5395]	AAA58683	ENSG00000163565	208965_s_at
38	13.1321	I	5	IFI16	interferon, gamma-inducible protein 16 [Source:HGNC Symbol;Acc:5395]	AAA58683	ENSG00000163565	208965_s_at
41	3.20623	I	5	IFI16	interferon, gamma-inducible protein 16 [Source:HGNC Symbol;Acc:5395]	AAA58683	ENSG00000163565	208965_s_at
43	2.79538	I	12	IFI16	interferon, gamma-inducible protein 16 [Source:HGNC Symbol;Acc:5395]	AAA58683	ENSG00000163565	208965_s_at
44	10.3454	I	6	IFI16	interferon, gamma-inducible protein 16 [Source:HGNC Symbol;Acc:5395]	AAA58683	ENSG00000163565	208965_s_at
45	2.96835	I	12	IFI16	interferon, gamma-inducible protein 16 [Source:HGNC Symbol;Acc:5395]	AAA58683	ENSG00000163565	208965_s_at
46	4.60533	I	6	IFI16	interferon, gamma-inducible protein 16 [Source:HGNC Symbol;Acc:5395]	AAA58683	ENSG00000163565	208965_s_at
47	13.0571	I	5	IFI16	interferon, gamma-inducible protein 16 [Source:HGNC Symbol;Acc:5395]	AAA58683	ENSG00000163565	208965_s_at
61	2.29686	I	72	IFI16	interferon, gamma-inducible protein 16 [Source:HGNC Symbol;Acc:5395]	AAA58683	ENSG00000163565	208965_s_at
63	2.52279	II	6	IFI16	interferon, gamma-inducible protein 16 [Source:HGNC Symbol;Acc:5395]	AAA58683	ENSG00000163565	208965_s_at
67	3.52469	I	6	IFI16	interferon, gamma-inducible protein 16 [Source:HGNC Symbol;Acc:5395]	AAA58683	ENSG00000163565	208965_s_at
144	3.17344	II	24	IFI16	interferon, gamma-inducible protein 16 [Source:HGNC Symbol;Acc:5395]	AAA58683	ENSG00000163565	208965_s_at
177	3.22151	I	48	IFI16	interferon, gamma-inducible protein 16 [Source:HGNC Symbol;Acc:5395]	AAA58683	ENSG00000163565	208965_s_at
182	4.72562	II	8	IFI16	interferon, gamma-inducible protein 16 [Source:HGNC Symbol;Acc:5395]	AAA58683	ENSG00000163565	208965_s_at
185	4.03793	I	16	IFI16	interferon, gamma-inducible protein 16 [Source:HGNC Symbol;Acc:5395]	AAA58683	ENSG00000163565	208965_s_at
186	2.01707	I	48	IFI16	interferon, gamma-inducible protein 16 [Source:HGNC Symbol;Acc:5395]	AAA58683	ENSG00000163565	208965_s_at
295	2.61419	II	24	IFI16	interferon, gamma-inducible protein 16 [Source:HGNC Symbol;Acc:5395]	AAA58683	ENSG00000163565	208965_s_at
300	2.2952	I	6	IFI16	interferon, gamma-inducible protein 16 [Source:HGNC Symbol;Acc:5395]	AAA58683	ENSG00000163565	208965_s_at
305	3.11962	II	1.5	IFI16	interferon, gamma-inducible protein 16 [Source:HGNC Symbol;Acc:5395]	AAA58683	ENSG00000163565	208965_s_at
306	4.43024	I	1.5	IFI16	interferon, gamma-inducible protein 16 [Source:HGNC Symbol;Acc:5395]	AAA58683	ENSG00000163565	208965_s_at
313	2.08527	II	72	IFI16	interferon, gamma-inducible protein 16 [Source:HGNC Symbol;Acc:5395]	AAA58683	ENSG00000163565	208965_s_at
12	5.72184	II	24	IFI16	interferon, gamma-inducible protein 16 [Source:HGNC Symbol;Acc:5395]	AAA58683	ENSG00000163565	206332_s_at
13	5.61835	II	6	IFI16	interferon, gamma-inducible protein 16 [Source:HGNC Symbol;Acc:5395]	AAA58683	ENSG00000163565	206332_s_at
14	6.83308	I	24	IFI16	interferon, gamma-inducible protein 16 [Source:HGNC Symbol;Acc:5395]	AAA58683	ENSG00000163565	206332_s_at
15	11.2999	I	6	IFI16	interferon, gamma-inducible protein 16 [Source:HGNC Symbol;Acc:5395]	AAA58683	ENSG00000163565	206332_s_at
21	2.81516	I	18	IFI16	interferon, gamma-inducible protein 16 [Source:HGNC Symbol;Acc:5395]	AAA58683	ENSG00000163565	206332_s_at
22	2.95337	I	12	IFI16	interferon, gamma-inducible protein 16 [Source:HGNC Symbol;Acc:5395]	AAA58683	ENSG00000163565	206332_s_at
23	3.22364	I	8	IFI16	interferon, gamma-inducible protein 16 [Source:HGNC Symbol;Acc:5395]	AAA58683	ENSG00000163565	206332_s_at
24	2.91148	I	6	IFI16	interferon, gamma-inducible protein 16 [Source:HGNC Symbol;Acc:5395]	AAA58683	ENSG00000163565	206332_s_at
25	2.52073	I	4	IFI16	interferon, gamma-inducible protein 16 [Source:HGNC Symbol;Acc:5395]	AAA58683	ENSG00000163565	206332_s_at
40	2.3465	I	5	IFI16	interferon, gamma-inducible protein 16 [Source:HGNC Symbol;Acc:5395]	AAA58683	ENSG00000163565	206332_s_at
41	2.32228	I	5	IFI16	interferon, gamma-inducible protein 16 [Source:HGNC Symbol;Acc:5395]	AAA58683	ENSG00000163565	206332_s_at
43	2.54577	I	12	IFI16	interferon, gamma-inducible protein 16 [Source:HGNC Symbol;Acc:5395]	AAA58683	ENSG00000163565	206332_s_at
44	6.95745	I	6	IFI16	interferon, gamma-inducible protein 16 [Source:HGNC Symbol;Acc:5395]	AAA58683	ENSG00000163565	206332_s_at
45	6.5219	I	12	IFI16	interferon, gamma-inducible protein 16 [Source:HGNC Symbol;Acc:5395]	AAA58683	ENSG00000163565	206332_s_at
46	11.579	I	6	IFI16	interferon, gamma-inducible protein 16 [Source:HGNC Symbol;Acc:5395]	AAA58683	ENSG00000163565	206332_s_at
47	43.5225	I	5	IFI16	interferon, gamma-inducible protein 16 [Source:HGNC Symbol;Acc:5395]	AAA58683	ENSG00000163565	206332_s_at
48	11.2333	I	5	IFI16	interferon, gamma-inducible protein 16 [Source:HGNC Symbol;Acc:5395]	AAA58683	ENSG00000163565	206332_s_at
61	2.08107	I	72	IFI16	interferon, gamma-inducible protein 16 [Source:HGNC Symbol;Acc:5395]	AAA58683	ENSG00000163565	206332_s_at
67	4.18678	I	6	IFI16	interferon, gamma-inducible protein 16 [Source:HGNC Symbol;Acc:5395]	AAA58683	ENSG00000163565	206332_s_at
177	2.67364	I	48	IFI16	interferon, gamma-inducible protein 16 [Source:HGNC Symbol;Acc:5395]	AAA58683	ENSG00000163565	206332_s_at
185	3.21479	I	16	IFI16	interferon, gamma-inducible protein 16 [Source:HGNC Symbol;Acc:5395]	AAA58683	ENSG00000163565	206332_s_at
295	2.36223	II	24	IFI16	interferon, gamma-inducible protein 16 [Source:HGNC Symbol;Acc:5395]	AAA58683	ENSG00000163565	206332_s_at
298	3.87135	II	24	IFI16	interferon, gamma-inducible protein 16 [Source:HGNC Symbol;Acc:5395]	AAA58683	ENSG00000163565	206332_s_at
305	2.51225	II	1.5	IFI16	interferon, gamma-inducible protein 16 [Source:HGNC Symbol;Acc:5395]	AAA58683	ENSG00000163565	206332_s_at
306	2.55801	I	1.5	IFI16	interferon, gamma-inducible protein 16 [Source:HGNC Symbol;Acc:5395]	AAA58683	ENSG00000163565	206332_s_at
12	6.27288	II	24	IFI16	interferon, gamma-inducible protein 16 [Source:HGNC Symbol;Acc:5395]	AAA58683	ENSG00000163565	208966_x_at
13	6.26329	II	6	IFI16	interferon, gamma-inducible protein 16 [Source:HGNC Symbol;Acc:5395]	AAA58683	ENSG00000163565	208966_x_at
14	7.72136	I	24	IFI16	interferon, gamma-inducible protein 16 [Source:HGNC Symbol;Acc:5395]	AAA58683	ENSG00000163565	208966_x_at
15	12.7552	I	6	IFI16	interferon, gamma-inducible protein 16 [Source:HGNC Symbol;Acc:5395]	AAA58683	ENSG00000163565	208966_x_at
21	2.83724	I	18	IFI16	interferon, gamma-inducible protein 16 [Source:HGNC Symbol;Acc:5395]	AAA58683	ENSG00000163565	208966_x_at
22	2.89364	I	12	IFI16	interferon, gamma-inducible protein 16 [Source:HGNC Symbol;Acc:5395]	AAA58683	ENSG00000163565	208966_x_at
23	2.8734	I	8	IFI16	interferon, gamma-inducible protein 16 [Source:HGNC Symbol;Acc:5395]	AAA58683	ENSG00000163565	208966_x_at
24	2.93565	I	6	IFI16	interferon, gamma-inducible protein 16 [Source:HGNC Symbol;Acc:5395]	AAA58683	ENSG00000163565	208966_x_at
25	2.46781	I	4	IFI16	interferon, gamma-inducible protein 16 [Source:HGNC Symbol;Acc:5395]	AAA58683	ENSG00000163565	208966_x_at
40	2.45004	I	5	IFI16	interferon, gamma-inducible protein 16 [Source:HGNC Symbol;Acc:5395]	AAA58683	ENSG00000163565	208966_x_at
41	2.31735	I	5	IFI16	interferon, gamma-inducible protein 16 [Source:HGNC Symbol;Acc:5395]	AAA58683	ENSG00000163565	208966_x_at
43	2.37143	I	12	IFI16	interferon, gamma-inducible protein 16 [Source:HGNC Symbol;Acc:5395]	AAA58683	ENSG00000163565	208966_x_at
44	7.83212	I	6	IFI16	interferon, gamma-inducible protein 16 [Source:HGNC Symbol;Acc:5395]	AAA58683	ENSG00000163565	208966_x_at
45	5.87173	I	12	IFI16	interferon, gamma-inducible protein 16 [Source:HGNC Symbol;Acc:5395]	AAA58683	ENSG00000163565	208966_x_at
46	10.9368	I	6	IFI16	interferon, gamma-inducible protein 16 [Source:HGNC Symbol;Acc:5395]	AAA58683	ENSG00000163565	208966_x_at
47	32.2214	I	5	IFI16	interferon, gamma-inducible protein 16 [Source:HGNC Symbol;Acc:5395]	AAA58683	ENSG00000163565	208966_x_at
48	10.2747	I	5	IFI16	interferon, gamma-inducible protein 16 [Source:HGNC Symbol;Acc:5395]	AAA58683	ENSG00000163565	208966_x_at
61	2.10351	I	72	IFI16	interferon, gamma-inducible protein 16 [Source:HGNC Symbol;Acc:5395]	AAA58683	ENSG00000163565	208966_x_at
67	4.01159	I	6	IFI16	interferon, gamma-inducible protein 16 [Source:HGNC Symbol;Acc:5395]	AAA58683	ENSG00000163565	208966_x_at
177	2.89939	I	48	IFI16	interferon, gamma-inducible protein 16 [Source:HGNC Symbol;Acc:5395]	AAA58683	ENSG00000163565	208966_x_at
185	3.06323	I	16	IFI16	interferon, gamma-inducible protein 16 [Source:HGNC Symbol;Acc:5395]	AAA58683	ENSG00000163565	208966_x_at
295	2.28453	II	24	IFI16	interferon, gamma-inducible protein 16 [Source:HGNC Symbol;Acc:5395]	AAA58683	ENSG00000163565	208966_x_at
298	4.28639	II	24	IFI16	interferon, gamma-inducible protein 16 [Source:HGNC Symbol;Acc:5395]	AAA58683	ENSG00000163565	208966_x_at
305	2.75027	II	1.5	IFI16	interferon, gamma-inducible protein 16 [Source:HGNC Symbol;Acc:5395]	AAA58683	ENSG00000163565	208966_x_at
306	2.58896	I	1.5	IFI16	interferon, gamma-inducible protein 16 [Source:HGNC Symbol;Acc:5395]	AAA58683	ENSG00000163565	208966_x_at
75	3.92938	I	16	IFI16	interferon, gamma-inducible protein 16 [Source:HGNC Symbol;Acc:5395]	AAA58683	ENSG00000163565	ILMN_1710937
78	12.0696	I	12	IFI16	interferon, gamma-inducible protein 16 [Source:HGNC Symbol;Acc:5395]	AAA58683	ENSG00000163565	ILMN_1710937
79	9.76244	I	24	IFI16	interferon, gamma-inducible protein 16 [Source:HGNC Symbol;Acc:5395]	AAA58683	ENSG00000163565	ILMN_1710937
80	7.52937	I	48	IFI16	interferon, gamma-inducible protein 16 [Source:HGNC Symbol;Acc:5395]	AAA58683	ENSG00000163565	ILMN_1710937
81	8.92229	I	4	IFI16	interferon, gamma-inducible protein 16 [Source:HGNC Symbol;Acc:5395]	AAA58683	ENSG00000163565	ILMN_1710937
82	8.0441	II	12	IFI16	interferon, gamma-inducible protein 16 [Source:HGNC Symbol;Acc:5395]	AAA58683	ENSG00000163565	ILMN_1710937
83	7.57115	II	24	IFI16	interferon, gamma-inducible protein 16 [Source:HGNC Symbol;Acc:5395]	AAA58683	ENSG00000163565	ILMN_1710937
84	3.3065	II	4	IFI16	interferon, gamma-inducible protein 16 [Source:HGNC Symbol;Acc:5395]	AAA58683	ENSG00000163565	ILMN_1710937
85	8.5772	II	48	IFI16	interferon, gamma-inducible protein 16 [Source:HGNC Symbol;Acc:5395]	AAA58683	ENSG00000163565	ILMN_1710937
128	3.1126	II	10	IFI16	interferon, gamma-inducible protein 16 [Source:HGNC Symbol;Acc:5395]	AAA58683	ENSG00000163565	ILMN_1710937
129	4.63729	I	10	IFI16	interferon, gamma-inducible protein 16 [Source:HGNC Symbol;Acc:5395]	AAA58683	ENSG00000163565	ILMN_1710937
130	3.27142	I	10	IFI16	interferon, gamma-inducible protein 16 [Source:HGNC Symbol;Acc:5395]	AAA58683	ENSG00000163565	ILMN_1710937
131	3.1046	II	10	IFI16	interferon, gamma-inducible protein 16 [Source:HGNC Symbol;Acc:5395]	AAA58683	ENSG00000163565	ILMN_1710937
160	3.21203	I	18	IFI16	interferon, gamma-inducible protein 16 [Source:HGNC Symbol;Acc:5395]	AAA58683	ENSG00000163565	ILMN_1710937
200	2.37743	I	10	IFI16	interferon, gamma-inducible protein 16 [Source:HGNC Symbol;Acc:5395]	AAA58683	ENSG00000163565	ILMN_1710937
275	5.37822	I	8	IFI16	interferon, gamma-inducible protein 16 [Source:HGNC Symbol;Acc:5395]	AAA58683	ENSG00000163565	ILMN_1710937
276	2.80726	I	2	IFI16	interferon, gamma-inducible protein 16 [Source:HGNC Symbol;Acc:5395]	AAA58683	ENSG00000163565	ILMN_1710937
277	5.50164	I	8	IFI16	interferon, gamma-inducible protein 16 [Source:HGNC Symbol;Acc:5395]	AAA58683	ENSG00000163565	ILMN_1710937
278	2.76614	I	2	IFI16	interferon, gamma-inducible protein 16 [Source:HGNC Symbol;Acc:5395]	AAA58683	ENSG00000163565	ILMN_1710937
279	3.40036	I	48	IFI16	interferon, gamma-inducible protein 16 [Source:HGNC Symbol;Acc:5395]	AAA58683	ENSG00000163565	ILMN_1710937
280	2.51537	I	48	IFI16	interferon, gamma-inducible protein 16 [Source:HGNC Symbol;Acc:5395]	AAA58683	ENSG00000163565	ILMN_1710937
281	4.13731	I	48	IFI16	interferon, gamma-inducible protein 16 [Source:HGNC Symbol;Acc:5395]	AAA58683	ENSG00000163565	ILMN_1710937
356	2.06684	I	24	IFI16	interferon, gamma-inducible protein 16 [Source:HGNC Symbol;Acc:5395]	AAA58683	ENSG00000163565	ILMN_1710937
358	2.17511	I	12	IFI16	interferon, gamma-inducible protein 16 [Source:HGNC Symbol;Acc:5395]	AAA58683	ENSG00000163565	ILMN_1710937
360	3.1629	I	3	IFI16	interferon, gamma-inducible protein 16 [Source:HGNC Symbol;Acc:5395]	AAA58683	ENSG00000163565	ILMN_1710937
362	2.62134	I	6	IFI16	interferon, gamma-inducible protein 16 [Source:HGNC Symbol;Acc:5395]	AAA58683	ENSG00000163565	ILMN_1710937
373	5.21064	I	24	IFI16	interferon, gamma-inducible protein 16 [Source:HGNC Symbol;Acc:5395]	AAA58683	ENSG00000163565	ILMN_1710937
374	4.34758	I	6	IFI16	interferon, gamma-inducible protein 16 [Source:HGNC Symbol;Acc:5395]	AAA58683	ENSG00000163565	ILMN_1710937
375	4.4015	I	6	IFI16	interferon, gamma-inducible protein 16 [Source:HGNC Symbol;Acc:5395]	AAA58683	ENSG00000163565	ILMN_1710937
376	3.00902	I	24	IFI16	interferon, gamma-inducible protein 16 [Source:HGNC Symbol;Acc:5395]	AAA58683	ENSG00000163565	ILMN_1710937
161	2.53523	I	6	IFI16	interferon, gamma-inducible protein 16 [Source:HGNC Symbol;Acc:5395]	AAA58683	ENSG00000163565	ILMN_1803457
143	2.09266	I	6	IFI16	interferon, gamma-inducible protein 16 [Source:HGNC Symbol;Acc:5395]	AAA58683	ENSG00000163565	7906400
201	2.51039	I	2	IFI16	interferon, gamma-inducible protein 16 [Source:HGNC Symbol;Acc:5395]	AAA58683	ENSG00000163565	7906400
307	11.0625	II	48	IFI16	interferon, gamma-inducible protein 16 [Source:HGNC Symbol;Acc:5395]	AAA58683	ENSG00000163565	7906400
308	4.27251	II	48	IFI16	interferon, gamma-inducible protein 16 [Source:HGNC Symbol;Acc:5395]	AAA58683	ENSG00000163565	7906400
53	17.0419	III	6	IFI6	interferon, alpha-inducible protein 6 [Source:HGNC Symbol;Acc:4054]	CAA26322	ENSG00000126709	A_23_P201459
59	14.7077	III	6	IFI6	interferon, alpha-inducible protein 6 [Source:HGNC Symbol;Acc:4054]	CAA26322	ENSG00000126709	A_23_P201459
118	13.7268	I	48	IFI6	interferon, alpha-inducible protein 6 [Source:HGNC Symbol;Acc:4054]	CAA26322	ENSG00000126709	A_23_P201459
125	16.209	I	3	IFI6	interferon, alpha-inducible protein 6 [Source:HGNC Symbol;Acc:4054]	CAA26322	ENSG00000126709	A_23_P201459
126	7.20502	II	24	IFI6	interferon, alpha-inducible protein 6 [Source:HGNC Symbol;Acc:4054]	CAA26322	ENSG00000126709	A_23_P201459
147	3.06204	I	4	IFI6	interferon, alpha-inducible protein 6 [Source:HGNC Symbol;Acc:4054]	CAA26322	ENSG00000126709	A_23_P201459
148	4.91695	I	6	IFI6	interferon, alpha-inducible protein 6 [Source:HGNC Symbol;Acc:4054]	CAA26322	ENSG00000126709	A_23_P201459
149	42.6978	I	24	IFI6	interferon, alpha-inducible protein 6 [Source:HGNC Symbol;Acc:4054]	CAA26322	ENSG00000126709	A_23_P201459
192	5.17421	I	6	IFI6	interferon, alpha-inducible protein 6 [Source:HGNC Symbol;Acc:4054]	CAA26322	ENSG00000126709	A_23_P201459
193	20.9849	I	12	IFI6	interferon, alpha-inducible protein 6 [Source:HGNC Symbol;Acc:4054]	CAA26322	ENSG00000126709	A_23_P201459
226	26.9639	I	6	IFI6	interferon, alpha-inducible protein 6 [Source:HGNC Symbol;Acc:4054]	CAA26322	ENSG00000126709	A_23_P201459
227	42.3642	I	12	IFI6	interferon, alpha-inducible protein 6 [Source:HGNC Symbol;Acc:4054]	CAA26322	ENSG00000126709	A_23_P201459
228	36.6848	I	18	IFI6	interferon, alpha-inducible protein 6 [Source:HGNC Symbol;Acc:4054]	CAA26322	ENSG00000126709	A_23_P201459
294	150.28	I	72	IFI6	interferon, alpha-inducible protein 6 [Source:HGNC Symbol;Acc:4054]	CAA26322	ENSG00000126709	A_23_P201459
318	3.4927	II	6	IFI6	interferon, alpha-inducible protein 6 [Source:HGNC Symbol;Acc:4054]	CAA26322	ENSG00000126709	A_23_P201459
12	5.09978	II	24	IFI6	interferon, alpha-inducible protein 6 [Source:HGNC Symbol;Acc:4054]	CAA26322	ENSG00000126709	204415_at
13	4.73055	II	6	IFI6	interferon, alpha-inducible protein 6 [Source:HGNC Symbol;Acc:4054]	CAA26322	ENSG00000126709	204415_at
14	15.4318	I	24	IFI6	interferon, alpha-inducible protein 6 [Source:HGNC Symbol;Acc:4054]	CAA26322	ENSG00000126709	204415_at
15	13.5416	I	6	IFI6	interferon, alpha-inducible protein 6 [Source:HGNC Symbol;Acc:4054]	CAA26322	ENSG00000126709	204415_at
20	32.2898	I	72	IFI6	interferon, alpha-inducible protein 6 [Source:HGNC Symbol;Acc:4054]	CAA26322	ENSG00000126709	204415_at
21	106.016	I	18	IFI6	interferon, alpha-inducible protein 6 [Source:HGNC Symbol;Acc:4054]	CAA26322	ENSG00000126709	204415_at
22	115.627	I	12	IFI6	interferon, alpha-inducible protein 6 [Source:HGNC Symbol;Acc:4054]	CAA26322	ENSG00000126709	204415_at
23	54.7675	I	8	IFI6	interferon, alpha-inducible protein 6 [Source:HGNC Symbol;Acc:4054]	CAA26322	ENSG00000126709	204415_at
24	41.0637	I	6	IFI6	interferon, alpha-inducible protein 6 [Source:HGNC Symbol;Acc:4054]	CAA26322	ENSG00000126709	204415_at
25	18.7317	I	4	IFI6	interferon, alpha-inducible protein 6 [Source:HGNC Symbol;Acc:4054]	CAA26322	ENSG00000126709	204415_at
26	7.16967	I	2	IFI6	interferon, alpha-inducible protein 6 [Source:HGNC Symbol;Acc:4054]	CAA26322	ENSG00000126709	204415_at
38	28.555	I	5	IFI6	interferon, alpha-inducible protein 6 [Source:HGNC Symbol;Acc:4054]	CAA26322	ENSG00000126709	204415_at
41	62.8339	I	5	IFI6	interferon, alpha-inducible protein 6 [Source:HGNC Symbol;Acc:4054]	CAA26322	ENSG00000126709	204415_at
43	9.52329	I	12	IFI6	interferon, alpha-inducible protein 6 [Source:HGNC Symbol;Acc:4054]	CAA26322	ENSG00000126709	204415_at
44	7.16347	I	6	IFI6	interferon, alpha-inducible protein 6 [Source:HGNC Symbol;Acc:4054]	CAA26322	ENSG00000126709	204415_at
45	6.95365	I	12	IFI6	interferon, alpha-inducible protein 6 [Source:HGNC Symbol;Acc:4054]	CAA26322	ENSG00000126709	204415_at
46	4.38331	I	6	IFI6	interferon, alpha-inducible protein 6 [Source:HGNC Symbol;Acc:4054]	CAA26322	ENSG00000126709	204415_at
47	4.21774	I	5	IFI6	interferon, alpha-inducible protein 6 [Source:HGNC Symbol;Acc:4054]	CAA26322	ENSG00000126709	204415_at
48	4.28485	I	5	IFI6	interferon, alpha-inducible protein 6 [Source:HGNC Symbol;Acc:4054]	CAA26322	ENSG00000126709	204415_at
60	17.3079	I	24	IFI6	interferon, alpha-inducible protein 6 [Source:HGNC Symbol;Acc:4054]	CAA26322	ENSG00000126709	204415_at
61	9.62354	I	72	IFI6	interferon, alpha-inducible protein 6 [Source:HGNC Symbol;Acc:4054]	CAA26322	ENSG00000126709	204415_at
68	2.45358	II	96	IFI6	interferon, alpha-inducible protein 6 [Source:HGNC Symbol;Acc:4054]	CAA26322	ENSG00000126709	204415_at
159	2.4183	I	48	IFI6	interferon, alpha-inducible protein 6 [Source:HGNC Symbol;Acc:4054]	CAA26322	ENSG00000126709	204415_at
177	17.9864	I	48	IFI6	interferon, alpha-inducible protein 6 [Source:HGNC Symbol;Acc:4054]	CAA26322	ENSG00000126709	204415_at
178	7.63223	I	48	IFI6	interferon, alpha-inducible protein 6 [Source:HGNC Symbol;Acc:4054]	CAA26322	ENSG00000126709	204415_at
179	8.01299	I	48	IFI6	interferon, alpha-inducible protein 6 [Source:HGNC Symbol;Acc:4054]	CAA26322	ENSG00000126709	204415_at
183	2.7545	II	24	IFI6	interferon, alpha-inducible protein 6 [Source:HGNC Symbol;Acc:4054]	CAA26322	ENSG00000126709	204415_at
186	9.93575	I	48	IFI6	interferon, alpha-inducible protein 6 [Source:HGNC Symbol;Acc:4054]	CAA26322	ENSG00000126709	204415_at
187	8.6637	I	96	IFI6	interferon, alpha-inducible protein 6 [Source:HGNC Symbol;Acc:4054]	CAA26322	ENSG00000126709	204415_at
295	2.81077	II	24	IFI6	interferon, alpha-inducible protein 6 [Source:HGNC Symbol;Acc:4054]	CAA26322	ENSG00000126709	204415_at
298	14.3156	II	24	IFI6	interferon, alpha-inducible protein 6 [Source:HGNC Symbol;Acc:4054]	CAA26322	ENSG00000126709	204415_at
300	11.3186	I	6	IFI6	interferon, alpha-inducible protein 6 [Source:HGNC Symbol;Acc:4054]	CAA26322	ENSG00000126709	204415_at
305	2.19012	II	1.5	IFI6	interferon, alpha-inducible protein 6 [Source:HGNC Symbol;Acc:4054]	CAA26322	ENSG00000126709	204415_at
306	3.72499	I	1.5	IFI6	interferon, alpha-inducible protein 6 [Source:HGNC Symbol;Acc:4054]	CAA26322	ENSG00000126709	204415_at
74	7.59896	I	16	IFI6	interferon, alpha-inducible protein 6 [Source:HGNC Symbol;Acc:4054]	CAA26322	ENSG00000126709	ILMN_2347798
75	51.7867	I	16	IFI6	interferon, alpha-inducible protein 6 [Source:HGNC Symbol;Acc:4054]	CAA26322	ENSG00000126709	ILMN_2347798
78	41.4528	I	12	IFI6	interferon, alpha-inducible protein 6 [Source:HGNC Symbol;Acc:4054]	CAA26322	ENSG00000126709	ILMN_2347798
79	68.4386	I	24	IFI6	interferon, alpha-inducible protein 6 [Source:HGNC Symbol;Acc:4054]	CAA26322	ENSG00000126709	ILMN_2347798
80	102.898	I	48	IFI6	interferon, alpha-inducible protein 6 [Source:HGNC Symbol;Acc:4054]	CAA26322	ENSG00000126709	ILMN_2347798
81	8.5512	I	4	IFI6	interferon, alpha-inducible protein 6 [Source:HGNC Symbol;Acc:4054]	CAA26322	ENSG00000126709	ILMN_2347798
82	4.21417	II	12	IFI6	interferon, alpha-inducible protein 6 [Source:HGNC Symbol;Acc:4054]	CAA26322	ENSG00000126709	ILMN_2347798
83	8.66532	II	24	IFI6	interferon, alpha-inducible protein 6 [Source:HGNC Symbol;Acc:4054]	CAA26322	ENSG00000126709	ILMN_2347798
85	21.9249	II	48	IFI6	interferon, alpha-inducible protein 6 [Source:HGNC Symbol;Acc:4054]	CAA26322	ENSG00000126709	ILMN_2347798
128	8.81564	II	10	IFI6	interferon, alpha-inducible protein 6 [Source:HGNC Symbol;Acc:4054]	CAA26322	ENSG00000126709	ILMN_2347798
129	22.5108	I	10	IFI6	interferon, alpha-inducible protein 6 [Source:HGNC Symbol;Acc:4054]	CAA26322	ENSG00000126709	ILMN_2347798
130	22.2699	I	10	IFI6	interferon, alpha-inducible protein 6 [Source:HGNC Symbol;Acc:4054]	CAA26322	ENSG00000126709	ILMN_2347798
131	9.16132	II	10	IFI6	interferon, alpha-inducible protein 6 [Source:HGNC Symbol;Acc:4054]	CAA26322	ENSG00000126709	ILMN_2347798
160	35.8167	I	18	IFI6	interferon, alpha-inducible protein 6 [Source:HGNC Symbol;Acc:4054]	CAA26322	ENSG00000126709	ILMN_2347798
200	20.9642	I	10	IFI6	interferon, alpha-inducible protein 6 [Source:HGNC Symbol;Acc:4054]	CAA26322	ENSG00000126709	ILMN_2347798
249	46.1702	I	12	IFI6	interferon, alpha-inducible protein 6 [Source:HGNC Symbol;Acc:4054]	CAA26322	ENSG00000126709	ILMN_2347798
250	3.50808	I	2	IFI6	interferon, alpha-inducible protein 6 [Source:HGNC Symbol;Acc:4054]	CAA26322	ENSG00000126709	ILMN_2347798
251	82.479	I	24	IFI6	interferon, alpha-inducible protein 6 [Source:HGNC Symbol;Acc:4054]	CAA26322	ENSG00000126709	ILMN_2347798
253	11.1709	I	4	IFI6	interferon, alpha-inducible protein 6 [Source:HGNC Symbol;Acc:4054]	CAA26322	ENSG00000126709	ILMN_2347798
254	22.0688	I	6	IFI6	interferon, alpha-inducible protein 6 [Source:HGNC Symbol;Acc:4054]	CAA26322	ENSG00000126709	ILMN_2347798
255	5.32827	III	6	IFI6	interferon, alpha-inducible protein 6 [Source:HGNC Symbol;Acc:4054]	CAA26322	ENSG00000126709	ILMN_2347798
257	17.3809	III	12	IFI6	interferon, alpha-inducible protein 6 [Source:HGNC Symbol;Acc:4054]	CAA26322	ENSG00000126709	ILMN_2347798
260	3.30335	III	4	IFI6	interferon, alpha-inducible protein 6 [Source:HGNC Symbol;Acc:4054]	CAA26322	ENSG00000126709	ILMN_2347798
261	6.23427	III	6	IFI6	interferon, alpha-inducible protein 6 [Source:HGNC Symbol;Acc:4054]	CAA26322	ENSG00000126709	ILMN_2347798
263	11.7463	III	12	IFI6	interferon, alpha-inducible protein 6 [Source:HGNC Symbol;Acc:4054]	CAA26322	ENSG00000126709	ILMN_2347798
265	21.5385	III	24	IFI6	interferon, alpha-inducible protein 6 [Source:HGNC Symbol;Acc:4054]	CAA26322	ENSG00000126709	ILMN_2347798
266	2.46665	III	4	IFI6	interferon, alpha-inducible protein 6 [Source:HGNC Symbol;Acc:4054]	CAA26322	ENSG00000126709	ILMN_2347798
267	4.1608	III	6	IFI6	interferon, alpha-inducible protein 6 [Source:HGNC Symbol;Acc:4054]	CAA26322	ENSG00000126709	ILMN_2347798
269	13.7939	III	12	IFI6	interferon, alpha-inducible protein 6 [Source:HGNC Symbol;Acc:4054]	CAA26322	ENSG00000126709	ILMN_2347798
271	27.4798	III	24	IFI6	interferon, alpha-inducible protein 6 [Source:HGNC Symbol;Acc:4054]	CAA26322	ENSG00000126709	ILMN_2347798
275	34.6166	I	8	IFI6	interferon, alpha-inducible protein 6 [Source:HGNC Symbol;Acc:4054]	CAA26322	ENSG00000126709	ILMN_2347798
276	10.7185	I	2	IFI6	interferon, alpha-inducible protein 6 [Source:HGNC Symbol;Acc:4054]	CAA26322	ENSG00000126709	ILMN_2347798
277	34.4411	I	8	IFI6	interferon, alpha-inducible protein 6 [Source:HGNC Symbol;Acc:4054]	CAA26322	ENSG00000126709	ILMN_2347798
278	10.1433	I	2	IFI6	interferon, alpha-inducible protein 6 [Source:HGNC Symbol;Acc:4054]	CAA26322	ENSG00000126709	ILMN_2347798
279	21.8179	I	48	IFI6	interferon, alpha-inducible protein 6 [Source:HGNC Symbol;Acc:4054]	CAA26322	ENSG00000126709	ILMN_2347798
280	11.9581	I	48	IFI6	interferon, alpha-inducible protein 6 [Source:HGNC Symbol;Acc:4054]	CAA26322	ENSG00000126709	ILMN_2347798
281	19.2344	I	48	IFI6	interferon, alpha-inducible protein 6 [Source:HGNC Symbol;Acc:4054]	CAA26322	ENSG00000126709	ILMN_2347798
284	2.06036	II	6	IFI6	interferon, alpha-inducible protein 6 [Source:HGNC Symbol;Acc:4054]	CAA26322	ENSG00000126709	ILMN_2347798
285	2.17845	II	6	IFI6	interferon, alpha-inducible protein 6 [Source:HGNC Symbol;Acc:4054]	CAA26322	ENSG00000126709	ILMN_2347798
347	19.1792	I	6	IFI6	interferon, alpha-inducible protein 6 [Source:HGNC Symbol;Acc:4054]	CAA26322	ENSG00000126709	ILMN_2347798
348	10.1491	I	4	IFI6	interferon, alpha-inducible protein 6 [Source:HGNC Symbol;Acc:4054]	CAA26322	ENSG00000126709	ILMN_2347798
350	3.07916	I	2	IFI6	interferon, alpha-inducible protein 6 [Source:HGNC Symbol;Acc:4054]	CAA26322	ENSG00000126709	ILMN_2347798
352	34.0547	I	12	IFI6	interferon, alpha-inducible protein 6 [Source:HGNC Symbol;Acc:4054]	CAA26322	ENSG00000126709	ILMN_2347798
353	44.4256	I	24	IFI6	interferon, alpha-inducible protein 6 [Source:HGNC Symbol;Acc:4054]	CAA26322	ENSG00000126709	ILMN_2347798
354	19.727	I	48	IFI6	interferon, alpha-inducible protein 6 [Source:HGNC Symbol;Acc:4054]	CAA26322	ENSG00000126709	ILMN_2347798
356	21.6577	I	24	IFI6	interferon, alpha-inducible protein 6 [Source:HGNC Symbol;Acc:4054]	CAA26322	ENSG00000126709	ILMN_2347798
358	18.591	I	12	IFI6	interferon, alpha-inducible protein 6 [Source:HGNC Symbol;Acc:4054]	CAA26322	ENSG00000126709	ILMN_2347798
362	13.4209	I	6	IFI6	interferon, alpha-inducible protein 6 [Source:HGNC Symbol;Acc:4054]	CAA26322	ENSG00000126709	ILMN_2347798
366	12.6923	I	96	IFI6	interferon, alpha-inducible protein 6 [Source:HGNC Symbol;Acc:4054]	CAA26322	ENSG00000126709	ILMN_2347798
373	66.6477	I	24	IFI6	interferon, alpha-inducible protein 6 [Source:HGNC Symbol;Acc:4054]	CAA26322	ENSG00000126709	ILMN_2347798
374	24.6597	I	6	IFI6	interferon, alpha-inducible protein 6 [Source:HGNC Symbol;Acc:4054]	CAA26322	ENSG00000126709	ILMN_2347798
375	25.7391	I	6	IFI6	interferon, alpha-inducible protein 6 [Source:HGNC Symbol;Acc:4054]	CAA26322	ENSG00000126709	ILMN_2347798
376	48.2262	I	24	IFI6	interferon, alpha-inducible protein 6 [Source:HGNC Symbol;Acc:4054]	CAA26322	ENSG00000126709	ILMN_2347798
75	15.7491	I	16	IFI6	interferon, alpha-inducible protein 6 [Source:HGNC Symbol;Acc:4054]	CAA26322	ENSG00000126709	ILMN_1687384
78	15.9835	I	12	IFI6	interferon, alpha-inducible protein 6 [Source:HGNC Symbol;Acc:4054]	CAA26322	ENSG00000126709	ILMN_1687384
79	24.1875	I	24	IFI6	interferon, alpha-inducible protein 6 [Source:HGNC Symbol;Acc:4054]	CAA26322	ENSG00000126709	ILMN_1687384
80	35.1366	I	48	IFI6	interferon, alpha-inducible protein 6 [Source:HGNC Symbol;Acc:4054]	CAA26322	ENSG00000126709	ILMN_1687384
81	6.5968	I	4	IFI6	interferon, alpha-inducible protein 6 [Source:HGNC Symbol;Acc:4054]	CAA26322	ENSG00000126709	ILMN_1687384
82	4.24381	II	12	IFI6	interferon, alpha-inducible protein 6 [Source:HGNC Symbol;Acc:4054]	CAA26322	ENSG00000126709	ILMN_1687384
83	6.05536	II	24	IFI6	interferon, alpha-inducible protein 6 [Source:HGNC Symbol;Acc:4054]	CAA26322	ENSG00000126709	ILMN_1687384
85	16.8953	II	48	IFI6	interferon, alpha-inducible protein 6 [Source:HGNC Symbol;Acc:4054]	CAA26322	ENSG00000126709	ILMN_1687384
128	4.41734	II	10	IFI6	interferon, alpha-inducible protein 6 [Source:HGNC Symbol;Acc:4054]	CAA26322	ENSG00000126709	ILMN_1687384
129	8.60459	I	10	IFI6	interferon, alpha-inducible protein 6 [Source:HGNC Symbol;Acc:4054]	CAA26322	ENSG00000126709	ILMN_1687384
130	6.79245	I	10	IFI6	interferon, alpha-inducible protein 6 [Source:HGNC Symbol;Acc:4054]	CAA26322	ENSG00000126709	ILMN_1687384
131	5.40069	II	10	IFI6	interferon, alpha-inducible protein 6 [Source:HGNC Symbol;Acc:4054]	CAA26322	ENSG00000126709	ILMN_1687384
160	13.5211	I	18	IFI6	interferon, alpha-inducible protein 6 [Source:HGNC Symbol;Acc:4054]	CAA26322	ENSG00000126709	ILMN_1687384
200	10.3247	I	10	IFI6	interferon, alpha-inducible protein 6 [Source:HGNC Symbol;Acc:4054]	CAA26322	ENSG00000126709	ILMN_1687384
248	3.47453	I	1	IFI6	interferon, alpha-inducible protein 6 [Source:HGNC Symbol;Acc:4054]	CAA26322	ENSG00000126709	ILMN_1687384
250	3.85096	I	2	IFI6	interferon, alpha-inducible protein 6 [Source:HGNC Symbol;Acc:4054]	CAA26322	ENSG00000126709	ILMN_1687384
253	2.09514	I	4	IFI6	interferon, alpha-inducible protein 6 [Source:HGNC Symbol;Acc:4054]	CAA26322	ENSG00000126709	ILMN_1687384
254	2.56579	I	6	IFI6	interferon, alpha-inducible protein 6 [Source:HGNC Symbol;Acc:4054]	CAA26322	ENSG00000126709	ILMN_1687384
255	3.8236	III	6	IFI6	interferon, alpha-inducible protein 6 [Source:HGNC Symbol;Acc:4054]	CAA26322	ENSG00000126709	ILMN_1687384
257	3.83595	III	12	IFI6	interferon, alpha-inducible protein 6 [Source:HGNC Symbol;Acc:4054]	CAA26322	ENSG00000126709	ILMN_1687384
258	2.74976	III	2	IFI6	interferon, alpha-inducible protein 6 [Source:HGNC Symbol;Acc:4054]	CAA26322	ENSG00000126709	ILMN_1687384
260	3.62992	III	4	IFI6	interferon, alpha-inducible protein 6 [Source:HGNC Symbol;Acc:4054]	CAA26322	ENSG00000126709	ILMN_1687384
261	3.54703	III	6	IFI6	interferon, alpha-inducible protein 6 [Source:HGNC Symbol;Acc:4054]	CAA26322	ENSG00000126709	ILMN_1687384
263	3.86877	III	12	IFI6	interferon, alpha-inducible protein 6 [Source:HGNC Symbol;Acc:4054]	CAA26322	ENSG00000126709	ILMN_1687384
264	2.13983	III	2	IFI6	interferon, alpha-inducible protein 6 [Source:HGNC Symbol;Acc:4054]	CAA26322	ENSG00000126709	ILMN_1687384
265	5.8014	III	24	IFI6	interferon, alpha-inducible protein 6 [Source:HGNC Symbol;Acc:4054]	CAA26322	ENSG00000126709	ILMN_1687384
266	3.03686	III	4	IFI6	interferon, alpha-inducible protein 6 [Source:HGNC Symbol;Acc:4054]	CAA26322	ENSG00000126709	ILMN_1687384
267	3.78682	III	6	IFI6	interferon, alpha-inducible protein 6 [Source:HGNC Symbol;Acc:4054]	CAA26322	ENSG00000126709	ILMN_1687384
269	3.18423	III	12	IFI6	interferon, alpha-inducible protein 6 [Source:HGNC Symbol;Acc:4054]	CAA26322	ENSG00000126709	ILMN_1687384
270	2.44103	III	2	IFI6	interferon, alpha-inducible protein 6 [Source:HGNC Symbol;Acc:4054]	CAA26322	ENSG00000126709	ILMN_1687384
271	5.1236	III	24	IFI6	interferon, alpha-inducible protein 6 [Source:HGNC Symbol;Acc:4054]	CAA26322	ENSG00000126709	ILMN_1687384
273	2.70491	III	4	IFI6	interferon, alpha-inducible protein 6 [Source:HGNC Symbol;Acc:4054]	CAA26322	ENSG00000126709	ILMN_1687384
275	6.6886	I	8	IFI6	interferon, alpha-inducible protein 6 [Source:HGNC Symbol;Acc:4054]	CAA26322	ENSG00000126709	ILMN_1687384
277	5.71575	I	8	IFI6	interferon, alpha-inducible protein 6 [Source:HGNC Symbol;Acc:4054]	CAA26322	ENSG00000126709	ILMN_1687384
278	2.97772	I	2	IFI6	interferon, alpha-inducible protein 6 [Source:HGNC Symbol;Acc:4054]	CAA26322	ENSG00000126709	ILMN_1687384
279	14.613	I	48	IFI6	interferon, alpha-inducible protein 6 [Source:HGNC Symbol;Acc:4054]	CAA26322	ENSG00000126709	ILMN_1687384
280	7.32844	I	48	IFI6	interferon, alpha-inducible protein 6 [Source:HGNC Symbol;Acc:4054]	CAA26322	ENSG00000126709	ILMN_1687384
281	12.6242	I	48	IFI6	interferon, alpha-inducible protein 6 [Source:HGNC Symbol;Acc:4054]	CAA26322	ENSG00000126709	ILMN_1687384
350	3.57694	I	2	IFI6	interferon, alpha-inducible protein 6 [Source:HGNC Symbol;Acc:4054]	CAA26322	ENSG00000126709	ILMN_1687384
351	3.25521	I	1	IFI6	interferon, alpha-inducible protein 6 [Source:HGNC Symbol;Acc:4054]	CAA26322	ENSG00000126709	ILMN_1687384
352	2.96481	I	12	IFI6	interferon, alpha-inducible protein 6 [Source:HGNC Symbol;Acc:4054]	CAA26322	ENSG00000126709	ILMN_1687384
354	14.5743	I	48	IFI6	interferon, alpha-inducible protein 6 [Source:HGNC Symbol;Acc:4054]	CAA26322	ENSG00000126709	ILMN_1687384
356	13.3907	I	24	IFI6	interferon, alpha-inducible protein 6 [Source:HGNC Symbol;Acc:4054]	CAA26322	ENSG00000126709	ILMN_1687384
358	10.7731	I	12	IFI6	interferon, alpha-inducible protein 6 [Source:HGNC Symbol;Acc:4054]	CAA26322	ENSG00000126709	ILMN_1687384
360	2.42831	I	3	IFI6	interferon, alpha-inducible protein 6 [Source:HGNC Symbol;Acc:4054]	CAA26322	ENSG00000126709	ILMN_1687384
362	8.06323	I	6	IFI6	interferon, alpha-inducible protein 6 [Source:HGNC Symbol;Acc:4054]	CAA26322	ENSG00000126709	ILMN_1687384
366	11.9008	I	96	IFI6	interferon, alpha-inducible protein 6 [Source:HGNC Symbol;Acc:4054]	CAA26322	ENSG00000126709	ILMN_1687384
373	35.8768	I	24	IFI6	interferon, alpha-inducible protein 6 [Source:HGNC Symbol;Acc:4054]	CAA26322	ENSG00000126709	ILMN_1687384
374	9.13195	I	6	IFI6	interferon, alpha-inducible protein 6 [Source:HGNC Symbol;Acc:4054]	CAA26322	ENSG00000126709	ILMN_1687384
375	8.75097	I	6	IFI6	interferon, alpha-inducible protein 6 [Source:HGNC Symbol;Acc:4054]	CAA26322	ENSG00000126709	ILMN_1687384
376	18.6352	I	24	IFI6	interferon, alpha-inducible protein 6 [Source:HGNC Symbol;Acc:4054]	CAA26322	ENSG00000126709	ILMN_1687384
87	2.17925	II	12	IFI6	interferon, alpha-inducible protein 6 [Source:HGNC Symbol;Acc:4054]	CAA26322	ENSG00000126709	7914127
88	2.48607	II	24	IFI6	interferon, alpha-inducible protein 6 [Source:HGNC Symbol;Acc:4054]	CAA26322	ENSG00000126709	7914127
119	4.09885	I	120	IFI6	interferon, alpha-inducible protein 6 [Source:HGNC Symbol;Acc:4054]	CAA26322	ENSG00000126709	7914127
121	3.1375	I	120	IFI6	interferon, alpha-inducible protein 6 [Source:HGNC Symbol;Acc:4054]	CAA26322	ENSG00000126709	7914127
122	3.73607	I	120	IFI6	interferon, alpha-inducible protein 6 [Source:HGNC Symbol;Acc:4054]	CAA26322	ENSG00000126709	7914127
142	6.52436	I	6	IFI6	interferon, alpha-inducible protein 6 [Source:HGNC Symbol;Acc:4054]	CAA26322	ENSG00000126709	7914127
143	12.7976	I	6	IFI6	interferon, alpha-inducible protein 6 [Source:HGNC Symbol;Acc:4054]	CAA26322	ENSG00000126709	7914127
201	3.24415	I	2	IFI6	interferon, alpha-inducible protein 6 [Source:HGNC Symbol;Acc:4054]	CAA26322	ENSG00000126709	7914127
202	5.17054	I	6	IFI6	interferon, alpha-inducible protein 6 [Source:HGNC Symbol;Acc:4054]	CAA26322	ENSG00000126709	7914127
203	3.17745	I	18	IFI6	interferon, alpha-inducible protein 6 [Source:HGNC Symbol;Acc:4054]	CAA26322	ENSG00000126709	7914127
53	13.03	III	6	IFIH1	interferon induced with helicase C domain 1 [Source:HGNC Symbol;Acc:18873]	AAX93137	ENSG00000115267	A_23_P68155
59	11.1444	III	6	IFIH1	interferon induced with helicase C domain 1 [Source:HGNC Symbol;Acc:18873]	AAX93137	ENSG00000115267	A_23_P68155
125	17.5296	I	3	IFIH1	interferon induced with helicase C domain 1 [Source:HGNC Symbol;Acc:18873]	AAX93137	ENSG00000115267	A_23_P68155
126	8.2143	II	24	IFIH1	interferon induced with helicase C domain 1 [Source:HGNC Symbol;Acc:18873]	AAX93137	ENSG00000115267	A_23_P68155
147	23.4236	I	4	IFIH1	interferon induced with helicase C domain 1 [Source:HGNC Symbol;Acc:18873]	AAX93137	ENSG00000115267	A_23_P68155
148	5.9531	I	6	IFIH1	interferon induced with helicase C domain 1 [Source:HGNC Symbol;Acc:18873]	AAX93137	ENSG00000115267	A_23_P68155
149	26.3036	I	24	IFIH1	interferon induced with helicase C domain 1 [Source:HGNC Symbol;Acc:18873]	AAX93137	ENSG00000115267	A_23_P68155
173	3.14465	II	20	IFIH1	interferon induced with helicase C domain 1 [Source:HGNC Symbol;Acc:18873]	AAX93137	ENSG00000115267	A_23_P68155
174	3.80669	II	20	IFIH1	interferon induced with helicase C domain 1 [Source:HGNC Symbol;Acc:18873]	AAX93137	ENSG00000115267	A_23_P68155
192	6.39263	I	6	IFIH1	interferon induced with helicase C domain 1 [Source:HGNC Symbol;Acc:18873]	AAX93137	ENSG00000115267	A_23_P68155
193	6.21534	I	12	IFIH1	interferon induced with helicase C domain 1 [Source:HGNC Symbol;Acc:18873]	AAX93137	ENSG00000115267	A_23_P68155
226	21.2643	I	6	IFIH1	interferon induced with helicase C domain 1 [Source:HGNC Symbol;Acc:18873]	AAX93137	ENSG00000115267	A_23_P68155
227	10.5106	I	12	IFIH1	interferon induced with helicase C domain 1 [Source:HGNC Symbol;Acc:18873]	AAX93137	ENSG00000115267	A_23_P68155
228	11.4539	I	18	IFIH1	interferon induced with helicase C domain 1 [Source:HGNC Symbol;Acc:18873]	AAX93137	ENSG00000115267	A_23_P68155
293	45.8787	II	24	IFIH1	interferon induced with helicase C domain 1 [Source:HGNC Symbol;Acc:18873]	AAX93137	ENSG00000115267	A_23_P68155
294	113.15	I	72	IFIH1	interferon induced with helicase C domain 1 [Source:HGNC Symbol;Acc:18873]	AAX93137	ENSG00000115267	A_23_P68155
318	3.69502	II	6	IFIH1	interferon induced with helicase C domain 1 [Source:HGNC Symbol;Acc:18873]	AAX93137	ENSG00000115267	A_23_P68155
319	4.48399	II	18	IFIH1	interferon induced with helicase C domain 1 [Source:HGNC Symbol;Acc:18873]	AAX93137	ENSG00000115267	A_23_P68155
12	37.8085	II	24	IFIH1	interferon induced with helicase C domain 1 [Source:HGNC Symbol;Acc:18873]	AAX93137	ENSG00000115267	219209_at
13	8.96623	II	6	IFIH1	interferon induced with helicase C domain 1 [Source:HGNC Symbol;Acc:18873]	AAX93137	ENSG00000115267	219209_at
14	46.8683	I	24	IFIH1	interferon induced with helicase C domain 1 [Source:HGNC Symbol;Acc:18873]	AAX93137	ENSG00000115267	219209_at
15	31.3265	I	6	IFIH1	interferon induced with helicase C domain 1 [Source:HGNC Symbol;Acc:18873]	AAX93137	ENSG00000115267	219209_at
20	7.18228	I	72	IFIH1	interferon induced with helicase C domain 1 [Source:HGNC Symbol;Acc:18873]	AAX93137	ENSG00000115267	219209_at
21	31.1616	I	18	IFIH1	interferon induced with helicase C domain 1 [Source:HGNC Symbol;Acc:18873]	AAX93137	ENSG00000115267	219209_at
22	37.8736	I	12	IFIH1	interferon induced with helicase C domain 1 [Source:HGNC Symbol;Acc:18873]	AAX93137	ENSG00000115267	219209_at
23	43.5463	I	8	IFIH1	interferon induced with helicase C domain 1 [Source:HGNC Symbol;Acc:18873]	AAX93137	ENSG00000115267	219209_at
24	29.0117	I	6	IFIH1	interferon induced with helicase C domain 1 [Source:HGNC Symbol;Acc:18873]	AAX93137	ENSG00000115267	219209_at
25	25.5958	I	4	IFIH1	interferon induced with helicase C domain 1 [Source:HGNC Symbol;Acc:18873]	AAX93137	ENSG00000115267	219209_at
26	5.80724	I	2	IFIH1	interferon induced with helicase C domain 1 [Source:HGNC Symbol;Acc:18873]	AAX93137	ENSG00000115267	219209_at
39	6.44246	II	5	IFIH1	interferon induced with helicase C domain 1 [Source:HGNC Symbol;Acc:18873]	AAX93137	ENSG00000115267	219209_at
40	42.6696	I	5	IFIH1	interferon induced with helicase C domain 1 [Source:HGNC Symbol;Acc:18873]	AAX93137	ENSG00000115267	219209_at
41	44.3575	I	5	IFIH1	interferon induced with helicase C domain 1 [Source:HGNC Symbol;Acc:18873]	AAX93137	ENSG00000115267	219209_at
44	18.2677	I	6	IFIH1	interferon induced with helicase C domain 1 [Source:HGNC Symbol;Acc:18873]	AAX93137	ENSG00000115267	219209_at
47	23.9224	I	5	IFIH1	interferon induced with helicase C domain 1 [Source:HGNC Symbol;Acc:18873]	AAX93137	ENSG00000115267	219209_at
48	29.4969	I	5	IFIH1	interferon induced with helicase C domain 1 [Source:HGNC Symbol;Acc:18873]	AAX93137	ENSG00000115267	219209_at
60	7.39742	I	24	IFIH1	interferon induced with helicase C domain 1 [Source:HGNC Symbol;Acc:18873]	AAX93137	ENSG00000115267	219209_at
61	7.06944	I	72	IFIH1	interferon induced with helicase C domain 1 [Source:HGNC Symbol;Acc:18873]	AAX93137	ENSG00000115267	219209_at
63	3.6833	II	6	IFIH1	interferon induced with helicase C domain 1 [Source:HGNC Symbol;Acc:18873]	AAX93137	ENSG00000115267	219209_at
64	3.97093	II	24	IFIH1	interferon induced with helicase C domain 1 [Source:HGNC Symbol;Acc:18873]	AAX93137	ENSG00000115267	219209_at
67	4.41907	I	6	IFIH1	interferon induced with helicase C domain 1 [Source:HGNC Symbol;Acc:18873]	AAX93137	ENSG00000115267	219209_at
177	7.08852	I	48	IFIH1	interferon induced with helicase C domain 1 [Source:HGNC Symbol;Acc:18873]	AAX93137	ENSG00000115267	219209_at
178	3.10893	I	48	IFIH1	interferon induced with helicase C domain 1 [Source:HGNC Symbol;Acc:18873]	AAX93137	ENSG00000115267	219209_at
179	2.97428	I	48	IFIH1	interferon induced with helicase C domain 1 [Source:HGNC Symbol;Acc:18873]	AAX93137	ENSG00000115267	219209_at
183	3.46364	II	24	IFIH1	interferon induced with helicase C domain 1 [Source:HGNC Symbol;Acc:18873]	AAX93137	ENSG00000115267	219209_at
184	2.80174	II	24	IFIH1	interferon induced with helicase C domain 1 [Source:HGNC Symbol;Acc:18873]	AAX93137	ENSG00000115267	219209_at
185	3.90833	I	16	IFIH1	interferon induced with helicase C domain 1 [Source:HGNC Symbol;Acc:18873]	AAX93137	ENSG00000115267	219209_at
186	3.56795	I	48	IFIH1	interferon induced with helicase C domain 1 [Source:HGNC Symbol;Acc:18873]	AAX93137	ENSG00000115267	219209_at
295	5.58719	II	24	IFIH1	interferon induced with helicase C domain 1 [Source:HGNC Symbol;Acc:18873]	AAX93137	ENSG00000115267	219209_at
298	43.8972	II	24	IFIH1	interferon induced with helicase C domain 1 [Source:HGNC Symbol;Acc:18873]	AAX93137	ENSG00000115267	219209_at
300	2.40426	I	6	IFIH1	interferon induced with helicase C domain 1 [Source:HGNC Symbol;Acc:18873]	AAX93137	ENSG00000115267	219209_at
305	4.31818	II	1.5	IFIH1	interferon induced with helicase C domain 1 [Source:HGNC Symbol;Acc:18873]	AAX93137	ENSG00000115267	219209_at
306	10.9355	I	1.5	IFIH1	interferon induced with helicase C domain 1 [Source:HGNC Symbol;Acc:18873]	AAX93137	ENSG00000115267	219209_at
311	4.05772	II	24	IFIH1	interferon induced with helicase C domain 1 [Source:HGNC Symbol;Acc:18873]	AAX93137	ENSG00000115267	219209_at
313	3.05204	II	72	IFIH1	interferon induced with helicase C domain 1 [Source:HGNC Symbol;Acc:18873]	AAX93137	ENSG00000115267	219209_at
15	8.49767	I	6	IFIH1	interferon induced with helicase C domain 1 [Source:HGNC Symbol;Acc:18873]	AAX93137	ENSG00000115267	216020_at
41	4.7076	I	5	IFIH1	interferon induced with helicase C domain 1 [Source:HGNC Symbol;Acc:18873]	AAX93137	ENSG00000115267	216020_at
47	3.97515	I	5	IFIH1	interferon induced with helicase C domain 1 [Source:HGNC Symbol;Acc:18873]	AAX93137	ENSG00000115267	216020_at
63	4.84547	II	6	IFIH1	interferon induced with helicase C domain 1 [Source:HGNC Symbol;Acc:18873]	AAX93137	ENSG00000115267	216020_at
67	2.22898	I	6	IFIH1	interferon induced with helicase C domain 1 [Source:HGNC Symbol;Acc:18873]	AAX93137	ENSG00000115267	216020_at
144	3.71405	II	24	IFIH1	interferon induced with helicase C domain 1 [Source:HGNC Symbol;Acc:18873]	AAX93137	ENSG00000115267	216020_at
178	2.14697	I	48	IFIH1	interferon induced with helicase C domain 1 [Source:HGNC Symbol;Acc:18873]	AAX93137	ENSG00000115267	216020_at
179	2.07809	I	48	IFIH1	interferon induced with helicase C domain 1 [Source:HGNC Symbol;Acc:18873]	AAX93137	ENSG00000115267	216020_at
185	2.50225	I	16	IFIH1	interferon induced with helicase C domain 1 [Source:HGNC Symbol;Acc:18873]	AAX93137	ENSG00000115267	216020_at
300	4.37247	I	6	IFIH1	interferon induced with helicase C domain 1 [Source:HGNC Symbol;Acc:18873]	AAX93137	ENSG00000115267	216020_at
305	5.6095	II	1.5	IFIH1	interferon induced with helicase C domain 1 [Source:HGNC Symbol;Acc:18873]	AAX93137	ENSG00000115267	216020_at
306	14.1283	I	1.5	IFIH1	interferon induced with helicase C domain 1 [Source:HGNC Symbol;Acc:18873]	AAX93137	ENSG00000115267	216020_at
311	3.15835	II	24	IFIH1	interferon induced with helicase C domain 1 [Source:HGNC Symbol;Acc:18873]	AAX93137	ENSG00000115267	216020_at
47	12.2923	I	5	IFIH1	interferon induced with helicase C domain 1 [Source:HGNC Symbol;Acc:18873]	AAX93137	ENSG00000115267	1555464_at
60	4.35299	I	24	IFIH1	interferon induced with helicase C domain 1 [Source:HGNC Symbol;Acc:18873]	AAX93137	ENSG00000115267	1555464_at
67	3.65879	I	6	IFIH1	interferon induced with helicase C domain 1 [Source:HGNC Symbol;Acc:18873]	AAX93137	ENSG00000115267	1555464_at
144	10.2365	II	24	IFIH1	interferon induced with helicase C domain 1 [Source:HGNC Symbol;Acc:18873]	AAX93137	ENSG00000115267	1555464_at
183	2.54672	II	24	IFIH1	interferon induced with helicase C domain 1 [Source:HGNC Symbol;Acc:18873]	AAX93137	ENSG00000115267	1555464_at
184	2.65163	II	24	IFIH1	interferon induced with helicase C domain 1 [Source:HGNC Symbol;Acc:18873]	AAX93137	ENSG00000115267	1555464_at
185	3.86899	I	16	IFIH1	interferon induced with helicase C domain 1 [Source:HGNC Symbol;Acc:18873]	AAX93137	ENSG00000115267	1555464_at
300	5.16976	I	6	IFIH1	interferon induced with helicase C domain 1 [Source:HGNC Symbol;Acc:18873]	AAX93137	ENSG00000115267	1555464_at
305	8.84878	II	1.5	IFIH1	interferon induced with helicase C domain 1 [Source:HGNC Symbol;Acc:18873]	AAX93137	ENSG00000115267	1555464_at
306	34.677	I	1.5	IFIH1	interferon induced with helicase C domain 1 [Source:HGNC Symbol;Acc:18873]	AAX93137	ENSG00000115267	1555464_at
311	4.54557	II	24	IFIH1	interferon induced with helicase C domain 1 [Source:HGNC Symbol;Acc:18873]	AAX93137	ENSG00000115267	1555464_at
58	2.61268	I	3	IFIH1	interferon induced with helicase C domain 1 [Source:HGNC Symbol;Acc:18873]	AAX93137	ENSG00000115267	33612_at
74	4.63966	I	16	IFIH1	interferon induced with helicase C domain 1 [Source:HGNC Symbol;Acc:18873]	AAX93137	ENSG00000115267	ILMN_1781373
75	7.38697	I	16	IFIH1	interferon induced with helicase C domain 1 [Source:HGNC Symbol;Acc:18873]	AAX93137	ENSG00000115267	ILMN_1781373
78	7.55043	I	12	IFIH1	interferon induced with helicase C domain 1 [Source:HGNC Symbol;Acc:18873]	AAX93137	ENSG00000115267	ILMN_1781373
79	6.46325	I	24	IFIH1	interferon induced with helicase C domain 1 [Source:HGNC Symbol;Acc:18873]	AAX93137	ENSG00000115267	ILMN_1781373
80	5.3914	I	48	IFIH1	interferon induced with helicase C domain 1 [Source:HGNC Symbol;Acc:18873]	AAX93137	ENSG00000115267	ILMN_1781373
81	4.16861	I	4	IFIH1	interferon induced with helicase C domain 1 [Source:HGNC Symbol;Acc:18873]	AAX93137	ENSG00000115267	ILMN_1781373
82	3.14166	II	12	IFIH1	interferon induced with helicase C domain 1 [Source:HGNC Symbol;Acc:18873]	AAX93137	ENSG00000115267	ILMN_1781373
83	3.61368	II	24	IFIH1	interferon induced with helicase C domain 1 [Source:HGNC Symbol;Acc:18873]	AAX93137	ENSG00000115267	ILMN_1781373
85	3.5573	II	48	IFIH1	interferon induced with helicase C domain 1 [Source:HGNC Symbol;Acc:18873]	AAX93137	ENSG00000115267	ILMN_1781373
123	2.61943	II	168	IFIH1	interferon induced with helicase C domain 1 [Source:HGNC Symbol;Acc:18873]	AAX93137	ENSG00000115267	ILMN_1781373
124	2.67124	II	168	IFIH1	interferon induced with helicase C domain 1 [Source:HGNC Symbol;Acc:18873]	AAX93137	ENSG00000115267	ILMN_1781373
128	20.5568	II	10	IFIH1	interferon induced with helicase C domain 1 [Source:HGNC Symbol;Acc:18873]	AAX93137	ENSG00000115267	ILMN_1781373
129	62.6398	I	10	IFIH1	interferon induced with helicase C domain 1 [Source:HGNC Symbol;Acc:18873]	AAX93137	ENSG00000115267	ILMN_1781373
130	42.257	I	10	IFIH1	interferon induced with helicase C domain 1 [Source:HGNC Symbol;Acc:18873]	AAX93137	ENSG00000115267	ILMN_1781373
131	17.9072	II	10	IFIH1	interferon induced with helicase C domain 1 [Source:HGNC Symbol;Acc:18873]	AAX93137	ENSG00000115267	ILMN_1781373
160	7.09225	I	18	IFIH1	interferon induced with helicase C domain 1 [Source:HGNC Symbol;Acc:18873]	AAX93137	ENSG00000115267	ILMN_1781373
161	10.7277	I	6	IFIH1	interferon induced with helicase C domain 1 [Source:HGNC Symbol;Acc:18873]	AAX93137	ENSG00000115267	ILMN_1781373
162	4.49382	II	6	IFIH1	interferon induced with helicase C domain 1 [Source:HGNC Symbol;Acc:18873]	AAX93137	ENSG00000115267	ILMN_1781373
163	4.75734	I	3	IFIH1	interferon induced with helicase C domain 1 [Source:HGNC Symbol;Acc:18873]	AAX93137	ENSG00000115267	ILMN_1781373
200	5.72395	I	10	IFIH1	interferon induced with helicase C domain 1 [Source:HGNC Symbol;Acc:18873]	AAX93137	ENSG00000115267	ILMN_1781373
249	21.1275	I	12	IFIH1	interferon induced with helicase C domain 1 [Source:HGNC Symbol;Acc:18873]	AAX93137	ENSG00000115267	ILMN_1781373
250	3.72446	I	2	IFIH1	interferon induced with helicase C domain 1 [Source:HGNC Symbol;Acc:18873]	AAX93137	ENSG00000115267	ILMN_1781373
251	19.3594	I	24	IFIH1	interferon induced with helicase C domain 1 [Source:HGNC Symbol;Acc:18873]	AAX93137	ENSG00000115267	ILMN_1781373
253	11.8209	I	4	IFIH1	interferon induced with helicase C domain 1 [Source:HGNC Symbol;Acc:18873]	AAX93137	ENSG00000115267	ILMN_1781373
254	18.1786	I	6	IFIH1	interferon induced with helicase C domain 1 [Source:HGNC Symbol;Acc:18873]	AAX93137	ENSG00000115267	ILMN_1781373
255	3.41985	III	6	IFIH1	interferon induced with helicase C domain 1 [Source:HGNC Symbol;Acc:18873]	AAX93137	ENSG00000115267	ILMN_1781373
257	4.55869	III	12	IFIH1	interferon induced with helicase C domain 1 [Source:HGNC Symbol;Acc:18873]	AAX93137	ENSG00000115267	ILMN_1781373
260	2.62207	III	4	IFIH1	interferon induced with helicase C domain 1 [Source:HGNC Symbol;Acc:18873]	AAX93137	ENSG00000115267	ILMN_1781373
261	4.07296	III	6	IFIH1	interferon induced with helicase C domain 1 [Source:HGNC Symbol;Acc:18873]	AAX93137	ENSG00000115267	ILMN_1781373
263	3.25872	III	12	IFIH1	interferon induced with helicase C domain 1 [Source:HGNC Symbol;Acc:18873]	AAX93137	ENSG00000115267	ILMN_1781373
265	2.37686	III	24	IFIH1	interferon induced with helicase C domain 1 [Source:HGNC Symbol;Acc:18873]	AAX93137	ENSG00000115267	ILMN_1781373
266	2.00223	III	4	IFIH1	interferon induced with helicase C domain 1 [Source:HGNC Symbol;Acc:18873]	AAX93137	ENSG00000115267	ILMN_1781373
267	2.97593	III	6	IFIH1	interferon induced with helicase C domain 1 [Source:HGNC Symbol;Acc:18873]	AAX93137	ENSG00000115267	ILMN_1781373
269	3.90381	III	12	IFIH1	interferon induced with helicase C domain 1 [Source:HGNC Symbol;Acc:18873]	AAX93137	ENSG00000115267	ILMN_1781373
271	2.93263	III	24	IFIH1	interferon induced with helicase C domain 1 [Source:HGNC Symbol;Acc:18873]	AAX93137	ENSG00000115267	ILMN_1781373
275	105.29	I	8	IFIH1	interferon induced with helicase C domain 1 [Source:HGNC Symbol;Acc:18873]	AAX93137	ENSG00000115267	ILMN_1781373
276	43.5161	I	2	IFIH1	interferon induced with helicase C domain 1 [Source:HGNC Symbol;Acc:18873]	AAX93137	ENSG00000115267	ILMN_1781373
277	70.5583	I	8	IFIH1	interferon induced with helicase C domain 1 [Source:HGNC Symbol;Acc:18873]	AAX93137	ENSG00000115267	ILMN_1781373
278	31.3401	I	2	IFIH1	interferon induced with helicase C domain 1 [Source:HGNC Symbol;Acc:18873]	AAX93137	ENSG00000115267	ILMN_1781373
279	22.1857	I	48	IFIH1	interferon induced with helicase C domain 1 [Source:HGNC Symbol;Acc:18873]	AAX93137	ENSG00000115267	ILMN_1781373
280	25.3793	I	48	IFIH1	interferon induced with helicase C domain 1 [Source:HGNC Symbol;Acc:18873]	AAX93137	ENSG00000115267	ILMN_1781373
281	22.6635	I	48	IFIH1	interferon induced with helicase C domain 1 [Source:HGNC Symbol;Acc:18873]	AAX93137	ENSG00000115267	ILMN_1781373
324	2.51776	II	72	IFIH1	interferon induced with helicase C domain 1 [Source:HGNC Symbol;Acc:18873]	AAX93137	ENSG00000115267	ILMN_1781373
347	15.2568	I	6	IFIH1	interferon induced with helicase C domain 1 [Source:HGNC Symbol;Acc:18873]	AAX93137	ENSG00000115267	ILMN_1781373
348	11.6906	I	4	IFIH1	interferon induced with helicase C domain 1 [Source:HGNC Symbol;Acc:18873]	AAX93137	ENSG00000115267	ILMN_1781373
350	3.32152	I	2	IFIH1	interferon induced with helicase C domain 1 [Source:HGNC Symbol;Acc:18873]	AAX93137	ENSG00000115267	ILMN_1781373
352	7.81089	I	12	IFIH1	interferon induced with helicase C domain 1 [Source:HGNC Symbol;Acc:18873]	AAX93137	ENSG00000115267	ILMN_1781373
353	4.39121	I	24	IFIH1	interferon induced with helicase C domain 1 [Source:HGNC Symbol;Acc:18873]	AAX93137	ENSG00000115267	ILMN_1781373
354	4.46276	I	48	IFIH1	interferon induced with helicase C domain 1 [Source:HGNC Symbol;Acc:18873]	AAX93137	ENSG00000115267	ILMN_1781373
356	4.15393	I	24	IFIH1	interferon induced with helicase C domain 1 [Source:HGNC Symbol;Acc:18873]	AAX93137	ENSG00000115267	ILMN_1781373
358	4.77833	I	12	IFIH1	interferon induced with helicase C domain 1 [Source:HGNC Symbol;Acc:18873]	AAX93137	ENSG00000115267	ILMN_1781373
360	7.14749	I	3	IFIH1	interferon induced with helicase C domain 1 [Source:HGNC Symbol;Acc:18873]	AAX93137	ENSG00000115267	ILMN_1781373
362	8.6533	I	6	IFIH1	interferon induced with helicase C domain 1 [Source:HGNC Symbol;Acc:18873]	AAX93137	ENSG00000115267	ILMN_1781373
366	3.81679	I	96	IFIH1	interferon induced with helicase C domain 1 [Source:HGNC Symbol;Acc:18873]	AAX93137	ENSG00000115267	ILMN_1781373
373	16.8246	I	24	IFIH1	interferon induced with helicase C domain 1 [Source:HGNC Symbol;Acc:18873]	AAX93137	ENSG00000115267	ILMN_1781373
374	13.3218	I	6	IFIH1	interferon induced with helicase C domain 1 [Source:HGNC Symbol;Acc:18873]	AAX93137	ENSG00000115267	ILMN_1781373
375	14.062	I	6	IFIH1	interferon induced with helicase C domain 1 [Source:HGNC Symbol;Acc:18873]	AAX93137	ENSG00000115267	ILMN_1781373
376	9.88701	I	24	IFIH1	interferon induced with helicase C domain 1 [Source:HGNC Symbol;Acc:18873]	AAX93137	ENSG00000115267	ILMN_1781373
86	2.14082	II	3	IFIH1	interferon induced with helicase C domain 1 [Source:HGNC Symbol;Acc:18873]	AAX93137	ENSG00000115267	8056285
87	5.00361	II	12	IFIH1	interferon induced with helicase C domain 1 [Source:HGNC Symbol;Acc:18873]	AAX93137	ENSG00000115267	8056285
88	4.44967	II	24	IFIH1	interferon induced with helicase C domain 1 [Source:HGNC Symbol;Acc:18873]	AAX93137	ENSG00000115267	8056285
122	2.84566	I	120	IFIH1	interferon induced with helicase C domain 1 [Source:HGNC Symbol;Acc:18873]	AAX93137	ENSG00000115267	8056285
143	11.7919	I	6	IFIH1	interferon induced with helicase C domain 1 [Source:HGNC Symbol;Acc:18873]	AAX93137	ENSG00000115267	8056285
201	7.91418	I	2	IFIH1	interferon induced with helicase C domain 1 [Source:HGNC Symbol;Acc:18873]	AAX93137	ENSG00000115267	8056285
202	3.3124	I	6	IFIH1	interferon induced with helicase C domain 1 [Source:HGNC Symbol;Acc:18873]	AAX93137	ENSG00000115267	8056285
203	3.59719	I	18	IFIH1	interferon induced with helicase C domain 1 [Source:HGNC Symbol;Acc:18873]	AAX93137	ENSG00000115267	8056285
304	4.32816	II	6	IFIH1	interferon induced with helicase C domain 1 [Source:HGNC Symbol;Acc:18873]	AAX93137	ENSG00000115267	8056285
307	5.40582	II	48	IFIH1	interferon induced with helicase C domain 1 [Source:HGNC Symbol;Acc:18873]	AAX93137	ENSG00000115267	8056285
308	6.98059	II	48	IFIH1	interferon induced with helicase C domain 1 [Source:HGNC Symbol;Acc:18873]	AAX93137	ENSG00000115267	8056285
125	2.04454	I	3	IRF5	interferon regulatory factor 5 [Source:HGNC Symbol;Acc:6120]	AAU12879	ENSG00000128604	A_23_P500271
318	2.31917	II	6	IRF5	interferon regulatory factor 5 [Source:HGNC Symbol;Acc:6120]	AAU12879	ENSG00000128604	A_23_P500271
146	3.61856	II	4	IRF5	interferon regulatory factor 5 [Source:HGNC Symbol;Acc:6120]	AAU12879	ENSG00000128604	A_24_P363609
318	2.32172	II	6	IRF5	interferon regulatory factor 5 [Source:HGNC Symbol;Acc:6120]	AAU12879	ENSG00000128604	A_24_P363609
319	3.30135	II	18	IRF5	interferon regulatory factor 5 [Source:HGNC Symbol;Acc:6120]	AAU12879	ENSG00000128604	A_24_P363609
74	2.31774	I	16	IRF5	interferon regulatory factor 5 [Source:HGNC Symbol;Acc:6120]	AAU12879	ENSG00000128604	ILMN_2312606
125	7.40092	I	3	IRF7	interferon regulatory factor 7 [Source:HGNC Symbol;Acc:6122]		ENSG00000185507	A_24_P378019
146	4.63492	II	4	IRF7	interferon regulatory factor 7 [Source:HGNC Symbol;Acc:6122]		ENSG00000185507	A_24_P378019
147	11.3942	I	4	IRF7	interferon regulatory factor 7 [Source:HGNC Symbol;Acc:6122]		ENSG00000185507	A_24_P378019
148	4.34155	I	6	IRF7	interferon regulatory factor 7 [Source:HGNC Symbol;Acc:6122]		ENSG00000185507	A_24_P378019
174	4.01568	II	20	IRF7	interferon regulatory factor 7 [Source:HGNC Symbol;Acc:6122]		ENSG00000185507	A_24_P378019
192	11.6437	I	6	IRF7	interferon regulatory factor 7 [Source:HGNC Symbol;Acc:6122]		ENSG00000185507	A_24_P378019
193	9.40857	I	12	IRF7	interferon regulatory factor 7 [Source:HGNC Symbol;Acc:6122]		ENSG00000185507	A_24_P378019
226	29.4743	I	6	IRF7	interferon regulatory factor 7 [Source:HGNC Symbol;Acc:6122]		ENSG00000185507	A_24_P378019
227	20.5073	I	12	IRF7	interferon regulatory factor 7 [Source:HGNC Symbol;Acc:6122]		ENSG00000185507	A_24_P378019
228	11.2683	I	18	IRF7	interferon regulatory factor 7 [Source:HGNC Symbol;Acc:6122]		ENSG00000185507	A_24_P378019
293	23.1651	II	24	IRF7	interferon regulatory factor 7 [Source:HGNC Symbol;Acc:6122]		ENSG00000185507	A_24_P378019
318	4.76795	II	6	IRF7	interferon regulatory factor 7 [Source:HGNC Symbol;Acc:6122]		ENSG00000185507	A_24_P378019
319	6.61916	II	18	IRF7	interferon regulatory factor 7 [Source:HGNC Symbol;Acc:6122]		ENSG00000185507	A_24_P378019
12	3.87805	II	24	IRF7	interferon regulatory factor 7 [Source:HGNC Symbol;Acc:6122]		ENSG00000185507	208436_s_at
13	2.75328	II	6	IRF7	interferon regulatory factor 7 [Source:HGNC Symbol;Acc:6122]		ENSG00000185507	208436_s_at
14	26.0612	I	24	IRF7	interferon regulatory factor 7 [Source:HGNC Symbol;Acc:6122]		ENSG00000185507	208436_s_at
15	24.5907	I	6	IRF7	interferon regulatory factor 7 [Source:HGNC Symbol;Acc:6122]		ENSG00000185507	208436_s_at
22	28.1614	I	12	IRF7	interferon regulatory factor 7 [Source:HGNC Symbol;Acc:6122]		ENSG00000185507	208436_s_at
23	24.2324	I	8	IRF7	interferon regulatory factor 7 [Source:HGNC Symbol;Acc:6122]		ENSG00000185507	208436_s_at
24	20.2904	I	6	IRF7	interferon regulatory factor 7 [Source:HGNC Symbol;Acc:6122]		ENSG00000185507	208436_s_at
25	9.23049	I	4	IRF7	interferon regulatory factor 7 [Source:HGNC Symbol;Acc:6122]		ENSG00000185507	208436_s_at
26	4.78941	I	2	IRF7	interferon regulatory factor 7 [Source:HGNC Symbol;Acc:6122]		ENSG00000185507	208436_s_at
27	3.04392	I	1.5	IRF7	interferon regulatory factor 7 [Source:HGNC Symbol;Acc:6122]		ENSG00000185507	208436_s_at
38	22.5908	I	5	IRF7	interferon regulatory factor 7 [Source:HGNC Symbol;Acc:6122]		ENSG00000185507	208436_s_at
40	35.5451	I	5	IRF7	interferon regulatory factor 7 [Source:HGNC Symbol;Acc:6122]		ENSG00000185507	208436_s_at
41	32.0316	I	5	IRF7	interferon regulatory factor 7 [Source:HGNC Symbol;Acc:6122]		ENSG00000185507	208436_s_at
43	6.928	I	12	IRF7	interferon regulatory factor 7 [Source:HGNC Symbol;Acc:6122]		ENSG00000185507	208436_s_at
44	11.7265	I	6	IRF7	interferon regulatory factor 7 [Source:HGNC Symbol;Acc:6122]		ENSG00000185507	208436_s_at
45	7.25167	I	12	IRF7	interferon regulatory factor 7 [Source:HGNC Symbol;Acc:6122]		ENSG00000185507	208436_s_at
46	8.03022	I	6	IRF7	interferon regulatory factor 7 [Source:HGNC Symbol;Acc:6122]		ENSG00000185507	208436_s_at
48	2.44073	I	5	IRF7	interferon regulatory factor 7 [Source:HGNC Symbol;Acc:6122]		ENSG00000185507	208436_s_at
60	6.93534	I	24	IRF7	interferon regulatory factor 7 [Source:HGNC Symbol;Acc:6122]		ENSG00000185507	208436_s_at
61	9.0411	I	72	IRF7	interferon regulatory factor 7 [Source:HGNC Symbol;Acc:6122]		ENSG00000185507	208436_s_at
63	4.50788	II	6	IRF7	interferon regulatory factor 7 [Source:HGNC Symbol;Acc:6122]		ENSG00000185507	208436_s_at
64	5.19982	II	24	IRF7	interferon regulatory factor 7 [Source:HGNC Symbol;Acc:6122]		ENSG00000185507	208436_s_at
177	8.86137	I	48	IRF7	interferon regulatory factor 7 [Source:HGNC Symbol;Acc:6122]		ENSG00000185507	208436_s_at
178	4.46804	I	48	IRF7	interferon regulatory factor 7 [Source:HGNC Symbol;Acc:6122]		ENSG00000185507	208436_s_at
179	4.04813	I	48	IRF7	interferon regulatory factor 7 [Source:HGNC Symbol;Acc:6122]		ENSG00000185507	208436_s_at
183	3.92889	II	24	IRF7	interferon regulatory factor 7 [Source:HGNC Symbol;Acc:6122]		ENSG00000185507	208436_s_at
184	3.34689	II	24	IRF7	interferon regulatory factor 7 [Source:HGNC Symbol;Acc:6122]		ENSG00000185507	208436_s_at
185	2.95883	I	16	IRF7	interferon regulatory factor 7 [Source:HGNC Symbol;Acc:6122]		ENSG00000185507	208436_s_at
186	3.44208	I	48	IRF7	interferon regulatory factor 7 [Source:HGNC Symbol;Acc:6122]		ENSG00000185507	208436_s_at
187	2.98858	I	96	IRF7	interferon regulatory factor 7 [Source:HGNC Symbol;Acc:6122]		ENSG00000185507	208436_s_at
188	2.00367	I	144	IRF7	interferon regulatory factor 7 [Source:HGNC Symbol;Acc:6122]		ENSG00000185507	208436_s_at
295	3.33598	II	24	IRF7	interferon regulatory factor 7 [Source:HGNC Symbol;Acc:6122]		ENSG00000185507	208436_s_at
300	3.86975	I	6	IRF7	interferon regulatory factor 7 [Source:HGNC Symbol;Acc:6122]		ENSG00000185507	208436_s_at
305	8.43966	II	1.5	IRF7	interferon regulatory factor 7 [Source:HGNC Symbol;Acc:6122]		ENSG00000185507	208436_s_at
306	9.44638	I	1.5	IRF7	interferon regulatory factor 7 [Source:HGNC Symbol;Acc:6122]		ENSG00000185507	208436_s_at
311	3.05316	II	24	IRF7	interferon regulatory factor 7 [Source:HGNC Symbol;Acc:6122]		ENSG00000185507	208436_s_at
313	4.59353	II	72	IRF7	interferon regulatory factor 7 [Source:HGNC Symbol;Acc:6122]		ENSG00000185507	208436_s_at
32	14.9162	I	3	IRF7	interferon regulatory factor 7 [Source:HGNC Symbol;Acc:6122]		ENSG00000185507	36412_s_at
58	13.5538	I	3	IRF7	interferon regulatory factor 7 [Source:HGNC Symbol;Acc:6122]		ENSG00000185507	36412_s_at
74	3.63452	I	16	IRF7	interferon regulatory factor 7 [Source:HGNC Symbol;Acc:6122]		ENSG00000185507	ILMN_2349061
75	15.4302	I	16	IRF7	interferon regulatory factor 7 [Source:HGNC Symbol;Acc:6122]		ENSG00000185507	ILMN_2349061
78	5.78919	I	12	IRF7	interferon regulatory factor 7 [Source:HGNC Symbol;Acc:6122]		ENSG00000185507	ILMN_2349061
79	4.3526	I	24	IRF7	interferon regulatory factor 7 [Source:HGNC Symbol;Acc:6122]		ENSG00000185507	ILMN_2349061
80	3.59849	I	48	IRF7	interferon regulatory factor 7 [Source:HGNC Symbol;Acc:6122]		ENSG00000185507	ILMN_2349061
81	2.45231	I	4	IRF7	interferon regulatory factor 7 [Source:HGNC Symbol;Acc:6122]		ENSG00000185507	ILMN_2349061
128	4.08716	II	10	IRF7	interferon regulatory factor 7 [Source:HGNC Symbol;Acc:6122]		ENSG00000185507	ILMN_2349061
129	27.6502	I	10	IRF7	interferon regulatory factor 7 [Source:HGNC Symbol;Acc:6122]		ENSG00000185507	ILMN_2349061
130	16.823	I	10	IRF7	interferon regulatory factor 7 [Source:HGNC Symbol;Acc:6122]		ENSG00000185507	ILMN_2349061
131	3.34469	II	10	IRF7	interferon regulatory factor 7 [Source:HGNC Symbol;Acc:6122]		ENSG00000185507	ILMN_2349061
160	7.64442	I	18	IRF7	interferon regulatory factor 7 [Source:HGNC Symbol;Acc:6122]		ENSG00000185507	ILMN_2349061
200	3.14968	I	10	IRF7	interferon regulatory factor 7 [Source:HGNC Symbol;Acc:6122]		ENSG00000185507	ILMN_2349061
275	29.2455	I	8	IRF7	interferon regulatory factor 7 [Source:HGNC Symbol;Acc:6122]		ENSG00000185507	ILMN_2349061
276	11.7926	I	2	IRF7	interferon regulatory factor 7 [Source:HGNC Symbol;Acc:6122]		ENSG00000185507	ILMN_2349061
277	26.2132	I	8	IRF7	interferon regulatory factor 7 [Source:HGNC Symbol;Acc:6122]		ENSG00000185507	ILMN_2349061
278	11.8252	I	2	IRF7	interferon regulatory factor 7 [Source:HGNC Symbol;Acc:6122]		ENSG00000185507	ILMN_2349061
279	7.60075	I	48	IRF7	interferon regulatory factor 7 [Source:HGNC Symbol;Acc:6122]		ENSG00000185507	ILMN_2349061
280	6.63841	I	48	IRF7	interferon regulatory factor 7 [Source:HGNC Symbol;Acc:6122]		ENSG00000185507	ILMN_2349061
281	7.5007	I	48	IRF7	interferon regulatory factor 7 [Source:HGNC Symbol;Acc:6122]		ENSG00000185507	ILMN_2349061
354	4.7041	I	48	IRF7	interferon regulatory factor 7 [Source:HGNC Symbol;Acc:6122]		ENSG00000185507	ILMN_2349061
356	5.33756	I	24	IRF7	interferon regulatory factor 7 [Source:HGNC Symbol;Acc:6122]		ENSG00000185507	ILMN_2349061
358	5.67801	I	12	IRF7	interferon regulatory factor 7 [Source:HGNC Symbol;Acc:6122]		ENSG00000185507	ILMN_2349061
360	4.51811	I	3	IRF7	interferon regulatory factor 7 [Source:HGNC Symbol;Acc:6122]		ENSG00000185507	ILMN_2349061
362	7.64683	I	6	IRF7	interferon regulatory factor 7 [Source:HGNC Symbol;Acc:6122]		ENSG00000185507	ILMN_2349061
366	3.73235	I	96	IRF7	interferon regulatory factor 7 [Source:HGNC Symbol;Acc:6122]		ENSG00000185507	ILMN_2349061
373	7.62812	I	24	IRF7	interferon regulatory factor 7 [Source:HGNC Symbol;Acc:6122]		ENSG00000185507	ILMN_2349061
374	7.58961	I	6	IRF7	interferon regulatory factor 7 [Source:HGNC Symbol;Acc:6122]		ENSG00000185507	ILMN_2349061
375	8.02673	I	6	IRF7	interferon regulatory factor 7 [Source:HGNC Symbol;Acc:6122]		ENSG00000185507	ILMN_2349061
376	7.24056	I	24	IRF7	interferon regulatory factor 7 [Source:HGNC Symbol;Acc:6122]		ENSG00000185507	ILMN_2349061
74	4.32704	I	16	IRF7	interferon regulatory factor 7 [Source:HGNC Symbol;Acc:6122]		ENSG00000185507	ILMN_1798181
75	11.3934	I	16	IRF7	interferon regulatory factor 7 [Source:HGNC Symbol;Acc:6122]		ENSG00000185507	ILMN_1798181
78	15.7818	I	12	IRF7	interferon regulatory factor 7 [Source:HGNC Symbol;Acc:6122]		ENSG00000185507	ILMN_1798181
79	13.6098	I	24	IRF7	interferon regulatory factor 7 [Source:HGNC Symbol;Acc:6122]		ENSG00000185507	ILMN_1798181
80	9.95094	I	48	IRF7	interferon regulatory factor 7 [Source:HGNC Symbol;Acc:6122]		ENSG00000185507	ILMN_1798181
81	6.05453	I	4	IRF7	interferon regulatory factor 7 [Source:HGNC Symbol;Acc:6122]		ENSG00000185507	ILMN_1798181
82	2.8294	II	12	IRF7	interferon regulatory factor 7 [Source:HGNC Symbol;Acc:6122]		ENSG00000185507	ILMN_1798181
83	3.40087	II	24	IRF7	interferon regulatory factor 7 [Source:HGNC Symbol;Acc:6122]		ENSG00000185507	ILMN_1798181
85	2.95368	II	48	IRF7	interferon regulatory factor 7 [Source:HGNC Symbol;Acc:6122]		ENSG00000185507	ILMN_1798181
124	2.73332	II	168	IRF7	interferon regulatory factor 7 [Source:HGNC Symbol;Acc:6122]		ENSG00000185507	ILMN_1798181
128	4.89583	II	10	IRF7	interferon regulatory factor 7 [Source:HGNC Symbol;Acc:6122]		ENSG00000185507	ILMN_1798181
129	31.0664	I	10	IRF7	interferon regulatory factor 7 [Source:HGNC Symbol;Acc:6122]		ENSG00000185507	ILMN_1798181
130	22.9506	I	10	IRF7	interferon regulatory factor 7 [Source:HGNC Symbol;Acc:6122]		ENSG00000185507	ILMN_1798181
131	3.5879	II	10	IRF7	interferon regulatory factor 7 [Source:HGNC Symbol;Acc:6122]		ENSG00000185507	ILMN_1798181
160	6.90777	I	18	IRF7	interferon regulatory factor 7 [Source:HGNC Symbol;Acc:6122]		ENSG00000185507	ILMN_1798181
161	5.31372	I	6	IRF7	interferon regulatory factor 7 [Source:HGNC Symbol;Acc:6122]		ENSG00000185507	ILMN_1798181
163	9.50464	I	3	IRF7	interferon regulatory factor 7 [Source:HGNC Symbol;Acc:6122]		ENSG00000185507	ILMN_1798181
200	12.7149	I	10	IRF7	interferon regulatory factor 7 [Source:HGNC Symbol;Acc:6122]		ENSG00000185507	ILMN_1798181
275	33.0421	I	8	IRF7	interferon regulatory factor 7 [Source:HGNC Symbol;Acc:6122]		ENSG00000185507	ILMN_1798181
276	15.4503	I	2	IRF7	interferon regulatory factor 7 [Source:HGNC Symbol;Acc:6122]		ENSG00000185507	ILMN_1798181
277	25.0342	I	8	IRF7	interferon regulatory factor 7 [Source:HGNC Symbol;Acc:6122]		ENSG00000185507	ILMN_1798181
278	12.4244	I	2	IRF7	interferon regulatory factor 7 [Source:HGNC Symbol;Acc:6122]		ENSG00000185507	ILMN_1798181
279	14.9236	I	48	IRF7	interferon regulatory factor 7 [Source:HGNC Symbol;Acc:6122]		ENSG00000185507	ILMN_1798181
280	9.29552	I	48	IRF7	interferon regulatory factor 7 [Source:HGNC Symbol;Acc:6122]		ENSG00000185507	ILMN_1798181
281	14.0226	I	48	IRF7	interferon regulatory factor 7 [Source:HGNC Symbol;Acc:6122]		ENSG00000185507	ILMN_1798181
324	3.14786	II	72	IRF7	interferon regulatory factor 7 [Source:HGNC Symbol;Acc:6122]		ENSG00000185507	ILMN_1798181
354	5.09742	I	48	IRF7	interferon regulatory factor 7 [Source:HGNC Symbol;Acc:6122]		ENSG00000185507	ILMN_1798181
356	5.15593	I	24	IRF7	interferon regulatory factor 7 [Source:HGNC Symbol;Acc:6122]		ENSG00000185507	ILMN_1798181
358	5.48613	I	12	IRF7	interferon regulatory factor 7 [Source:HGNC Symbol;Acc:6122]		ENSG00000185507	ILMN_1798181
360	5.28451	I	3	IRF7	interferon regulatory factor 7 [Source:HGNC Symbol;Acc:6122]		ENSG00000185507	ILMN_1798181
362	7.3154	I	6	IRF7	interferon regulatory factor 7 [Source:HGNC Symbol;Acc:6122]		ENSG00000185507	ILMN_1798181
366	3.50805	I	96	IRF7	interferon regulatory factor 7 [Source:HGNC Symbol;Acc:6122]		ENSG00000185507	ILMN_1798181
373	17.1133	I	24	IRF7	interferon regulatory factor 7 [Source:HGNC Symbol;Acc:6122]		ENSG00000185507	ILMN_1798181
374	16.3879	I	6	IRF7	interferon regulatory factor 7 [Source:HGNC Symbol;Acc:6122]		ENSG00000185507	ILMN_1798181
375	16.3675	I	6	IRF7	interferon regulatory factor 7 [Source:HGNC Symbol;Acc:6122]		ENSG00000185507	ILMN_1798181
376	12.2374	I	24	IRF7	interferon regulatory factor 7 [Source:HGNC Symbol;Acc:6122]		ENSG00000185507	ILMN_1798181
129	2.17861	I	10	IRF7	interferon regulatory factor 7 [Source:HGNC Symbol;Acc:6122]		ENSG00000185507	ILMN_1674646
277	3.11224	I	8	IRF7	interferon regulatory factor 7 [Source:HGNC Symbol;Acc:6122]		ENSG00000185507	ILMN_1674646
146	2.79288	II	4	IRF7	interferon regulatory factor 7 [Source:HGNC Symbol;Acc:6122]		ENSG00000185507	A_24_P118892
147	6.07446	I	4	IRF7	interferon regulatory factor 7 [Source:HGNC Symbol;Acc:6122]		ENSG00000185507	A_24_P118892
149	2.7745	I	24	IRF7	interferon regulatory factor 7 [Source:HGNC Symbol;Acc:6122]		ENSG00000185507	A_24_P118892
319	5.29479	II	18	IRF7	interferon regulatory factor 7 [Source:HGNC Symbol;Acc:6122]		ENSG00000185507	A_24_P118892
143	3.03018	I	6	IRF7	interferon regulatory factor 7 [Source:HGNC Symbol;Acc:6122]		ENSG00000185507	7945462
201	4.44936	I	2	IRF7	interferon regulatory factor 7 [Source:HGNC Symbol;Acc:6122]		ENSG00000185507	7945462
202	4.06698	I	6	IRF7	interferon regulatory factor 7 [Source:HGNC Symbol;Acc:6122]		ENSG00000185507	7945462
203	2.94863	I	18	IRF7	interferon regulatory factor 7 [Source:HGNC Symbol;Acc:6122]		ENSG00000185507	7945462
301	3.75208	I	6	IRF7	interferon regulatory factor 7 [Source:HGNC Symbol;Acc:6122]		ENSG00000185507	7945462
193	2.00414	I	12	ITGAM	integrin, alpha M (complement component 3 receptor 3 subunit) [Source:HGNC Symbol;Acc:6149]		ENSG00000169896	A_23_P124108
194	2.15201	I	18	ITGAM	integrin, alpha M (complement component 3 receptor 3 subunit) [Source:HGNC Symbol;Acc:6149]		ENSG00000169896	A_23_P124108
147	2.0381	I	4	MARCHF1	membrane-associated ring finger (C3HC4) 1, E3 ubiquitin protein ligase [Source:HGNC Symbol;Acc:26077]	BAH13475	ENSG00000145416	A_23_P7262
147	2.06983	I	4	MARCHF1	membrane-associated ring finger (C3HC4) 1, E3 ubiquitin protein ligase [Source:HGNC Symbol;Acc:26077]	BAH13475	ENSG00000145416	A_24_P354412
317	2.22594	II	18	MARCHF1	membrane-associated ring finger (C3HC4) 1, E3 ubiquitin protein ligase [Source:HGNC Symbol;Acc:26077]	BAH13475	ENSG00000145416	A_24_P354412
311	2.21133	II	24	MARCHF1	membrane-associated ring finger (C3HC4) 1, E3 ubiquitin protein ligase [Source:HGNC Symbol;Acc:26077]	BAH13475	ENSG00000145416	229383_at
185	2.89204	I	16	MARCHF1	membrane-associated ring finger (C3HC4) 1, E3 ubiquitin protein ligase [Source:HGNC Symbol;Acc:26077]	BAH13475	ENSG00000145416	219574_at
187	2.72757	I	96	MARCHF1	membrane-associated ring finger (C3HC4) 1, E3 ubiquitin protein ligase [Source:HGNC Symbol;Acc:26077]	BAH13475	ENSG00000145416	219574_at
311	2.53234	II	24	MARCHF1	membrane-associated ring finger (C3HC4) 1, E3 ubiquitin protein ligase [Source:HGNC Symbol;Acc:26077]	BAH13475	ENSG00000145416	219574_at
313	2.23167	II	72	MARCHF1	membrane-associated ring finger (C3HC4) 1, E3 ubiquitin protein ligase [Source:HGNC Symbol;Acc:26077]	BAH13475	ENSG00000145416	219574_at
187	2.91953	I	96	MARCHF1	membrane-associated ring finger (C3HC4) 1, E3 ubiquitin protein ligase [Source:HGNC Symbol;Acc:26077]	BAH13475	ENSG00000145416	235385_at
311	2.45917	II	24	MARCHF1	membrane-associated ring finger (C3HC4) 1, E3 ubiquitin protein ligase [Source:HGNC Symbol;Acc:26077]	BAH13475	ENSG00000145416	235385_at
313	2.10217	II	72	MARCHF1	membrane-associated ring finger (C3HC4) 1, E3 ubiquitin protein ligase [Source:HGNC Symbol;Acc:26077]	BAH13475	ENSG00000145416	235385_at
124	2.49324	II	168	MARCHF1	membrane-associated ring finger (C3HC4) 1, E3 ubiquitin protein ligase [Source:HGNC Symbol;Acc:26077]	BAH13475	ENSG00000145416	ILMN_1681101
125	2.90332	I	3	MYD88	myeloid differentiation primary response 88 [Source:HGNC Symbol;Acc:7562]		ENSG00000172936	A_23_P362659
126	2.56214	II	24	MYD88	myeloid differentiation primary response 88 [Source:HGNC Symbol;Acc:7562]		ENSG00000172936	A_23_P362659
293	8.62688	II	24	MYD88	myeloid differentiation primary response 88 [Source:HGNC Symbol;Acc:7562]		ENSG00000172936	A_23_P362659
318	2.17749	II	6	MYD88	myeloid differentiation primary response 88 [Source:HGNC Symbol;Acc:7562]		ENSG00000172936	A_23_P362659
15	2.894	I	6	MYD88	myeloid differentiation primary response 88 [Source:HGNC Symbol;Acc:7562]		ENSG00000172936	209124_at
23	3.29053	I	8	MYD88	myeloid differentiation primary response 88 [Source:HGNC Symbol;Acc:7562]		ENSG00000172936	209124_at
24	2.70656	I	6	MYD88	myeloid differentiation primary response 88 [Source:HGNC Symbol;Acc:7562]		ENSG00000172936	209124_at
25	2.46231	I	4	MYD88	myeloid differentiation primary response 88 [Source:HGNC Symbol;Acc:7562]		ENSG00000172936	209124_at
38	6.74255	I	5	MYD88	myeloid differentiation primary response 88 [Source:HGNC Symbol;Acc:7562]		ENSG00000172936	209124_at
40	5.31996	I	5	MYD88	myeloid differentiation primary response 88 [Source:HGNC Symbol;Acc:7562]		ENSG00000172936	209124_at
41	5.26393	I	5	MYD88	myeloid differentiation primary response 88 [Source:HGNC Symbol;Acc:7562]		ENSG00000172936	209124_at
44	2.93487	I	6	MYD88	myeloid differentiation primary response 88 [Source:HGNC Symbol;Acc:7562]		ENSG00000172936	209124_at
47	2.2986	I	5	MYD88	myeloid differentiation primary response 88 [Source:HGNC Symbol;Acc:7562]		ENSG00000172936	209124_at
60	2.22556	I	24	MYD88	myeloid differentiation primary response 88 [Source:HGNC Symbol;Acc:7562]		ENSG00000172936	209124_at
64	2.50672	II	24	MYD88	myeloid differentiation primary response 88 [Source:HGNC Symbol;Acc:7562]		ENSG00000172936	209124_at
177	2.11259	I	48	MYD88	myeloid differentiation primary response 88 [Source:HGNC Symbol;Acc:7562]		ENSG00000172936	209124_at
295	2.17173	II	24	MYD88	myeloid differentiation primary response 88 [Source:HGNC Symbol;Acc:7562]		ENSG00000172936	209124_at
298	2.19687	II	24	MYD88	myeloid differentiation primary response 88 [Source:HGNC Symbol;Acc:7562]		ENSG00000172936	209124_at
58	2.21656	I	3	MYD88	myeloid differentiation primary response 88 [Source:HGNC Symbol;Acc:7562]		ENSG00000172936	38369_at
75	3.76096	I	16	MYD88	myeloid differentiation primary response 88 [Source:HGNC Symbol;Acc:7562]		ENSG00000172936	ILMN_1738523
78	3.06494	I	12	MYD88	myeloid differentiation primary response 88 [Source:HGNC Symbol;Acc:7562]		ENSG00000172936	ILMN_1738523
79	2.16009	I	24	MYD88	myeloid differentiation primary response 88 [Source:HGNC Symbol;Acc:7562]		ENSG00000172936	ILMN_1738523
82	2.09191	II	12	MYD88	myeloid differentiation primary response 88 [Source:HGNC Symbol;Acc:7562]		ENSG00000172936	ILMN_1738523
83	2.03058	II	24	MYD88	myeloid differentiation primary response 88 [Source:HGNC Symbol;Acc:7562]		ENSG00000172936	ILMN_1738523
128	3.07685	II	10	MYD88	myeloid differentiation primary response 88 [Source:HGNC Symbol;Acc:7562]		ENSG00000172936	ILMN_1738523
129	11.0148	I	10	MYD88	myeloid differentiation primary response 88 [Source:HGNC Symbol;Acc:7562]		ENSG00000172936	ILMN_1738523
130	8.90467	I	10	MYD88	myeloid differentiation primary response 88 [Source:HGNC Symbol;Acc:7562]		ENSG00000172936	ILMN_1738523
131	3.08409	II	10	MYD88	myeloid differentiation primary response 88 [Source:HGNC Symbol;Acc:7562]		ENSG00000172936	ILMN_1738523
160	2.37789	I	18	MYD88	myeloid differentiation primary response 88 [Source:HGNC Symbol;Acc:7562]		ENSG00000172936	ILMN_1738523
161	4.06266	I	6	MYD88	myeloid differentiation primary response 88 [Source:HGNC Symbol;Acc:7562]		ENSG00000172936	ILMN_1738523
163	4.63864	I	3	MYD88	myeloid differentiation primary response 88 [Source:HGNC Symbol;Acc:7562]		ENSG00000172936	ILMN_1738523
249	5.0975	I	12	MYD88	myeloid differentiation primary response 88 [Source:HGNC Symbol;Acc:7562]		ENSG00000172936	ILMN_1738523
251	3.59902	I	24	MYD88	myeloid differentiation primary response 88 [Source:HGNC Symbol;Acc:7562]		ENSG00000172936	ILMN_1738523
253	2.81572	I	4	MYD88	myeloid differentiation primary response 88 [Source:HGNC Symbol;Acc:7562]		ENSG00000172936	ILMN_1738523
254	3.85517	I	6	MYD88	myeloid differentiation primary response 88 [Source:HGNC Symbol;Acc:7562]		ENSG00000172936	ILMN_1738523
275	8.8158	I	8	MYD88	myeloid differentiation primary response 88 [Source:HGNC Symbol;Acc:7562]		ENSG00000172936	ILMN_1738523
276	3.83604	I	2	MYD88	myeloid differentiation primary response 88 [Source:HGNC Symbol;Acc:7562]		ENSG00000172936	ILMN_1738523
277	9.19639	I	8	MYD88	myeloid differentiation primary response 88 [Source:HGNC Symbol;Acc:7562]		ENSG00000172936	ILMN_1738523
278	3.59322	I	2	MYD88	myeloid differentiation primary response 88 [Source:HGNC Symbol;Acc:7562]		ENSG00000172936	ILMN_1738523
279	4.18853	I	48	MYD88	myeloid differentiation primary response 88 [Source:HGNC Symbol;Acc:7562]		ENSG00000172936	ILMN_1738523
280	4.22218	I	48	MYD88	myeloid differentiation primary response 88 [Source:HGNC Symbol;Acc:7562]		ENSG00000172936	ILMN_1738523
281	4.13326	I	48	MYD88	myeloid differentiation primary response 88 [Source:HGNC Symbol;Acc:7562]		ENSG00000172936	ILMN_1738523
347	3.29105	I	6	MYD88	myeloid differentiation primary response 88 [Source:HGNC Symbol;Acc:7562]		ENSG00000172936	ILMN_1738523
348	2.36993	I	4	MYD88	myeloid differentiation primary response 88 [Source:HGNC Symbol;Acc:7562]		ENSG00000172936	ILMN_1738523
352	2.17592	I	12	MYD88	myeloid differentiation primary response 88 [Source:HGNC Symbol;Acc:7562]		ENSG00000172936	ILMN_1738523
362	2.59634	I	6	MYD88	myeloid differentiation primary response 88 [Source:HGNC Symbol;Acc:7562]		ENSG00000172936	ILMN_1738523
373	2.74205	I	24	MYD88	myeloid differentiation primary response 88 [Source:HGNC Symbol;Acc:7562]		ENSG00000172936	ILMN_1738523
374	3.53103	I	6	MYD88	myeloid differentiation primary response 88 [Source:HGNC Symbol;Acc:7562]		ENSG00000172936	ILMN_1738523
375	3.79298	I	6	MYD88	myeloid differentiation primary response 88 [Source:HGNC Symbol;Acc:7562]		ENSG00000172936	ILMN_1738523
376	2.17455	I	24	MYD88	myeloid differentiation primary response 88 [Source:HGNC Symbol;Acc:7562]		ENSG00000172936	ILMN_1738523
147	4.31102	I	4	MYD88	myeloid differentiation primary response 88 [Source:HGNC Symbol;Acc:7562]		ENSG00000172936	A_23_P92140
143	2.55497	I	6	MYD88	myeloid differentiation primary response 88 [Source:HGNC Symbol;Acc:7562]		ENSG00000172936	8078729
301	2.86472	I	6	MYD88	myeloid differentiation primary response 88 [Source:HGNC Symbol;Acc:7562]		ENSG00000172936	8078729
307	2.20046	II	48	MYD88	myeloid differentiation primary response 88 [Source:HGNC Symbol;Acc:7562]		ENSG00000172936	8078729
311	2.63909	II	24	MYO1G	myosin IG [Source:HGNC Symbol;Acc:13880]	BAB84876	ENSG00000136286	227799_at
313	2.27182	II	72	MYO1G	myosin IG [Source:HGNC Symbol;Acc:13880]	BAB84876	ENSG00000136286	227799_at
144	13.0628	II	24	MYO1G	myosin IG [Source:HGNC Symbol;Acc:13880]	BAB84876	ENSG00000136286	244654_at
183	2.16134	II	24	MYO1G	myosin IG [Source:HGNC Symbol;Acc:13880]	BAB84876	ENSG00000136286	244654_at
74	2.68123	I	16	MYO1G	myosin IG [Source:HGNC Symbol;Acc:13880]	BAB84876	ENSG00000136286	ILMN_1692295
124	4.79327	II	168	MYO1G	myosin IG [Source:HGNC Symbol;Acc:13880]	BAB84876	ENSG00000136286	ILMN_1692295
126	63.5371	II	24	MYO1G	myosin IG [Source:HGNC Symbol;Acc:13880]	BAB84876	ENSG00000136286	A_24_P206343
318	2.23366	II	6	MYO1G	myosin IG [Source:HGNC Symbol;Acc:13880]	BAB84876	ENSG00000136286	A_24_P206343
318	2.31853	II	6	MYO1G	myosin IG [Source:HGNC Symbol;Acc:13880]	BAB84876	ENSG00000136286	A_23_P257542
144	8.94473	II	24	NCF2	neutrophil cytosolic factor 2 [Source:HGNC Symbol;Acc:7661]		ENSG00000116701	209949_at
295	2.20785	II	24	NCF2	neutrophil cytosolic factor 2 [Source:HGNC Symbol;Acc:7661]		ENSG00000116701	209949_at
126	6.68845	II	24	NOD2	nucleotide-binding oligomerization domain containing 2 [Source:HGNC Symbol;Acc:5331]		ENSG00000167207	A_23_P420863
146	4.42051	II	4	NOD2	nucleotide-binding oligomerization domain containing 2 [Source:HGNC Symbol;Acc:5331]		ENSG00000167207	A_23_P420863
147	4.78121	I	4	NOD2	nucleotide-binding oligomerization domain containing 2 [Source:HGNC Symbol;Acc:5331]		ENSG00000167207	A_23_P420863
173	2.74901	II	20	NOD2	nucleotide-binding oligomerization domain containing 2 [Source:HGNC Symbol;Acc:5331]		ENSG00000167207	A_23_P420863
174	2.91284	II	20	NOD2	nucleotide-binding oligomerization domain containing 2 [Source:HGNC Symbol;Acc:5331]		ENSG00000167207	A_23_P420863
293	9.49901	II	24	NOD2	nucleotide-binding oligomerization domain containing 2 [Source:HGNC Symbol;Acc:5331]		ENSG00000167207	A_23_P420863
318	4.987	II	6	NOD2	nucleotide-binding oligomerization domain containing 2 [Source:HGNC Symbol;Acc:5331]		ENSG00000167207	A_23_P420863
319	2.54798	II	18	NOD2	nucleotide-binding oligomerization domain containing 2 [Source:HGNC Symbol;Acc:5331]		ENSG00000167207	A_23_P420863
146	3.82613	II	4	NOD2	nucleotide-binding oligomerization domain containing 2 [Source:HGNC Symbol;Acc:5331]		ENSG00000167207	A_23_P77389
147	4.12378	I	4	NOD2	nucleotide-binding oligomerization domain containing 2 [Source:HGNC Symbol;Acc:5331]		ENSG00000167207	A_23_P77389
319	2.53674	II	18	NOD2	nucleotide-binding oligomerization domain containing 2 [Source:HGNC Symbol;Acc:5331]		ENSG00000167207	A_23_P77389
63	50.7222	II	6	NOD2	nucleotide-binding oligomerization domain containing 2 [Source:HGNC Symbol;Acc:5331]		ENSG00000167207	220066_at
64	38.4503	II	24	NOD2	nucleotide-binding oligomerization domain containing 2 [Source:HGNC Symbol;Acc:5331]		ENSG00000167207	220066_at
67	2.34334	I	6	NOD2	nucleotide-binding oligomerization domain containing 2 [Source:HGNC Symbol;Acc:5331]		ENSG00000167207	220066_at
183	5.21117	II	24	NOD2	nucleotide-binding oligomerization domain containing 2 [Source:HGNC Symbol;Acc:5331]		ENSG00000167207	220066_at
184	4.67453	II	24	NOD2	nucleotide-binding oligomerization domain containing 2 [Source:HGNC Symbol;Acc:5331]		ENSG00000167207	220066_at
311	3.11798	II	24	NOD2	nucleotide-binding oligomerization domain containing 2 [Source:HGNC Symbol;Acc:5331]		ENSG00000167207	220066_at
312	5.36986	II	144	NOD2	nucleotide-binding oligomerization domain containing 2 [Source:HGNC Symbol;Acc:5331]		ENSG00000167207	220066_at
313	8.4003	II	72	NOD2	nucleotide-binding oligomerization domain containing 2 [Source:HGNC Symbol;Acc:5331]		ENSG00000167207	220066_at
74	2.3019	I	16	NOD2	nucleotide-binding oligomerization domain containing 2 [Source:HGNC Symbol;Acc:5331]		ENSG00000167207	ILMN_1762594
163	2.04191	I	3	NOD2	nucleotide-binding oligomerization domain containing 2 [Source:HGNC Symbol;Acc:5331]		ENSG00000167207	ILMN_1762594
301	2.51107	I	6	NOD2	nucleotide-binding oligomerization domain containing 2 [Source:HGNC Symbol;Acc:5331]		ENSG00000167207	7995539
307	4.41629	II	48	NOD2	nucleotide-binding oligomerization domain containing 2 [Source:HGNC Symbol;Acc:5331]		ENSG00000167207	7995539
146	2.36361	II	4	NUDCD1	NudC domain containing 1 [Source:HGNC Symbol;Acc:24306]		ENSG00000120526	A_23_P123343
147	4.08082	I	4	NUDCD1	NudC domain containing 1 [Source:HGNC Symbol;Acc:24306]		ENSG00000120526	A_23_P123343
319	2.25305	II	18	NUDCD1	NudC domain containing 1 [Source:HGNC Symbol;Acc:24306]		ENSG00000120526	A_23_P123343
144	2.83917	II	24	NUDCD1	NudC domain containing 1 [Source:HGNC Symbol;Acc:24306]		ENSG00000120526	225439_at
300	2.05353	I	6	NUDCD1	NudC domain containing 1 [Source:HGNC Symbol;Acc:24306]		ENSG00000120526	225439_at
305	4.38605	II	1.5	NUDCD1	NudC domain containing 1 [Source:HGNC Symbol;Acc:24306]		ENSG00000120526	225439_at
306	2.96113	I	1.5	NUDCD1	NudC domain containing 1 [Source:HGNC Symbol;Acc:24306]		ENSG00000120526	225439_at
305	2.84306	II	1.5	NUDCD1	NudC domain containing 1 [Source:HGNC Symbol;Acc:24306]		ENSG00000120526	225438_at
129	2.0167	I	10	NUDCD1	NudC domain containing 1 [Source:HGNC Symbol;Acc:24306]		ENSG00000120526	ILMN_1678745
275	2.07548	I	8	NUDCD1	NudC domain containing 1 [Source:HGNC Symbol;Acc:24306]		ENSG00000120526	ILMN_1678745
277	2.13095	I	8	NUDCD1	NudC domain containing 1 [Source:HGNC Symbol;Acc:24306]		ENSG00000120526	ILMN_1678745
201	2.04846	I	2	NUDCD1	NudC domain containing 1 [Source:HGNC Symbol;Acc:24306]		ENSG00000120526	8152340
307	3.19489	II	48	NUDCD1	NudC domain containing 1 [Source:HGNC Symbol;Acc:24306]		ENSG00000120526	8152340
308	2.99784	II	48	NUDCD1	NudC domain containing 1 [Source:HGNC Symbol;Acc:24306]		ENSG00000120526	8152340
53	5.37941	III	6	OAS1	2'-5'-oligoadenylate synthetase 1, 40/46kDa [Source:HGNC Symbol;Acc:8086]		ENSG00000089127	A_23_P64828
59	4.53866	III	6	OAS1	2'-5'-oligoadenylate synthetase 1, 40/46kDa [Source:HGNC Symbol;Acc:8086]		ENSG00000089127	A_23_P64828
125	35.6381	I	3	OAS1	2'-5'-oligoadenylate synthetase 1, 40/46kDa [Source:HGNC Symbol;Acc:8086]		ENSG00000089127	A_23_P64828
126	5.98905	II	24	OAS1	2'-5'-oligoadenylate synthetase 1, 40/46kDa [Source:HGNC Symbol;Acc:8086]		ENSG00000089127	A_23_P64828
147	6.64744	I	4	OAS1	2'-5'-oligoadenylate synthetase 1, 40/46kDa [Source:HGNC Symbol;Acc:8086]		ENSG00000089127	A_23_P64828
148	2.89123	I	6	OAS1	2'-5'-oligoadenylate synthetase 1, 40/46kDa [Source:HGNC Symbol;Acc:8086]		ENSG00000089127	A_23_P64828
173	2.51352	II	20	OAS1	2'-5'-oligoadenylate synthetase 1, 40/46kDa [Source:HGNC Symbol;Acc:8086]		ENSG00000089127	A_23_P64828
174	3.12379	II	20	OAS1	2'-5'-oligoadenylate synthetase 1, 40/46kDa [Source:HGNC Symbol;Acc:8086]		ENSG00000089127	A_23_P64828
192	9.19863	I	6	OAS1	2'-5'-oligoadenylate synthetase 1, 40/46kDa [Source:HGNC Symbol;Acc:8086]		ENSG00000089127	A_23_P64828
193	21.3878	I	12	OAS1	2'-5'-oligoadenylate synthetase 1, 40/46kDa [Source:HGNC Symbol;Acc:8086]		ENSG00000089127	A_23_P64828
226	29.9422	I	6	OAS1	2'-5'-oligoadenylate synthetase 1, 40/46kDa [Source:HGNC Symbol;Acc:8086]		ENSG00000089127	A_23_P64828
227	28.7017	I	12	OAS1	2'-5'-oligoadenylate synthetase 1, 40/46kDa [Source:HGNC Symbol;Acc:8086]		ENSG00000089127	A_23_P64828
228	16.8815	I	18	OAS1	2'-5'-oligoadenylate synthetase 1, 40/46kDa [Source:HGNC Symbol;Acc:8086]		ENSG00000089127	A_23_P64828
293	52.3689	II	24	OAS1	2'-5'-oligoadenylate synthetase 1, 40/46kDa [Source:HGNC Symbol;Acc:8086]		ENSG00000089127	A_23_P64828
294	146.851	I	72	OAS1	2'-5'-oligoadenylate synthetase 1, 40/46kDa [Source:HGNC Symbol;Acc:8086]		ENSG00000089127	A_23_P64828
318	4.5966	II	6	OAS1	2'-5'-oligoadenylate synthetase 1, 40/46kDa [Source:HGNC Symbol;Acc:8086]		ENSG00000089127	A_23_P64828
319	2.45735	II	18	OAS1	2'-5'-oligoadenylate synthetase 1, 40/46kDa [Source:HGNC Symbol;Acc:8086]		ENSG00000089127	A_23_P64828
12	5.05515	II	24	OAS1	2'-5'-oligoadenylate synthetase 1, 40/46kDa [Source:HGNC Symbol;Acc:8086]		ENSG00000089127	205552_s_at
14	16.827	I	24	OAS1	2'-5'-oligoadenylate synthetase 1, 40/46kDa [Source:HGNC Symbol;Acc:8086]		ENSG00000089127	205552_s_at
15	13.7441	I	6	OAS1	2'-5'-oligoadenylate synthetase 1, 40/46kDa [Source:HGNC Symbol;Acc:8086]		ENSG00000089127	205552_s_at
20	12.3628	I	72	OAS1	2'-5'-oligoadenylate synthetase 1, 40/46kDa [Source:HGNC Symbol;Acc:8086]		ENSG00000089127	205552_s_at
21	101.864	I	18	OAS1	2'-5'-oligoadenylate synthetase 1, 40/46kDa [Source:HGNC Symbol;Acc:8086]		ENSG00000089127	205552_s_at
22	136.055	I	12	OAS1	2'-5'-oligoadenylate synthetase 1, 40/46kDa [Source:HGNC Symbol;Acc:8086]		ENSG00000089127	205552_s_at
23	108.782	I	8	OAS1	2'-5'-oligoadenylate synthetase 1, 40/46kDa [Source:HGNC Symbol;Acc:8086]		ENSG00000089127	205552_s_at
24	74.1831	I	6	OAS1	2'-5'-oligoadenylate synthetase 1, 40/46kDa [Source:HGNC Symbol;Acc:8086]		ENSG00000089127	205552_s_at
25	24.4479	I	4	OAS1	2'-5'-oligoadenylate synthetase 1, 40/46kDa [Source:HGNC Symbol;Acc:8086]		ENSG00000089127	205552_s_at
26	4.60923	I	2	OAS1	2'-5'-oligoadenylate synthetase 1, 40/46kDa [Source:HGNC Symbol;Acc:8086]		ENSG00000089127	205552_s_at
38	15.1546	I	5	OAS1	2'-5'-oligoadenylate synthetase 1, 40/46kDa [Source:HGNC Symbol;Acc:8086]		ENSG00000089127	205552_s_at
39	10.3648	II	5	OAS1	2'-5'-oligoadenylate synthetase 1, 40/46kDa [Source:HGNC Symbol;Acc:8086]		ENSG00000089127	205552_s_at
40	120.196	I	5	OAS1	2'-5'-oligoadenylate synthetase 1, 40/46kDa [Source:HGNC Symbol;Acc:8086]		ENSG00000089127	205552_s_at
41	125.617	I	5	OAS1	2'-5'-oligoadenylate synthetase 1, 40/46kDa [Source:HGNC Symbol;Acc:8086]		ENSG00000089127	205552_s_at
43	27.7937	I	12	OAS1	2'-5'-oligoadenylate synthetase 1, 40/46kDa [Source:HGNC Symbol;Acc:8086]		ENSG00000089127	205552_s_at
44	38.8422	I	6	OAS1	2'-5'-oligoadenylate synthetase 1, 40/46kDa [Source:HGNC Symbol;Acc:8086]		ENSG00000089127	205552_s_at
45	17.4797	I	12	OAS1	2'-5'-oligoadenylate synthetase 1, 40/46kDa [Source:HGNC Symbol;Acc:8086]		ENSG00000089127	205552_s_at
46	16.8582	I	6	OAS1	2'-5'-oligoadenylate synthetase 1, 40/46kDa [Source:HGNC Symbol;Acc:8086]		ENSG00000089127	205552_s_at
47	71.9634	I	5	OAS1	2'-5'-oligoadenylate synthetase 1, 40/46kDa [Source:HGNC Symbol;Acc:8086]		ENSG00000089127	205552_s_at
48	21.8931	I	5	OAS1	2'-5'-oligoadenylate synthetase 1, 40/46kDa [Source:HGNC Symbol;Acc:8086]		ENSG00000089127	205552_s_at
60	5.76005	I	24	OAS1	2'-5'-oligoadenylate synthetase 1, 40/46kDa [Source:HGNC Symbol;Acc:8086]		ENSG00000089127	205552_s_at
61	6.69091	I	72	OAS1	2'-5'-oligoadenylate synthetase 1, 40/46kDa [Source:HGNC Symbol;Acc:8086]		ENSG00000089127	205552_s_at
63	2.09097	II	6	OAS1	2'-5'-oligoadenylate synthetase 1, 40/46kDa [Source:HGNC Symbol;Acc:8086]		ENSG00000089127	205552_s_at
67	3.49264	I	6	OAS1	2'-5'-oligoadenylate synthetase 1, 40/46kDa [Source:HGNC Symbol;Acc:8086]		ENSG00000089127	205552_s_at
68	2.06642	II	96	OAS1	2'-5'-oligoadenylate synthetase 1, 40/46kDa [Source:HGNC Symbol;Acc:8086]		ENSG00000089127	205552_s_at
150	2.15069	I	24	OAS1	2'-5'-oligoadenylate synthetase 1, 40/46kDa [Source:HGNC Symbol;Acc:8086]		ENSG00000089127	205552_s_at
177	30.159	I	48	OAS1	2'-5'-oligoadenylate synthetase 1, 40/46kDa [Source:HGNC Symbol;Acc:8086]		ENSG00000089127	205552_s_at
178	8.0935	I	48	OAS1	2'-5'-oligoadenylate synthetase 1, 40/46kDa [Source:HGNC Symbol;Acc:8086]		ENSG00000089127	205552_s_at
179	7.92864	I	48	OAS1	2'-5'-oligoadenylate synthetase 1, 40/46kDa [Source:HGNC Symbol;Acc:8086]		ENSG00000089127	205552_s_at
183	3.2088	II	24	OAS1	2'-5'-oligoadenylate synthetase 1, 40/46kDa [Source:HGNC Symbol;Acc:8086]		ENSG00000089127	205552_s_at
184	2.70371	II	24	OAS1	2'-5'-oligoadenylate synthetase 1, 40/46kDa [Source:HGNC Symbol;Acc:8086]		ENSG00000089127	205552_s_at
185	4.37258	I	16	OAS1	2'-5'-oligoadenylate synthetase 1, 40/46kDa [Source:HGNC Symbol;Acc:8086]		ENSG00000089127	205552_s_at
186	6.8198	I	48	OAS1	2'-5'-oligoadenylate synthetase 1, 40/46kDa [Source:HGNC Symbol;Acc:8086]		ENSG00000089127	205552_s_at
187	4.65542	I	96	OAS1	2'-5'-oligoadenylate synthetase 1, 40/46kDa [Source:HGNC Symbol;Acc:8086]		ENSG00000089127	205552_s_at
188	2.69346	I	144	OAS1	2'-5'-oligoadenylate synthetase 1, 40/46kDa [Source:HGNC Symbol;Acc:8086]		ENSG00000089127	205552_s_at
295	6.73315	II	24	OAS1	2'-5'-oligoadenylate synthetase 1, 40/46kDa [Source:HGNC Symbol;Acc:8086]		ENSG00000089127	205552_s_at
298	24.4492	II	24	OAS1	2'-5'-oligoadenylate synthetase 1, 40/46kDa [Source:HGNC Symbol;Acc:8086]		ENSG00000089127	205552_s_at
300	9.79426	I	6	OAS1	2'-5'-oligoadenylate synthetase 1, 40/46kDa [Source:HGNC Symbol;Acc:8086]		ENSG00000089127	205552_s_at
305	2.70069	II	1.5	OAS1	2'-5'-oligoadenylate synthetase 1, 40/46kDa [Source:HGNC Symbol;Acc:8086]		ENSG00000089127	205552_s_at
306	4.94676	I	1.5	OAS1	2'-5'-oligoadenylate synthetase 1, 40/46kDa [Source:HGNC Symbol;Acc:8086]		ENSG00000089127	205552_s_at
311	3.50933	II	24	OAS1	2'-5'-oligoadenylate synthetase 1, 40/46kDa [Source:HGNC Symbol;Acc:8086]		ENSG00000089127	205552_s_at
313	2.62059	II	72	OAS1	2'-5'-oligoadenylate synthetase 1, 40/46kDa [Source:HGNC Symbol;Acc:8086]		ENSG00000089127	205552_s_at
12	3.51071	II	24	OAS1	2'-5'-oligoadenylate synthetase 1, 40/46kDa [Source:HGNC Symbol;Acc:8086]		ENSG00000089127	202869_at
14	13.3432	I	24	OAS1	2'-5'-oligoadenylate synthetase 1, 40/46kDa [Source:HGNC Symbol;Acc:8086]		ENSG00000089127	202869_at
15	15.0627	I	6	OAS1	2'-5'-oligoadenylate synthetase 1, 40/46kDa [Source:HGNC Symbol;Acc:8086]		ENSG00000089127	202869_at
20	12.2361	I	72	OAS1	2'-5'-oligoadenylate synthetase 1, 40/46kDa [Source:HGNC Symbol;Acc:8086]		ENSG00000089127	202869_at
21	91.0715	I	18	OAS1	2'-5'-oligoadenylate synthetase 1, 40/46kDa [Source:HGNC Symbol;Acc:8086]		ENSG00000089127	202869_at
22	73.4874	I	12	OAS1	2'-5'-oligoadenylate synthetase 1, 40/46kDa [Source:HGNC Symbol;Acc:8086]		ENSG00000089127	202869_at
23	73.5435	I	8	OAS1	2'-5'-oligoadenylate synthetase 1, 40/46kDa [Source:HGNC Symbol;Acc:8086]		ENSG00000089127	202869_at
24	49.0831	I	6	OAS1	2'-5'-oligoadenylate synthetase 1, 40/46kDa [Source:HGNC Symbol;Acc:8086]		ENSG00000089127	202869_at
25	25.471	I	4	OAS1	2'-5'-oligoadenylate synthetase 1, 40/46kDa [Source:HGNC Symbol;Acc:8086]		ENSG00000089127	202869_at
26	6.21646	I	2	OAS1	2'-5'-oligoadenylate synthetase 1, 40/46kDa [Source:HGNC Symbol;Acc:8086]		ENSG00000089127	202869_at
38	60.728	I	5	OAS1	2'-5'-oligoadenylate synthetase 1, 40/46kDa [Source:HGNC Symbol;Acc:8086]		ENSG00000089127	202869_at
39	8.01106	II	5	OAS1	2'-5'-oligoadenylate synthetase 1, 40/46kDa [Source:HGNC Symbol;Acc:8086]		ENSG00000089127	202869_at
40	163.569	I	5	OAS1	2'-5'-oligoadenylate synthetase 1, 40/46kDa [Source:HGNC Symbol;Acc:8086]		ENSG00000089127	202869_at
41	120.57	I	5	OAS1	2'-5'-oligoadenylate synthetase 1, 40/46kDa [Source:HGNC Symbol;Acc:8086]		ENSG00000089127	202869_at
43	21.2566	I	12	OAS1	2'-5'-oligoadenylate synthetase 1, 40/46kDa [Source:HGNC Symbol;Acc:8086]		ENSG00000089127	202869_at
44	45.9564	I	6	OAS1	2'-5'-oligoadenylate synthetase 1, 40/46kDa [Source:HGNC Symbol;Acc:8086]		ENSG00000089127	202869_at
45	13.4683	I	12	OAS1	2'-5'-oligoadenylate synthetase 1, 40/46kDa [Source:HGNC Symbol;Acc:8086]		ENSG00000089127	202869_at
46	18.0552	I	6	OAS1	2'-5'-oligoadenylate synthetase 1, 40/46kDa [Source:HGNC Symbol;Acc:8086]		ENSG00000089127	202869_at
47	47.3057	I	5	OAS1	2'-5'-oligoadenylate synthetase 1, 40/46kDa [Source:HGNC Symbol;Acc:8086]		ENSG00000089127	202869_at
48	25.5316	I	5	OAS1	2'-5'-oligoadenylate synthetase 1, 40/46kDa [Source:HGNC Symbol;Acc:8086]		ENSG00000089127	202869_at
60	5.05396	I	24	OAS1	2'-5'-oligoadenylate synthetase 1, 40/46kDa [Source:HGNC Symbol;Acc:8086]		ENSG00000089127	202869_at
61	5.73435	I	72	OAS1	2'-5'-oligoadenylate synthetase 1, 40/46kDa [Source:HGNC Symbol;Acc:8086]		ENSG00000089127	202869_at
67	2.91323	I	6	OAS1	2'-5'-oligoadenylate synthetase 1, 40/46kDa [Source:HGNC Symbol;Acc:8086]		ENSG00000089127	202869_at
150	2.00896	I	24	OAS1	2'-5'-oligoadenylate synthetase 1, 40/46kDa [Source:HGNC Symbol;Acc:8086]		ENSG00000089127	202869_at
177	34.3852	I	48	OAS1	2'-5'-oligoadenylate synthetase 1, 40/46kDa [Source:HGNC Symbol;Acc:8086]		ENSG00000089127	202869_at
178	6.45408	I	48	OAS1	2'-5'-oligoadenylate synthetase 1, 40/46kDa [Source:HGNC Symbol;Acc:8086]		ENSG00000089127	202869_at
179	6.12161	I	48	OAS1	2'-5'-oligoadenylate synthetase 1, 40/46kDa [Source:HGNC Symbol;Acc:8086]		ENSG00000089127	202869_at
183	2.95589	II	24	OAS1	2'-5'-oligoadenylate synthetase 1, 40/46kDa [Source:HGNC Symbol;Acc:8086]		ENSG00000089127	202869_at
184	2.18457	II	24	OAS1	2'-5'-oligoadenylate synthetase 1, 40/46kDa [Source:HGNC Symbol;Acc:8086]		ENSG00000089127	202869_at
185	3.46674	I	16	OAS1	2'-5'-oligoadenylate synthetase 1, 40/46kDa [Source:HGNC Symbol;Acc:8086]		ENSG00000089127	202869_at
186	4.65465	I	48	OAS1	2'-5'-oligoadenylate synthetase 1, 40/46kDa [Source:HGNC Symbol;Acc:8086]		ENSG00000089127	202869_at
187	3.99388	I	96	OAS1	2'-5'-oligoadenylate synthetase 1, 40/46kDa [Source:HGNC Symbol;Acc:8086]		ENSG00000089127	202869_at
188	2.50757	I	144	OAS1	2'-5'-oligoadenylate synthetase 1, 40/46kDa [Source:HGNC Symbol;Acc:8086]		ENSG00000089127	202869_at
295	5.86175	II	24	OAS1	2'-5'-oligoadenylate synthetase 1, 40/46kDa [Source:HGNC Symbol;Acc:8086]		ENSG00000089127	202869_at
298	45.8107	II	24	OAS1	2'-5'-oligoadenylate synthetase 1, 40/46kDa [Source:HGNC Symbol;Acc:8086]		ENSG00000089127	202869_at
300	5.7698	I	6	OAS1	2'-5'-oligoadenylate synthetase 1, 40/46kDa [Source:HGNC Symbol;Acc:8086]		ENSG00000089127	202869_at
305	4.34297	II	1.5	OAS1	2'-5'-oligoadenylate synthetase 1, 40/46kDa [Source:HGNC Symbol;Acc:8086]		ENSG00000089127	202869_at
306	6.83993	I	1.5	OAS1	2'-5'-oligoadenylate synthetase 1, 40/46kDa [Source:HGNC Symbol;Acc:8086]		ENSG00000089127	202869_at
313	2.44585	II	72	OAS1	2'-5'-oligoadenylate synthetase 1, 40/46kDa [Source:HGNC Symbol;Acc:8086]		ENSG00000089127	202869_at
32	11.4768	I	3	OAS1	2'-5'-oligoadenylate synthetase 1, 40/46kDa [Source:HGNC Symbol;Acc:8086]		ENSG00000089127	38388_at
58	9.80159	I	3	OAS1	2'-5'-oligoadenylate synthetase 1, 40/46kDa [Source:HGNC Symbol;Acc:8086]		ENSG00000089127	38388_at
32	15.8564	I	3	OAS1	2'-5'-oligoadenylate synthetase 1, 40/46kDa [Source:HGNC Symbol;Acc:8086]		ENSG00000089127	38389_at
58	9.81319	I	3	OAS1	2'-5'-oligoadenylate synthetase 1, 40/46kDa [Source:HGNC Symbol;Acc:8086]		ENSG00000089127	38389_at
75	24.553	I	16	OAS1	2'-5'-oligoadenylate synthetase 1, 40/46kDa [Source:HGNC Symbol;Acc:8086]		ENSG00000089127	ILMN_2410826
78	31.8697	I	12	OAS1	2'-5'-oligoadenylate synthetase 1, 40/46kDa [Source:HGNC Symbol;Acc:8086]		ENSG00000089127	ILMN_2410826
79	27.1717	I	24	OAS1	2'-5'-oligoadenylate synthetase 1, 40/46kDa [Source:HGNC Symbol;Acc:8086]		ENSG00000089127	ILMN_2410826
80	17.1812	I	48	OAS1	2'-5'-oligoadenylate synthetase 1, 40/46kDa [Source:HGNC Symbol;Acc:8086]		ENSG00000089127	ILMN_2410826
81	7.40105	I	4	OAS1	2'-5'-oligoadenylate synthetase 1, 40/46kDa [Source:HGNC Symbol;Acc:8086]		ENSG00000089127	ILMN_2410826
82	5.91754	II	12	OAS1	2'-5'-oligoadenylate synthetase 1, 40/46kDa [Source:HGNC Symbol;Acc:8086]		ENSG00000089127	ILMN_2410826
83	8.17741	II	24	OAS1	2'-5'-oligoadenylate synthetase 1, 40/46kDa [Source:HGNC Symbol;Acc:8086]		ENSG00000089127	ILMN_2410826
85	3.4989	II	48	OAS1	2'-5'-oligoadenylate synthetase 1, 40/46kDa [Source:HGNC Symbol;Acc:8086]		ENSG00000089127	ILMN_2410826
128	43.8062	II	10	OAS1	2'-5'-oligoadenylate synthetase 1, 40/46kDa [Source:HGNC Symbol;Acc:8086]		ENSG00000089127	ILMN_2410826
129	239.956	I	10	OAS1	2'-5'-oligoadenylate synthetase 1, 40/46kDa [Source:HGNC Symbol;Acc:8086]		ENSG00000089127	ILMN_2410826
130	194.76	I	10	OAS1	2'-5'-oligoadenylate synthetase 1, 40/46kDa [Source:HGNC Symbol;Acc:8086]		ENSG00000089127	ILMN_2410826
131	35.1267	II	10	OAS1	2'-5'-oligoadenylate synthetase 1, 40/46kDa [Source:HGNC Symbol;Acc:8086]		ENSG00000089127	ILMN_2410826
160	27.5794	I	18	OAS1	2'-5'-oligoadenylate synthetase 1, 40/46kDa [Source:HGNC Symbol;Acc:8086]		ENSG00000089127	ILMN_2410826
200	7.15081	I	10	OAS1	2'-5'-oligoadenylate synthetase 1, 40/46kDa [Source:HGNC Symbol;Acc:8086]		ENSG00000089127	ILMN_2410826
263	2.62419	III	12	OAS1	2'-5'-oligoadenylate synthetase 1, 40/46kDa [Source:HGNC Symbol;Acc:8086]		ENSG00000089127	ILMN_2410826
265	2.08985	III	24	OAS1	2'-5'-oligoadenylate synthetase 1, 40/46kDa [Source:HGNC Symbol;Acc:8086]		ENSG00000089127	ILMN_2410826
275	218.192	I	8	OAS1	2'-5'-oligoadenylate synthetase 1, 40/46kDa [Source:HGNC Symbol;Acc:8086]		ENSG00000089127	ILMN_2410826
277	187.422	I	8	OAS1	2'-5'-oligoadenylate synthetase 1, 40/46kDa [Source:HGNC Symbol;Acc:8086]		ENSG00000089127	ILMN_2410826
278	29.9157	I	2	OAS1	2'-5'-oligoadenylate synthetase 1, 40/46kDa [Source:HGNC Symbol;Acc:8086]		ENSG00000089127	ILMN_2410826
279	7.07568	I	48	OAS1	2'-5'-oligoadenylate synthetase 1, 40/46kDa [Source:HGNC Symbol;Acc:8086]		ENSG00000089127	ILMN_2410826
280	5.58988	I	48	OAS1	2'-5'-oligoadenylate synthetase 1, 40/46kDa [Source:HGNC Symbol;Acc:8086]		ENSG00000089127	ILMN_2410826
281	7.99789	I	48	OAS1	2'-5'-oligoadenylate synthetase 1, 40/46kDa [Source:HGNC Symbol;Acc:8086]		ENSG00000089127	ILMN_2410826
354	4.66079	I	48	OAS1	2'-5'-oligoadenylate synthetase 1, 40/46kDa [Source:HGNC Symbol;Acc:8086]		ENSG00000089127	ILMN_2410826
356	4.89882	I	24	OAS1	2'-5'-oligoadenylate synthetase 1, 40/46kDa [Source:HGNC Symbol;Acc:8086]		ENSG00000089127	ILMN_2410826
358	4.49594	I	12	OAS1	2'-5'-oligoadenylate synthetase 1, 40/46kDa [Source:HGNC Symbol;Acc:8086]		ENSG00000089127	ILMN_2410826
362	5.80534	I	6	OAS1	2'-5'-oligoadenylate synthetase 1, 40/46kDa [Source:HGNC Symbol;Acc:8086]		ENSG00000089127	ILMN_2410826
366	6.4723	I	96	OAS1	2'-5'-oligoadenylate synthetase 1, 40/46kDa [Source:HGNC Symbol;Acc:8086]		ENSG00000089127	ILMN_2410826
373	18.9002	I	24	OAS1	2'-5'-oligoadenylate synthetase 1, 40/46kDa [Source:HGNC Symbol;Acc:8086]		ENSG00000089127	ILMN_2410826
374	12.4527	I	6	OAS1	2'-5'-oligoadenylate synthetase 1, 40/46kDa [Source:HGNC Symbol;Acc:8086]		ENSG00000089127	ILMN_2410826
375	13.3428	I	6	OAS1	2'-5'-oligoadenylate synthetase 1, 40/46kDa [Source:HGNC Symbol;Acc:8086]		ENSG00000089127	ILMN_2410826
376	12.9328	I	24	OAS1	2'-5'-oligoadenylate synthetase 1, 40/46kDa [Source:HGNC Symbol;Acc:8086]		ENSG00000089127	ILMN_2410826
74	5.29037	I	16	OAS1	2'-5'-oligoadenylate synthetase 1, 40/46kDa [Source:HGNC Symbol;Acc:8086]		ENSG00000089127	ILMN_1672606
75	10.2321	I	16	OAS1	2'-5'-oligoadenylate synthetase 1, 40/46kDa [Source:HGNC Symbol;Acc:8086]		ENSG00000089127	ILMN_1672606
78	4.14738	I	12	OAS1	2'-5'-oligoadenylate synthetase 1, 40/46kDa [Source:HGNC Symbol;Acc:8086]		ENSG00000089127	ILMN_1672606
79	4.15938	I	24	OAS1	2'-5'-oligoadenylate synthetase 1, 40/46kDa [Source:HGNC Symbol;Acc:8086]		ENSG00000089127	ILMN_1672606
80	3.40349	I	48	OAS1	2'-5'-oligoadenylate synthetase 1, 40/46kDa [Source:HGNC Symbol;Acc:8086]		ENSG00000089127	ILMN_1672606
81	2.39314	I	4	OAS1	2'-5'-oligoadenylate synthetase 1, 40/46kDa [Source:HGNC Symbol;Acc:8086]		ENSG00000089127	ILMN_1672606
160	6.0422	I	18	OAS1	2'-5'-oligoadenylate synthetase 1, 40/46kDa [Source:HGNC Symbol;Acc:8086]		ENSG00000089127	ILMN_1672606
161	3.20265	I	6	OAS1	2'-5'-oligoadenylate synthetase 1, 40/46kDa [Source:HGNC Symbol;Acc:8086]		ENSG00000089127	ILMN_1672606
275	16.0304	I	8	OAS1	2'-5'-oligoadenylate synthetase 1, 40/46kDa [Source:HGNC Symbol;Acc:8086]		ENSG00000089127	ILMN_1672606
277	15.2948	I	8	OAS1	2'-5'-oligoadenylate synthetase 1, 40/46kDa [Source:HGNC Symbol;Acc:8086]		ENSG00000089127	ILMN_1672606
279	3.79897	I	48	OAS1	2'-5'-oligoadenylate synthetase 1, 40/46kDa [Source:HGNC Symbol;Acc:8086]		ENSG00000089127	ILMN_1672606
280	2.6704	I	48	OAS1	2'-5'-oligoadenylate synthetase 1, 40/46kDa [Source:HGNC Symbol;Acc:8086]		ENSG00000089127	ILMN_1672606
281	3.95803	I	48	OAS1	2'-5'-oligoadenylate synthetase 1, 40/46kDa [Source:HGNC Symbol;Acc:8086]		ENSG00000089127	ILMN_1672606
354	2.14035	I	48	OAS1	2'-5'-oligoadenylate synthetase 1, 40/46kDa [Source:HGNC Symbol;Acc:8086]		ENSG00000089127	ILMN_1672606
358	2.34633	I	12	OAS1	2'-5'-oligoadenylate synthetase 1, 40/46kDa [Source:HGNC Symbol;Acc:8086]		ENSG00000089127	ILMN_1672606
362	2.48327	I	6	OAS1	2'-5'-oligoadenylate synthetase 1, 40/46kDa [Source:HGNC Symbol;Acc:8086]		ENSG00000089127	ILMN_1672606
373	2.30848	I	24	OAS1	2'-5'-oligoadenylate synthetase 1, 40/46kDa [Source:HGNC Symbol;Acc:8086]		ENSG00000089127	ILMN_1672606
374	2.01874	I	6	OAS1	2'-5'-oligoadenylate synthetase 1, 40/46kDa [Source:HGNC Symbol;Acc:8086]		ENSG00000089127	ILMN_1672606
375	2.34161	I	6	OAS1	2'-5'-oligoadenylate synthetase 1, 40/46kDa [Source:HGNC Symbol;Acc:8086]		ENSG00000089127	ILMN_1672606
75	27.5582	I	16	OAS1	2'-5'-oligoadenylate synthetase 1, 40/46kDa [Source:HGNC Symbol;Acc:8086]		ENSG00000089127	ILMN_1675640
78	19.4464	I	12	OAS1	2'-5'-oligoadenylate synthetase 1, 40/46kDa [Source:HGNC Symbol;Acc:8086]		ENSG00000089127	ILMN_1675640
79	15.797	I	24	OAS1	2'-5'-oligoadenylate synthetase 1, 40/46kDa [Source:HGNC Symbol;Acc:8086]		ENSG00000089127	ILMN_1675640
80	13.2103	I	48	OAS1	2'-5'-oligoadenylate synthetase 1, 40/46kDa [Source:HGNC Symbol;Acc:8086]		ENSG00000089127	ILMN_1675640
81	5.48107	I	4	OAS1	2'-5'-oligoadenylate synthetase 1, 40/46kDa [Source:HGNC Symbol;Acc:8086]		ENSG00000089127	ILMN_1675640
82	4.04611	II	12	OAS1	2'-5'-oligoadenylate synthetase 1, 40/46kDa [Source:HGNC Symbol;Acc:8086]		ENSG00000089127	ILMN_1675640
83	5.39449	II	24	OAS1	2'-5'-oligoadenylate synthetase 1, 40/46kDa [Source:HGNC Symbol;Acc:8086]		ENSG00000089127	ILMN_1675640
85	2.63306	II	48	OAS1	2'-5'-oligoadenylate synthetase 1, 40/46kDa [Source:HGNC Symbol;Acc:8086]		ENSG00000089127	ILMN_1675640
128	22.729	II	10	OAS1	2'-5'-oligoadenylate synthetase 1, 40/46kDa [Source:HGNC Symbol;Acc:8086]		ENSG00000089127	ILMN_1675640
129	146.536	I	10	OAS1	2'-5'-oligoadenylate synthetase 1, 40/46kDa [Source:HGNC Symbol;Acc:8086]		ENSG00000089127	ILMN_1675640
130	113.522	I	10	OAS1	2'-5'-oligoadenylate synthetase 1, 40/46kDa [Source:HGNC Symbol;Acc:8086]		ENSG00000089127	ILMN_1675640
131	13.9203	II	10	OAS1	2'-5'-oligoadenylate synthetase 1, 40/46kDa [Source:HGNC Symbol;Acc:8086]		ENSG00000089127	ILMN_1675640
160	25.5812	I	18	OAS1	2'-5'-oligoadenylate synthetase 1, 40/46kDa [Source:HGNC Symbol;Acc:8086]		ENSG00000089127	ILMN_1675640
161	10.643	I	6	OAS1	2'-5'-oligoadenylate synthetase 1, 40/46kDa [Source:HGNC Symbol;Acc:8086]		ENSG00000089127	ILMN_1675640
162	2.00167	II	6	OAS1	2'-5'-oligoadenylate synthetase 1, 40/46kDa [Source:HGNC Symbol;Acc:8086]		ENSG00000089127	ILMN_1675640
163	7.9088	I	3	OAS1	2'-5'-oligoadenylate synthetase 1, 40/46kDa [Source:HGNC Symbol;Acc:8086]		ENSG00000089127	ILMN_1675640
200	7.16634	I	10	OAS1	2'-5'-oligoadenylate synthetase 1, 40/46kDa [Source:HGNC Symbol;Acc:8086]		ENSG00000089127	ILMN_1675640
249	24.5069	I	12	OAS1	2'-5'-oligoadenylate synthetase 1, 40/46kDa [Source:HGNC Symbol;Acc:8086]		ENSG00000089127	ILMN_1675640
251	26.842	I	24	OAS1	2'-5'-oligoadenylate synthetase 1, 40/46kDa [Source:HGNC Symbol;Acc:8086]		ENSG00000089127	ILMN_1675640
253	5.09978	I	4	OAS1	2'-5'-oligoadenylate synthetase 1, 40/46kDa [Source:HGNC Symbol;Acc:8086]		ENSG00000089127	ILMN_1675640
254	11.6818	I	6	OAS1	2'-5'-oligoadenylate synthetase 1, 40/46kDa [Source:HGNC Symbol;Acc:8086]		ENSG00000089127	ILMN_1675640
257	3.29047	III	12	OAS1	2'-5'-oligoadenylate synthetase 1, 40/46kDa [Source:HGNC Symbol;Acc:8086]		ENSG00000089127	ILMN_1675640
261	2.15583	III	6	OAS1	2'-5'-oligoadenylate synthetase 1, 40/46kDa [Source:HGNC Symbol;Acc:8086]		ENSG00000089127	ILMN_1675640
275	66.7298	I	8	OAS1	2'-5'-oligoadenylate synthetase 1, 40/46kDa [Source:HGNC Symbol;Acc:8086]		ENSG00000089127	ILMN_1675640
277	70.8667	I	8	OAS1	2'-5'-oligoadenylate synthetase 1, 40/46kDa [Source:HGNC Symbol;Acc:8086]		ENSG00000089127	ILMN_1675640
278	10.9579	I	2	OAS1	2'-5'-oligoadenylate synthetase 1, 40/46kDa [Source:HGNC Symbol;Acc:8086]		ENSG00000089127	ILMN_1675640
279	6.60679	I	48	OAS1	2'-5'-oligoadenylate synthetase 1, 40/46kDa [Source:HGNC Symbol;Acc:8086]		ENSG00000089127	ILMN_1675640
280	5.4892	I	48	OAS1	2'-5'-oligoadenylate synthetase 1, 40/46kDa [Source:HGNC Symbol;Acc:8086]		ENSG00000089127	ILMN_1675640
281	7.93993	I	48	OAS1	2'-5'-oligoadenylate synthetase 1, 40/46kDa [Source:HGNC Symbol;Acc:8086]		ENSG00000089127	ILMN_1675640
347	8.07497	I	6	OAS1	2'-5'-oligoadenylate synthetase 1, 40/46kDa [Source:HGNC Symbol;Acc:8086]		ENSG00000089127	ILMN_1675640
348	4.00112	I	4	OAS1	2'-5'-oligoadenylate synthetase 1, 40/46kDa [Source:HGNC Symbol;Acc:8086]		ENSG00000089127	ILMN_1675640
352	8.74793	I	12	OAS1	2'-5'-oligoadenylate synthetase 1, 40/46kDa [Source:HGNC Symbol;Acc:8086]		ENSG00000089127	ILMN_1675640
353	3.9875	I	24	OAS1	2'-5'-oligoadenylate synthetase 1, 40/46kDa [Source:HGNC Symbol;Acc:8086]		ENSG00000089127	ILMN_1675640
354	4.97607	I	48	OAS1	2'-5'-oligoadenylate synthetase 1, 40/46kDa [Source:HGNC Symbol;Acc:8086]		ENSG00000089127	ILMN_1675640
356	4.33453	I	24	OAS1	2'-5'-oligoadenylate synthetase 1, 40/46kDa [Source:HGNC Symbol;Acc:8086]		ENSG00000089127	ILMN_1675640
358	4.38863	I	12	OAS1	2'-5'-oligoadenylate synthetase 1, 40/46kDa [Source:HGNC Symbol;Acc:8086]		ENSG00000089127	ILMN_1675640
362	4.73203	I	6	OAS1	2'-5'-oligoadenylate synthetase 1, 40/46kDa [Source:HGNC Symbol;Acc:8086]		ENSG00000089127	ILMN_1675640
366	4.33698	I	96	OAS1	2'-5'-oligoadenylate synthetase 1, 40/46kDa [Source:HGNC Symbol;Acc:8086]		ENSG00000089127	ILMN_1675640
373	15.785	I	24	OAS1	2'-5'-oligoadenylate synthetase 1, 40/46kDa [Source:HGNC Symbol;Acc:8086]		ENSG00000089127	ILMN_1675640
374	11.4207	I	6	OAS1	2'-5'-oligoadenylate synthetase 1, 40/46kDa [Source:HGNC Symbol;Acc:8086]		ENSG00000089127	ILMN_1675640
375	11.9126	I	6	OAS1	2'-5'-oligoadenylate synthetase 1, 40/46kDa [Source:HGNC Symbol;Acc:8086]		ENSG00000089127	ILMN_1675640
376	11.1213	I	24	OAS1	2'-5'-oligoadenylate synthetase 1, 40/46kDa [Source:HGNC Symbol;Acc:8086]		ENSG00000089127	ILMN_1675640
78	21.0279	I	12	OAS1	2'-5'-oligoadenylate synthetase 1, 40/46kDa [Source:HGNC Symbol;Acc:8086]		ENSG00000089127	ILMN_1658247
79	18.5037	I	24	OAS1	2'-5'-oligoadenylate synthetase 1, 40/46kDa [Source:HGNC Symbol;Acc:8086]		ENSG00000089127	ILMN_1658247
80	12.5757	I	48	OAS1	2'-5'-oligoadenylate synthetase 1, 40/46kDa [Source:HGNC Symbol;Acc:8086]		ENSG00000089127	ILMN_1658247
81	5.51762	I	4	OAS1	2'-5'-oligoadenylate synthetase 1, 40/46kDa [Source:HGNC Symbol;Acc:8086]		ENSG00000089127	ILMN_1658247
82	4.10619	II	12	OAS1	2'-5'-oligoadenylate synthetase 1, 40/46kDa [Source:HGNC Symbol;Acc:8086]		ENSG00000089127	ILMN_1658247
83	5.47982	II	24	OAS1	2'-5'-oligoadenylate synthetase 1, 40/46kDa [Source:HGNC Symbol;Acc:8086]		ENSG00000089127	ILMN_1658247
85	2.44173	II	48	OAS1	2'-5'-oligoadenylate synthetase 1, 40/46kDa [Source:HGNC Symbol;Acc:8086]		ENSG00000089127	ILMN_1658247
130	32.0857	I	10	OAS1	2'-5'-oligoadenylate synthetase 1, 40/46kDa [Source:HGNC Symbol;Acc:8086]		ENSG00000089127	ILMN_1658247
131	11.0059	II	10	OAS1	2'-5'-oligoadenylate synthetase 1, 40/46kDa [Source:HGNC Symbol;Acc:8086]		ENSG00000089127	ILMN_1658247
160	15.7449	I	18	OAS1	2'-5'-oligoadenylate synthetase 1, 40/46kDa [Source:HGNC Symbol;Acc:8086]		ENSG00000089127	ILMN_1658247
161	4.21199	I	6	OAS1	2'-5'-oligoadenylate synthetase 1, 40/46kDa [Source:HGNC Symbol;Acc:8086]		ENSG00000089127	ILMN_1658247
163	7.06494	I	3	OAS1	2'-5'-oligoadenylate synthetase 1, 40/46kDa [Source:HGNC Symbol;Acc:8086]		ENSG00000089127	ILMN_1658247
200	7.55941	I	10	OAS1	2'-5'-oligoadenylate synthetase 1, 40/46kDa [Source:HGNC Symbol;Acc:8086]		ENSG00000089127	ILMN_1658247
249	32.7855	I	12	OAS1	2'-5'-oligoadenylate synthetase 1, 40/46kDa [Source:HGNC Symbol;Acc:8086]		ENSG00000089127	ILMN_1658247
251	32.5717	I	24	OAS1	2'-5'-oligoadenylate synthetase 1, 40/46kDa [Source:HGNC Symbol;Acc:8086]		ENSG00000089127	ILMN_1658247
253	4.83004	I	4	OAS1	2'-5'-oligoadenylate synthetase 1, 40/46kDa [Source:HGNC Symbol;Acc:8086]		ENSG00000089127	ILMN_1658247
254	12.3008	I	6	OAS1	2'-5'-oligoadenylate synthetase 1, 40/46kDa [Source:HGNC Symbol;Acc:8086]		ENSG00000089127	ILMN_1658247
257	3.46622	III	12	OAS1	2'-5'-oligoadenylate synthetase 1, 40/46kDa [Source:HGNC Symbol;Acc:8086]		ENSG00000089127	ILMN_1658247
261	2.13631	III	6	OAS1	2'-5'-oligoadenylate synthetase 1, 40/46kDa [Source:HGNC Symbol;Acc:8086]		ENSG00000089127	ILMN_1658247
263	2.53462	III	12	OAS1	2'-5'-oligoadenylate synthetase 1, 40/46kDa [Source:HGNC Symbol;Acc:8086]		ENSG00000089127	ILMN_1658247
265	2.24488	III	24	OAS1	2'-5'-oligoadenylate synthetase 1, 40/46kDa [Source:HGNC Symbol;Acc:8086]		ENSG00000089127	ILMN_1658247
275	3.78845	I	8	OAS1	2'-5'-oligoadenylate synthetase 1, 40/46kDa [Source:HGNC Symbol;Acc:8086]		ENSG00000089127	ILMN_1658247
277	33.5703	I	8	OAS1	2'-5'-oligoadenylate synthetase 1, 40/46kDa [Source:HGNC Symbol;Acc:8086]		ENSG00000089127	ILMN_1658247
278	4.36398	I	2	OAS1	2'-5'-oligoadenylate synthetase 1, 40/46kDa [Source:HGNC Symbol;Acc:8086]		ENSG00000089127	ILMN_1658247
279	6.34844	I	48	OAS1	2'-5'-oligoadenylate synthetase 1, 40/46kDa [Source:HGNC Symbol;Acc:8086]		ENSG00000089127	ILMN_1658247
280	4.46253	I	48	OAS1	2'-5'-oligoadenylate synthetase 1, 40/46kDa [Source:HGNC Symbol;Acc:8086]		ENSG00000089127	ILMN_1658247
281	6.14485	I	48	OAS1	2'-5'-oligoadenylate synthetase 1, 40/46kDa [Source:HGNC Symbol;Acc:8086]		ENSG00000089127	ILMN_1658247
347	9.3478	I	6	OAS1	2'-5'-oligoadenylate synthetase 1, 40/46kDa [Source:HGNC Symbol;Acc:8086]		ENSG00000089127	ILMN_1658247
348	3.9368	I	4	OAS1	2'-5'-oligoadenylate synthetase 1, 40/46kDa [Source:HGNC Symbol;Acc:8086]		ENSG00000089127	ILMN_1658247
352	11.174	I	12	OAS1	2'-5'-oligoadenylate synthetase 1, 40/46kDa [Source:HGNC Symbol;Acc:8086]		ENSG00000089127	ILMN_1658247
353	4.8936	I	24	OAS1	2'-5'-oligoadenylate synthetase 1, 40/46kDa [Source:HGNC Symbol;Acc:8086]		ENSG00000089127	ILMN_1658247
354	3.10431	I	48	OAS1	2'-5'-oligoadenylate synthetase 1, 40/46kDa [Source:HGNC Symbol;Acc:8086]		ENSG00000089127	ILMN_1658247
356	2.9308	I	24	OAS1	2'-5'-oligoadenylate synthetase 1, 40/46kDa [Source:HGNC Symbol;Acc:8086]		ENSG00000089127	ILMN_1658247
358	3.34334	I	12	OAS1	2'-5'-oligoadenylate synthetase 1, 40/46kDa [Source:HGNC Symbol;Acc:8086]		ENSG00000089127	ILMN_1658247
362	4.25397	I	6	OAS1	2'-5'-oligoadenylate synthetase 1, 40/46kDa [Source:HGNC Symbol;Acc:8086]		ENSG00000089127	ILMN_1658247
366	2.94014	I	96	OAS1	2'-5'-oligoadenylate synthetase 1, 40/46kDa [Source:HGNC Symbol;Acc:8086]		ENSG00000089127	ILMN_1658247
373	16.1489	I	24	OAS1	2'-5'-oligoadenylate synthetase 1, 40/46kDa [Source:HGNC Symbol;Acc:8086]		ENSG00000089127	ILMN_1658247
374	11.7177	I	6	OAS1	2'-5'-oligoadenylate synthetase 1, 40/46kDa [Source:HGNC Symbol;Acc:8086]		ENSG00000089127	ILMN_1658247
375	10.3463	I	6	OAS1	2'-5'-oligoadenylate synthetase 1, 40/46kDa [Source:HGNC Symbol;Acc:8086]		ENSG00000089127	ILMN_1658247
376	10.2303	I	24	OAS1	2'-5'-oligoadenylate synthetase 1, 40/46kDa [Source:HGNC Symbol;Acc:8086]		ENSG00000089127	ILMN_1658247
87	2.49309	II	12	OAS1	2'-5'-oligoadenylate synthetase 1, 40/46kDa [Source:HGNC Symbol;Acc:8086]		ENSG00000089127	7958884
119	4.55755	I	120	OAS1	2'-5'-oligoadenylate synthetase 1, 40/46kDa [Source:HGNC Symbol;Acc:8086]		ENSG00000089127	7958884
120	4.08216	I	120	OAS1	2'-5'-oligoadenylate synthetase 1, 40/46kDa [Source:HGNC Symbol;Acc:8086]		ENSG00000089127	7958884
121	4.62054	I	120	OAS1	2'-5'-oligoadenylate synthetase 1, 40/46kDa [Source:HGNC Symbol;Acc:8086]		ENSG00000089127	7958884
142	6.07023	I	6	OAS1	2'-5'-oligoadenylate synthetase 1, 40/46kDa [Source:HGNC Symbol;Acc:8086]		ENSG00000089127	7958884
143	12.0293	I	6	OAS1	2'-5'-oligoadenylate synthetase 1, 40/46kDa [Source:HGNC Symbol;Acc:8086]		ENSG00000089127	7958884
201	10.8466	I	2	OAS1	2'-5'-oligoadenylate synthetase 1, 40/46kDa [Source:HGNC Symbol;Acc:8086]		ENSG00000089127	7958884
202	4.20708	I	6	OAS1	2'-5'-oligoadenylate synthetase 1, 40/46kDa [Source:HGNC Symbol;Acc:8086]		ENSG00000089127	7958884
203	4.82303	I	18	OAS1	2'-5'-oligoadenylate synthetase 1, 40/46kDa [Source:HGNC Symbol;Acc:8086]		ENSG00000089127	7958884
307	4.9701	II	48	OAS1	2'-5'-oligoadenylate synthetase 1, 40/46kDa [Source:HGNC Symbol;Acc:8086]		ENSG00000089127	7958884
308	15.9761	II	48	OAS1	2'-5'-oligoadenylate synthetase 1, 40/46kDa [Source:HGNC Symbol;Acc:8086]		ENSG00000089127	7958884
125	17.3185	I	3	OAS2	2'-5'-oligoadenylate synthetase 2, 69/71kDa [Source:HGNC Symbol;Acc:8087]		ENSG00000111335	A_23_P204087
146	2.92879	II	4	OAS2	2'-5'-oligoadenylate synthetase 2, 69/71kDa [Source:HGNC Symbol;Acc:8087]		ENSG00000111335	A_23_P204087
147	10.5994	I	4	OAS2	2'-5'-oligoadenylate synthetase 2, 69/71kDa [Source:HGNC Symbol;Acc:8087]		ENSG00000111335	A_23_P204087
149	10.2433	I	24	OAS2	2'-5'-oligoadenylate synthetase 2, 69/71kDa [Source:HGNC Symbol;Acc:8087]		ENSG00000111335	A_23_P204087
192	8.19982	I	6	OAS2	2'-5'-oligoadenylate synthetase 2, 69/71kDa [Source:HGNC Symbol;Acc:8087]		ENSG00000111335	A_23_P204087
193	26.1524	I	12	OAS2	2'-5'-oligoadenylate synthetase 2, 69/71kDa [Source:HGNC Symbol;Acc:8087]		ENSG00000111335	A_23_P204087
226	12.6194	I	6	OAS2	2'-5'-oligoadenylate synthetase 2, 69/71kDa [Source:HGNC Symbol;Acc:8087]		ENSG00000111335	A_23_P204087
227	18.7473	I	12	OAS2	2'-5'-oligoadenylate synthetase 2, 69/71kDa [Source:HGNC Symbol;Acc:8087]		ENSG00000111335	A_23_P204087
228	8.80887	I	18	OAS2	2'-5'-oligoadenylate synthetase 2, 69/71kDa [Source:HGNC Symbol;Acc:8087]		ENSG00000111335	A_23_P204087
293	50.9036	II	24	OAS2	2'-5'-oligoadenylate synthetase 2, 69/71kDa [Source:HGNC Symbol;Acc:8087]		ENSG00000111335	A_23_P204087
294	16.0569	I	72	OAS2	2'-5'-oligoadenylate synthetase 2, 69/71kDa [Source:HGNC Symbol;Acc:8087]		ENSG00000111335	A_23_P204087
319	6.81029	II	18	OAS2	2'-5'-oligoadenylate synthetase 2, 69/71kDa [Source:HGNC Symbol;Acc:8087]		ENSG00000111335	A_23_P204087
146	3.38796	II	4	OAS2	2'-5'-oligoadenylate synthetase 2, 69/71kDa [Source:HGNC Symbol;Acc:8087]		ENSG00000111335	A_24_P343929
147	12.234	I	4	OAS2	2'-5'-oligoadenylate synthetase 2, 69/71kDa [Source:HGNC Symbol;Acc:8087]		ENSG00000111335	A_24_P343929
149	4.09599	I	24	OAS2	2'-5'-oligoadenylate synthetase 2, 69/71kDa [Source:HGNC Symbol;Acc:8087]		ENSG00000111335	A_24_P343929
319	10.3027	II	18	OAS2	2'-5'-oligoadenylate synthetase 2, 69/71kDa [Source:HGNC Symbol;Acc:8087]		ENSG00000111335	A_24_P343929
12	10.5153	II	24	OAS2	2'-5'-oligoadenylate synthetase 2, 69/71kDa [Source:HGNC Symbol;Acc:8087]		ENSG00000111335	204972_at
13	2.17469	II	6	OAS2	2'-5'-oligoadenylate synthetase 2, 69/71kDa [Source:HGNC Symbol;Acc:8087]		ENSG00000111335	204972_at
14	25.8284	I	24	OAS2	2'-5'-oligoadenylate synthetase 2, 69/71kDa [Source:HGNC Symbol;Acc:8087]		ENSG00000111335	204972_at
15	13.3235	I	6	OAS2	2'-5'-oligoadenylate synthetase 2, 69/71kDa [Source:HGNC Symbol;Acc:8087]		ENSG00000111335	204972_at
20	9.08393	I	72	OAS2	2'-5'-oligoadenylate synthetase 2, 69/71kDa [Source:HGNC Symbol;Acc:8087]		ENSG00000111335	204972_at
21	67.1272	I	18	OAS2	2'-5'-oligoadenylate synthetase 2, 69/71kDa [Source:HGNC Symbol;Acc:8087]		ENSG00000111335	204972_at
22	43.9516	I	12	OAS2	2'-5'-oligoadenylate synthetase 2, 69/71kDa [Source:HGNC Symbol;Acc:8087]		ENSG00000111335	204972_at
23	37.3062	I	8	OAS2	2'-5'-oligoadenylate synthetase 2, 69/71kDa [Source:HGNC Symbol;Acc:8087]		ENSG00000111335	204972_at
24	27.2346	I	6	OAS2	2'-5'-oligoadenylate synthetase 2, 69/71kDa [Source:HGNC Symbol;Acc:8087]		ENSG00000111335	204972_at
25	11.8548	I	4	OAS2	2'-5'-oligoadenylate synthetase 2, 69/71kDa [Source:HGNC Symbol;Acc:8087]		ENSG00000111335	204972_at
26	3.79789	I	2	OAS2	2'-5'-oligoadenylate synthetase 2, 69/71kDa [Source:HGNC Symbol;Acc:8087]		ENSG00000111335	204972_at
37	4.66655	II	5	OAS2	2'-5'-oligoadenylate synthetase 2, 69/71kDa [Source:HGNC Symbol;Acc:8087]		ENSG00000111335	204972_at
38	36.2548	I	5	OAS2	2'-5'-oligoadenylate synthetase 2, 69/71kDa [Source:HGNC Symbol;Acc:8087]		ENSG00000111335	204972_at
39	14.0754	II	5	OAS2	2'-5'-oligoadenylate synthetase 2, 69/71kDa [Source:HGNC Symbol;Acc:8087]		ENSG00000111335	204972_at
40	167.304	I	5	OAS2	2'-5'-oligoadenylate synthetase 2, 69/71kDa [Source:HGNC Symbol;Acc:8087]		ENSG00000111335	204972_at
41	167.784	I	5	OAS2	2'-5'-oligoadenylate synthetase 2, 69/71kDa [Source:HGNC Symbol;Acc:8087]		ENSG00000111335	204972_at
43	9.44177	I	12	OAS2	2'-5'-oligoadenylate synthetase 2, 69/71kDa [Source:HGNC Symbol;Acc:8087]		ENSG00000111335	204972_at
44	15.8669	I	6	OAS2	2'-5'-oligoadenylate synthetase 2, 69/71kDa [Source:HGNC Symbol;Acc:8087]		ENSG00000111335	204972_at
47	21.6581	I	5	OAS2	2'-5'-oligoadenylate synthetase 2, 69/71kDa [Source:HGNC Symbol;Acc:8087]		ENSG00000111335	204972_at
48	10.7445	I	5	OAS2	2'-5'-oligoadenylate synthetase 2, 69/71kDa [Source:HGNC Symbol;Acc:8087]		ENSG00000111335	204972_at
60	23.5877	I	24	OAS2	2'-5'-oligoadenylate synthetase 2, 69/71kDa [Source:HGNC Symbol;Acc:8087]		ENSG00000111335	204972_at
61	8.48148	I	72	OAS2	2'-5'-oligoadenylate synthetase 2, 69/71kDa [Source:HGNC Symbol;Acc:8087]		ENSG00000111335	204972_at
63	3.92414	II	6	OAS2	2'-5'-oligoadenylate synthetase 2, 69/71kDa [Source:HGNC Symbol;Acc:8087]		ENSG00000111335	204972_at
64	3.40418	II	24	OAS2	2'-5'-oligoadenylate synthetase 2, 69/71kDa [Source:HGNC Symbol;Acc:8087]		ENSG00000111335	204972_at
177	10.1402	I	48	OAS2	2'-5'-oligoadenylate synthetase 2, 69/71kDa [Source:HGNC Symbol;Acc:8087]		ENSG00000111335	204972_at
178	3.1768	I	48	OAS2	2'-5'-oligoadenylate synthetase 2, 69/71kDa [Source:HGNC Symbol;Acc:8087]		ENSG00000111335	204972_at
179	2.93295	I	48	OAS2	2'-5'-oligoadenylate synthetase 2, 69/71kDa [Source:HGNC Symbol;Acc:8087]		ENSG00000111335	204972_at
183	5.94195	II	24	OAS2	2'-5'-oligoadenylate synthetase 2, 69/71kDa [Source:HGNC Symbol;Acc:8087]		ENSG00000111335	204972_at
184	4.47144	II	24	OAS2	2'-5'-oligoadenylate synthetase 2, 69/71kDa [Source:HGNC Symbol;Acc:8087]		ENSG00000111335	204972_at
185	4.66207	I	16	OAS2	2'-5'-oligoadenylate synthetase 2, 69/71kDa [Source:HGNC Symbol;Acc:8087]		ENSG00000111335	204972_at
186	5.81417	I	48	OAS2	2'-5'-oligoadenylate synthetase 2, 69/71kDa [Source:HGNC Symbol;Acc:8087]		ENSG00000111335	204972_at
187	6.30429	I	96	OAS2	2'-5'-oligoadenylate synthetase 2, 69/71kDa [Source:HGNC Symbol;Acc:8087]		ENSG00000111335	204972_at
188	2.5133	I	144	OAS2	2'-5'-oligoadenylate synthetase 2, 69/71kDa [Source:HGNC Symbol;Acc:8087]		ENSG00000111335	204972_at
295	4.93386	II	24	OAS2	2'-5'-oligoadenylate synthetase 2, 69/71kDa [Source:HGNC Symbol;Acc:8087]		ENSG00000111335	204972_at
298	28.8512	II	24	OAS2	2'-5'-oligoadenylate synthetase 2, 69/71kDa [Source:HGNC Symbol;Acc:8087]		ENSG00000111335	204972_at
300	3.88289	I	6	OAS2	2'-5'-oligoadenylate synthetase 2, 69/71kDa [Source:HGNC Symbol;Acc:8087]		ENSG00000111335	204972_at
305	3.59438	II	1.5	OAS2	2'-5'-oligoadenylate synthetase 2, 69/71kDa [Source:HGNC Symbol;Acc:8087]		ENSG00000111335	204972_at
306	5.92729	I	1.5	OAS2	2'-5'-oligoadenylate synthetase 2, 69/71kDa [Source:HGNC Symbol;Acc:8087]		ENSG00000111335	204972_at
311	3.03451	II	24	OAS2	2'-5'-oligoadenylate synthetase 2, 69/71kDa [Source:HGNC Symbol;Acc:8087]		ENSG00000111335	204972_at
313	4.2046	II	72	OAS2	2'-5'-oligoadenylate synthetase 2, 69/71kDa [Source:HGNC Symbol;Acc:8087]		ENSG00000111335	204972_at
44	4.21773	I	6	OAS2	2'-5'-oligoadenylate synthetase 2, 69/71kDa [Source:HGNC Symbol;Acc:8087]		ENSG00000111335	228607_at
47	11.6098	I	5	OAS2	2'-5'-oligoadenylate synthetase 2, 69/71kDa [Source:HGNC Symbol;Acc:8087]		ENSG00000111335	228607_at
48	6.76842	I	5	OAS2	2'-5'-oligoadenylate synthetase 2, 69/71kDa [Source:HGNC Symbol;Acc:8087]		ENSG00000111335	228607_at
60	3.59465	I	24	OAS2	2'-5'-oligoadenylate synthetase 2, 69/71kDa [Source:HGNC Symbol;Acc:8087]		ENSG00000111335	228607_at
183	2.98008	II	24	OAS2	2'-5'-oligoadenylate synthetase 2, 69/71kDa [Source:HGNC Symbol;Acc:8087]		ENSG00000111335	228607_at
184	2.14719	II	24	OAS2	2'-5'-oligoadenylate synthetase 2, 69/71kDa [Source:HGNC Symbol;Acc:8087]		ENSG00000111335	228607_at
185	4.0169	I	16	OAS2	2'-5'-oligoadenylate synthetase 2, 69/71kDa [Source:HGNC Symbol;Acc:8087]		ENSG00000111335	228607_at
186	3.55954	I	48	OAS2	2'-5'-oligoadenylate synthetase 2, 69/71kDa [Source:HGNC Symbol;Acc:8087]		ENSG00000111335	228607_at
187	5.06027	I	96	OAS2	2'-5'-oligoadenylate synthetase 2, 69/71kDa [Source:HGNC Symbol;Acc:8087]		ENSG00000111335	228607_at
188	2.18481	I	144	OAS2	2'-5'-oligoadenylate synthetase 2, 69/71kDa [Source:HGNC Symbol;Acc:8087]		ENSG00000111335	228607_at
300	8.14232	I	6	OAS2	2'-5'-oligoadenylate synthetase 2, 69/71kDa [Source:HGNC Symbol;Acc:8087]		ENSG00000111335	228607_at
305	4.97899	II	1.5	OAS2	2'-5'-oligoadenylate synthetase 2, 69/71kDa [Source:HGNC Symbol;Acc:8087]		ENSG00000111335	228607_at
306	8.63911	I	1.5	OAS2	2'-5'-oligoadenylate synthetase 2, 69/71kDa [Source:HGNC Symbol;Acc:8087]		ENSG00000111335	228607_at
311	4.45264	II	24	OAS2	2'-5'-oligoadenylate synthetase 2, 69/71kDa [Source:HGNC Symbol;Acc:8087]		ENSG00000111335	228607_at
313	4.04661	II	72	OAS2	2'-5'-oligoadenylate synthetase 2, 69/71kDa [Source:HGNC Symbol;Acc:8087]		ENSG00000111335	228607_at
32	8.40251	I	3	OAS2	2'-5'-oligoadenylate synthetase 2, 69/71kDa [Source:HGNC Symbol;Acc:8087]		ENSG00000111335	39263_at
58	6.42079	I	3	OAS2	2'-5'-oligoadenylate synthetase 2, 69/71kDa [Source:HGNC Symbol;Acc:8087]		ENSG00000111335	39263_at
32	12.1081	I	3	OAS2	2'-5'-oligoadenylate synthetase 2, 69/71kDa [Source:HGNC Symbol;Acc:8087]		ENSG00000111335	39264_at
58	9.11593	I	3	OAS2	2'-5'-oligoadenylate synthetase 2, 69/71kDa [Source:HGNC Symbol;Acc:8087]		ENSG00000111335	39264_at
75	6.70575	I	16	OAS2	2'-5'-oligoadenylate synthetase 2, 69/71kDa [Source:HGNC Symbol;Acc:8087]		ENSG00000111335	ILMN_1674063
78	61.0578	I	12	OAS2	2'-5'-oligoadenylate synthetase 2, 69/71kDa [Source:HGNC Symbol;Acc:8087]		ENSG00000111335	ILMN_1674063
79	88.4066	I	24	OAS2	2'-5'-oligoadenylate synthetase 2, 69/71kDa [Source:HGNC Symbol;Acc:8087]		ENSG00000111335	ILMN_1674063
80	61.2832	I	48	OAS2	2'-5'-oligoadenylate synthetase 2, 69/71kDa [Source:HGNC Symbol;Acc:8087]		ENSG00000111335	ILMN_1674063
81	3.01281	I	4	OAS2	2'-5'-oligoadenylate synthetase 2, 69/71kDa [Source:HGNC Symbol;Acc:8087]		ENSG00000111335	ILMN_1674063
82	3.0999	II	12	OAS2	2'-5'-oligoadenylate synthetase 2, 69/71kDa [Source:HGNC Symbol;Acc:8087]		ENSG00000111335	ILMN_1674063
83	12.5775	II	24	OAS2	2'-5'-oligoadenylate synthetase 2, 69/71kDa [Source:HGNC Symbol;Acc:8087]		ENSG00000111335	ILMN_1674063
85	6.014	II	48	OAS2	2'-5'-oligoadenylate synthetase 2, 69/71kDa [Source:HGNC Symbol;Acc:8087]		ENSG00000111335	ILMN_1674063
123	2.19933	II	168	OAS2	2'-5'-oligoadenylate synthetase 2, 69/71kDa [Source:HGNC Symbol;Acc:8087]		ENSG00000111335	ILMN_1674063
124	2.34196	II	168	OAS2	2'-5'-oligoadenylate synthetase 2, 69/71kDa [Source:HGNC Symbol;Acc:8087]		ENSG00000111335	ILMN_1674063
128	32.1279	II	10	OAS2	2'-5'-oligoadenylate synthetase 2, 69/71kDa [Source:HGNC Symbol;Acc:8087]		ENSG00000111335	ILMN_1674063
129	71.3206	I	10	OAS2	2'-5'-oligoadenylate synthetase 2, 69/71kDa [Source:HGNC Symbol;Acc:8087]		ENSG00000111335	ILMN_1674063
130	62.9617	I	10	OAS2	2'-5'-oligoadenylate synthetase 2, 69/71kDa [Source:HGNC Symbol;Acc:8087]		ENSG00000111335	ILMN_1674063
131	88.3942	II	10	OAS2	2'-5'-oligoadenylate synthetase 2, 69/71kDa [Source:HGNC Symbol;Acc:8087]		ENSG00000111335	ILMN_1674063
160	9.35668	I	18	OAS2	2'-5'-oligoadenylate synthetase 2, 69/71kDa [Source:HGNC Symbol;Acc:8087]		ENSG00000111335	ILMN_1674063
161	8.6561	I	6	OAS2	2'-5'-oligoadenylate synthetase 2, 69/71kDa [Source:HGNC Symbol;Acc:8087]		ENSG00000111335	ILMN_1674063
162	4.08942	II	6	OAS2	2'-5'-oligoadenylate synthetase 2, 69/71kDa [Source:HGNC Symbol;Acc:8087]		ENSG00000111335	ILMN_1674063
200	27.6731	I	10	OAS2	2'-5'-oligoadenylate synthetase 2, 69/71kDa [Source:HGNC Symbol;Acc:8087]		ENSG00000111335	ILMN_1674063
275	181.211	I	8	OAS2	2'-5'-oligoadenylate synthetase 2, 69/71kDa [Source:HGNC Symbol;Acc:8087]		ENSG00000111335	ILMN_1674063
276	51.716	I	2	OAS2	2'-5'-oligoadenylate synthetase 2, 69/71kDa [Source:HGNC Symbol;Acc:8087]		ENSG00000111335	ILMN_1674063
277	138.526	I	8	OAS2	2'-5'-oligoadenylate synthetase 2, 69/71kDa [Source:HGNC Symbol;Acc:8087]		ENSG00000111335	ILMN_1674063
278	43.254	I	2	OAS2	2'-5'-oligoadenylate synthetase 2, 69/71kDa [Source:HGNC Symbol;Acc:8087]		ENSG00000111335	ILMN_1674063
279	62.065	I	48	OAS2	2'-5'-oligoadenylate synthetase 2, 69/71kDa [Source:HGNC Symbol;Acc:8087]		ENSG00000111335	ILMN_1674063
280	25.7472	I	48	OAS2	2'-5'-oligoadenylate synthetase 2, 69/71kDa [Source:HGNC Symbol;Acc:8087]		ENSG00000111335	ILMN_1674063
281	67.8272	I	48	OAS2	2'-5'-oligoadenylate synthetase 2, 69/71kDa [Source:HGNC Symbol;Acc:8087]		ENSG00000111335	ILMN_1674063
324	2.05105	II	72	OAS2	2'-5'-oligoadenylate synthetase 2, 69/71kDa [Source:HGNC Symbol;Acc:8087]		ENSG00000111335	ILMN_1674063
354	6.75954	I	48	OAS2	2'-5'-oligoadenylate synthetase 2, 69/71kDa [Source:HGNC Symbol;Acc:8087]		ENSG00000111335	ILMN_1674063
356	4.84046	I	24	OAS2	2'-5'-oligoadenylate synthetase 2, 69/71kDa [Source:HGNC Symbol;Acc:8087]		ENSG00000111335	ILMN_1674063
358	5.01175	I	12	OAS2	2'-5'-oligoadenylate synthetase 2, 69/71kDa [Source:HGNC Symbol;Acc:8087]		ENSG00000111335	ILMN_1674063
360	6.16254	I	3	OAS2	2'-5'-oligoadenylate synthetase 2, 69/71kDa [Source:HGNC Symbol;Acc:8087]		ENSG00000111335	ILMN_1674063
362	6.83822	I	6	OAS2	2'-5'-oligoadenylate synthetase 2, 69/71kDa [Source:HGNC Symbol;Acc:8087]		ENSG00000111335	ILMN_1674063
366	6.47139	I	96	OAS2	2'-5'-oligoadenylate synthetase 2, 69/71kDa [Source:HGNC Symbol;Acc:8087]		ENSG00000111335	ILMN_1674063
373	48.4193	I	24	OAS2	2'-5'-oligoadenylate synthetase 2, 69/71kDa [Source:HGNC Symbol;Acc:8087]		ENSG00000111335	ILMN_1674063
374	25.4461	I	6	OAS2	2'-5'-oligoadenylate synthetase 2, 69/71kDa [Source:HGNC Symbol;Acc:8087]		ENSG00000111335	ILMN_1674063
375	25.1561	I	6	OAS2	2'-5'-oligoadenylate synthetase 2, 69/71kDa [Source:HGNC Symbol;Acc:8087]		ENSG00000111335	ILMN_1674063
376	23.2702	I	24	OAS2	2'-5'-oligoadenylate synthetase 2, 69/71kDa [Source:HGNC Symbol;Acc:8087]		ENSG00000111335	ILMN_1674063
75	9.00682	I	16	OAS2	2'-5'-oligoadenylate synthetase 2, 69/71kDa [Source:HGNC Symbol;Acc:8087]		ENSG00000111335	ILMN_1736729
78	4.83662	I	12	OAS2	2'-5'-oligoadenylate synthetase 2, 69/71kDa [Source:HGNC Symbol;Acc:8087]		ENSG00000111335	ILMN_1736729
79	5.53559	I	24	OAS2	2'-5'-oligoadenylate synthetase 2, 69/71kDa [Source:HGNC Symbol;Acc:8087]		ENSG00000111335	ILMN_1736729
80	3.55395	I	48	OAS2	2'-5'-oligoadenylate synthetase 2, 69/71kDa [Source:HGNC Symbol;Acc:8087]		ENSG00000111335	ILMN_1736729
128	14.0142	II	10	OAS2	2'-5'-oligoadenylate synthetase 2, 69/71kDa [Source:HGNC Symbol;Acc:8087]		ENSG00000111335	ILMN_1736729
129	35.9208	I	10	OAS2	2'-5'-oligoadenylate synthetase 2, 69/71kDa [Source:HGNC Symbol;Acc:8087]		ENSG00000111335	ILMN_1736729
130	27.8547	I	10	OAS2	2'-5'-oligoadenylate synthetase 2, 69/71kDa [Source:HGNC Symbol;Acc:8087]		ENSG00000111335	ILMN_1736729
131	15.5302	II	10	OAS2	2'-5'-oligoadenylate synthetase 2, 69/71kDa [Source:HGNC Symbol;Acc:8087]		ENSG00000111335	ILMN_1736729
160	9.47099	I	18	OAS2	2'-5'-oligoadenylate synthetase 2, 69/71kDa [Source:HGNC Symbol;Acc:8087]		ENSG00000111335	ILMN_1736729
200	2.35265	I	10	OAS2	2'-5'-oligoadenylate synthetase 2, 69/71kDa [Source:HGNC Symbol;Acc:8087]		ENSG00000111335	ILMN_1736729
275	62.1483	I	8	OAS2	2'-5'-oligoadenylate synthetase 2, 69/71kDa [Source:HGNC Symbol;Acc:8087]		ENSG00000111335	ILMN_1736729
277	19.4932	I	8	OAS2	2'-5'-oligoadenylate synthetase 2, 69/71kDa [Source:HGNC Symbol;Acc:8087]		ENSG00000111335	ILMN_1736729
278	4.8845	I	2	OAS2	2'-5'-oligoadenylate synthetase 2, 69/71kDa [Source:HGNC Symbol;Acc:8087]		ENSG00000111335	ILMN_1736729
279	3.88132	I	48	OAS2	2'-5'-oligoadenylate synthetase 2, 69/71kDa [Source:HGNC Symbol;Acc:8087]		ENSG00000111335	ILMN_1736729
280	2.18084	I	48	OAS2	2'-5'-oligoadenylate synthetase 2, 69/71kDa [Source:HGNC Symbol;Acc:8087]		ENSG00000111335	ILMN_1736729
281	4.20839	I	48	OAS2	2'-5'-oligoadenylate synthetase 2, 69/71kDa [Source:HGNC Symbol;Acc:8087]		ENSG00000111335	ILMN_1736729
354	3.48007	I	48	OAS2	2'-5'-oligoadenylate synthetase 2, 69/71kDa [Source:HGNC Symbol;Acc:8087]		ENSG00000111335	ILMN_1736729
356	4.19682	I	24	OAS2	2'-5'-oligoadenylate synthetase 2, 69/71kDa [Source:HGNC Symbol;Acc:8087]		ENSG00000111335	ILMN_1736729
358	3.93755	I	12	OAS2	2'-5'-oligoadenylate synthetase 2, 69/71kDa [Source:HGNC Symbol;Acc:8087]		ENSG00000111335	ILMN_1736729
362	5.0824	I	6	OAS2	2'-5'-oligoadenylate synthetase 2, 69/71kDa [Source:HGNC Symbol;Acc:8087]		ENSG00000111335	ILMN_1736729
366	4.32321	I	96	OAS2	2'-5'-oligoadenylate synthetase 2, 69/71kDa [Source:HGNC Symbol;Acc:8087]		ENSG00000111335	ILMN_1736729
373	4.93496	I	24	OAS2	2'-5'-oligoadenylate synthetase 2, 69/71kDa [Source:HGNC Symbol;Acc:8087]		ENSG00000111335	ILMN_1736729
374	2.5856	I	6	OAS2	2'-5'-oligoadenylate synthetase 2, 69/71kDa [Source:HGNC Symbol;Acc:8087]		ENSG00000111335	ILMN_1736729
375	2.68019	I	6	OAS2	2'-5'-oligoadenylate synthetase 2, 69/71kDa [Source:HGNC Symbol;Acc:8087]		ENSG00000111335	ILMN_1736729
376	3.48849	I	24	OAS2	2'-5'-oligoadenylate synthetase 2, 69/71kDa [Source:HGNC Symbol;Acc:8087]		ENSG00000111335	ILMN_1736729
75	8.53302	I	16	OAS2	2'-5'-oligoadenylate synthetase 2, 69/71kDa [Source:HGNC Symbol;Acc:8087]		ENSG00000111335	ILMN_2248970
78	12.5163	I	12	OAS2	2'-5'-oligoadenylate synthetase 2, 69/71kDa [Source:HGNC Symbol;Acc:8087]		ENSG00000111335	ILMN_2248970
79	10.8415	I	24	OAS2	2'-5'-oligoadenylate synthetase 2, 69/71kDa [Source:HGNC Symbol;Acc:8087]		ENSG00000111335	ILMN_2248970
80	8.52926	I	48	OAS2	2'-5'-oligoadenylate synthetase 2, 69/71kDa [Source:HGNC Symbol;Acc:8087]		ENSG00000111335	ILMN_2248970
81	3.18703	I	4	OAS2	2'-5'-oligoadenylate synthetase 2, 69/71kDa [Source:HGNC Symbol;Acc:8087]		ENSG00000111335	ILMN_2248970
82	2.37619	II	12	OAS2	2'-5'-oligoadenylate synthetase 2, 69/71kDa [Source:HGNC Symbol;Acc:8087]		ENSG00000111335	ILMN_2248970
83	4.06555	II	24	OAS2	2'-5'-oligoadenylate synthetase 2, 69/71kDa [Source:HGNC Symbol;Acc:8087]		ENSG00000111335	ILMN_2248970
128	3.6701	II	10	OAS2	2'-5'-oligoadenylate synthetase 2, 69/71kDa [Source:HGNC Symbol;Acc:8087]		ENSG00000111335	ILMN_2248970
129	6.41445	I	10	OAS2	2'-5'-oligoadenylate synthetase 2, 69/71kDa [Source:HGNC Symbol;Acc:8087]		ENSG00000111335	ILMN_2248970
130	5.73286	I	10	OAS2	2'-5'-oligoadenylate synthetase 2, 69/71kDa [Source:HGNC Symbol;Acc:8087]		ENSG00000111335	ILMN_2248970
131	5.27046	II	10	OAS2	2'-5'-oligoadenylate synthetase 2, 69/71kDa [Source:HGNC Symbol;Acc:8087]		ENSG00000111335	ILMN_2248970
160	7.99096	I	18	OAS2	2'-5'-oligoadenylate synthetase 2, 69/71kDa [Source:HGNC Symbol;Acc:8087]		ENSG00000111335	ILMN_2248970
277	12.3655	I	8	OAS2	2'-5'-oligoadenylate synthetase 2, 69/71kDa [Source:HGNC Symbol;Acc:8087]		ENSG00000111335	ILMN_2248970
278	4.44479	I	2	OAS2	2'-5'-oligoadenylate synthetase 2, 69/71kDa [Source:HGNC Symbol;Acc:8087]		ENSG00000111335	ILMN_2248970
279	15.5937	I	48	OAS2	2'-5'-oligoadenylate synthetase 2, 69/71kDa [Source:HGNC Symbol;Acc:8087]		ENSG00000111335	ILMN_2248970
280	9.60213	I	48	OAS2	2'-5'-oligoadenylate synthetase 2, 69/71kDa [Source:HGNC Symbol;Acc:8087]		ENSG00000111335	ILMN_2248970
281	15.7648	I	48	OAS2	2'-5'-oligoadenylate synthetase 2, 69/71kDa [Source:HGNC Symbol;Acc:8087]		ENSG00000111335	ILMN_2248970
354	3.90145	I	48	OAS2	2'-5'-oligoadenylate synthetase 2, 69/71kDa [Source:HGNC Symbol;Acc:8087]		ENSG00000111335	ILMN_2248970
356	3.49025	I	24	OAS2	2'-5'-oligoadenylate synthetase 2, 69/71kDa [Source:HGNC Symbol;Acc:8087]		ENSG00000111335	ILMN_2248970
358	3.57941	I	12	OAS2	2'-5'-oligoadenylate synthetase 2, 69/71kDa [Source:HGNC Symbol;Acc:8087]		ENSG00000111335	ILMN_2248970
360	6.15054	I	3	OAS2	2'-5'-oligoadenylate synthetase 2, 69/71kDa [Source:HGNC Symbol;Acc:8087]		ENSG00000111335	ILMN_2248970
362	4.39459	I	6	OAS2	2'-5'-oligoadenylate synthetase 2, 69/71kDa [Source:HGNC Symbol;Acc:8087]		ENSG00000111335	ILMN_2248970
364	2.84769	I	1	OAS2	2'-5'-oligoadenylate synthetase 2, 69/71kDa [Source:HGNC Symbol;Acc:8087]		ENSG00000111335	ILMN_2248970
366	4.09587	I	96	OAS2	2'-5'-oligoadenylate synthetase 2, 69/71kDa [Source:HGNC Symbol;Acc:8087]		ENSG00000111335	ILMN_2248970
373	3.90485	I	24	OAS2	2'-5'-oligoadenylate synthetase 2, 69/71kDa [Source:HGNC Symbol;Acc:8087]		ENSG00000111335	ILMN_2248970
374	4.05502	I	6	OAS2	2'-5'-oligoadenylate synthetase 2, 69/71kDa [Source:HGNC Symbol;Acc:8087]		ENSG00000111335	ILMN_2248970
375	4.20577	I	6	OAS2	2'-5'-oligoadenylate synthetase 2, 69/71kDa [Source:HGNC Symbol;Acc:8087]		ENSG00000111335	ILMN_2248970
376	2.78922	I	24	OAS2	2'-5'-oligoadenylate synthetase 2, 69/71kDa [Source:HGNC Symbol;Acc:8087]		ENSG00000111335	ILMN_2248970
161	2.20978	I	6	OAS2	2'-5'-oligoadenylate synthetase 2, 69/71kDa [Source:HGNC Symbol;Acc:8087]		ENSG00000111335	ILMN_1812740
163	5.53583	I	3	OAS2	2'-5'-oligoadenylate synthetase 2, 69/71kDa [Source:HGNC Symbol;Acc:8087]		ENSG00000111335	ILMN_1812740
161	4.97606	I	6	OAS2	2'-5'-oligoadenylate synthetase 2, 69/71kDa [Source:HGNC Symbol;Acc:8087]		ENSG00000111335	ILMN_1810213
162	2.76876	II	6	OAS2	2'-5'-oligoadenylate synthetase 2, 69/71kDa [Source:HGNC Symbol;Acc:8087]		ENSG00000111335	ILMN_1810213
163	8.73707	I	3	OAS2	2'-5'-oligoadenylate synthetase 2, 69/71kDa [Source:HGNC Symbol;Acc:8087]		ENSG00000111335	ILMN_1810213
12	11.563	II	24	OAS2	2'-5'-oligoadenylate synthetase 2, 69/71kDa [Source:HGNC Symbol;Acc:8087]		ENSG00000111335	206553_at
14	15.8405	I	24	OAS2	2'-5'-oligoadenylate synthetase 2, 69/71kDa [Source:HGNC Symbol;Acc:8087]		ENSG00000111335	206553_at
15	3.68646	I	6	OAS2	2'-5'-oligoadenylate synthetase 2, 69/71kDa [Source:HGNC Symbol;Acc:8087]		ENSG00000111335	206553_at
20	2.55613	I	72	OAS2	2'-5'-oligoadenylate synthetase 2, 69/71kDa [Source:HGNC Symbol;Acc:8087]		ENSG00000111335	206553_at
21	17.4405	I	18	OAS2	2'-5'-oligoadenylate synthetase 2, 69/71kDa [Source:HGNC Symbol;Acc:8087]		ENSG00000111335	206553_at
22	10.7786	I	12	OAS2	2'-5'-oligoadenylate synthetase 2, 69/71kDa [Source:HGNC Symbol;Acc:8087]		ENSG00000111335	206553_at
24	5.19362	I	6	OAS2	2'-5'-oligoadenylate synthetase 2, 69/71kDa [Source:HGNC Symbol;Acc:8087]		ENSG00000111335	206553_at
38	3.84154	I	5	OAS2	2'-5'-oligoadenylate synthetase 2, 69/71kDa [Source:HGNC Symbol;Acc:8087]		ENSG00000111335	206553_at
39	2.63223	II	5	OAS2	2'-5'-oligoadenylate synthetase 2, 69/71kDa [Source:HGNC Symbol;Acc:8087]		ENSG00000111335	206553_at
40	13.8087	I	5	OAS2	2'-5'-oligoadenylate synthetase 2, 69/71kDa [Source:HGNC Symbol;Acc:8087]		ENSG00000111335	206553_at
41	13.8688	I	5	OAS2	2'-5'-oligoadenylate synthetase 2, 69/71kDa [Source:HGNC Symbol;Acc:8087]		ENSG00000111335	206553_at
43	2.02001	I	12	OAS2	2'-5'-oligoadenylate synthetase 2, 69/71kDa [Source:HGNC Symbol;Acc:8087]		ENSG00000111335	206553_at
44	3.22248	I	6	OAS2	2'-5'-oligoadenylate synthetase 2, 69/71kDa [Source:HGNC Symbol;Acc:8087]		ENSG00000111335	206553_at
60	7.70566	I	24	OAS2	2'-5'-oligoadenylate synthetase 2, 69/71kDa [Source:HGNC Symbol;Acc:8087]		ENSG00000111335	206553_at
61	3.17561	I	72	OAS2	2'-5'-oligoadenylate synthetase 2, 69/71kDa [Source:HGNC Symbol;Acc:8087]		ENSG00000111335	206553_at
63	2.67844	II	6	OAS2	2'-5'-oligoadenylate synthetase 2, 69/71kDa [Source:HGNC Symbol;Acc:8087]		ENSG00000111335	206553_at
67	2.39928	I	6	OAS2	2'-5'-oligoadenylate synthetase 2, 69/71kDa [Source:HGNC Symbol;Acc:8087]		ENSG00000111335	206553_at
144	7.07239	II	24	OAS2	2'-5'-oligoadenylate synthetase 2, 69/71kDa [Source:HGNC Symbol;Acc:8087]		ENSG00000111335	206553_at
177	6.80078	I	48	OAS2	2'-5'-oligoadenylate synthetase 2, 69/71kDa [Source:HGNC Symbol;Acc:8087]		ENSG00000111335	206553_at
178	3.37112	I	48	OAS2	2'-5'-oligoadenylate synthetase 2, 69/71kDa [Source:HGNC Symbol;Acc:8087]		ENSG00000111335	206553_at
179	3.0623	I	48	OAS2	2'-5'-oligoadenylate synthetase 2, 69/71kDa [Source:HGNC Symbol;Acc:8087]		ENSG00000111335	206553_at
183	3.30372	II	24	OAS2	2'-5'-oligoadenylate synthetase 2, 69/71kDa [Source:HGNC Symbol;Acc:8087]		ENSG00000111335	206553_at
184	2.92531	II	24	OAS2	2'-5'-oligoadenylate synthetase 2, 69/71kDa [Source:HGNC Symbol;Acc:8087]		ENSG00000111335	206553_at
185	4.15707	I	16	OAS2	2'-5'-oligoadenylate synthetase 2, 69/71kDa [Source:HGNC Symbol;Acc:8087]		ENSG00000111335	206553_at
186	2.35914	I	48	OAS2	2'-5'-oligoadenylate synthetase 2, 69/71kDa [Source:HGNC Symbol;Acc:8087]		ENSG00000111335	206553_at
187	2.86069	I	96	OAS2	2'-5'-oligoadenylate synthetase 2, 69/71kDa [Source:HGNC Symbol;Acc:8087]		ENSG00000111335	206553_at
295	3.75969	II	24	OAS2	2'-5'-oligoadenylate synthetase 2, 69/71kDa [Source:HGNC Symbol;Acc:8087]		ENSG00000111335	206553_at
300	8.13456	I	6	OAS2	2'-5'-oligoadenylate synthetase 2, 69/71kDa [Source:HGNC Symbol;Acc:8087]		ENSG00000111335	206553_at
305	2.90845	II	1.5	OAS2	2'-5'-oligoadenylate synthetase 2, 69/71kDa [Source:HGNC Symbol;Acc:8087]		ENSG00000111335	206553_at
306	4.96727	I	1.5	OAS2	2'-5'-oligoadenylate synthetase 2, 69/71kDa [Source:HGNC Symbol;Acc:8087]		ENSG00000111335	206553_at
311	3.33742	II	24	OAS2	2'-5'-oligoadenylate synthetase 2, 69/71kDa [Source:HGNC Symbol;Acc:8087]		ENSG00000111335	206553_at
313	3.98733	II	72	OAS2	2'-5'-oligoadenylate synthetase 2, 69/71kDa [Source:HGNC Symbol;Acc:8087]		ENSG00000111335	206553_at
75	4.19014	I	16	OAS2	2'-5'-oligoadenylate synthetase 2, 69/71kDa [Source:HGNC Symbol;Acc:8087]		ENSG00000111335	ILMN_1709333
78	2.53806	I	12	OAS2	2'-5'-oligoadenylate synthetase 2, 69/71kDa [Source:HGNC Symbol;Acc:8087]		ENSG00000111335	ILMN_1709333
79	2.60326	I	24	OAS2	2'-5'-oligoadenylate synthetase 2, 69/71kDa [Source:HGNC Symbol;Acc:8087]		ENSG00000111335	ILMN_1709333
128	6.05421	II	10	OAS2	2'-5'-oligoadenylate synthetase 2, 69/71kDa [Source:HGNC Symbol;Acc:8087]		ENSG00000111335	ILMN_1709333
129	17.5991	I	10	OAS2	2'-5'-oligoadenylate synthetase 2, 69/71kDa [Source:HGNC Symbol;Acc:8087]		ENSG00000111335	ILMN_1709333
130	16.4959	I	10	OAS2	2'-5'-oligoadenylate synthetase 2, 69/71kDa [Source:HGNC Symbol;Acc:8087]		ENSG00000111335	ILMN_1709333
131	7.58698	II	10	OAS2	2'-5'-oligoadenylate synthetase 2, 69/71kDa [Source:HGNC Symbol;Acc:8087]		ENSG00000111335	ILMN_1709333
160	7.61602	I	18	OAS2	2'-5'-oligoadenylate synthetase 2, 69/71kDa [Source:HGNC Symbol;Acc:8087]		ENSG00000111335	ILMN_1709333
275	11.0409	I	8	OAS2	2'-5'-oligoadenylate synthetase 2, 69/71kDa [Source:HGNC Symbol;Acc:8087]		ENSG00000111335	ILMN_1709333
277	11.6004	I	8	OAS2	2'-5'-oligoadenylate synthetase 2, 69/71kDa [Source:HGNC Symbol;Acc:8087]		ENSG00000111335	ILMN_1709333
279	2.36289	I	48	OAS2	2'-5'-oligoadenylate synthetase 2, 69/71kDa [Source:HGNC Symbol;Acc:8087]		ENSG00000111335	ILMN_1709333
281	2.79025	I	48	OAS2	2'-5'-oligoadenylate synthetase 2, 69/71kDa [Source:HGNC Symbol;Acc:8087]		ENSG00000111335	ILMN_1709333
354	2.27836	I	48	OAS2	2'-5'-oligoadenylate synthetase 2, 69/71kDa [Source:HGNC Symbol;Acc:8087]		ENSG00000111335	ILMN_1709333
356	2.39496	I	24	OAS2	2'-5'-oligoadenylate synthetase 2, 69/71kDa [Source:HGNC Symbol;Acc:8087]		ENSG00000111335	ILMN_1709333
358	2.29527	I	12	OAS2	2'-5'-oligoadenylate synthetase 2, 69/71kDa [Source:HGNC Symbol;Acc:8087]		ENSG00000111335	ILMN_1709333
362	3.23735	I	6	OAS2	2'-5'-oligoadenylate synthetase 2, 69/71kDa [Source:HGNC Symbol;Acc:8087]		ENSG00000111335	ILMN_1709333
366	2.11712	I	96	OAS2	2'-5'-oligoadenylate synthetase 2, 69/71kDa [Source:HGNC Symbol;Acc:8087]		ENSG00000111335	ILMN_1709333
373	3.16453	I	24	OAS2	2'-5'-oligoadenylate synthetase 2, 69/71kDa [Source:HGNC Symbol;Acc:8087]		ENSG00000111335	ILMN_1709333
374	2.26676	I	6	OAS2	2'-5'-oligoadenylate synthetase 2, 69/71kDa [Source:HGNC Symbol;Acc:8087]		ENSG00000111335	ILMN_1709333
375	2.38857	I	6	OAS2	2'-5'-oligoadenylate synthetase 2, 69/71kDa [Source:HGNC Symbol;Acc:8087]		ENSG00000111335	ILMN_1709333
87	7.55551	II	12	OAS2	2'-5'-oligoadenylate synthetase 2, 69/71kDa [Source:HGNC Symbol;Acc:8087]		ENSG00000111335	7958913
88	3.86885	II	24	OAS2	2'-5'-oligoadenylate synthetase 2, 69/71kDa [Source:HGNC Symbol;Acc:8087]		ENSG00000111335	7958913
119	3.41804	I	120	OAS2	2'-5'-oligoadenylate synthetase 2, 69/71kDa [Source:HGNC Symbol;Acc:8087]		ENSG00000111335	7958913
120	4.07874	I	120	OAS2	2'-5'-oligoadenylate synthetase 2, 69/71kDa [Source:HGNC Symbol;Acc:8087]		ENSG00000111335	7958913
121	3.01159	I	120	OAS2	2'-5'-oligoadenylate synthetase 2, 69/71kDa [Source:HGNC Symbol;Acc:8087]		ENSG00000111335	7958913
122	2.94684	I	120	OAS2	2'-5'-oligoadenylate synthetase 2, 69/71kDa [Source:HGNC Symbol;Acc:8087]		ENSG00000111335	7958913
142	9.11637	I	6	OAS2	2'-5'-oligoadenylate synthetase 2, 69/71kDa [Source:HGNC Symbol;Acc:8087]		ENSG00000111335	7958913
143	14.8532	I	6	OAS2	2'-5'-oligoadenylate synthetase 2, 69/71kDa [Source:HGNC Symbol;Acc:8087]		ENSG00000111335	7958913
201	6.68927	I	2	OAS2	2'-5'-oligoadenylate synthetase 2, 69/71kDa [Source:HGNC Symbol;Acc:8087]		ENSG00000111335	7958913
202	3.37364	I	6	OAS2	2'-5'-oligoadenylate synthetase 2, 69/71kDa [Source:HGNC Symbol;Acc:8087]		ENSG00000111335	7958913
203	3.57947	I	18	OAS2	2'-5'-oligoadenylate synthetase 2, 69/71kDa [Source:HGNC Symbol;Acc:8087]		ENSG00000111335	7958913
307	8.54832	II	48	OAS2	2'-5'-oligoadenylate synthetase 2, 69/71kDa [Source:HGNC Symbol;Acc:8087]		ENSG00000111335	7958913
308	35.9559	II	48	OAS2	2'-5'-oligoadenylate synthetase 2, 69/71kDa [Source:HGNC Symbol;Acc:8087]		ENSG00000111335	7958913
318	4.27735	II	6	OPTN	optineurin [Source:HGNC Symbol;Acc:17142]		ENSG00000123240	A_23_P1461
319	2.68029	II	18	OPTN	optineurin [Source:HGNC Symbol;Acc:17142]		ENSG00000123240	A_23_P1461
40	2.03419	I	5	OPTN	optineurin [Source:HGNC Symbol;Acc:17142]		ENSG00000123240	202073_at
44	2.03039	I	6	OPTN	optineurin [Source:HGNC Symbol;Acc:17142]		ENSG00000123240	202073_at
63	3.11031	II	6	OPTN	optineurin [Source:HGNC Symbol;Acc:17142]		ENSG00000123240	202073_at
64	2.48843	II	24	OPTN	optineurin [Source:HGNC Symbol;Acc:17142]		ENSG00000123240	202073_at
67	2.13478	I	6	OPTN	optineurin [Source:HGNC Symbol;Acc:17142]		ENSG00000123240	202073_at
183	2.13155	II	24	OPTN	optineurin [Source:HGNC Symbol;Acc:17142]		ENSG00000123240	202073_at
295	2.64708	II	24	OPTN	optineurin [Source:HGNC Symbol;Acc:17142]		ENSG00000123240	202073_at
305	5.72825	II	1.5	OPTN	optineurin [Source:HGNC Symbol;Acc:17142]		ENSG00000123240	202073_at
306	14.2003	I	1.5	OPTN	optineurin [Source:HGNC Symbol;Acc:17142]		ENSG00000123240	202073_at
311	10.9892	II	24	OPTN	optineurin [Source:HGNC Symbol;Acc:17142]		ENSG00000123240	202073_at
12	2.28023	II	24	OPTN	optineurin [Source:HGNC Symbol;Acc:17142]		ENSG00000123240	202074_s_at
60	2.52282	I	24	OPTN	optineurin [Source:HGNC Symbol;Acc:17142]		ENSG00000123240	202074_s_at
63	2.11049	II	6	OPTN	optineurin [Source:HGNC Symbol;Acc:17142]		ENSG00000123240	202074_s_at
144	3.34737	II	24	OPTN	optineurin [Source:HGNC Symbol;Acc:17142]		ENSG00000123240	202074_s_at
183	2.67829	II	24	OPTN	optineurin [Source:HGNC Symbol;Acc:17142]		ENSG00000123240	202074_s_at
184	2.20252	II	24	OPTN	optineurin [Source:HGNC Symbol;Acc:17142]		ENSG00000123240	202074_s_at
295	2.60939	II	24	OPTN	optineurin [Source:HGNC Symbol;Acc:17142]		ENSG00000123240	202074_s_at
305	5.32069	II	1.5	OPTN	optineurin [Source:HGNC Symbol;Acc:17142]		ENSG00000123240	202074_s_at
306	12.4095	I	1.5	OPTN	optineurin [Source:HGNC Symbol;Acc:17142]		ENSG00000123240	202074_s_at
311	10.4588	II	24	OPTN	optineurin [Source:HGNC Symbol;Acc:17142]		ENSG00000123240	202074_s_at
313	2.26549	II	72	OPTN	optineurin [Source:HGNC Symbol;Acc:17142]		ENSG00000123240	202074_s_at
58	5.07735	I	3	OPTN	optineurin [Source:HGNC Symbol;Acc:17142]		ENSG00000123240	41743_i_at
58	6.47275	I	3	OPTN	optineurin [Source:HGNC Symbol;Acc:17142]		ENSG00000123240	41742_s_at
74	2.28524	I	16	OPTN	optineurin [Source:HGNC Symbol;Acc:17142]		ENSG00000123240	ILMN_2381899
83	2.09509	II	24	OPTN	optineurin [Source:HGNC Symbol;Acc:17142]		ENSG00000123240	ILMN_2381899
85	2.84915	II	48	OPTN	optineurin [Source:HGNC Symbol;Acc:17142]		ENSG00000123240	ILMN_2381899
128	2.64799	II	10	OPTN	optineurin [Source:HGNC Symbol;Acc:17142]		ENSG00000123240	ILMN_2381899
129	2.87233	I	10	OPTN	optineurin [Source:HGNC Symbol;Acc:17142]		ENSG00000123240	ILMN_2381899
130	2.26252	I	10	OPTN	optineurin [Source:HGNC Symbol;Acc:17142]		ENSG00000123240	ILMN_2381899
131	2.53039	II	10	OPTN	optineurin [Source:HGNC Symbol;Acc:17142]		ENSG00000123240	ILMN_2381899
249	2.62751	I	12	OPTN	optineurin [Source:HGNC Symbol;Acc:17142]		ENSG00000123240	ILMN_2381899
254	2.109	I	6	OPTN	optineurin [Source:HGNC Symbol;Acc:17142]		ENSG00000123240	ILMN_2381899
277	2.25237	I	8	OPTN	optineurin [Source:HGNC Symbol;Acc:17142]		ENSG00000123240	ILMN_2381899
320	2.53431	II	24	OPTN	optineurin [Source:HGNC Symbol;Acc:17142]		ENSG00000123240	ILMN_2381899
87	3.23217	II	12	OPTN	optineurin [Source:HGNC Symbol;Acc:17142]		ENSG00000123240	7926239
88	3.04822	II	24	OPTN	optineurin [Source:HGNC Symbol;Acc:17142]		ENSG00000123240	7926239
308	2.25204	II	48	OPTN	optineurin [Source:HGNC Symbol;Acc:17142]		ENSG00000123240	7926239
314	2.55856	II	24	PRKCB	protein kinase C, beta [Source:HGNC Symbol;Acc:9395]		ENSG00000166501	207957_s_at
314	2.00151	II	24	PRKCB	protein kinase C, beta [Source:HGNC Symbol;Acc:9395]		ENSG00000166501	228795_at
314	2.63385	II	24	PRKCB	protein kinase C, beta [Source:HGNC Symbol;Acc:9395]		ENSG00000166501	227817_at
314	2.11418	II	24	PRKCB	protein kinase C, beta [Source:HGNC Symbol;Acc:9395]		ENSG00000166501	209685_s_at
144	2.49449	II	24	RIOK3	RIO kinase 3 [Source:HGNC Symbol;Acc:11451]		ENSG00000101782	202129_s_at
298	2.06747	II	24	RIOK3	RIO kinase 3 [Source:HGNC Symbol;Acc:11451]		ENSG00000101782	202129_s_at
85	2.46345	II	48	RIOK3	RIO kinase 3 [Source:HGNC Symbol;Acc:11451]		ENSG00000101782	ILMN_1724700
90	2.76284	II	72	RIOK3	RIO kinase 3 [Source:HGNC Symbol;Acc:11451]		ENSG00000101782	8020508
61	2.06483	I	72	RNASE6	ribonuclease, RNase A family, k6 [Source:HGNC Symbol;Acc:10048]	BAG36350	ENSG00000169413	213566_at
188	2.21572	I	144	RNASE6	ribonuclease, RNase A family, k6 [Source:HGNC Symbol;Acc:10048]	BAG36350	ENSG00000169413	213566_at
314	3.22202	II	24	RNASE6	ribonuclease, RNase A family, k6 [Source:HGNC Symbol;Acc:10048]	BAG36350	ENSG00000169413	213566_at
174	2.28692	II	20	RNASET2	ribonuclease T2 [Source:HGNC Symbol;Acc:21686]		ENSG00000026297	A_24_P360269
312	2.22847	II	144	RNASET2	ribonuclease T2 [Source:HGNC Symbol;Acc:21686]		ENSG00000026297	217983_s_at
313	2.32855	II	72	RNASET2	ribonuclease T2 [Source:HGNC Symbol;Acc:21686]		ENSG00000026297	217983_s_at
314	2.0266	II	24	RNASET2	ribonuclease T2 [Source:HGNC Symbol;Acc:21686]		ENSG00000026297	217983_s_at
313	2.36743	II	72	RNASET2	ribonuclease T2 [Source:HGNC Symbol;Acc:21686]		ENSG00000026297	239388_at
23	2.40204	I	8	S100A12	S100 calcium binding protein A12 [Source:HGNC Symbol;Acc:10489]	BAA12036	ENSG00000163221	205863_at
185	3.27743	I	16	S100A12	S100 calcium binding protein A12 [Source:HGNC Symbol;Acc:10489]	BAA12036	ENSG00000163221	205863_at
295	2.04061	II	24	S100A12	S100 calcium binding protein A12 [Source:HGNC Symbol;Acc:10489]	BAA12036	ENSG00000163221	205863_at
185	5.29935	I	16	S100A8	S100 calcium binding protein A8 [Source:HGNC Symbol;Acc:10498]	CAA29580	ENSG00000143546	202917_s_at
313	4.03076	II	72	S100A8	S100 calcium binding protein A8 [Source:HGNC Symbol;Acc:10498]	CAA29580	ENSG00000143546	202917_s_at
313	4.3151	II	72	S100A8	S100 calcium binding protein A8 [Source:HGNC Symbol;Acc:10498]	CAA29580	ENSG00000143546	214370_at
22	2.13866	I	12	SEC14L1	SEC14-like 1 (S. cerevisiae) [Source:HGNC Symbol;Acc:10698]	CAX33889	ENSG00000129657	202082_s_at
126	2.68493	II	24	SEMA4A	sema domain, immunoglobulin domain (Ig), transmembrane domain (TM) and short cytoplasmic domain, (semaphorin) 4A [Source:HGNC Symbol;Acc:10729]	BAG59287	ENSG00000196189	A_23_P23438
193	3.20391	I	12	SEMA4A	sema domain, immunoglobulin domain (Ig), transmembrane domain (TM) and short cytoplasmic domain, (semaphorin) 4A [Source:HGNC Symbol;Acc:10729]	BAG59287	ENSG00000196189	A_23_P23438
194	2.72475	I	18	SEMA4A	sema domain, immunoglobulin domain (Ig), transmembrane domain (TM) and short cytoplasmic domain, (semaphorin) 4A [Source:HGNC Symbol;Acc:10729]	BAG59287	ENSG00000196189	A_23_P23438
311	2.93405	II	24	SEMA4A	sema domain, immunoglobulin domain (Ig), transmembrane domain (TM) and short cytoplasmic domain, (semaphorin) 4A [Source:HGNC Symbol;Acc:10729]	BAG59287	ENSG00000196189	219259_at
312	2.2051	II	144	SEMA4A	sema domain, immunoglobulin domain (Ig), transmembrane domain (TM) and short cytoplasmic domain, (semaphorin) 4A [Source:HGNC Symbol;Acc:10729]	BAG59287	ENSG00000196189	219259_at
313	3.19124	II	72	SEMA4A	sema domain, immunoglobulin domain (Ig), transmembrane domain (TM) and short cytoplasmic domain, (semaphorin) 4A [Source:HGNC Symbol;Acc:10729]	BAG59287	ENSG00000196189	219259_at
313	2.11076	II	72	SEMA4A	sema domain, immunoglobulin domain (Ig), transmembrane domain (TM) and short cytoplasmic domain, (semaphorin) 4A [Source:HGNC Symbol;Acc:10729]	BAG59287	ENSG00000196189	234072_at
160	2.27777	I	18	SEMA4A	sema domain, immunoglobulin domain (Ig), transmembrane domain (TM) and short cytoplasmic domain, (semaphorin) 4A [Source:HGNC Symbol;Acc:10729]	BAG59287	ENSG00000196189	ILMN_1702787
125	5.2284	I	3	SERPING1	serpin peptidase inhibitor, clade G (C1 inhibitor), member 1 [Source:HGNC Symbol;Acc:1228]	BAG64762	ENSG00000149131	A_23_P139123
126	17.9038	II	24	SERPING1	serpin peptidase inhibitor, clade G (C1 inhibitor), member 1 [Source:HGNC Symbol;Acc:1228]	BAG64762	ENSG00000149131	A_23_P139123
127	5.87037	II	24	SERPING1	serpin peptidase inhibitor, clade G (C1 inhibitor), member 1 [Source:HGNC Symbol;Acc:1228]	BAG64762	ENSG00000149131	A_23_P139123
146	3.66243	II	4	SERPING1	serpin peptidase inhibitor, clade G (C1 inhibitor), member 1 [Source:HGNC Symbol;Acc:1228]	BAG64762	ENSG00000149131	A_23_P139123
147	2.67566	I	4	SERPING1	serpin peptidase inhibitor, clade G (C1 inhibitor), member 1 [Source:HGNC Symbol;Acc:1228]	BAG64762	ENSG00000149131	A_23_P139123
173	16.8088	II	20	SERPING1	serpin peptidase inhibitor, clade G (C1 inhibitor), member 1 [Source:HGNC Symbol;Acc:1228]	BAG64762	ENSG00000149131	A_23_P139123
174	27.5705	II	20	SERPING1	serpin peptidase inhibitor, clade G (C1 inhibitor), member 1 [Source:HGNC Symbol;Acc:1228]	BAG64762	ENSG00000149131	A_23_P139123
226	4.21239	I	6	SERPING1	serpin peptidase inhibitor, clade G (C1 inhibitor), member 1 [Source:HGNC Symbol;Acc:1228]	BAG64762	ENSG00000149131	A_23_P139123
227	4.18066	I	12	SERPING1	serpin peptidase inhibitor, clade G (C1 inhibitor), member 1 [Source:HGNC Symbol;Acc:1228]	BAG64762	ENSG00000149131	A_23_P139123
228	3.51035	I	18	SERPING1	serpin peptidase inhibitor, clade G (C1 inhibitor), member 1 [Source:HGNC Symbol;Acc:1228]	BAG64762	ENSG00000149131	A_23_P139123
293	18.4215	II	24	SERPING1	serpin peptidase inhibitor, clade G (C1 inhibitor), member 1 [Source:HGNC Symbol;Acc:1228]	BAG64762	ENSG00000149131	A_23_P139123
319	21.6149	II	18	SERPING1	serpin peptidase inhibitor, clade G (C1 inhibitor), member 1 [Source:HGNC Symbol;Acc:1228]	BAG64762	ENSG00000149131	A_23_P139123
12	9.97627	II	24	SERPING1	serpin peptidase inhibitor, clade G (C1 inhibitor), member 1 [Source:HGNC Symbol;Acc:1228]	BAG64762	ENSG00000149131	200986_at
13	6.68876	II	6	SERPING1	serpin peptidase inhibitor, clade G (C1 inhibitor), member 1 [Source:HGNC Symbol;Acc:1228]	BAG64762	ENSG00000149131	200986_at
60	15.4682	I	24	SERPING1	serpin peptidase inhibitor, clade G (C1 inhibitor), member 1 [Source:HGNC Symbol;Acc:1228]	BAG64762	ENSG00000149131	200986_at
61	15.4881	I	72	SERPING1	serpin peptidase inhibitor, clade G (C1 inhibitor), member 1 [Source:HGNC Symbol;Acc:1228]	BAG64762	ENSG00000149131	200986_at
63	6.94634	II	6	SERPING1	serpin peptidase inhibitor, clade G (C1 inhibitor), member 1 [Source:HGNC Symbol;Acc:1228]	BAG64762	ENSG00000149131	200986_at
64	11.1246	II	24	SERPING1	serpin peptidase inhibitor, clade G (C1 inhibitor), member 1 [Source:HGNC Symbol;Acc:1228]	BAG64762	ENSG00000149131	200986_at
68	16.7172	II	96	SERPING1	serpin peptidase inhibitor, clade G (C1 inhibitor), member 1 [Source:HGNC Symbol;Acc:1228]	BAG64762	ENSG00000149131	200986_at
144	113.131	II	24	SERPING1	serpin peptidase inhibitor, clade G (C1 inhibitor), member 1 [Source:HGNC Symbol;Acc:1228]	BAG64762	ENSG00000149131	200986_at
150	2.13929	I	24	SERPING1	serpin peptidase inhibitor, clade G (C1 inhibitor), member 1 [Source:HGNC Symbol;Acc:1228]	BAG64762	ENSG00000149131	200986_at
183	24.9516	II	24	SERPING1	serpin peptidase inhibitor, clade G (C1 inhibitor), member 1 [Source:HGNC Symbol;Acc:1228]	BAG64762	ENSG00000149131	200986_at
184	11.0919	II	24	SERPING1	serpin peptidase inhibitor, clade G (C1 inhibitor), member 1 [Source:HGNC Symbol;Acc:1228]	BAG64762	ENSG00000149131	200986_at
295	27.8314	II	24	SERPING1	serpin peptidase inhibitor, clade G (C1 inhibitor), member 1 [Source:HGNC Symbol;Acc:1228]	BAG64762	ENSG00000149131	200986_at
298	38.5471	II	24	SERPING1	serpin peptidase inhibitor, clade G (C1 inhibitor), member 1 [Source:HGNC Symbol;Acc:1228]	BAG64762	ENSG00000149131	200986_at
300	3.89198	I	6	SERPING1	serpin peptidase inhibitor, clade G (C1 inhibitor), member 1 [Source:HGNC Symbol;Acc:1228]	BAG64762	ENSG00000149131	200986_at
305	9.80864	II	1.5	SERPING1	serpin peptidase inhibitor, clade G (C1 inhibitor), member 1 [Source:HGNC Symbol;Acc:1228]	BAG64762	ENSG00000149131	200986_at
306	7.77135	I	1.5	SERPING1	serpin peptidase inhibitor, clade G (C1 inhibitor), member 1 [Source:HGNC Symbol;Acc:1228]	BAG64762	ENSG00000149131	200986_at
311	66.9856	II	24	SERPING1	serpin peptidase inhibitor, clade G (C1 inhibitor), member 1 [Source:HGNC Symbol;Acc:1228]	BAG64762	ENSG00000149131	200986_at
312	63.6924	II	144	SERPING1	serpin peptidase inhibitor, clade G (C1 inhibitor), member 1 [Source:HGNC Symbol;Acc:1228]	BAG64762	ENSG00000149131	200986_at
313	100.338	II	72	SERPING1	serpin peptidase inhibitor, clade G (C1 inhibitor), member 1 [Source:HGNC Symbol;Acc:1228]	BAG64762	ENSG00000149131	200986_at
74	19.7102	I	16	SERPING1	serpin peptidase inhibitor, clade G (C1 inhibitor), member 1 [Source:HGNC Symbol;Acc:1228]	BAG64762	ENSG00000149131	ILMN_1670305
78	2.14734	I	12	SERPING1	serpin peptidase inhibitor, clade G (C1 inhibitor), member 1 [Source:HGNC Symbol;Acc:1228]	BAG64762	ENSG00000149131	ILMN_1670305
79	2.1404	I	24	SERPING1	serpin peptidase inhibitor, clade G (C1 inhibitor), member 1 [Source:HGNC Symbol;Acc:1228]	BAG64762	ENSG00000149131	ILMN_1670305
82	4.25752	II	12	SERPING1	serpin peptidase inhibitor, clade G (C1 inhibitor), member 1 [Source:HGNC Symbol;Acc:1228]	BAG64762	ENSG00000149131	ILMN_1670305
83	11.7896	II	24	SERPING1	serpin peptidase inhibitor, clade G (C1 inhibitor), member 1 [Source:HGNC Symbol;Acc:1228]	BAG64762	ENSG00000149131	ILMN_1670305
85	10.4618	II	48	SERPING1	serpin peptidase inhibitor, clade G (C1 inhibitor), member 1 [Source:HGNC Symbol;Acc:1228]	BAG64762	ENSG00000149131	ILMN_1670305
128	4.73757	II	10	SERPING1	serpin peptidase inhibitor, clade G (C1 inhibitor), member 1 [Source:HGNC Symbol;Acc:1228]	BAG64762	ENSG00000149131	ILMN_1670305
131	5.88789	II	10	SERPING1	serpin peptidase inhibitor, clade G (C1 inhibitor), member 1 [Source:HGNC Symbol;Acc:1228]	BAG64762	ENSG00000149131	ILMN_1670305
160	9.8538	I	18	SERPING1	serpin peptidase inhibitor, clade G (C1 inhibitor), member 1 [Source:HGNC Symbol;Acc:1228]	BAG64762	ENSG00000149131	ILMN_1670305
249	4.21563	I	12	SERPING1	serpin peptidase inhibitor, clade G (C1 inhibitor), member 1 [Source:HGNC Symbol;Acc:1228]	BAG64762	ENSG00000149131	ILMN_1670305
251	4.4056	I	24	SERPING1	serpin peptidase inhibitor, clade G (C1 inhibitor), member 1 [Source:HGNC Symbol;Acc:1228]	BAG64762	ENSG00000149131	ILMN_1670305
253	2.55245	I	4	SERPING1	serpin peptidase inhibitor, clade G (C1 inhibitor), member 1 [Source:HGNC Symbol;Acc:1228]	BAG64762	ENSG00000149131	ILMN_1670305
254	3.08853	I	6	SERPING1	serpin peptidase inhibitor, clade G (C1 inhibitor), member 1 [Source:HGNC Symbol;Acc:1228]	BAG64762	ENSG00000149131	ILMN_1670305
275	2.75557	I	8	SERPING1	serpin peptidase inhibitor, clade G (C1 inhibitor), member 1 [Source:HGNC Symbol;Acc:1228]	BAG64762	ENSG00000149131	ILMN_1670305
276	2.06403	I	2	SERPING1	serpin peptidase inhibitor, clade G (C1 inhibitor), member 1 [Source:HGNC Symbol;Acc:1228]	BAG64762	ENSG00000149131	ILMN_1670305
320	9.88035	II	24	SERPING1	serpin peptidase inhibitor, clade G (C1 inhibitor), member 1 [Source:HGNC Symbol;Acc:1228]	BAG64762	ENSG00000149131	ILMN_1670305
321	8.36069	II	12	SERPING1	serpin peptidase inhibitor, clade G (C1 inhibitor), member 1 [Source:HGNC Symbol;Acc:1228]	BAG64762	ENSG00000149131	ILMN_1670305
322	4.62328	II	6	SERPING1	serpin peptidase inhibitor, clade G (C1 inhibitor), member 1 [Source:HGNC Symbol;Acc:1228]	BAG64762	ENSG00000149131	ILMN_1670305
324	5.64811	II	72	SERPING1	serpin peptidase inhibitor, clade G (C1 inhibitor), member 1 [Source:HGNC Symbol;Acc:1228]	BAG64762	ENSG00000149131	ILMN_1670305
347	2.00382	I	6	SERPING1	serpin peptidase inhibitor, clade G (C1 inhibitor), member 1 [Source:HGNC Symbol;Acc:1228]	BAG64762	ENSG00000149131	ILMN_1670305
352	2.24245	I	12	SERPING1	serpin peptidase inhibitor, clade G (C1 inhibitor), member 1 [Source:HGNC Symbol;Acc:1228]	BAG64762	ENSG00000149131	ILMN_1670305
87	5.35877	II	12	SERPING1	serpin peptidase inhibitor, clade G (C1 inhibitor), member 1 [Source:HGNC Symbol;Acc:1228]	BAG64762	ENSG00000149131	7940028
88	5.904	II	24	SERPING1	serpin peptidase inhibitor, clade G (C1 inhibitor), member 1 [Source:HGNC Symbol;Acc:1228]	BAG64762	ENSG00000149131	7940028
89	2.60164	II	48	SERPING1	serpin peptidase inhibitor, clade G (C1 inhibitor), member 1 [Source:HGNC Symbol;Acc:1228]	BAG64762	ENSG00000149131	7940028
143	2.38803	I	6	SERPING1	serpin peptidase inhibitor, clade G (C1 inhibitor), member 1 [Source:HGNC Symbol;Acc:1228]	BAG64762	ENSG00000149131	7940028
201	2.36338	I	2	SERPING1	serpin peptidase inhibitor, clade G (C1 inhibitor), member 1 [Source:HGNC Symbol;Acc:1228]	BAG64762	ENSG00000149131	7940028
202	6.18239	I	6	SERPING1	serpin peptidase inhibitor, clade G (C1 inhibitor), member 1 [Source:HGNC Symbol;Acc:1228]	BAG64762	ENSG00000149131	7940028
203	5.69981	I	18	SERPING1	serpin peptidase inhibitor, clade G (C1 inhibitor), member 1 [Source:HGNC Symbol;Acc:1228]	BAG64762	ENSG00000149131	7940028
307	17.5881	II	48	SERPING1	serpin peptidase inhibitor, clade G (C1 inhibitor), member 1 [Source:HGNC Symbol;Acc:1228]	BAG64762	ENSG00000149131	7940028
308	7.11236	II	48	SERPING1	serpin peptidase inhibitor, clade G (C1 inhibitor), member 1 [Source:HGNC Symbol;Acc:1228]	BAG64762	ENSG00000149131	7940028
305	3.08041	II	1.5	SLFN11	schlafen family member 11 [Source:HGNC Symbol;Acc:26633]		ENSG00000172716	226743_at
306	2.49567	I	1.5	SLFN11	schlafen family member 11 [Source:HGNC Symbol;Acc:26633]		ENSG00000172716	226743_at
276	2.22672	I	2	SLFN11	schlafen family member 11 [Source:HGNC Symbol;Acc:26633]		ENSG00000172716	ILMN_1752520
278	2.35743	I	2	SLFN11	schlafen family member 11 [Source:HGNC Symbol;Acc:26633]		ENSG00000172716	ILMN_1752520
87	2.05007	II	12	SLFN11	schlafen family member 11 [Source:HGNC Symbol;Acc:26633]		ENSG00000172716	8014233
126	14.0022	II	24	SLPI	secretory leukocyte peptidase inhibitor [Source:HGNC Symbol;Acc:11092]	AAA60559	ENSG00000124107	A_24_P190472
311	2.33659	II	24	SPON2	spondin 2, extracellular matrix protein [Source:HGNC Symbol;Acc:11253]		ENSG00000159674	218638_s_at
314	9.07784	II	24	SPON2	spondin 2, extracellular matrix protein [Source:HGNC Symbol;Acc:11253]		ENSG00000159674	218638_s_at
147	2.2852	I	4	THEMIS2	thymocyte selection associated family member 2 [Source:HGNC Symbol;Acc:16839]		ENSG00000130775	A_24_P85775
226	2.14606	I	6	THEMIS2	thymocyte selection associated family member 2 [Source:HGNC Symbol;Acc:16839]		ENSG00000130775	A_24_P85775
293	14.3606	II	24	THEMIS2	thymocyte selection associated family member 2 [Source:HGNC Symbol;Acc:16839]		ENSG00000130775	A_24_P85775
15	5.36359	I	6	THEMIS2	thymocyte selection associated family member 2 [Source:HGNC Symbol;Acc:16839]		ENSG00000130775	207571_x_at
21	4.05851	I	18	THEMIS2	thymocyte selection associated family member 2 [Source:HGNC Symbol;Acc:16839]		ENSG00000130775	207571_x_at
22	5.6309	I	12	THEMIS2	thymocyte selection associated family member 2 [Source:HGNC Symbol;Acc:16839]		ENSG00000130775	207571_x_at
23	8.90487	I	8	THEMIS2	thymocyte selection associated family member 2 [Source:HGNC Symbol;Acc:16839]		ENSG00000130775	207571_x_at
24	5.47258	I	6	THEMIS2	thymocyte selection associated family member 2 [Source:HGNC Symbol;Acc:16839]		ENSG00000130775	207571_x_at
37	2.55879	II	5	THEMIS2	thymocyte selection associated family member 2 [Source:HGNC Symbol;Acc:16839]		ENSG00000130775	207571_x_at
38	12.5438	I	5	THEMIS2	thymocyte selection associated family member 2 [Source:HGNC Symbol;Acc:16839]		ENSG00000130775	207571_x_at
40	19.2925	I	5	THEMIS2	thymocyte selection associated family member 2 [Source:HGNC Symbol;Acc:16839]		ENSG00000130775	207571_x_at
41	14.8366	I	5	THEMIS2	thymocyte selection associated family member 2 [Source:HGNC Symbol;Acc:16839]		ENSG00000130775	207571_x_at
44	2.23807	I	6	THEMIS2	thymocyte selection associated family member 2 [Source:HGNC Symbol;Acc:16839]		ENSG00000130775	207571_x_at
46	2.08691	I	6	THEMIS2	thymocyte selection associated family member 2 [Source:HGNC Symbol;Acc:16839]		ENSG00000130775	207571_x_at
144	2.74412	II	24	THEMIS2	thymocyte selection associated family member 2 [Source:HGNC Symbol;Acc:16839]		ENSG00000130775	207571_x_at
298	3.38225	II	24	THEMIS2	thymocyte selection associated family member 2 [Source:HGNC Symbol;Acc:16839]		ENSG00000130775	207571_x_at
15	2.78834	I	6	THEMIS2	thymocyte selection associated family member 2 [Source:HGNC Symbol;Acc:16839]		ENSG00000130775	210785_s_at
21	5.48301	I	18	THEMIS2	thymocyte selection associated family member 2 [Source:HGNC Symbol;Acc:16839]		ENSG00000130775	210785_s_at
22	5.22813	I	12	THEMIS2	thymocyte selection associated family member 2 [Source:HGNC Symbol;Acc:16839]		ENSG00000130775	210785_s_at
23	10.1065	I	8	THEMIS2	thymocyte selection associated family member 2 [Source:HGNC Symbol;Acc:16839]		ENSG00000130775	210785_s_at
24	7.92224	I	6	THEMIS2	thymocyte selection associated family member 2 [Source:HGNC Symbol;Acc:16839]		ENSG00000130775	210785_s_at
25	5.35079	I	4	THEMIS2	thymocyte selection associated family member 2 [Source:HGNC Symbol;Acc:16839]		ENSG00000130775	210785_s_at
38	26.4991	I	5	THEMIS2	thymocyte selection associated family member 2 [Source:HGNC Symbol;Acc:16839]		ENSG00000130775	210785_s_at
40	25.7332	I	5	THEMIS2	thymocyte selection associated family member 2 [Source:HGNC Symbol;Acc:16839]		ENSG00000130775	210785_s_at
41	20.5759	I	5	THEMIS2	thymocyte selection associated family member 2 [Source:HGNC Symbol;Acc:16839]		ENSG00000130775	210785_s_at
44	3.06494	I	6	THEMIS2	thymocyte selection associated family member 2 [Source:HGNC Symbol;Acc:16839]		ENSG00000130775	210785_s_at
298	3.51095	II	24	THEMIS2	thymocyte selection associated family member 2 [Source:HGNC Symbol;Acc:16839]		ENSG00000130775	210785_s_at
277	2.60362	I	8	THEMIS2	thymocyte selection associated family member 2 [Source:HGNC Symbol;Acc:16839]		ENSG00000130775	ILMN_1735143
143	4.86119	I	6	THEMIS2	thymocyte selection associated family member 2 [Source:HGNC Symbol;Acc:16839]		ENSG00000130775	7899394
308	3.50547	II	48	THEMIS2	thymocyte selection associated family member 2 [Source:HGNC Symbol;Acc:16839]		ENSG00000130775	7899394
293	3.65244	II	24	TLR1	toll-like receptor 1 [Source:HGNC Symbol;Acc:11847]		ENSG00000174125	A_23_P10873
318	2.19267	II	6	TLR1	toll-like receptor 1 [Source:HGNC Symbol;Acc:11847]		ENSG00000174125	A_23_P10873
183	2.23982	II	24	TLR1	toll-like receptor 1 [Source:HGNC Symbol;Acc:11847]		ENSG00000174125	210176_at
184	2.15251	II	24	TLR1	toll-like receptor 1 [Source:HGNC Symbol;Acc:11847]		ENSG00000174125	210176_at
185	2.25169	I	16	TLR1	toll-like receptor 1 [Source:HGNC Symbol;Acc:11847]		ENSG00000174125	210176_at
293	3.71787	II	24	TLR4	toll-like receptor 4 [Source:HGNC Symbol;Acc:11850]	ACX46980	ENSG00000136869	A_24_P69538
317	2.11124	II	18	TLR4	toll-like receptor 4 [Source:HGNC Symbol;Acc:11850]	ACX46980	ENSG00000136869	A_23_P60306
146	2.10315	II	4	TLR4	toll-like receptor 4 [Source:HGNC Symbol;Acc:11850]	ACX46980	ENSG00000136869	A_32_P66881
293	2.27373	II	24	TLR4	toll-like receptor 4 [Source:HGNC Symbol;Acc:11850]	ACX46980	ENSG00000136869	A_32_P66881
314	2.1655	II	24	TLR4	toll-like receptor 4 [Source:HGNC Symbol;Acc:11850]	ACX46980	ENSG00000136869	224341_x_at
314	2.40989	II	24	TLR4	toll-like receptor 4 [Source:HGNC Symbol;Acc:11850]	ACX46980	ENSG00000136869	232068_s_at
314	2.24951	II	24	TLR4	toll-like receptor 4 [Source:HGNC Symbol;Acc:11850]	ACX46980	ENSG00000136869	1552798_a_at
39	2.30935	II	5	TLR4	toll-like receptor 4 [Source:HGNC Symbol;Acc:11850]	ACX46980	ENSG00000136869	221060_s_at
131	2.55098	II	10	TLR4	toll-like receptor 4 [Source:HGNC Symbol;Acc:11850]	ACX46980	ENSG00000136869	ILMN_1706217
160	2.06858	I	18	TLR4	toll-like receptor 4 [Source:HGNC Symbol;Acc:11850]	ACX46980	ENSG00000136869	ILMN_1706217
293	2.00684	II	24	TNFAIP8L2	tumor necrosis factor, alpha-induced protein 8-like 2 [Source:HGNC Symbol;Acc:26277]	AAG44785	ENSG00000163154	A_23_P46356
125	9.9317	I	3	TRIM22	tripartite motif containing 22 [Source:HGNC Symbol;Acc:16379]		ENSG00000132274	A_24_P172481
126	3.23446	II	24	TRIM22	tripartite motif containing 22 [Source:HGNC Symbol;Acc:16379]		ENSG00000132274	A_24_P172481
146	2.39271	II	4	TRIM22	tripartite motif containing 22 [Source:HGNC Symbol;Acc:16379]		ENSG00000132274	A_24_P172481
147	7.50215	I	4	TRIM22	tripartite motif containing 22 [Source:HGNC Symbol;Acc:16379]		ENSG00000132274	A_24_P172481
149	10.0331	I	24	TRIM22	tripartite motif containing 22 [Source:HGNC Symbol;Acc:16379]		ENSG00000132274	A_24_P172481
173	3.35806	II	20	TRIM22	tripartite motif containing 22 [Source:HGNC Symbol;Acc:16379]		ENSG00000132274	A_24_P172481
174	6.08926	II	20	TRIM22	tripartite motif containing 22 [Source:HGNC Symbol;Acc:16379]		ENSG00000132274	A_24_P172481
192	17.9426	I	6	TRIM22	tripartite motif containing 22 [Source:HGNC Symbol;Acc:16379]		ENSG00000132274	A_24_P172481
193	27.2599	I	12	TRIM22	tripartite motif containing 22 [Source:HGNC Symbol;Acc:16379]		ENSG00000132274	A_24_P172481
226	46.9896	I	6	TRIM22	tripartite motif containing 22 [Source:HGNC Symbol;Acc:16379]		ENSG00000132274	A_24_P172481
227	45.1346	I	12	TRIM22	tripartite motif containing 22 [Source:HGNC Symbol;Acc:16379]		ENSG00000132274	A_24_P172481
228	34.9053	I	18	TRIM22	tripartite motif containing 22 [Source:HGNC Symbol;Acc:16379]		ENSG00000132274	A_24_P172481
293	8.54868	II	24	TRIM22	tripartite motif containing 22 [Source:HGNC Symbol;Acc:16379]		ENSG00000132274	A_24_P172481
318	3.74808	II	6	TRIM22	tripartite motif containing 22 [Source:HGNC Symbol;Acc:16379]		ENSG00000132274	A_24_P172481
319	5.12927	II	18	TRIM22	tripartite motif containing 22 [Source:HGNC Symbol;Acc:16379]		ENSG00000132274	A_24_P172481
146	2.62366	II	4	TRIM22	tripartite motif containing 22 [Source:HGNC Symbol;Acc:16379]		ENSG00000132274	A_23_P203498
147	8.27972	I	4	TRIM22	tripartite motif containing 22 [Source:HGNC Symbol;Acc:16379]		ENSG00000132274	A_23_P203498
148	2.05115	I	6	TRIM22	tripartite motif containing 22 [Source:HGNC Symbol;Acc:16379]		ENSG00000132274	A_23_P203498
149	12.5759	I	24	TRIM22	tripartite motif containing 22 [Source:HGNC Symbol;Acc:16379]		ENSG00000132274	A_23_P203498
318	4.09104	II	6	TRIM22	tripartite motif containing 22 [Source:HGNC Symbol;Acc:16379]		ENSG00000132274	A_23_P203498
319	5.70761	II	18	TRIM22	tripartite motif containing 22 [Source:HGNC Symbol;Acc:16379]		ENSG00000132274	A_23_P203498
12	21.0033	II	24	TRIM22	tripartite motif containing 22 [Source:HGNC Symbol;Acc:16379]		ENSG00000132274	213293_s_at
13	8.98178	II	6	TRIM22	tripartite motif containing 22 [Source:HGNC Symbol;Acc:16379]		ENSG00000132274	213293_s_at
14	7.79681	I	24	TRIM22	tripartite motif containing 22 [Source:HGNC Symbol;Acc:16379]		ENSG00000132274	213293_s_at
15	15.7788	I	6	TRIM22	tripartite motif containing 22 [Source:HGNC Symbol;Acc:16379]		ENSG00000132274	213293_s_at
20	2.45531	I	72	TRIM22	tripartite motif containing 22 [Source:HGNC Symbol;Acc:16379]		ENSG00000132274	213293_s_at
21	22.2328	I	18	TRIM22	tripartite motif containing 22 [Source:HGNC Symbol;Acc:16379]		ENSG00000132274	213293_s_at
22	19.6134	I	12	TRIM22	tripartite motif containing 22 [Source:HGNC Symbol;Acc:16379]		ENSG00000132274	213293_s_at
23	18.1886	I	8	TRIM22	tripartite motif containing 22 [Source:HGNC Symbol;Acc:16379]		ENSG00000132274	213293_s_at
24	8.18732	I	6	TRIM22	tripartite motif containing 22 [Source:HGNC Symbol;Acc:16379]		ENSG00000132274	213293_s_at
25	6.64242	I	4	TRIM22	tripartite motif containing 22 [Source:HGNC Symbol;Acc:16379]		ENSG00000132274	213293_s_at
26	2.41621	I	2	TRIM22	tripartite motif containing 22 [Source:HGNC Symbol;Acc:16379]		ENSG00000132274	213293_s_at
39	2.77262	II	5	TRIM22	tripartite motif containing 22 [Source:HGNC Symbol;Acc:16379]		ENSG00000132274	213293_s_at
40	3.57536	I	5	TRIM22	tripartite motif containing 22 [Source:HGNC Symbol;Acc:16379]		ENSG00000132274	213293_s_at
41	3.74023	I	5	TRIM22	tripartite motif containing 22 [Source:HGNC Symbol;Acc:16379]		ENSG00000132274	213293_s_at
44	28.0937	I	6	TRIM22	tripartite motif containing 22 [Source:HGNC Symbol;Acc:16379]		ENSG00000132274	213293_s_at
47	24.3669	I	5	TRIM22	tripartite motif containing 22 [Source:HGNC Symbol;Acc:16379]		ENSG00000132274	213293_s_at
48	19.4623	I	5	TRIM22	tripartite motif containing 22 [Source:HGNC Symbol;Acc:16379]		ENSG00000132274	213293_s_at
60	3.43093	I	24	TRIM22	tripartite motif containing 22 [Source:HGNC Symbol;Acc:16379]		ENSG00000132274	213293_s_at
61	3.18823	I	72	TRIM22	tripartite motif containing 22 [Source:HGNC Symbol;Acc:16379]		ENSG00000132274	213293_s_at
63	3.97868	II	6	TRIM22	tripartite motif containing 22 [Source:HGNC Symbol;Acc:16379]		ENSG00000132274	213293_s_at
64	3.07027	II	24	TRIM22	tripartite motif containing 22 [Source:HGNC Symbol;Acc:16379]		ENSG00000132274	213293_s_at
67	2.49538	I	6	TRIM22	tripartite motif containing 22 [Source:HGNC Symbol;Acc:16379]		ENSG00000132274	213293_s_at
68	9.21833	II	96	TRIM22	tripartite motif containing 22 [Source:HGNC Symbol;Acc:16379]		ENSG00000132274	213293_s_at
177	3.52947	I	48	TRIM22	tripartite motif containing 22 [Source:HGNC Symbol;Acc:16379]		ENSG00000132274	213293_s_at
183	4.88302	II	24	TRIM22	tripartite motif containing 22 [Source:HGNC Symbol;Acc:16379]		ENSG00000132274	213293_s_at
184	3.37674	II	24	TRIM22	tripartite motif containing 22 [Source:HGNC Symbol;Acc:16379]		ENSG00000132274	213293_s_at
185	3.04074	I	16	TRIM22	tripartite motif containing 22 [Source:HGNC Symbol;Acc:16379]		ENSG00000132274	213293_s_at
295	5.63349	II	24	TRIM22	tripartite motif containing 22 [Source:HGNC Symbol;Acc:16379]		ENSG00000132274	213293_s_at
313	2.61398	II	72	TRIM22	tripartite motif containing 22 [Source:HGNC Symbol;Acc:16379]		ENSG00000132274	213293_s_at
32	3.13578	I	3	TRIM22	tripartite motif containing 22 [Source:HGNC Symbol;Acc:16379]		ENSG00000132274	36825_at
75	7.49234	I	16	TRIM22	tripartite motif containing 22 [Source:HGNC Symbol;Acc:16379]		ENSG00000132274	ILMN_1779252
78	8.5186	I	12	TRIM22	tripartite motif containing 22 [Source:HGNC Symbol;Acc:16379]		ENSG00000132274	ILMN_1779252
79	8.79309	I	24	TRIM22	tripartite motif containing 22 [Source:HGNC Symbol;Acc:16379]		ENSG00000132274	ILMN_1779252
80	6.14111	I	48	TRIM22	tripartite motif containing 22 [Source:HGNC Symbol;Acc:16379]		ENSG00000132274	ILMN_1779252
82	3.41482	II	12	TRIM22	tripartite motif containing 22 [Source:HGNC Symbol;Acc:16379]		ENSG00000132274	ILMN_1779252
83	8.76462	II	24	TRIM22	tripartite motif containing 22 [Source:HGNC Symbol;Acc:16379]		ENSG00000132274	ILMN_1779252
85	6.48488	II	48	TRIM22	tripartite motif containing 22 [Source:HGNC Symbol;Acc:16379]		ENSG00000132274	ILMN_1779252
123	3.17482	II	168	TRIM22	tripartite motif containing 22 [Source:HGNC Symbol;Acc:16379]		ENSG00000132274	ILMN_1779252
124	5.3343	II	168	TRIM22	tripartite motif containing 22 [Source:HGNC Symbol;Acc:16379]		ENSG00000132274	ILMN_1779252
128	6.01147	II	10	TRIM22	tripartite motif containing 22 [Source:HGNC Symbol;Acc:16379]		ENSG00000132274	ILMN_1779252
129	7.54613	I	10	TRIM22	tripartite motif containing 22 [Source:HGNC Symbol;Acc:16379]		ENSG00000132274	ILMN_1779252
130	6.81457	I	10	TRIM22	tripartite motif containing 22 [Source:HGNC Symbol;Acc:16379]		ENSG00000132274	ILMN_1779252
131	7.33534	II	10	TRIM22	tripartite motif containing 22 [Source:HGNC Symbol;Acc:16379]		ENSG00000132274	ILMN_1779252
160	6.78918	I	18	TRIM22	tripartite motif containing 22 [Source:HGNC Symbol;Acc:16379]		ENSG00000132274	ILMN_1779252
161	2.96794	I	6	TRIM22	tripartite motif containing 22 [Source:HGNC Symbol;Acc:16379]		ENSG00000132274	ILMN_1779252
163	2.86765	I	3	TRIM22	tripartite motif containing 22 [Source:HGNC Symbol;Acc:16379]		ENSG00000132274	ILMN_1779252
200	3.4231	I	10	TRIM22	tripartite motif containing 22 [Source:HGNC Symbol;Acc:16379]		ENSG00000132274	ILMN_1779252
277	13.9259	I	8	TRIM22	tripartite motif containing 22 [Source:HGNC Symbol;Acc:16379]		ENSG00000132274	ILMN_1779252
278	3.97596	I	2	TRIM22	tripartite motif containing 22 [Source:HGNC Symbol;Acc:16379]		ENSG00000132274	ILMN_1779252
279	5.10488	I	48	TRIM22	tripartite motif containing 22 [Source:HGNC Symbol;Acc:16379]		ENSG00000132274	ILMN_1779252
280	4.0044	I	48	TRIM22	tripartite motif containing 22 [Source:HGNC Symbol;Acc:16379]		ENSG00000132274	ILMN_1779252
281	5.56845	I	48	TRIM22	tripartite motif containing 22 [Source:HGNC Symbol;Acc:16379]		ENSG00000132274	ILMN_1779252
284	2.4616	II	6	TRIM22	tripartite motif containing 22 [Source:HGNC Symbol;Acc:16379]		ENSG00000132274	ILMN_1779252
354	2.6502	I	48	TRIM22	tripartite motif containing 22 [Source:HGNC Symbol;Acc:16379]		ENSG00000132274	ILMN_1779252
356	3.46711	I	24	TRIM22	tripartite motif containing 22 [Source:HGNC Symbol;Acc:16379]		ENSG00000132274	ILMN_1779252
358	2.99426	I	12	TRIM22	tripartite motif containing 22 [Source:HGNC Symbol;Acc:16379]		ENSG00000132274	ILMN_1779252
362	4.58264	I	6	TRIM22	tripartite motif containing 22 [Source:HGNC Symbol;Acc:16379]		ENSG00000132274	ILMN_1779252
373	3.66885	I	24	TRIM22	tripartite motif containing 22 [Source:HGNC Symbol;Acc:16379]		ENSG00000132274	ILMN_1779252
374	2.30219	I	6	TRIM22	tripartite motif containing 22 [Source:HGNC Symbol;Acc:16379]		ENSG00000132274	ILMN_1779252
375	2.62699	I	6	TRIM22	tripartite motif containing 22 [Source:HGNC Symbol;Acc:16379]		ENSG00000132274	ILMN_1779252
87	11.1426	II	12	TRIM22	tripartite motif containing 22 [Source:HGNC Symbol;Acc:16379]		ENSG00000132274	7938035
88	8.48279	II	24	TRIM22	tripartite motif containing 22 [Source:HGNC Symbol;Acc:16379]		ENSG00000132274	7938035
90	6.09695	II	72	TRIM22	tripartite motif containing 22 [Source:HGNC Symbol;Acc:16379]		ENSG00000132274	7938035
91	2.39476	II	72	TRIM22	tripartite motif containing 22 [Source:HGNC Symbol;Acc:16379]		ENSG00000132274	7938035
119	2.61294	I	120	TRIM22	tripartite motif containing 22 [Source:HGNC Symbol;Acc:16379]		ENSG00000132274	7938035
120	2.52255	I	120	TRIM22	tripartite motif containing 22 [Source:HGNC Symbol;Acc:16379]		ENSG00000132274	7938035
122	3.93956	I	120	TRIM22	tripartite motif containing 22 [Source:HGNC Symbol;Acc:16379]		ENSG00000132274	7938035
143	3.67065	I	6	TRIM22	tripartite motif containing 22 [Source:HGNC Symbol;Acc:16379]		ENSG00000132274	7938035
201	2.52063	I	2	TRIM22	tripartite motif containing 22 [Source:HGNC Symbol;Acc:16379]		ENSG00000132274	7938035
202	2.7942	I	6	TRIM22	tripartite motif containing 22 [Source:HGNC Symbol;Acc:16379]		ENSG00000132274	7938035
203	2.18937	I	18	TRIM22	tripartite motif containing 22 [Source:HGNC Symbol;Acc:16379]		ENSG00000132274	7938035
307	2.53242	II	48	TRIM22	tripartite motif containing 22 [Source:HGNC Symbol;Acc:16379]		ENSG00000132274	7938035
201	3.42202	I	2	TRIM22	tripartite motif containing 22 [Source:HGNC Symbol;Acc:16379]		ENSG00000132274	7938049
202	2.57639	I	6	TRIM22	tripartite motif containing 22 [Source:HGNC Symbol;Acc:16379]		ENSG00000132274	7938049
308	3.54056	II	48	TRIM22	tripartite motif containing 22 [Source:HGNC Symbol;Acc:16379]		ENSG00000132274	7938049
53	4.83954	III	6	TRIM25	tripartite motif containing 25 [Source:HGNC Symbol;Acc:12932]		ENSG00000121060	A_24_P936767
59	4.26211	III	6	TRIM25	tripartite motif containing 25 [Source:HGNC Symbol;Acc:12932]		ENSG00000121060	A_24_P936767
146	7.44734	II	4	TRIM25	tripartite motif containing 25 [Source:HGNC Symbol;Acc:12932]		ENSG00000121060	A_24_P936767
147	8.65424	I	4	TRIM25	tripartite motif containing 25 [Source:HGNC Symbol;Acc:12932]		ENSG00000121060	A_24_P936767
148	2.33748	I	6	TRIM25	tripartite motif containing 25 [Source:HGNC Symbol;Acc:12932]		ENSG00000121060	A_24_P936767
146	3.2027	II	4	TRIM25	tripartite motif containing 25 [Source:HGNC Symbol;Acc:12932]		ENSG00000121060	A_23_P15326
147	4.06043	I	4	TRIM25	tripartite motif containing 25 [Source:HGNC Symbol;Acc:12932]		ENSG00000121060	A_23_P15326
318	2.29829	II	6	TRIM25	tripartite motif containing 25 [Source:HGNC Symbol;Acc:12932]		ENSG00000121060	A_23_P15326
319	2.25218	II	18	TRIM25	tripartite motif containing 25 [Source:HGNC Symbol;Acc:12932]		ENSG00000121060	A_23_P15326
32	8.37926	I	3	TRIM25	tripartite motif containing 25 [Source:HGNC Symbol;Acc:12932]		ENSG00000121060	1617_at
43	5.16643	I	12	TRIM25	tripartite motif containing 25 [Source:HGNC Symbol;Acc:12932]		ENSG00000121060	224806_at
44	14.7954	I	6	TRIM25	tripartite motif containing 25 [Source:HGNC Symbol;Acc:12932]		ENSG00000121060	224806_at
45	3.90538	I	12	TRIM25	tripartite motif containing 25 [Source:HGNC Symbol;Acc:12932]		ENSG00000121060	224806_at
46	6.32776	I	6	TRIM25	tripartite motif containing 25 [Source:HGNC Symbol;Acc:12932]		ENSG00000121060	224806_at
47	4.47166	I	5	TRIM25	tripartite motif containing 25 [Source:HGNC Symbol;Acc:12932]		ENSG00000121060	224806_at
48	4.47037	I	5	TRIM25	tripartite motif containing 25 [Source:HGNC Symbol;Acc:12932]		ENSG00000121060	224806_at
60	2.58305	I	24	TRIM25	tripartite motif containing 25 [Source:HGNC Symbol;Acc:12932]		ENSG00000121060	224806_at
300	2.63741	I	6	TRIM25	tripartite motif containing 25 [Source:HGNC Symbol;Acc:12932]		ENSG00000121060	224806_at
305	2.95019	II	1.5	TRIM25	tripartite motif containing 25 [Source:HGNC Symbol;Acc:12932]		ENSG00000121060	224806_at
306	2.43064	I	1.5	TRIM25	tripartite motif containing 25 [Source:HGNC Symbol;Acc:12932]		ENSG00000121060	224806_at
15	2.69514	I	6	TRIM25	tripartite motif containing 25 [Source:HGNC Symbol;Acc:12932]		ENSG00000121060	206911_at
23	2.74426	I	8	TRIM25	tripartite motif containing 25 [Source:HGNC Symbol;Acc:12932]		ENSG00000121060	206911_at
25	2.54542	I	4	TRIM25	tripartite motif containing 25 [Source:HGNC Symbol;Acc:12932]		ENSG00000121060	206911_at
37	10.5319	II	5	TRIM25	tripartite motif containing 25 [Source:HGNC Symbol;Acc:12932]		ENSG00000121060	206911_at
38	18.8167	I	5	TRIM25	tripartite motif containing 25 [Source:HGNC Symbol;Acc:12932]		ENSG00000121060	206911_at
41	3.48364	I	5	TRIM25	tripartite motif containing 25 [Source:HGNC Symbol;Acc:12932]		ENSG00000121060	206911_at
44	2.86143	I	6	TRIM25	tripartite motif containing 25 [Source:HGNC Symbol;Acc:12932]		ENSG00000121060	206911_at
46	2.23154	I	6	TRIM25	tripartite motif containing 25 [Source:HGNC Symbol;Acc:12932]		ENSG00000121060	206911_at
63	3.12861	II	6	TRIM25	tripartite motif containing 25 [Source:HGNC Symbol;Acc:12932]		ENSG00000121060	206911_at
299	2.00541	II	24	TRIM25	tripartite motif containing 25 [Source:HGNC Symbol;Acc:12932]		ENSG00000121060	206911_at
300	2.78794	I	6	TRIM25	tripartite motif containing 25 [Source:HGNC Symbol;Acc:12932]		ENSG00000121060	206911_at
305	3.85958	II	1.5	TRIM25	tripartite motif containing 25 [Source:HGNC Symbol;Acc:12932]		ENSG00000121060	206911_at
306	3.58331	I	1.5	TRIM25	tripartite motif containing 25 [Source:HGNC Symbol;Acc:12932]		ENSG00000121060	206911_at
75	7.52764	I	16	TRIM25	tripartite motif containing 25 [Source:HGNC Symbol;Acc:12932]		ENSG00000121060	ILMN_1813625
78	2.09762	I	12	TRIM25	tripartite motif containing 25 [Source:HGNC Symbol;Acc:12932]		ENSG00000121060	ILMN_1813625
81	2.4431	I	4	TRIM25	tripartite motif containing 25 [Source:HGNC Symbol;Acc:12932]		ENSG00000121060	ILMN_1813625
84	2.3545	II	4	TRIM25	tripartite motif containing 25 [Source:HGNC Symbol;Acc:12932]		ENSG00000121060	ILMN_1813625
85	2.16221	II	48	TRIM25	tripartite motif containing 25 [Source:HGNC Symbol;Acc:12932]		ENSG00000121060	ILMN_1813625
128	4.14413	II	10	TRIM25	tripartite motif containing 25 [Source:HGNC Symbol;Acc:12932]		ENSG00000121060	ILMN_1813625
129	5.29122	I	10	TRIM25	tripartite motif containing 25 [Source:HGNC Symbol;Acc:12932]		ENSG00000121060	ILMN_1813625
130	3.78255	I	10	TRIM25	tripartite motif containing 25 [Source:HGNC Symbol;Acc:12932]		ENSG00000121060	ILMN_1813625
131	2.71888	II	10	TRIM25	tripartite motif containing 25 [Source:HGNC Symbol;Acc:12932]		ENSG00000121060	ILMN_1813625
160	3.12212	I	18	TRIM25	tripartite motif containing 25 [Source:HGNC Symbol;Acc:12932]		ENSG00000121060	ILMN_1813625
200	2.01912	I	10	TRIM25	tripartite motif containing 25 [Source:HGNC Symbol;Acc:12932]		ENSG00000121060	ILMN_1813625
249	5.66248	I	12	TRIM25	tripartite motif containing 25 [Source:HGNC Symbol;Acc:12932]		ENSG00000121060	ILMN_1813625
250	2.31339	I	2	TRIM25	tripartite motif containing 25 [Source:HGNC Symbol;Acc:12932]		ENSG00000121060	ILMN_1813625
251	4.36288	I	24	TRIM25	tripartite motif containing 25 [Source:HGNC Symbol;Acc:12932]		ENSG00000121060	ILMN_1813625
253	5.25362	I	4	TRIM25	tripartite motif containing 25 [Source:HGNC Symbol;Acc:12932]		ENSG00000121060	ILMN_1813625
254	6.60734	I	6	TRIM25	tripartite motif containing 25 [Source:HGNC Symbol;Acc:12932]		ENSG00000121060	ILMN_1813625
257	2.05681	III	12	TRIM25	tripartite motif containing 25 [Source:HGNC Symbol;Acc:12932]		ENSG00000121060	ILMN_1813625
261	2.26522	III	6	TRIM25	tripartite motif containing 25 [Source:HGNC Symbol;Acc:12932]		ENSG00000121060	ILMN_1813625
275	6.48755	I	8	TRIM25	tripartite motif containing 25 [Source:HGNC Symbol;Acc:12932]		ENSG00000121060	ILMN_1813625
276	4.67818	I	2	TRIM25	tripartite motif containing 25 [Source:HGNC Symbol;Acc:12932]		ENSG00000121060	ILMN_1813625
277	5.4024	I	8	TRIM25	tripartite motif containing 25 [Source:HGNC Symbol;Acc:12932]		ENSG00000121060	ILMN_1813625
278	3.67097	I	2	TRIM25	tripartite motif containing 25 [Source:HGNC Symbol;Acc:12932]		ENSG00000121060	ILMN_1813625
[truncated: 26 more rows]
